# Supplementary material for: Nickel catalyzed C–S cross coupling of sterically hindered substrates enabled by flexible bidentate phosphines
Source: Royal Society of Chemistry journal article supplement (doi:10.1039/d4qo00260a), 2024-01-01
Supplement: d4qo00260a1.pdf [file d4qo00260a1.pdf]

**Nickel catalyzed C–S cross coupling of sterically hindered substrates enabled by flexible  
bidentate phosphines**

SUPPORTING INFORMATION

Ivo H. Lindenmaier, Robert C. Richter and Ivana Fleischer\*

Institute of Organic Chemistry, Faculty of Science,  
Eberhard Karls Universität Tübingen, Auf der Morgenstelle 18, 72076 Tübingen, Germany  
\*ivana.fleischer@uni-tuebingen.de

## Table of Contents

|                                                                        |             |
|------------------------------------------------------------------------|-------------|
| <b>1. General Information .....</b>                                    | <b>S3</b>   |
| 1.1 Chemicals and General Techniques .....                             | S3          |
| 1.2 Analytical Techniques .....                                        | S3          |
| <b>2. General Procedures .....</b>                                     | <b>S5</b>   |
| <b>3. Detailed Screening Information .....</b>                         | <b>S8</b>   |
| 3.1 Ligand screening .....                                             | S8          |
| 3.2 Solvent Screening.....                                             | S10         |
| 3.3. Catalyst screening .....                                          | S10         |
| 3.4 Other reaction parameters .....                                    | S11         |
| 3.5 Kinetic Investigations .....                                       | S12         |
| <b>4. Competition Experiments and Mechanistic studies .....</b>        | <b>S13</b>  |
| <b>5. Analytical Data.....</b>                                         | <b>S16</b>  |
| 5.1 Synthesis of Ni1.....                                              | S16         |
| 5.2 Synthesis of Aryl Triflates.....                                   | S19         |
| 5.3 Synthesis of <i>ortho</i> -substituted aryl alkyl thioethers ..... | S90         |
| <b>6. Unsuccessful Substrates.....</b>                                 | <b>S182</b> |
| <b>7. Computational Methods and Data .....</b>                         | <b>S183</b> |
| <b>8. Crystallographic Data.....</b>                                   | <b>S226</b> |
| <b>9. GC-FID Calibration Data .....</b>                                | <b>S229</b> |
| <b>10. References .....</b>                                            | <b>S233</b> |

## 1. General Information

### 1.1 Chemicals and General Techniques

All cross-coupling reactions were carried out under an argon atmosphere using standard Schlenk techniques or an argon atmosphere Glovebox (GS MEGA E-Line, Glovebox Systemtechnik) and pre-dried glassware, unless noted otherwise. THF (HPLC-grade) was pre-dried over KOH, subjected to a column of Al<sub>2</sub>O<sub>3</sub> (neutral), stored over 3 Å MS for at least 5 days and degassed by bubbling a stream of argon through the solvent for at least 20 min. DCM, *n*-hexane and EtOAc were distilled prior to use. Dry toluene was bought from Acros and degassed by bubbling a stream of argon through the solvent. Column chromatography was carried out either manually using silica gel (0.04–0.063 mm) from Machery&Nagel or by a Puriflash system (Interchim XS420) using pre-packed columns (30 or 50 μm) from Interchim or Büchi. Thin Layer Chromatography was performed on silica gel coated glass plates (0.25 mm) with fluorescence indicator UV254 (Macherey-Nagel, TLC plates SIL G-25 UV254). For detection of spots, irradiation of UV light at 254 nm was used. Chemicals were purchased from abcr, Acros, Alfa Aesar, BLDChem, Carbolution Chemicals, Carl Roth, Fluorochem, Sigma-Aldrich or TCI. Ni(cod)<sub>2</sub> was purchased from Sigma Aldrich, Alfa Aesar or abcr without noticeable difference in reactivity and stored at -40 °C in a glovebox. DPEphos was purchased from Sigma Aldrich and used as received. Dppbz was purchased from Alfa Aesar or fluorochem. KOAc was dried prior to use at 110 °C under high vacuum. 1-Adamantane thiol was purchased from Sigma Aldrich or BLDpharm (both 95% purity, used as received), stored and handled in a glovebox at room temperature. Other thiols were stored as received at -15 °C and handled under Argon flow. Pyridine (analytical grade) was used as received.

The aryl bromides **1p** – **1s** were commercially available.

The reaction temperature of experiments performed at “room temperature” varied between 25–32 °C. However, differences in reactivity were small to this variance.

### 1.2 Analytical Techniques

NMR spectra were recorded using Bruker Avance III HD 400 or Bruker Avance III HDX 600 at room temperature (400 MHz for <sup>1</sup>H experiments; 101 MHz for <sup>13</sup>C experiments; 162 MHz; 376 MHz for <sup>19</sup>F experiments) in commercially available deuterated solvents. <sup>13</sup>C-NMR experiments were performed in proton-decoupled mode. Chemical shifts (δ) are reported in ppm relative to the residual NMR solvent signals<sup>1</sup> (chloroform: <sup>1</sup>H 7.26 ppm and <sup>13</sup>C 77.16 ppm). Hetero-NMR chemical shifts are given relative to external standards (<sup>19</sup>F: CFCl<sub>3</sub>;

$^{31}\text{P}$ :  $\text{H}_3\text{PO}_4$  (85%). The coupling constants ( $J$  values) are given in Hz and spin multiplicity with the usual designations for splitting patterns (s = singlet, d = doublet, t = triplet, q = quartet, m = multiplet, br s = broad singlet).

HR-MS (ESI, APCI, EI) measurements were carried out by the mass spectrometry department of the Institute of Organic Chemistry, University of Tübingen. Measurements were carried out using maXis 4G from Bruker (ESI, APCI) or by a MAT95 from Finnegan (EI). The molecular ion  $[\text{M}]^+$ ,  $[\text{M}+\text{H}]^+$  and  $[\text{M}+\text{Na}]^+$  respectively are given in  $m/z$  units.

**Note:** When measuring *ortho*-substituted adamantyl-thioethers, we often encountered the issue, that the molecular ion peak was minor. Instead,  $[\text{M}+138]^+$  was frequently present in the respective mass spectrum, even when using mild ionization methods such as APCI. We ascribe this to the scrambling of the thioether as follows:

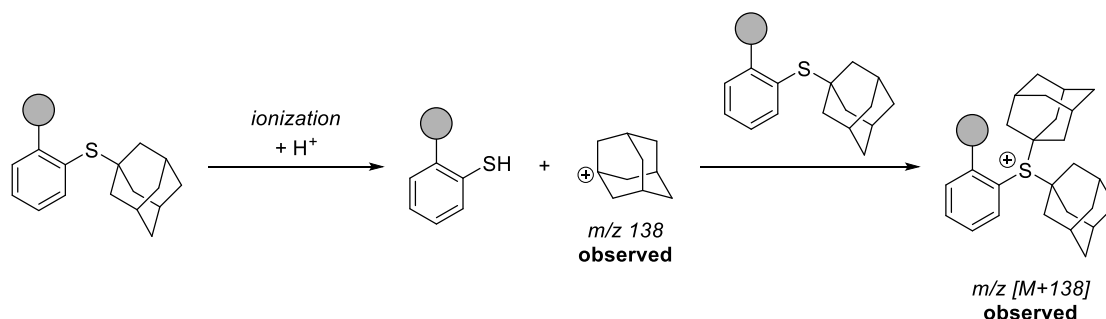

**Scheme S1:** Proposed scrambling of *ortho*-substituted aryl adamantyl thioethers during measurement of HR-MS spectra.

GC-FID (flame ionization detection) analysis was carried out on an Agilent 7820A system using dry hydrogen as carrier gas. An Agilent 19091J-431 column ( $30\text{ m} \times 320\text{ }\mu\text{m} \times 0.25\text{ }\mu\text{m}$ ) was used. Program 50-280M15: heating from  $50\text{ }^\circ\text{C}$  to  $280\text{ }^\circ\text{C}$  within 15 minutes. Conversion and yield were determined *via* calibration against the internal standard pentadecane.

Melting point determination was achieved by using a Büchi B-540 machine with a visual detection (heating rate  $5\text{ }^\circ\text{C}/\text{min}$ ).

FT-IR spectra were recorded using a Cary 630 FTIR by applying the sample neat on a diamond ATR sampler.



transforming the triflate to the phenol, while leaving the thioether intact. Afterwards, chromatographic separation was possible.

**General Procedure C (GP-C):** Nickel-catalyzed C–S cross-coupling of aryl triflates and thiols for product isolation using dppbz as ligand.

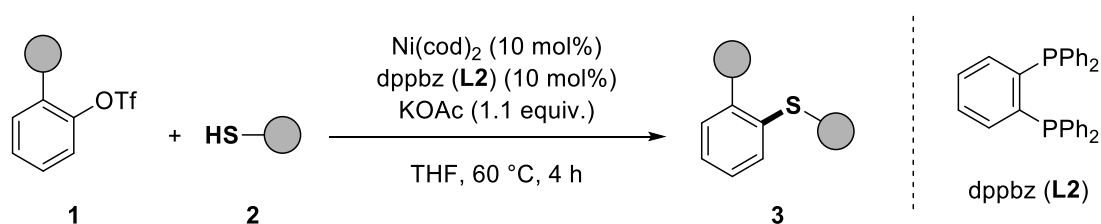

A 25 mL inert, flame-dried and septum-capped Schlenk-tube equipped with a stirring bar was charged with KOAc (1.1 equiv.), dppbz (10 mol%) and Ni(cod)<sub>2</sub> (10 mol%). After addition of the respective thiol (1.05 equiv.) and the corresponding aryl triflate (1 mmol, 1.0 equiv.) the mixture was dissolved in dry THF (2 mL) under stirring. After 4 h at 60 °C, the reaction mixture was diluted with EtOAc (10 mL) and concentrated *in vacuo*. The residue was purified by flash column chromatography (*n*-hexane/EtOAc).

**General Procedure D (GP-D):** Nickel-catalyzed C–S cross-coupling of aryl and thiols for GC-FID analysis (screening).

A 10 mL inert, flame-dried and septum-capped Schlenk-tube equipped with a stirring bar was charged with KOAc (1.5 equiv.), ligand (10 mol%) and Ni(cod)<sub>2</sub> (10 mol%). After addition of the respective thiol (1.1 equiv.) and the corresponding aryl triflate (0.1 mmol, 1.0 equiv.) the mixture was dissolved in dry THF (1 mL) under stirring. After 16 h at 60 °C, the reaction was allowed to cool to rt and the internal standard *n*-pentadecane (50 μL) was added. The reaction mixture was quenched with brine (1 mL) and diluted with EtOAc (3 mL). A sample of the organic phase was filtered (glass pipette filled with cotton, celite, Al<sub>2</sub>O<sub>3</sub> and MgSO<sub>4</sub>) and analyzed *via* GC-FID. Yields and conversion were determined through the internal standard method for quantitative analysis.

### 3. Detailed Screening Information

#### 3.1 Ligand screening

**Table S1.** Ligand screening. Yields and conversion were determined by quantitative GC-FID.

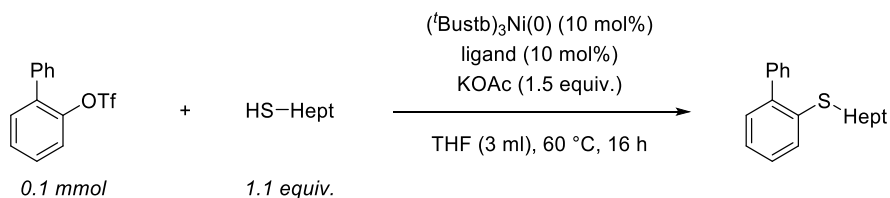

| Entry | Ligand                     | Conv. [%] | Yield [%] |          |         |                                             |
|-------|----------------------------|-----------|-----------|----------|---------|---------------------------------------------|
| 1     | Xantphos                   | 16        | 4         | Xantphos | DPEphos | n = 1: dppm<br>n = 4: dppb<br>n = 5: dppent |
| 2     | DPEPhos                    | 55        | 45        |          |         |                                             |
| 3     | dppm                       | 14        | n. d.     |          |         |                                             |
| 4     | dtbpx                      | 12        | n. d.     |          |         |                                             |
| 5     | dppf                       | 53        | 44        |          |         |                                             |
| 6     | L3                         | 21        | 8         |          |         |                                             |
| 7     | L4                         | 12        | n. d.     |          |         |                                             |
| 8     | Me-Ferrocen                | 12        | n. d.     |          |         |                                             |
| 9     | Josiphos                   | 14        | n. d.     |          |         |                                             |
| 10    | PPh <sub>3</sub> (20 mol%) | 13        | n. d.     |          |         |                                             |
| 11    | CTC-Q-Phos (20 mol%)       | 12        | n. d.     |          |         |                                             |
| 12    | SPhos (20 mol%)            | 13        | n. d.     |          |         |                                             |
| 13    | BiPhePhos                  | 3         | n. d.     |          |         |                                             |
| 14    | IMesCl                     | 13        | n. d.     |          |         |                                             |
| 15    | L5                         | 17        | n. d.     |          |         |                                             |

BiPhePhos

L5



**Table S2.** Ligand screening for the coupling of 2,6-dimethyl phenyl triflate. Yields were estimated by GC-MS.

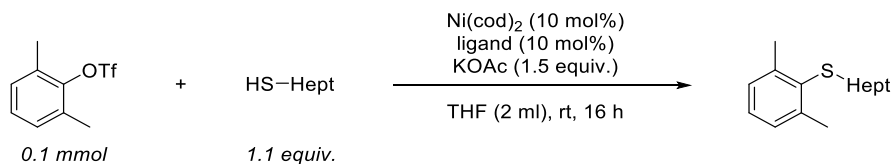

| Entry | ligand                     | Yield [%] <sup>a</sup> |                                                    |         |               |
|-------|----------------------------|------------------------|----------------------------------------------------|---------|---------------|
| 1     | DPEphos                    | n. d.                  |                                                    |         |               |
| 2     | dppf                       | n. d.                  |                                                    |         |               |
| 3     | dppbz                      | trace                  | dppbz                                              | dppbm   | L6            |
| 4     | dppbz, 60 °C               | 6                      |                                                    |         |               |
| 5     | dppbz, 100 °C              | 30                     | L7                                                 | L8      | L9            |
| 6     | dppbm                      | trace                  |                                                    |         |               |
| 7     | L6                         | n. d.                  |                                                    |         |               |
| 8     | L7                         | n. d.                  | BIPHEP                                             | DBFphos | N-Xantphos    |
| 9     | L8                         | n. d.                  |                                                    |         |               |
| 10    | L9                         | n. d.                  | $\text{Ph}_2\text{P}-(\text{CH}_2)_n-\text{PPh}_2$ | dcyph   |               |
| 11    | BIPHEP                     | trace                  | n = 4: dppbut<br>n = 5: dpppent                    |         | Ar =          |
| 12    | DBFphos                    | n. d.                  |                                                    |         | MeDPEphos     |
| 13    | N-Xantphos                 | n. d.                  |                                                    |         | Ar =          |
| 14    | dppbut                     | n. d.                  |                                                    |         | OMeDPEphos    |
| 15    | dpppent                    | n. d.                  |                                                    |         |               |
| 16    | dcyph                      | n. d.                  |                                                    |         |               |
| 17    | <sup>Me</sup> DPEphos      | n. d.                  |                                                    |         |               |
| 18    | <sup>OMe</sup> DPEphos     | n. d.                  |                                                    |         |               |
| 19    | CyTyrannophos<br>(20 mol%) | n. d.                  |                                                    |         |               |
| 20    | PCy <sub>3</sub> (20 mol%) | n. d.                  | tbybpy                                             | phen    | CyTyrannoPhos |
| 21    | tbubpy                     | n. d.                  |                                                    |         |               |
| 22    | phen                       | n. d.                  |                                                    |         |               |

### 3.2 Solvent Screening

**Table S3.** Solvent Screening. Yields and conversion were determined by quantitative GC-FID.

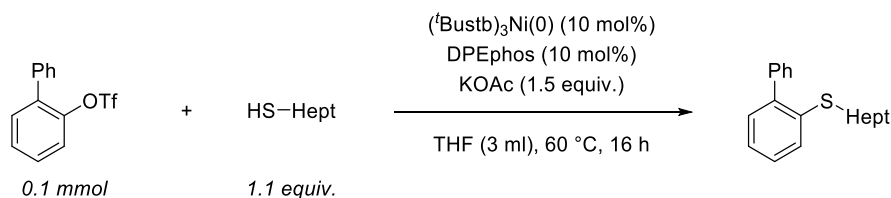

| Entry | Solvent                 | Conv. [%] | Yield [%] |
|-------|-------------------------|-----------|-----------|
| 1     | THF                     | 55        | 45        |
| 2     | NMP instead of THF      | 52        | n. d.     |
| 3     | THF/NMP (2:1)           | 29        | 13        |
| 4     | 2-Me-THF instead of THF | 18        | 4         |
| 5     | Toluene instead of THF  | 16        | 3         |
| 6     | DMF instead of THF      | 58        | 0         |
| 7     | 2-Me-THF, 110 °C        | 22        | 9         |

### 3.3. Catalyst screening

**Table S4.** (Pre-)Catalyst screening. Yields and conversion were determined by quantitative GC-FID.

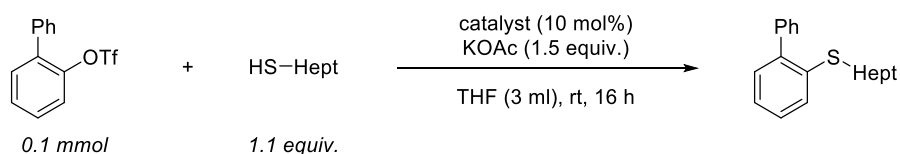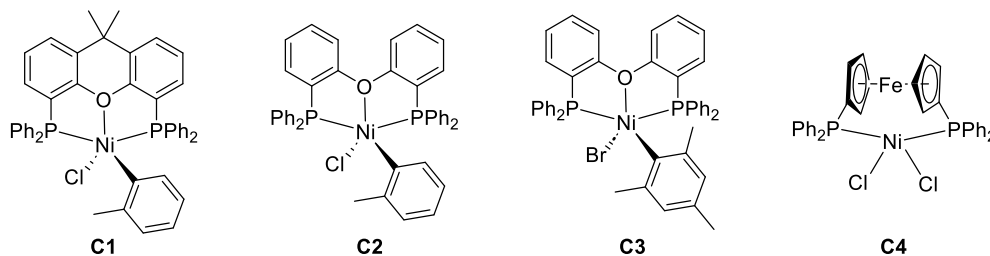

| Entry | (Pre-)Catalyst                                                        | Conv. [%] | Yield [%] |
|-------|-----------------------------------------------------------------------|-----------|-----------|
| 1     | $\text{Ni}(\text{tBu})_3(\text{stilbene})_3/\text{DPEphos}$ , 5 mol%  | 21        | 8         |
| 2     | $\text{Ni}(\text{tBu})_3(\text{stilbene})_3/\text{DPEphos}$ , 10 mol% | 55        | 45        |
| 3     | $\text{Ni}(\text{tBu})_3(\text{stilbene})_3/\text{DPEphos}$ , 15 mol% | 72        | 69        |

|    |                                                               |        |       |
|----|---------------------------------------------------------------|--------|-------|
| 4  | Ni(cod) <sub>2</sub> /DPEphos, 10 mol%                        | 93     | 95    |
| 5  | Ni(cod) <sub>2</sub> /DPEphos, 5 mol%                         | 21     | 8     |
| 6  | <b>C1</b> , 1.2 equiv. thiol                                  | N/A    | n. d. |
| 7  | <b>C2</b> , 1.2 equiv. thiol                                  | 22     | 7     |
| 8  | <b>C3</b> , 1.2 equiv. thiol                                  | 14     | n. d. |
| 9  | <b>C4</b> , 1.2 equiv. thiol                                  | 11     | n. d. |
| 10 | <b>C4</b> , 1.2 equiv. thiol + 1.0 equiv. Zn                  | 13     | n. d. |
| 11 | NiOAc <sub>2</sub> /DPEphos (10 mol%), + 1.0 equiv. Zn, 60 °C | quant. | 91    |
| 11 | Pd <sub>2</sub> dba <sub>3</sub> /DPEphos (10 mol% Pd)        | 0      | n. d. |

### 3.4 Other reaction parameters

**Table S5.** Screening of other reaction parameters. Yields were estimated by GC-MS.

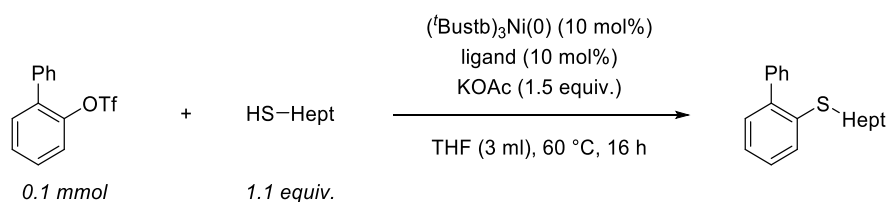

| Entry | Variation from standard conditions | Yield [%] |
|-------|------------------------------------|-----------|
| 1     | none                               | 45        |
| 2     | Room temperature                   | 70        |
| 3     | 2 days reaction time               | 50        |
| 4     | + LiCl (1.0 equiv.)                | trace     |

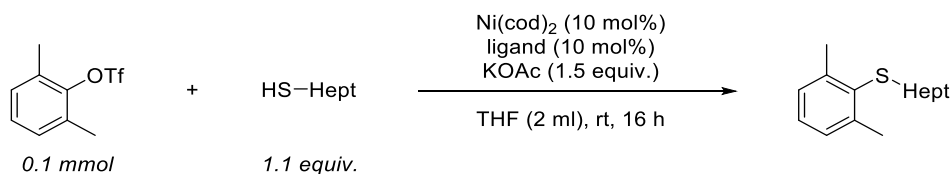

| Entry | Variation from standard conditions                               | Yield [%] |
|-------|------------------------------------------------------------------|-----------|
| 1     | none                                                             | n. d.     |
| 2     | CsOAc instead of KOAc                                            | n. d.     |
| 3     | + MeCN (1.0 equiv.)                                              | n. d.     |
| 4     | THF/MeCN (3:1)                                                   | n. d.     |
| 5     | MeCN instead of THF                                              | n. d.     |
| 6     | + PhCN (1.0 equiv.)                                              | n. d.     |
| 7     | Pd <sub>2</sub> dba <sub>3</sub> instead of Ni(cod) <sub>2</sub> | n. d.     |

### 3.5 Investigation of the Reaction Progress

A 10 mL inert, flame-dried and septum-caped Schlenk-tube equipped with a stirring bar was charged with KOAc (108 mg, 1.10 mmol, 1.1 equiv.), DPEphos (**L2**) (53.9 mg, 100.0  $\mu\text{mol}$ , 10 mol%) and  $\text{Ni}(\text{cod})_2$  (27.5 mg, 100.0  $\mu\text{mol}$ , 10 mol%), 1-adamantane thiol (**2b**) (177 mg, 1.05 mmol, 1.05 equiv.). After addition of 2-biphenyl trifluoromethanesulfonate (**1a**) (302 mg, 1.0 mmol, 1.0 equiv.) and internal standard pentadecane (100  $\mu\text{L}$ ), the mixture was dissolved in dry THF (3 mL) under stirring. Samples (ca. 20  $\mu\text{L}$ ) were taking from this mixture *via* syringe, quenched with brine and diluted with EtOAc. The organic phase was filtered (glass pipette filled with cotton, celite,  $\text{Al}_2\text{O}_3$  and  $\text{MgSO}_4$ ) and analyzed *via* quantitative GC-FID.

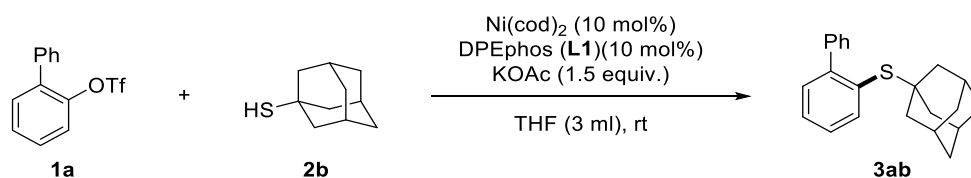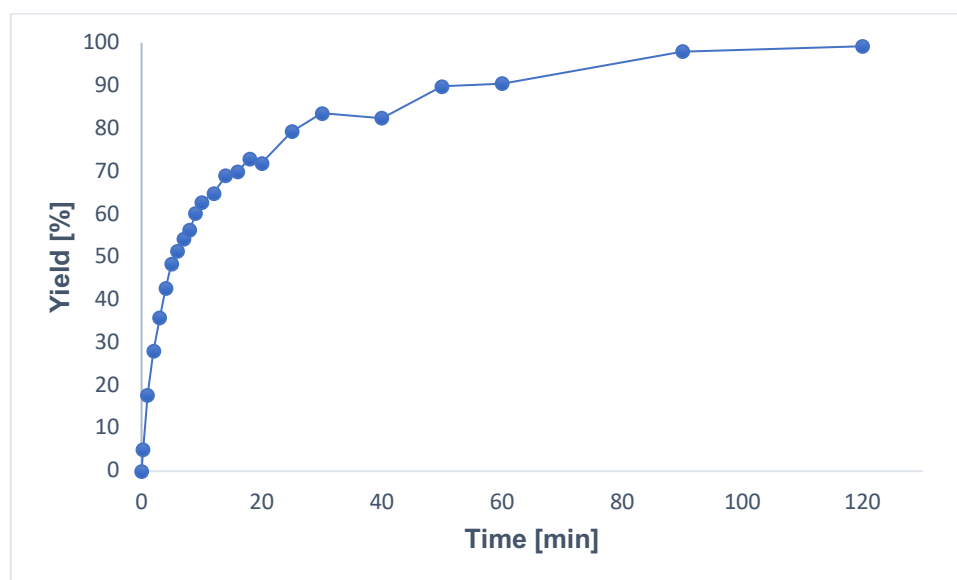

**Figure S1.** Kinetic investigation of the nickel-catalyzed reaction of **1a** with **2b**. Yields were determined by quantitative GC-FID using pentadecane as internal standard.

## 4. Competition Experiments and Mechanistic studies

### Intermolecular competition of aryl (pseudo-)halides

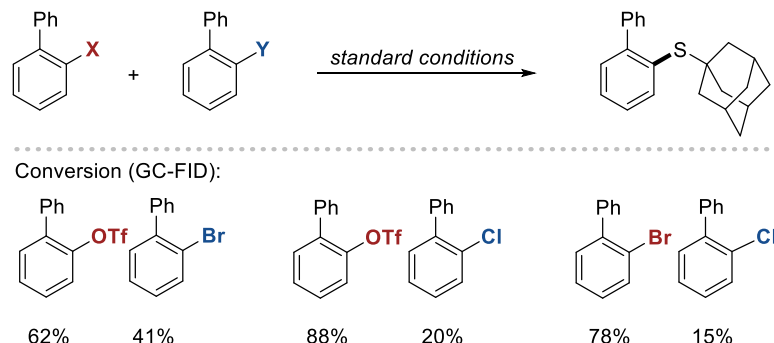

A 25 mL inert, flame-dried and septum-capped Schlenk-tube equipped with a stirring bar was charged with KOAc (21.6 mg, 0.22 mmol, 1.1 equiv.), DPEphos (10.8 mg, 20.0  $\mu\text{mol}$ , 10 mol%) and  $\text{Ni}(\text{cod})_2$  (5.5 mg, 20  $\mu\text{mol}$ , 10 mol%). After addition 1-admantane thiol (35.3 mg, 210  $\mu\text{mol}$ , 1.05 equiv.) and the corresponding aryl (pseudo-)halides (each 0.2 mmol, 1.0 equiv.) the mixture was dissolved in dry THF (2 mL) under stirring. After 4 h at room temperature, the reaction mixture was quenched with brine and diluted with EtOAc. A sample of the organic phase was filtered (glass pipette filled with cotton, celite,  $\text{Al}_2\text{O}_3$  and  $\text{MgSO}_4$ ) and analyzed *via* quantitative GC-FID.

### Intramolecular competition

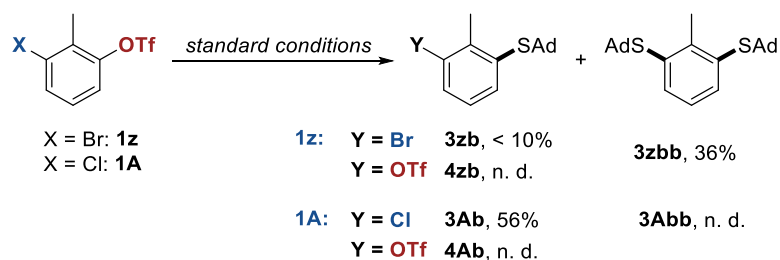

Following GP-B, the corresponding biselectrophile (1 mmol) was subjected to the reaction conditions. Flash chromatography (hexane/EtOAc) gave the corresponding products of the reaction. Side-products were detected by GC-MS.

### Steric vs electronic discrimination

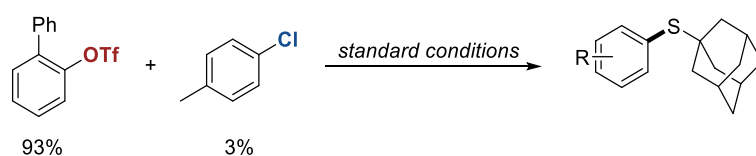

A 25 mL inert, flame-dried and septum-caped Schlenk-tube equipped with a stirring bar was charged with KOAc (21.6 mg, 0.22 mmol, 1.1 equiv.), DPEphos (10.8 mg, 20.0  $\mu$ mol, 10 mol%) and Ni(cod)<sub>2</sub> (5.5 mg, 20  $\mu$ mol, 10 mol%). After addition 1-admantane thiol (35.3 mg, 210  $\mu$ mol, 1.05 equiv.) and the corresponding aryl (pseudo-)halides (each 0.2 mmol, 1.0 equiv.) the mixture was dissolved in dry THF (2 mL) under stirring. After 4 h at room temperature, the reaction mixture was quenched with brine and diluted with EtOAc. A sample of the organic phase was filtered (glass pipette filled with cotton, celite, Al<sub>2</sub>O<sub>3</sub> and MgSO<sub>4</sub>) and analyzed *via* quantitative GC-FID.

### Ni(OAc)<sub>2</sub> as precatalyst under reductive conditions

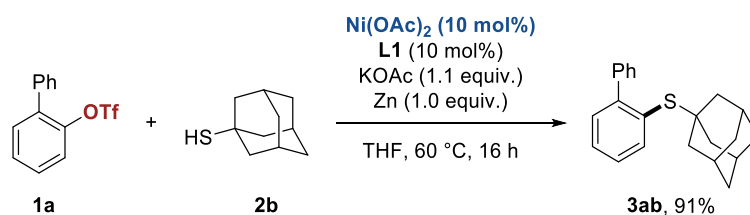

A 25 mL inert, flame-dried and septum-caped Schlenk-tube equipped with a stirring bar was charged with Ni(OAc)<sub>2</sub>(H<sub>2</sub>O)<sub>4</sub> (2.5 mg, 10.0  $\mu$ mol, 10 mol%) and dried *in vacuo* at 110 °C. After the addition of KOAc (10.8 mg, 0.11 mmol, 1.1 equiv.), DPEphos (5.4 mg, 10.0  $\mu$ mol, 10 mol%), zinc powder (6.5 mg, 0.1 mmol, 1.0 equiv.), 1-admantane thiol (**2b**) (17.7 mg, 105  $\mu$ mol, 1.05 equiv.) and 2-biphenyl trifluoromethanesulfonate (**1a**) (30.2 mg, 0.1 mmol, 1.0 equiv.) the mixture was dissolved in dry THF (2 mL) under stirring. After 16 h at 60 °C, the reaction mixture was quenched with brine and diluted with EtOAc. A sample of the organic phase was filtered (glass pipette filled with cotton, celite, Al<sub>2</sub>O<sub>3</sub> and MgSO<sub>4</sub>) and analyzed *via* quantitative GC-FID.

### Ni1 as precatalyst

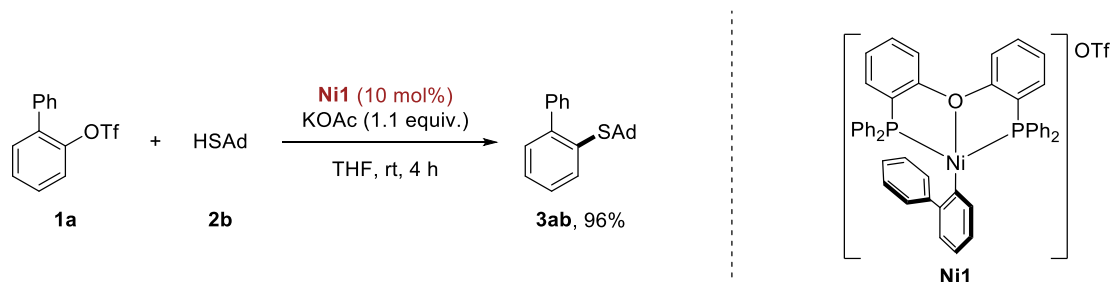

The experiment was performed according to GP-B by using **Ni1** (9.0 mg, 10  $\mu$ mol, 10 mol%) instead of Ni(cod)<sub>2</sub>/DPEphos.

A 25 mL inert, flame-dried and septum-caped Schlenk-tube equipped with a stirring bar was charged with KOAc (10.8 mg, 110  $\mu$ mol, 1.1 equiv.) and **Ni1** (9.0 mg, 10  $\mu$ mol, 10 mol%). After addition 1-admantane thiol (17.7 mg, 105  $\mu$ mol, 1.05 equiv.) and 2-biphenyl

trifluoromethanesulfonate (**1a**) (30.2 mg, 0.1 mmol, 1.0 equiv.) the mixture was dissolved in dry THF (2 mL) under stirring. After 4 h at room temperature, the reaction mixture was quenched with brine and diluted with EtOAc. A sample of the organic phase was filtered (glass pipette filled with cotton, celite, Al<sub>2</sub>O<sub>3</sub> and MgSO<sub>4</sub>) and analyzed *via* quantitative GC-FID.

### Stoichiometric reaction of Ni1 with 1-adamantane thiol (**2b**)

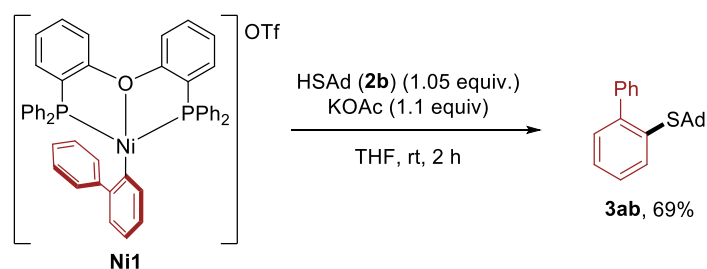

In a glovebox, a screw-cap glass vial was charged with **Ni1** (90.0 mg, 0.1 mmol, 1.0 equiv.), KOAc (10.8 mg, 110  $\mu$ mol, 1.1 equiv.) and 1-adamantane thiol (**2b**) (17.7 mg, 105  $\mu$ mol, 1.05 equiv.). The mixture was dissolved in dry THF and stirred at room temperature for 2 h. Outside the glovebox, the reaction was quenched with brine and diluted with EtOAc. A sample of the organic phase was filtered (glass pipette filled with cotton, celite, Al<sub>2</sub>O<sub>3</sub> and MgSO<sub>4</sub>) and analyzed *via* quantitative GC-FID.

## 5. Analytical Data

### 5.1 Synthesis of Ni1.

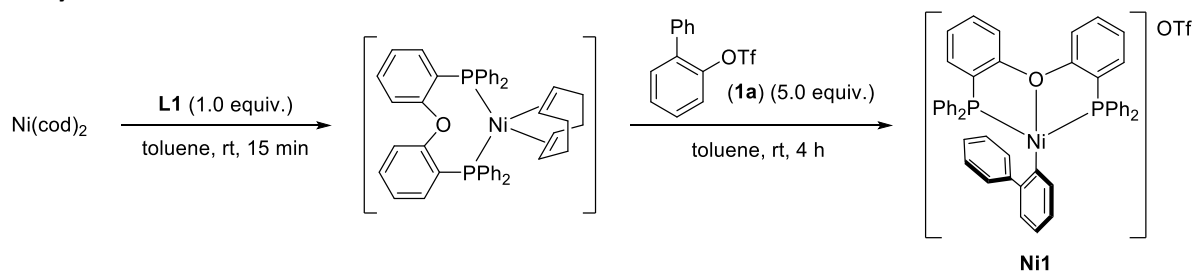

$\text{C}_{49}\text{H}_{37}\text{F}_3\text{NiO}_4\text{P}_2\text{S}$  (899.52 g/mol)

The synthesis of **Ni1** followed a modified literature procedure.<sup>3</sup> In a glovebox, a screw-cap glass vial was charged with  $\text{Ni}(\text{cod})_2$  (100 mg, 364  $\mu\text{mol}$ , 1.0 equiv.), DPEphos (**L1**) (196 mg, 364  $\mu\text{mol}$ , 2.0 equiv.) and a stirring bar. Toluene (4 ml) was added, and the resulting deep red solution was stirred for 15 minutes. Subsequently, 2-biphenyl trifluoromethanesulfonate (**1a**) (549 mg, 1.82 mmol, 5.0 equiv.) dissolved in toluene (3 ml) was added and the reaction mixture was stirred for 4 h until a red precipitate formed. *n*-Hexane (5 ml) was added, and the resulting suspension was filtered through a P3-frit. The red filter cake was washed with toluene (3  $\times$  4 ml) and *n*-hexane (5  $\times$  2 ml). The resulting solid was dried in dynamic vacuum over night to afford **Ni1** (277 mg, 308  $\mu\text{mol}$ , 85%) as an orange powder. Crystals suitable for X-Ray analysis were obtained from a solution of **Ni1** in THF/toluene by slow evaporation of THF.

<sup>1</sup>H-NMR (600 MHz, THF-*d*<sub>8</sub>,  $\delta$ ): 8.51 (d,  $J$  = 7.4 Hz, 2H), 8.06 – 7.92 (m, 2H), 7.85 – 7.79 (m, 2H), 7.71 – 7.41 (m, 15H), 7.37 – 7.32 (m, 2H), 7.25 – 7.21 (m, 4H), 7.09 – 7.06 (m, 1H), 7.04 – 6.99 (m, 2H), 6.87 – 6.82 (m, 5H), 6.75 (d,  $J$  = 7.8 Hz, 1H), 6.60 – 6.54 (m, 1H).

<sup>13</sup>C-NMR (101 MHz, THF-*d*<sub>8</sub>,  $\delta$ ): 159.2 (t,  $J$  = 7.8 Hz), 145.6, 144.1, 138.2, 136.4, 135.9, 135.5, 135.0, 133.9 (t,  $J$  = 6.2 Hz), 133.1 (t,  $J$  = 6.4 Hz), 132.3, 132.2, 130.4 (t,  $J$  = 5.4 Hz), 129.8 (t,  $J$  = 5.4 Hz), 129.5, 128.7, 128.6, 128.0, 127.8, 126.6, 126.3, 125.8, 125.0, 124.8, 121.6, 121.5, 121.4, 118.1.

*Note:* Observed triplets due to secondary effects. Additionally, we were unable to detect the characteristic C–F quartet of the OTf group due to low S/N ratio.

<sup>19</sup>F NMR (565 MHz, THF-*d*<sub>8</sub>,  $\delta$ ): -78.8.

<sup>31</sup>P NMR (243 MHz, THF-*d*<sub>8</sub>,  $\delta$ ): 7.2.

HR-MS (ESI):  $m/z$  calc for  $[\text{M}-\text{OTf}]^+$  749.16676, found 749.16748.

Elemental Analysis: calc: C: 65.43, H: 4.15, S: 3.56; found: C: 65.50, H: 4.37, S: 3.21.

X-Ray: For crystallographic data, see below.



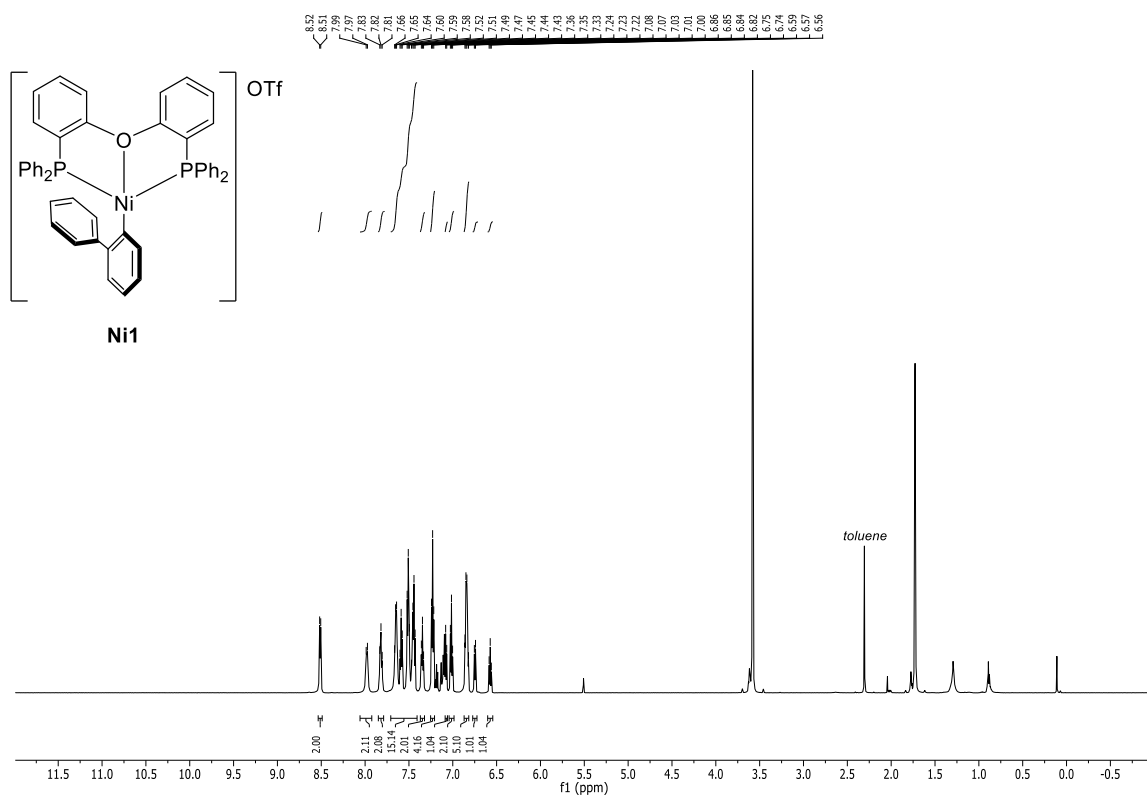

Figure S2.  $^1\text{H-NMR}$ -spectrum (400 MHz,  $\text{THF-d}_8$ ) of **Ni1**.

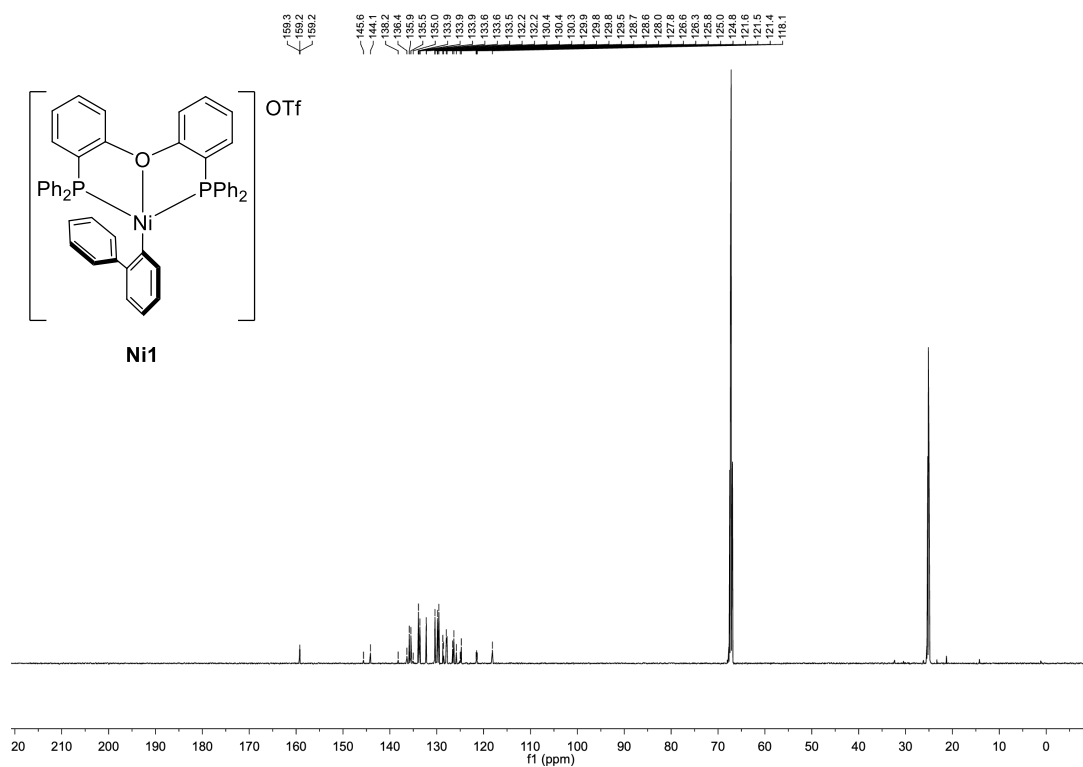

Figure S3.  $^{13}\text{C}$ -NMR-spectrum (101 MHz,  $\text{THF-d}_8$ ) of Ni1.

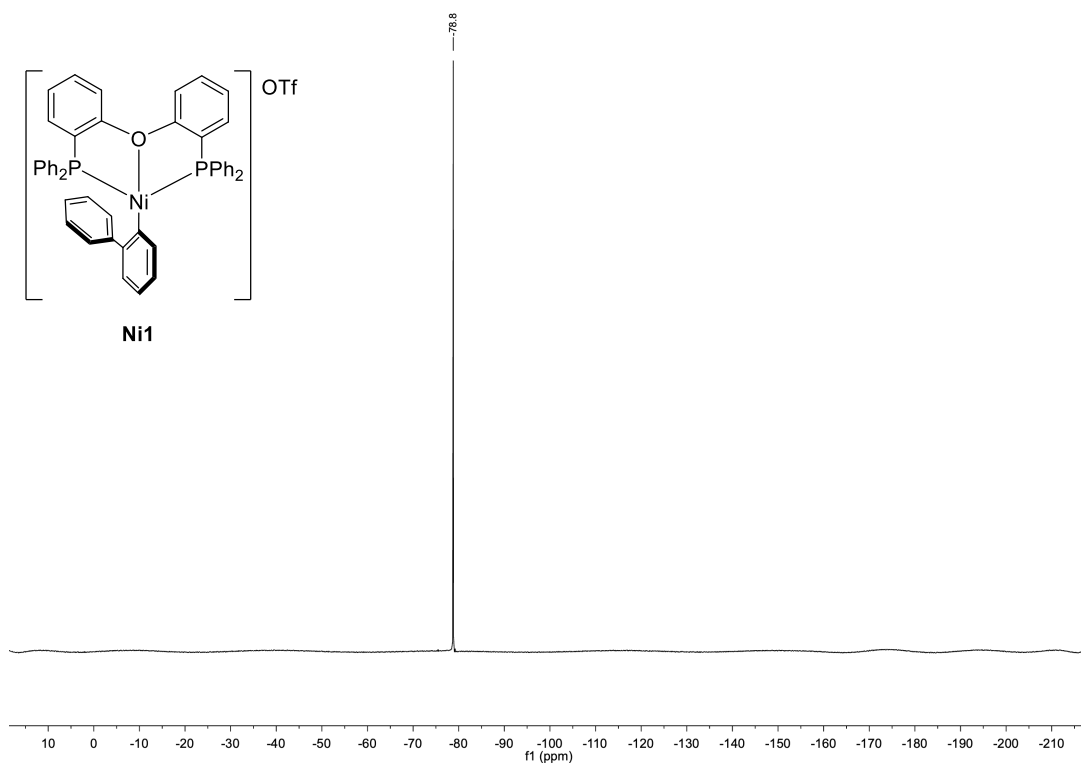

Figure S4.  $^{19}\text{F}$ -NMR-spectrum (376 MHz,  $\text{THF-d}_8$ ) of Ni1.

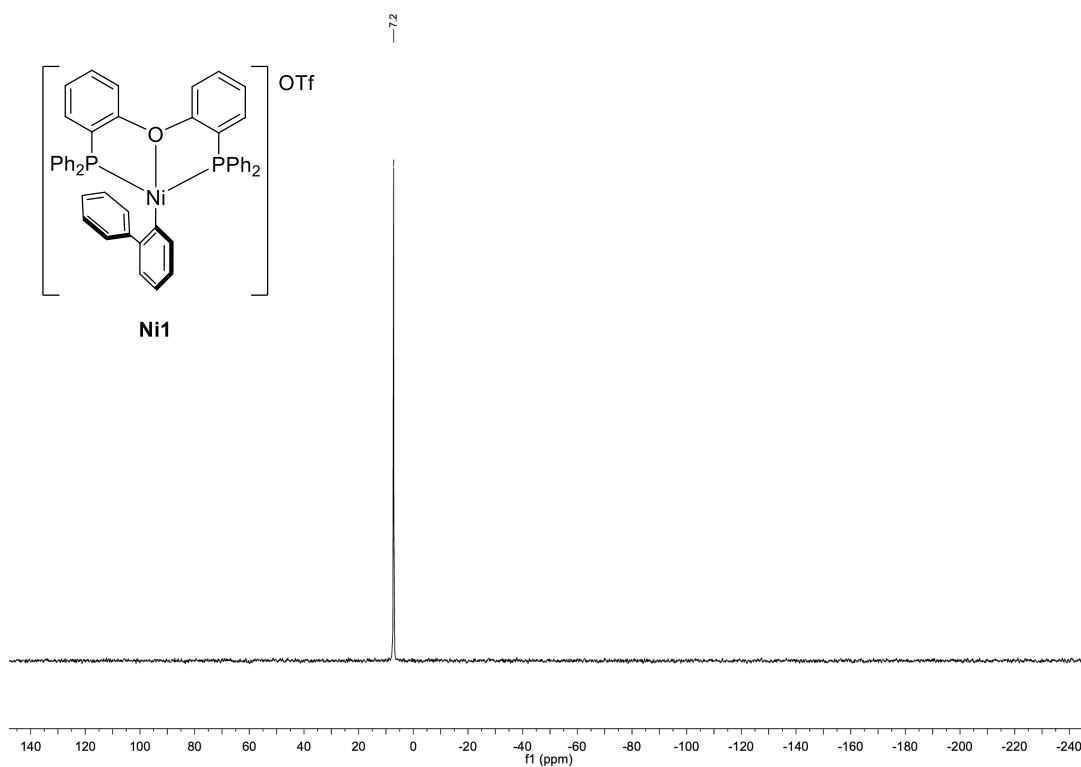

Figure S5.  $^{31}\text{P}$ -NMR-spectrum (243 MHz,  $\text{THF-d}_8$ ) of **Ni1**.

## 5.2 Synthesis of Aryl Triflates

### [1,1'-Biphenyl]-2-yl trifluoromethanesulfonate (**1a**):

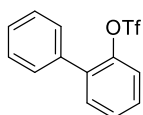

**1a**

$\text{C}_{13}\text{H}_9\text{F}_3\text{O}_3\text{S}$  (302.27 g/mol)

Following **GP-A**, **1a** was synthesized using [1,1'-biphenyl]-2-ol (5.11 g, 30.0 mmol, 1.0 equiv.). Purification by column chromatography ( $\text{SiO}_2$ , *n*-hexane/EtOAc 90:10) afforded **1a** (8.10 g, 26.8 mmol, 89%) as colorless oil. Conforms to reported analytical data.<sup>4</sup>

$R_f$ : 0.66 (*n*-hexane/EtOAc 95:5).

$^1\text{H-NMR}$  (400 MHz,  $\text{CDCl}_3$ ,  $\delta$ ): 7.54 – 7.37 (m, 9H).

$^{13}\text{C-NMR}$  (101 MHz,  $\text{CDCl}_3$ ,  $\delta$ ): 147.0, 135.7, 132.1, 129.5, 129.1, 128.7, 128.6, 128.5, 122.2, 118.5 (q,  $J$  = 320.7 Hz).

$^{19}\text{F-NMR}$  (376 MHz,  $\text{CDCl}_3$ ,  $\delta$ ): -74.1.

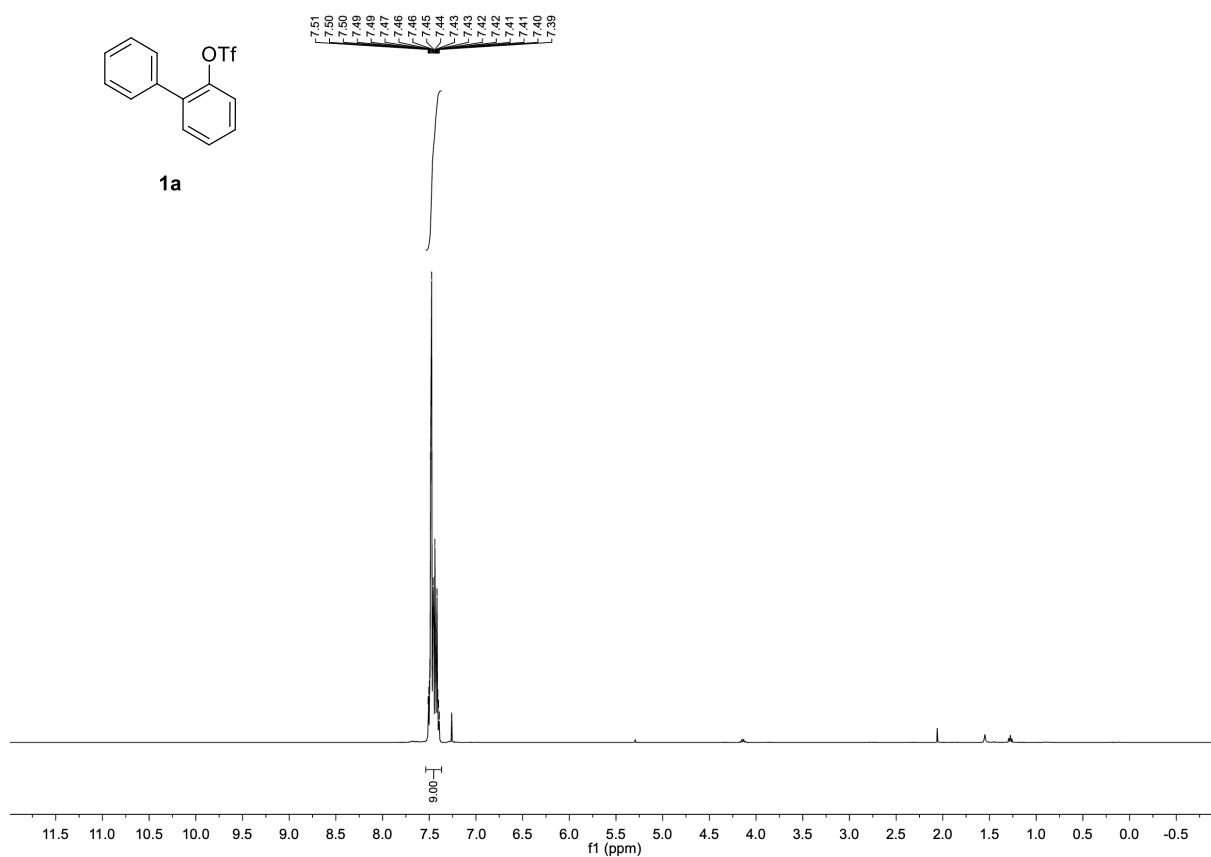

Figure S6. <sup>1</sup>H-NMR-spectrum (400 MHz, CDCl<sub>3</sub>) of **1a**.

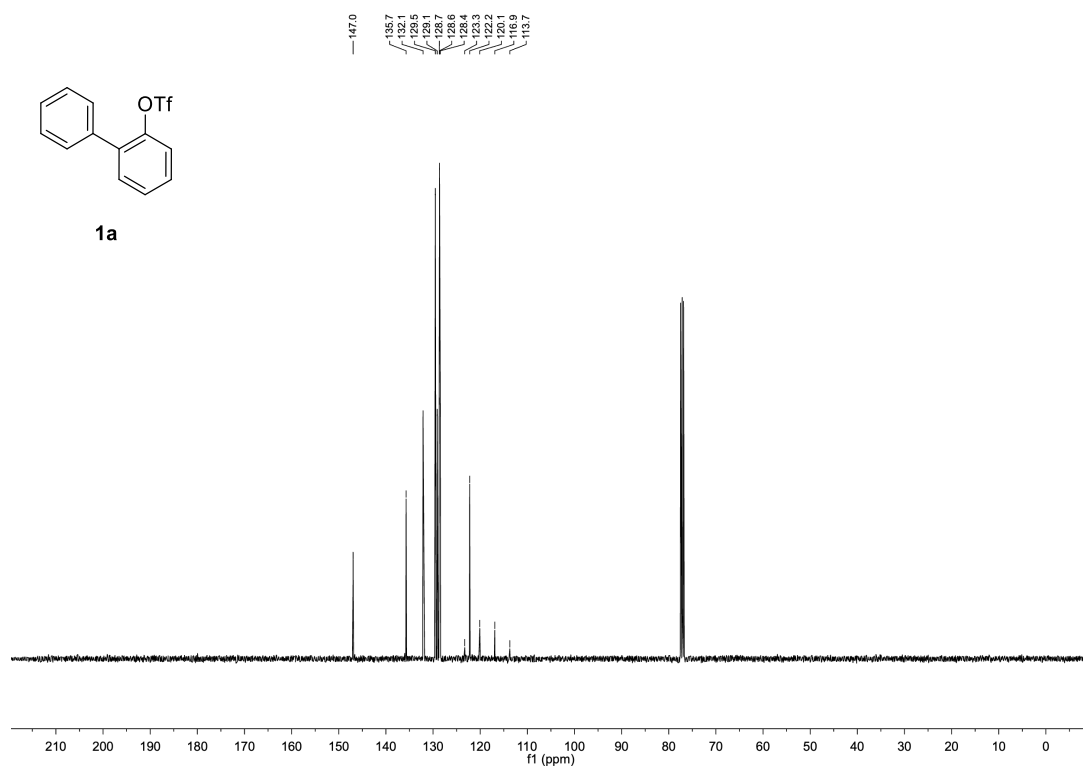

Figure S7. <sup>13</sup>C-NMR-spectrum (101 MHz, CDCl<sub>3</sub>) of **1a**.

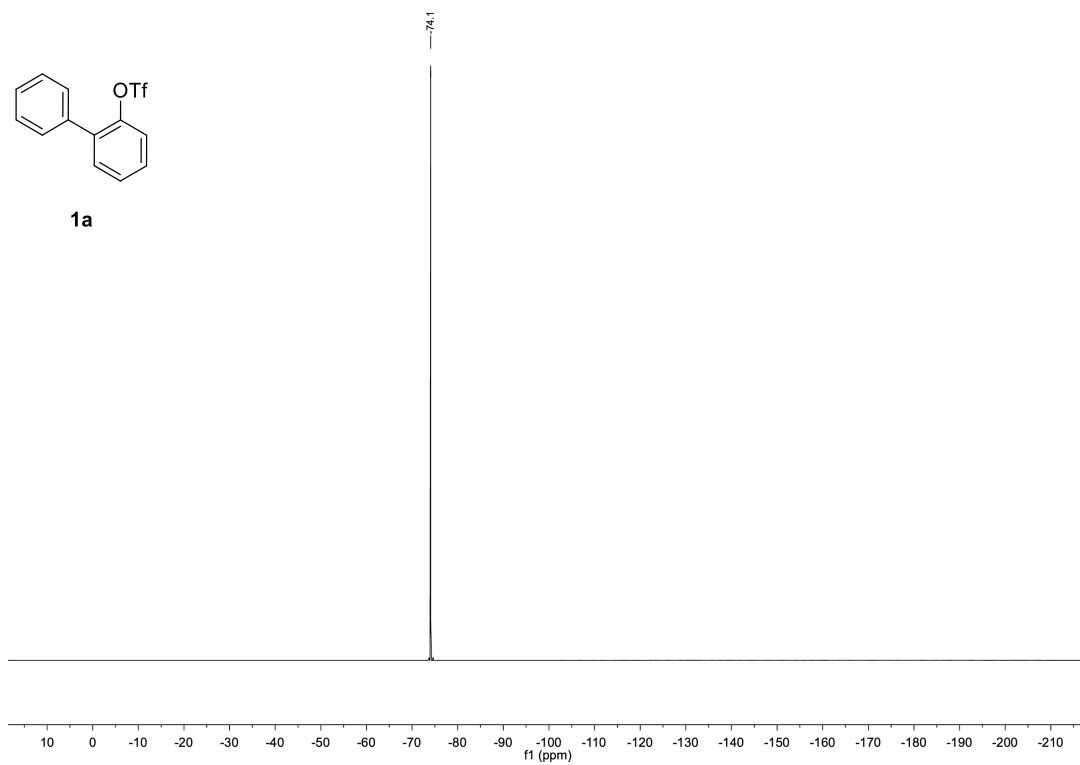

**Figure S8.**  $^{19}\text{F}$ -NMR-spectrum (376 MHz,  $\text{CDCl}_3$ ) of **1a**.

**2-Ethylphenyl trifluoromethanesulfonate (1b):**

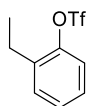

**1b**

C<sub>9</sub>H<sub>9</sub>F<sub>3</sub>O<sub>3</sub>S (254.22 g/mol)

Following **GP-A**, **1b** was synthesized using 2-ethylphenol (1.22 g, 10.0 mmol, 1.0 equiv.). Purification by column chromatography (SiO<sub>2</sub>, *n*-hexane/EtOAc 90:10) afforded **1b** (2.28 g, 8.97 mmol, 90%) as colorless oil. Conforms to reported analytical data.<sup>5</sup>

**R<sub>f</sub>**: 0.72 (*n*-hexane/EtOAc 95:5).

**<sup>1</sup>H-NMR** (400 MHz, CDCl<sub>3</sub>, δ): 7.39 – 7.21 (m, 4H), 2.77 (q, *J* = 7.6 Hz, 2H), 1.28 (t, *J* = 7.6 Hz, 3H).

**<sup>13</sup>C-NMR** (101 MHz, CDCl<sub>3</sub>, δ): 148.1, 136.8, 130.6, 128.6, 127.7, 121.4, 118.8 (q, *J* = 320.1 Hz) 23.1, 14.1.

**<sup>19</sup>F-NMR** (376 MHz, CDCl<sub>3</sub>, δ): -74.0.

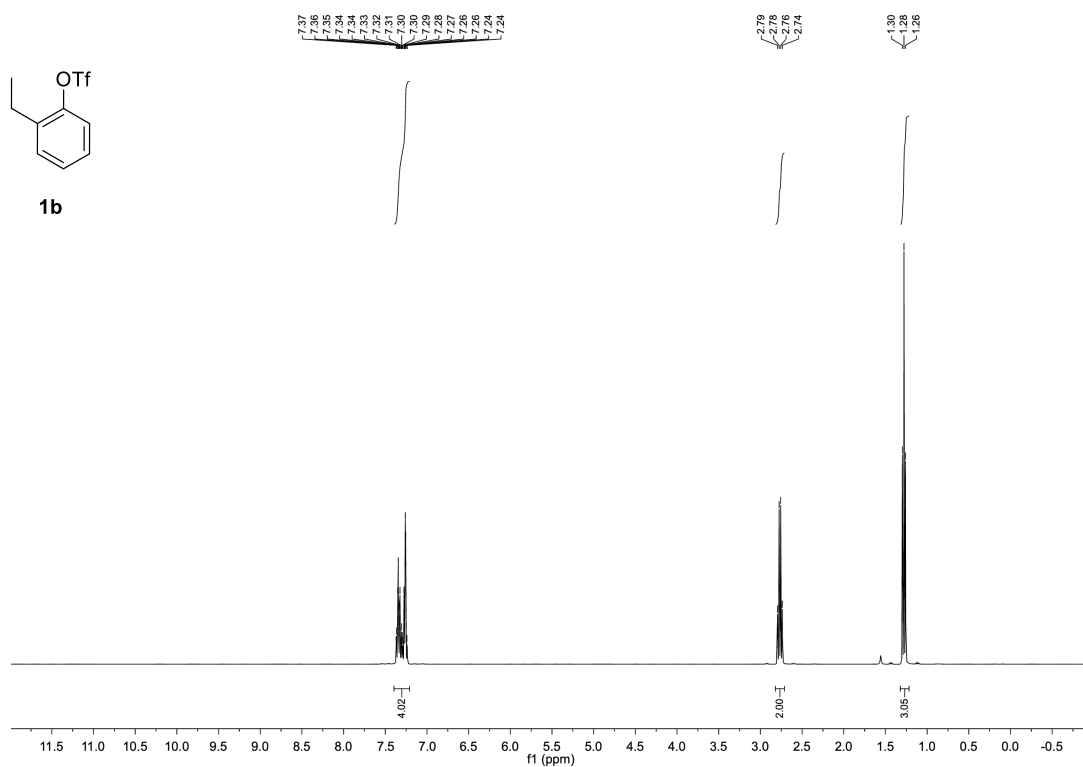

Figure S9.  $^1\text{H-NMR}$ -spectrum (400 MHz,  $\text{CDCl}_3$ ) of **1b**.

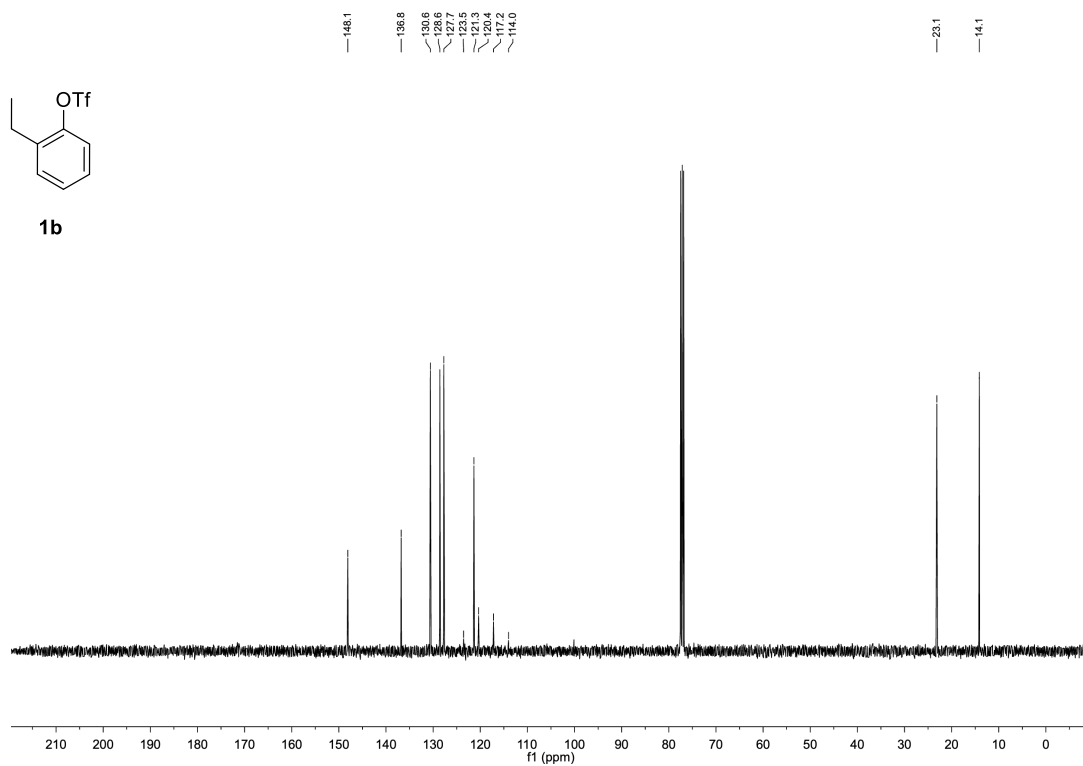

Figure S10.  $^{13}\text{C-NMR}$ -spectrum (101 MHz,  $\text{CDCl}_3$ ) of **1b**.

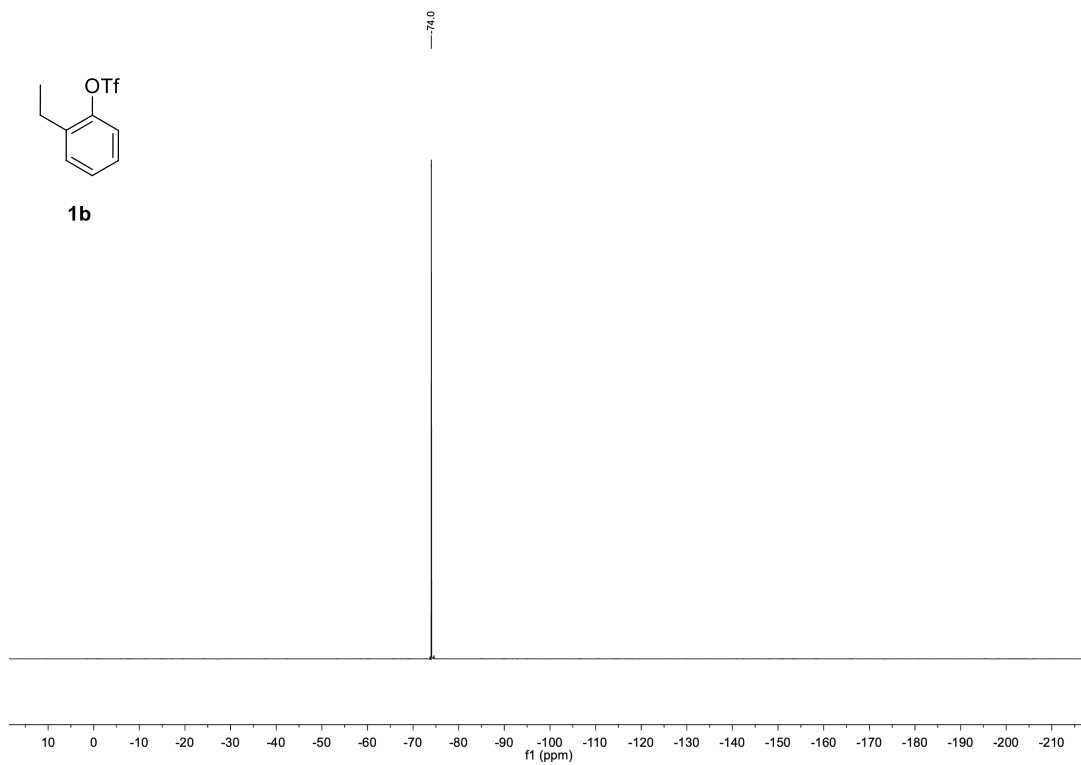

**Figure S11.** <sup>19</sup>F-NMR-spectrum (376 MHz, CDCl<sub>3</sub>) of **1b**.



## 2-Isopropylphenyl trifluoromethanesulfonate (**1c**):

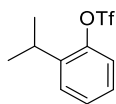

**1c**

$C_{10}H_{11}F_3O_3S$  (268.25 g/mol)

Following **GP-A**, **1c** was synthesized using 2-isopropylphenol (1.36 g, 10.0 mmol, 1.0 equiv.). Purification by column chromatography ( $SiO_2$ , *n*-hexane/EtOAc 90:10) afforded **1c** (2.26 g, 8.42 mmol, 84%) as colorless oil. Conforms to reported analytical data.<sup>4</sup>

**R<sub>f</sub>**: 0.75 (*n*-hexane/EtOAc 95:5).

**<sup>1</sup>H-NMR** (400 MHz,  $CDCl_3$ ,  $\delta$ ): 7.45 – 7.41 (m, 1H), 7.37 (m, 1H), 7.30 – 7.24 (m, 2H), 3.32 (sept,  $J = 6.9$  Hz, 1H), 1.29 (d,  $J = 6.9$  Hz, 6H).

**<sup>13</sup>C-NMR** (101 MHz,  $CDCl_3$ ,  $\delta$ ): 147.3, 141.4, 128.7, 128.0, 127.6, 121.3, 118.8 (q,  $J = 320.1$  Hz) 27.3, 23.3.

**<sup>19</sup>F-NMR** (376 MHz,  $CDCl_3$ ,  $\delta$ ): -74.0.

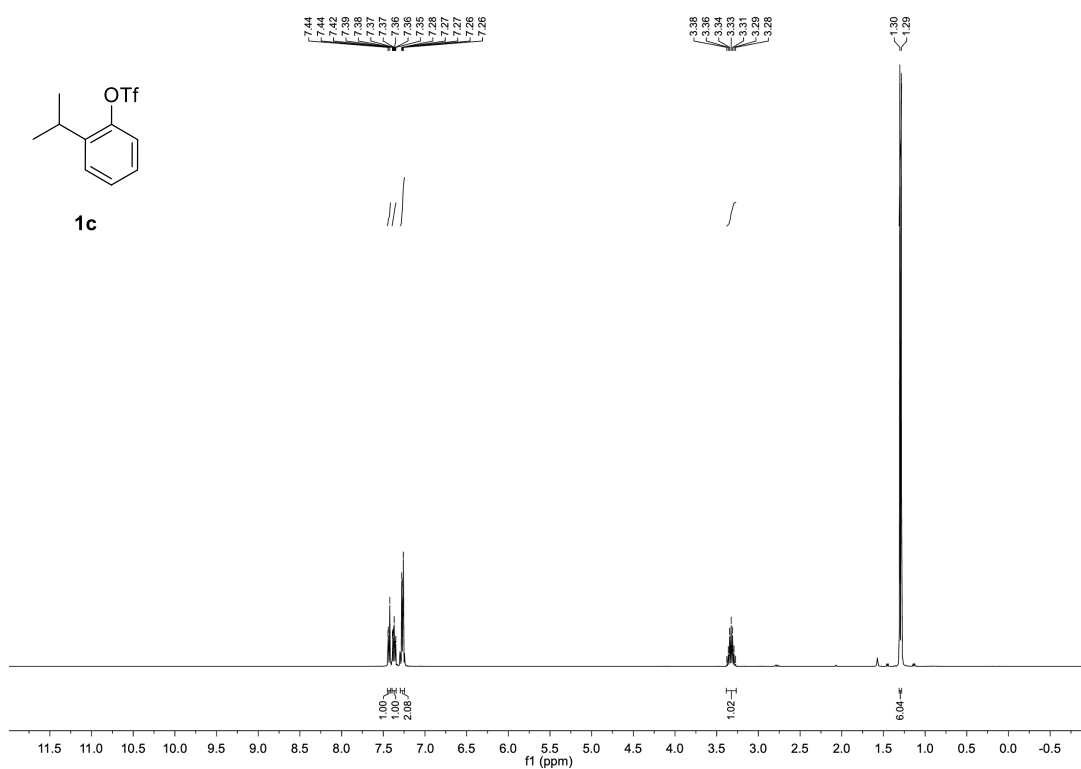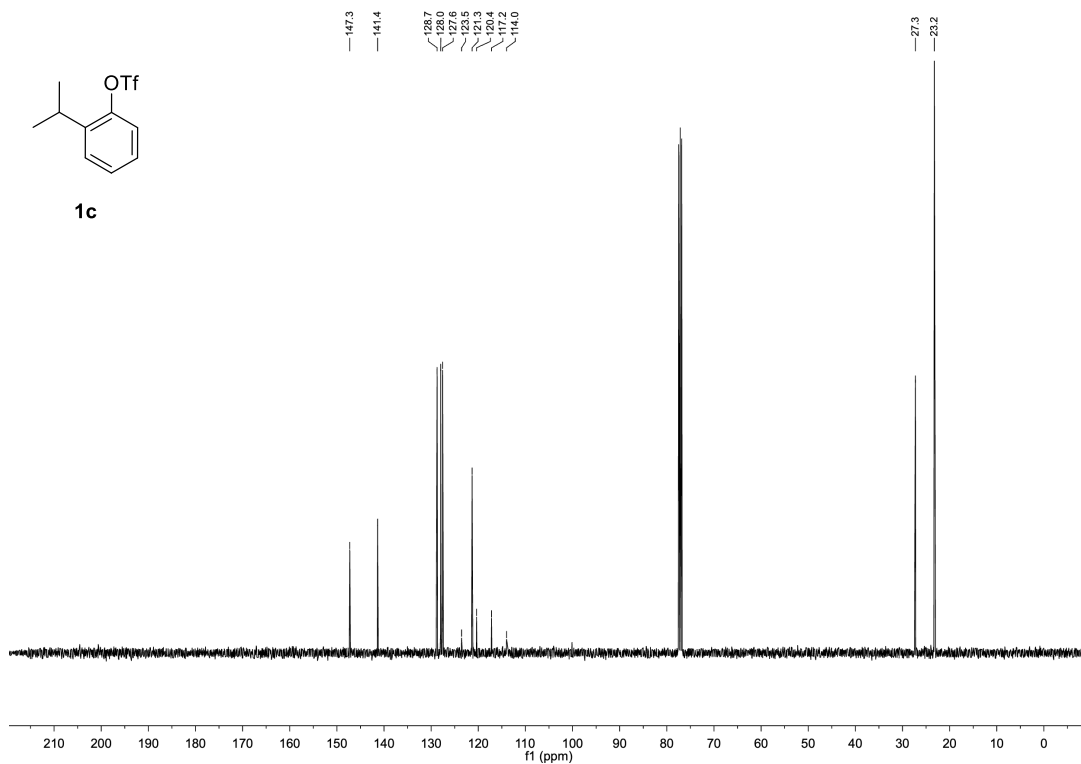

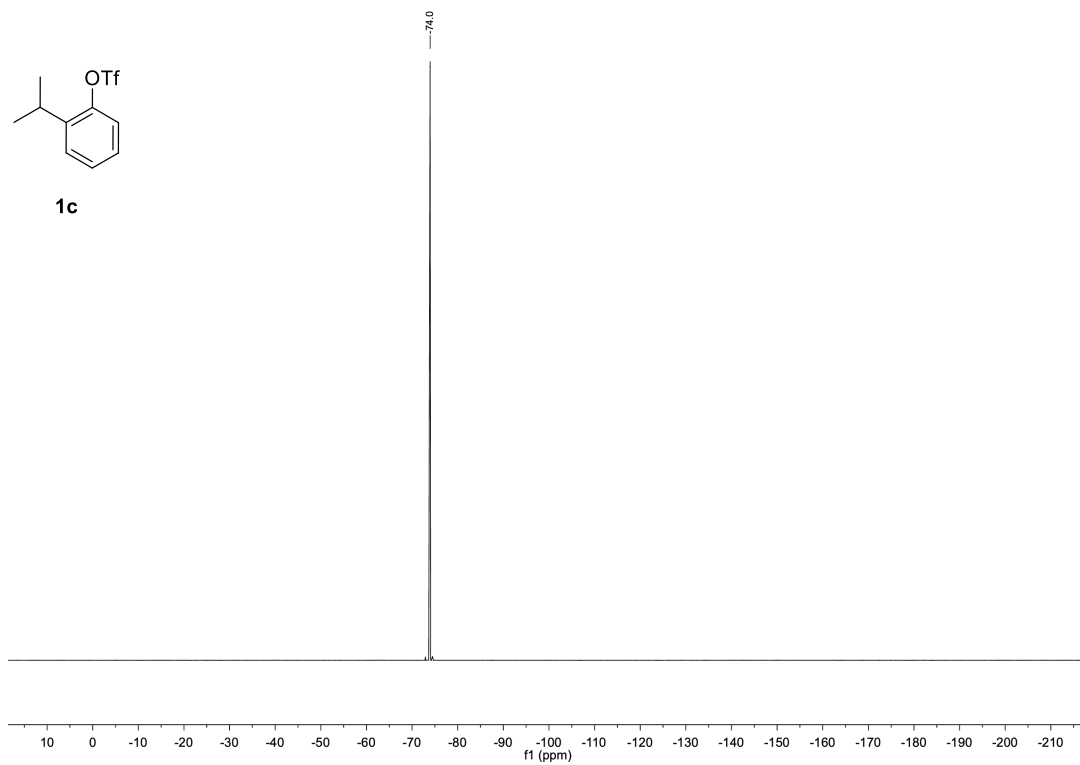

**Figure S14.**  $^{19}\text{F}$ -NMR-spectrum (376 MHz,  $\text{CDCl}_3$ ) of **1c**.

**2-(*tert*-Butyl)phenyl trifluoromethanesulfonate (1d):**

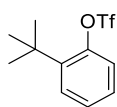

**1d**

$C_{11}H_{13}F_3O_3S$  (282.28 g/mol)

Following **GP-A**, **1d** was synthesized using 2-(*tert*-butyl)phenol (1.50 g, 10.0 mmol, 1.0 equiv.). Purification by column chromatography ( $SiO_2$ , *n*-hexane/EtOAc 95:5) afforded **1d** (2.57 g, 9.10 mmol, 91%) as colorless oil. Conforms to reported analytical data.<sup>6</sup>

**R<sub>f</sub>**: 0.87 (*n*-hexane/EtOAc 95:5).

**<sup>1</sup>H-NMR** (400 MHz,  $CDCl_3$ ,  $\delta$ ): 7.51 – 7.46 (m, 1H), 7.39 – 7.34 (m, 1H), 7.31 – 7.26 (m, 2H), 1.44 (s, 9H).

**<sup>13</sup>C-NMR** (101 MHz,  $CDCl_3$ ,  $\delta$ ): 149.3, 141.6, 128.7, 128.0, 127.8, 121.1, 118.5 (q,  $J = 319.9$  Hz), 34.9, 30.5.

**<sup>19</sup>F-NMR** (376 MHz,  $CDCl_3$ ,  $\delta$ ): -74.2.

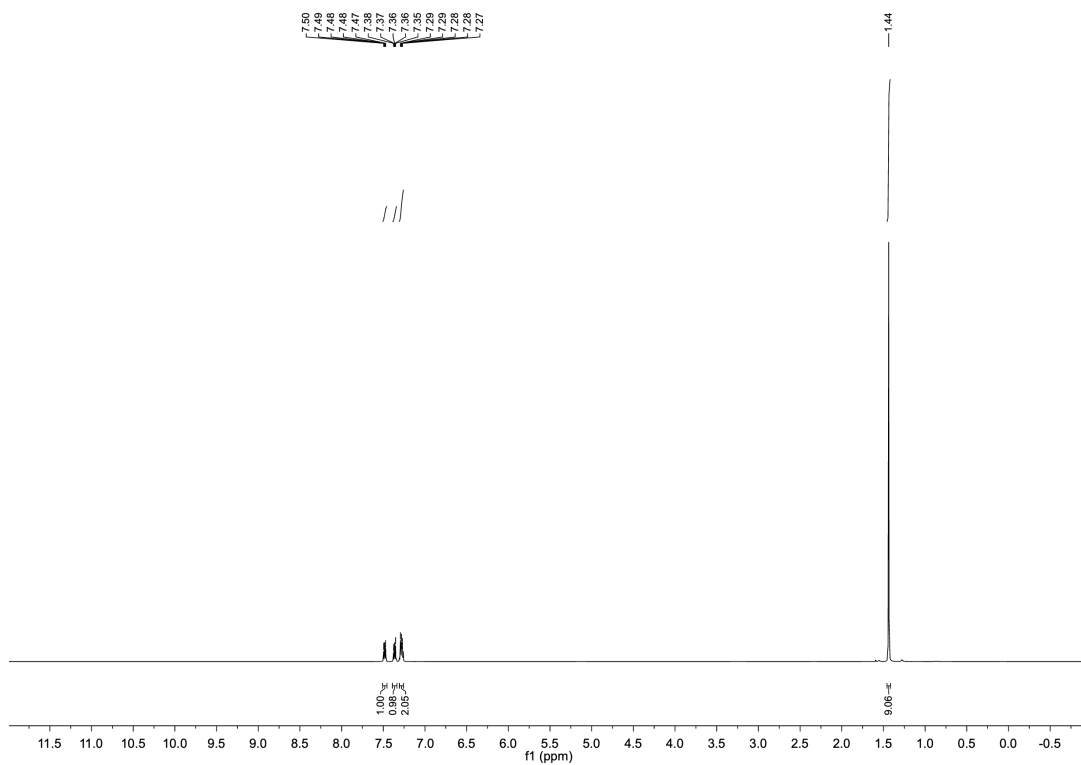

Figure S15.  $^1\text{H}$ -NMR-spectrum (400 MHz,  $\text{CDCl}_3$ ) of **1d**.

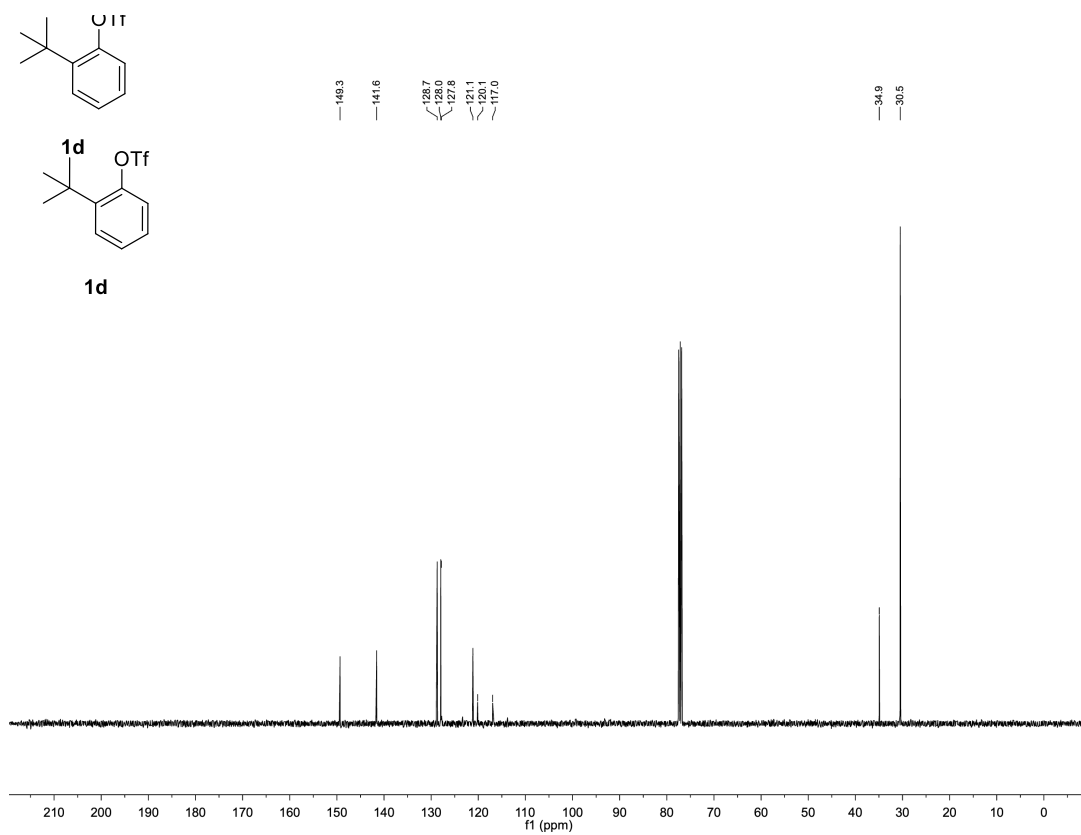

Figure S16.  $^{13}\text{C}$ -NMR-spectrum (101 MHz,  $\text{CDCl}_3$ ) of **1d**.

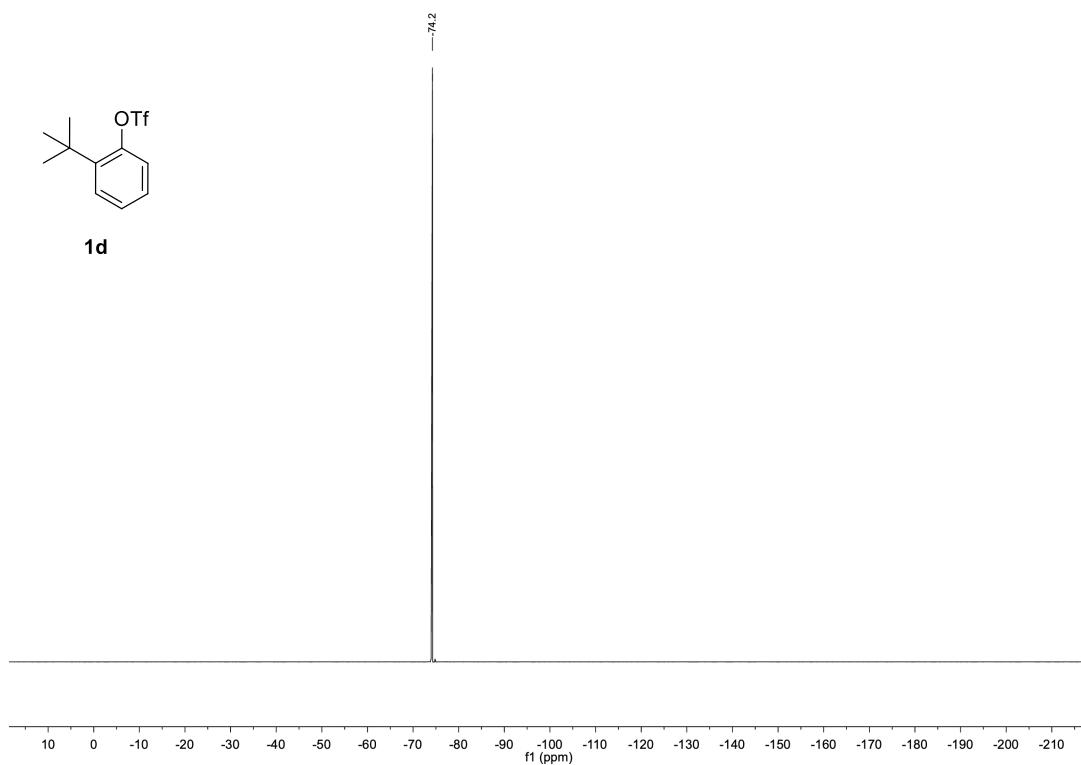

**Figure S17.**  $^{19}\text{F}$ -NMR-spectrum (376 MHz,  $\text{CDCl}_3$ ) of **1d**.

**2-Allylphenyl trifluoromethanesulfonate (1e):**

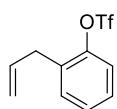

**1e**

$C_{10}H_9F_3O_3S$  (266.23 g/mol)

Following **GP-A**, **1e** was synthesized using 2-allylphenol (1.34 g, 10.0 mmol, 1.0 equiv.). Aqueous work-up afforded **1e** (2.18 g, 8.19 mmol, 82%) as yellow oil, which was used without further purification. Conforms to reported analytical data.<sup>7</sup>

**R<sub>f</sub>**: 0.32 (*n*-hexane).

**<sup>1</sup>H-NMR** (400 MHz, CDCl<sub>3</sub>, δ): 7.41 – 7.27 (m, 4H), 6.02 – 5.88 (m, 1H), 5.22 – 5.11 (m, 2H), 3.52 (d, *J* = 6.6 Hz, 2H).

**<sup>13</sup>C-NMR** (101 MHz, CDCl<sub>3</sub>, δ): 148.1, 134.7, 133.0, 131.5, 128.5, 128.3, 121.5, 118.8 (q, *J* = 319.8 Hz), 117.5, 34.1.

**<sup>19</sup>F-NMR** (376 MHz, CDCl<sub>3</sub>, δ): -74.0.





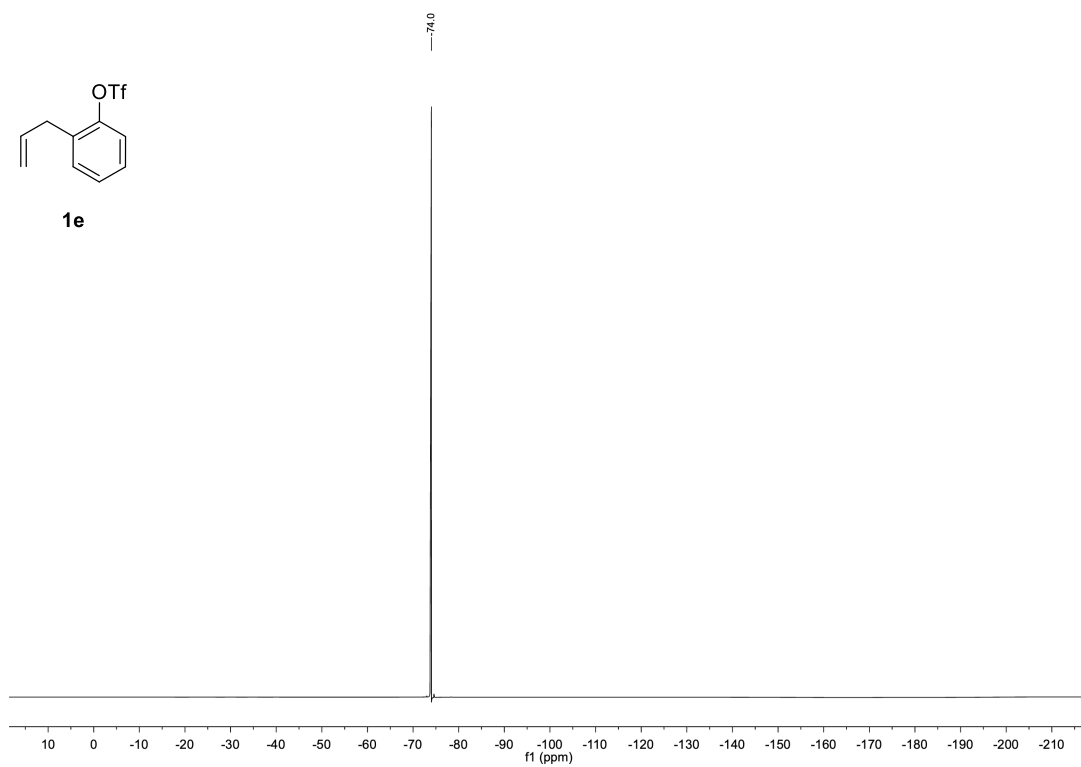

**Figure S20.**  $^{19}\text{F}$ -NMR-spectrum (376 MHz,  $\text{CDCl}_3$ ) of **1e**.

**4-Acetyl-2,6-dimethylphenyl trifluoromethanesulfonate (1f):**

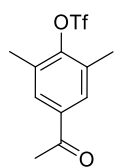

**1f**

$C_{11}H_{11}F_3O_4S$  (296.26 g/mol)

Following **GP-A**, **1f** was synthesized using 3,5-dimethyl-4-hydroxyacetophenone (1.64 g, 10.0 mmol, 1.0 equiv.). Purification by column chromatography ( $SiO_2$ , *n*-hexane/EtOAc 90:10) afforded **1f** (2.66 g, 8.99 mmol, 90%) as a pale yellow solid. Conforms to reported analytical data.<sup>8</sup>

**R<sub>f</sub>**: 0.33 (*n*-hexane/EtOAc 90:10).

**<sup>1</sup>H-NMR** (400 MHz,  $CDCl_3$ ,  $\delta$ ): 7.71 (s, 2H), 2.58 (s, 3H), 2.44 (s, 6H).

**<sup>13</sup>C-NMR** (101 MHz,  $CDCl_3$ ,  $\delta$ ): 196.9, 149.9, 136.4, 132.3, 130.1, 118.7 (q,  $J = 320.0$  Hz), 26.8, 17.4.

**<sup>19</sup>F-NMR** (376 MHz,  $CDCl_3$ ,  $\delta$ ): -73.3.

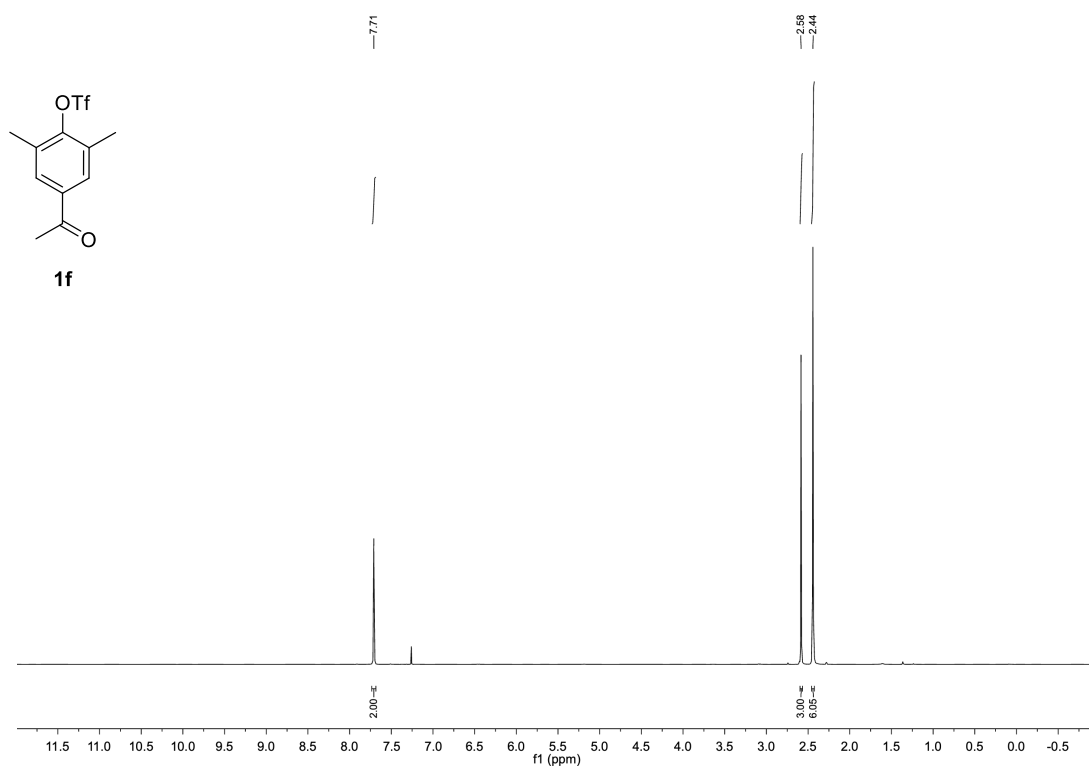

Figure S21.  $^1\text{H-NMR}$ -spectrum (400 MHz,  $\text{CDCl}_3$ ) of **1f**.

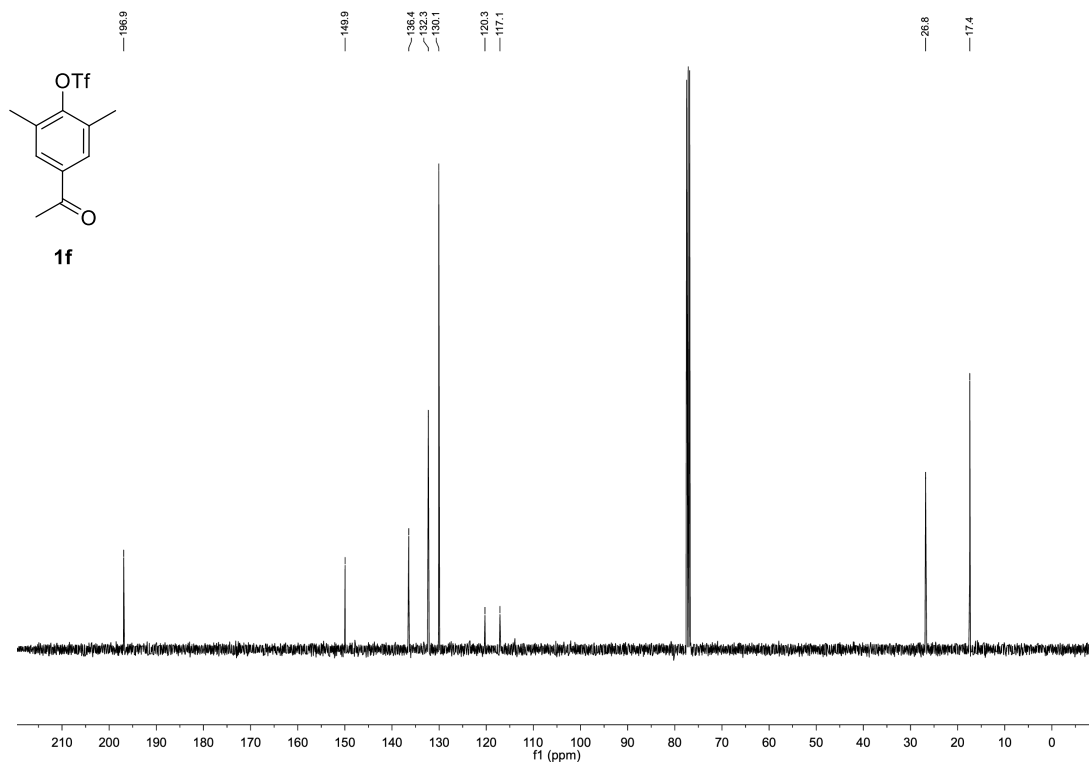

Figure S22.  $^{13}\text{C-NMR}$ -spectrum (101 MHz,  $\text{CDCl}_3$ ) of **1f**.

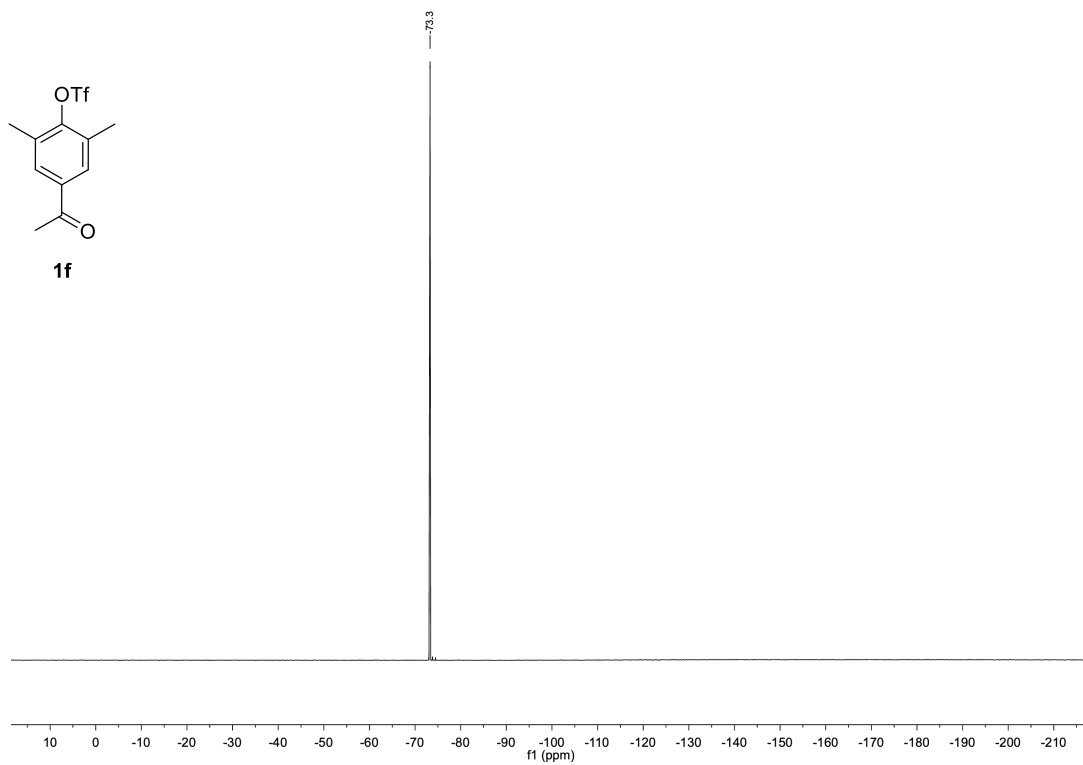

**Figure S23.**  $^{19}\text{F}$ -NMR-spectrum (376 MHz,  $\text{CDCl}_3$ ) of **1f**.

**1,2-Phenylene bis(trifluoromethanesulfonate) (1g):**

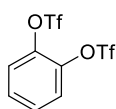

**1g**

$C_8H_4F_6O_6S_2$  (374.22 g/mol)

Following **GP-A**, **1g** was synthesized using catechol (1.10 g, 10.0 mmol, 1.0 equiv.), pyridine (4.75 g, 60.0 mmol, 6.0 equiv.) and trifluoromethanesulfonic anhydride (6.21g, 22.0 mmol, 2.2 equiv.). Purification by column chromatography (SiO<sub>2</sub>, *n*-hexane/EtOAc 90:10) afforded **1g** (1.75 g, 4.68 mmol, 47%) as colorless oil. Conforms to reported analytical data.<sup>9</sup>

**R<sub>f</sub>**: 0.43 (*n*-hexane/EtOAc 95:5).

**<sup>1</sup>H-NMR** (400 MHz, CDCl<sub>3</sub>, δ): 7.49 (s, 4H).

**<sup>13</sup>C-NMR** (101 MHz, CDCl<sub>3</sub>, δ): 140.7, 129.8, 123.9, 118.7 (q, *J* = 320.7 Hz).

**<sup>19</sup>F-NMR** (376 MHz, CDCl<sub>3</sub>, δ): -73.2.

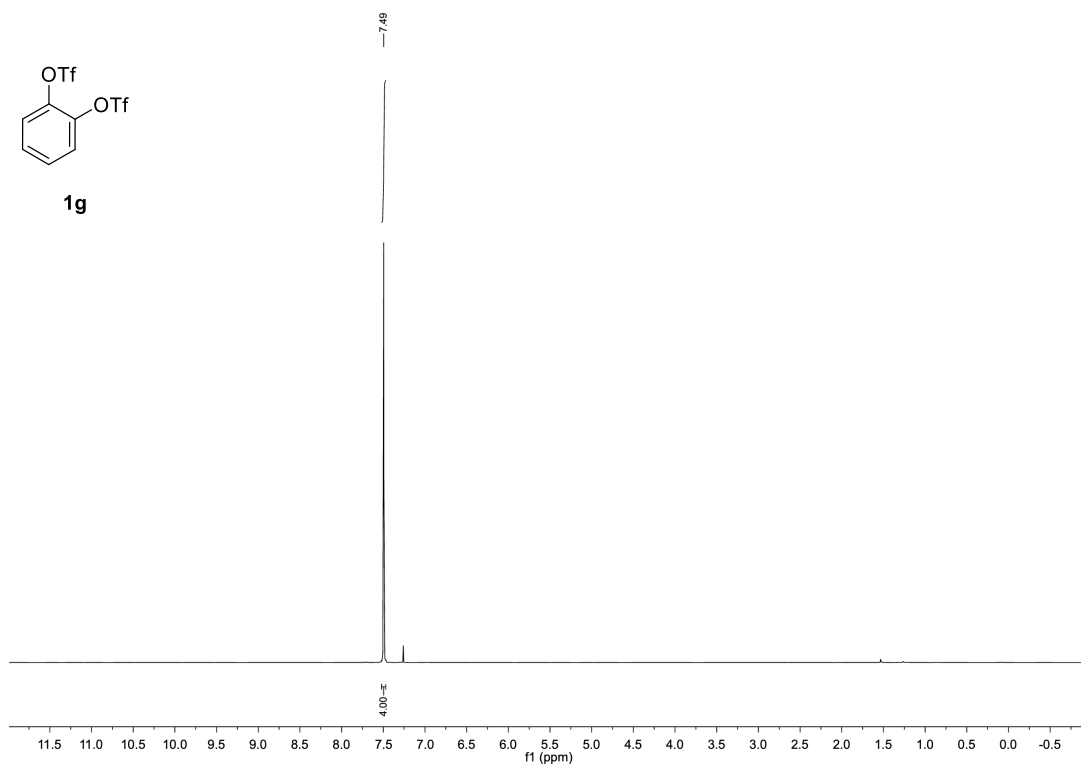

Figure S24. <sup>1</sup>H-NMR-spectrum (400 MHz, CDCl<sub>3</sub>) of **1g**.

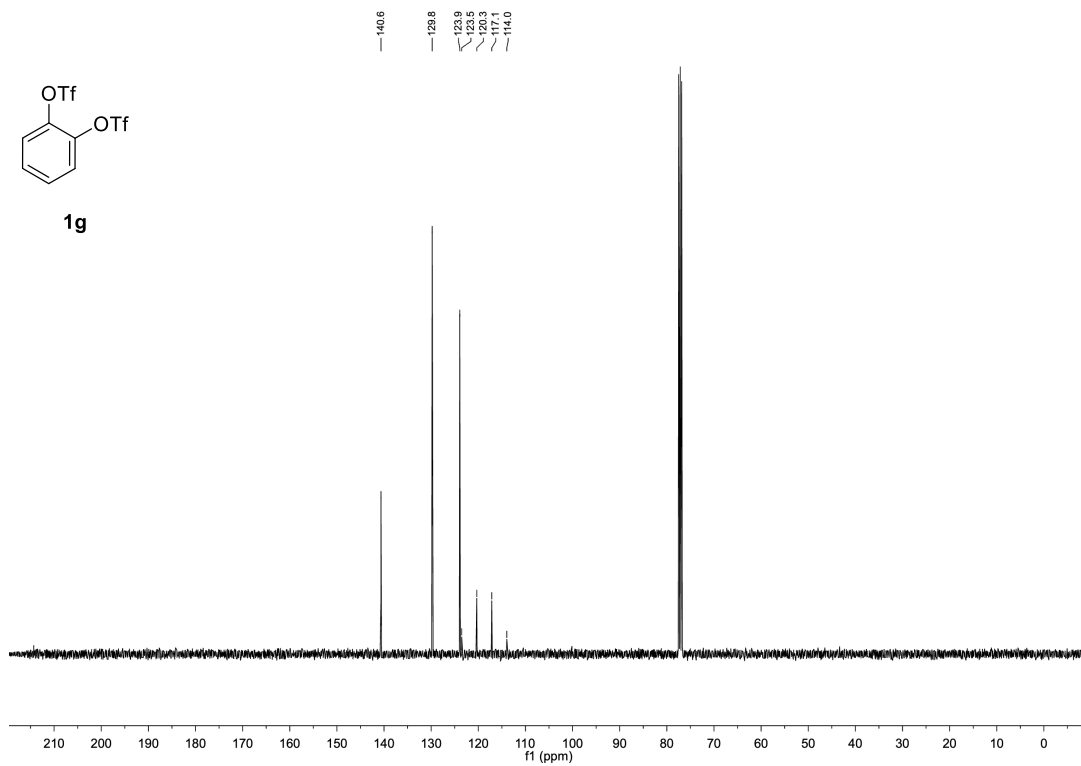

Figure S25. <sup>13</sup>C-NMR-spectrum (101 MHz, CDCl<sub>3</sub>) of **1g**.

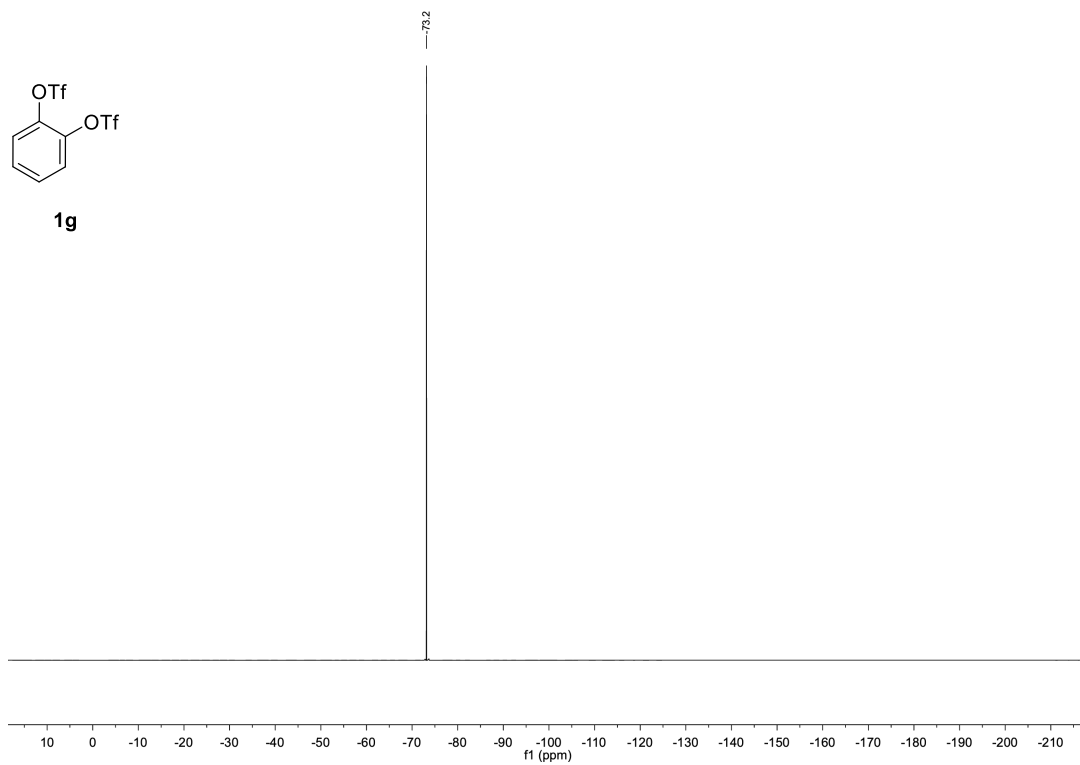

**Figure S26.**  $^{19}\text{F}$ -NMR-spectrum (376 MHz,  $\text{CDCl}_3$ ) of **1g**.

**2-(Trifluoromethyl)phenyl trifluoromethanesulfonate (1h):**

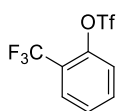

**1h**

$C_8H_4F_6O_3S$  (294.17 g/mol)

Following **GP-A**, **1h** was synthesized using 2-(trifluoromethyl)phenol (1.62 g, 10.0 mmol, 1.0 equiv.). Purification by column chromatography ( $SiO_2$ , *n*-hexane/EtOAc 90:10) afforded **1h** (1.71 g, 5.81 mmol, 58%) as a colorless oil. Conforms to reported analytical data.<sup>10</sup>

**R<sub>f</sub>**: 0.58 (*n*-hexane/EtOAc 95:5).

**<sup>1</sup>H-NMR** (400 MHz,  $CDCl_3$ ,  $\delta$ ): 7.80 – 7.74 (m, 1H), 7.71 – 7.63 (m, 1H), 7.56 – 7.46 (m, 2H).

**<sup>13</sup>C-NMR** (101 MHz,  $CDCl_3$ ,  $\delta$ ): 146.3 (q,  $J = 1.9$  Hz), 134.1, 128.2 (q,  $J = 4.8$  Hz), 123.2, 122.5, 122.2 (q,  $J = 273.1$  Hz), 118.6 (q,  $J = 320.2$  Hz).

**<sup>19</sup>F-NMR** (376 MHz,  $CDCl_3$ ,  $\delta$ ): -60.9, -73.7.



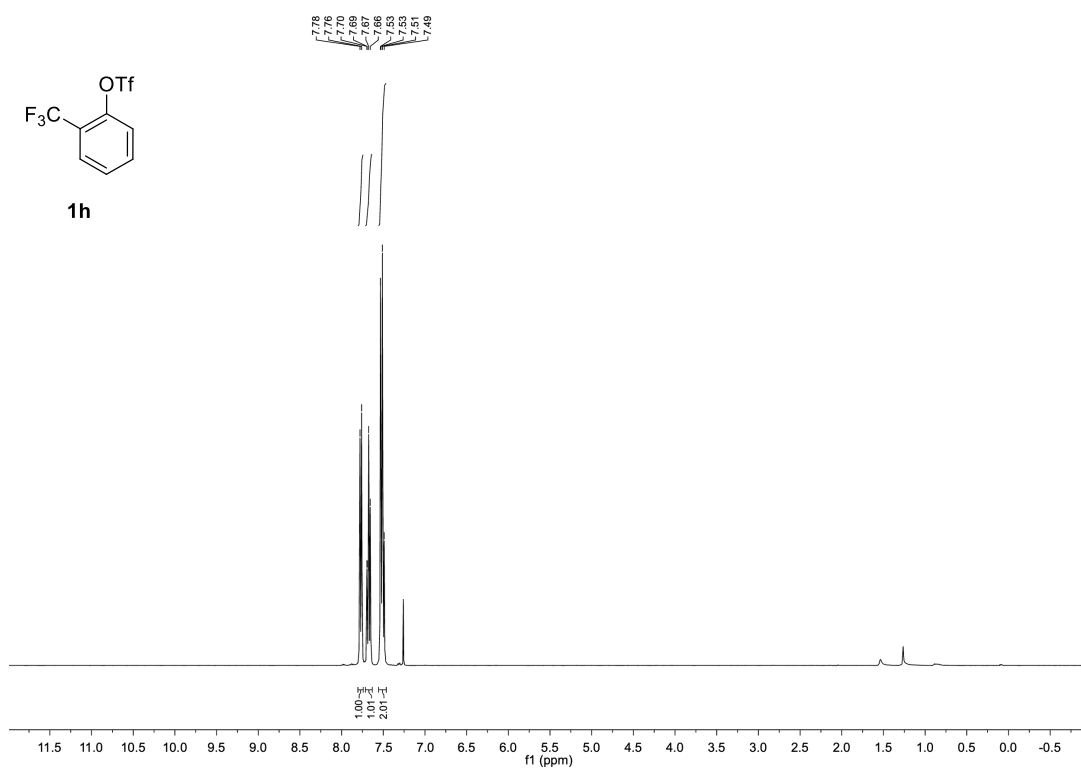

Figure S27. <sup>1</sup>H-NMR-spectrum (400 MHz, CDCl<sub>3</sub>) of **1h**.

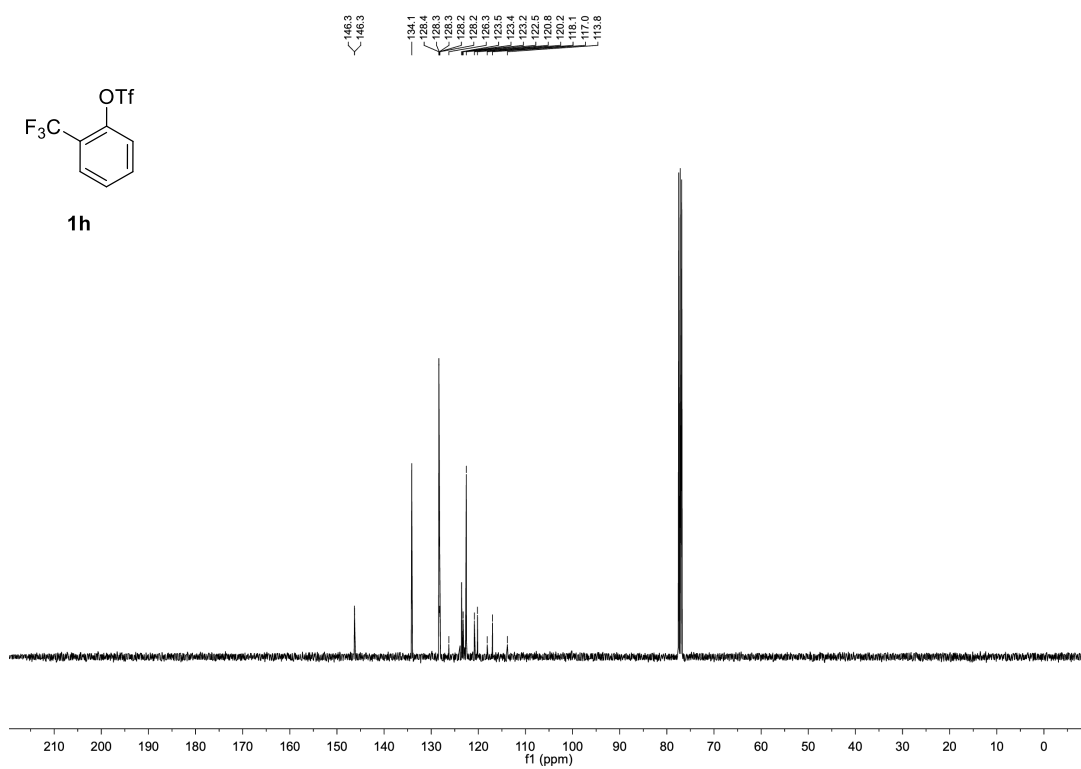

Figure S28. <sup>13</sup>C-NMR-spectrum (101 MHz, CDCl<sub>3</sub>) of **1h**.

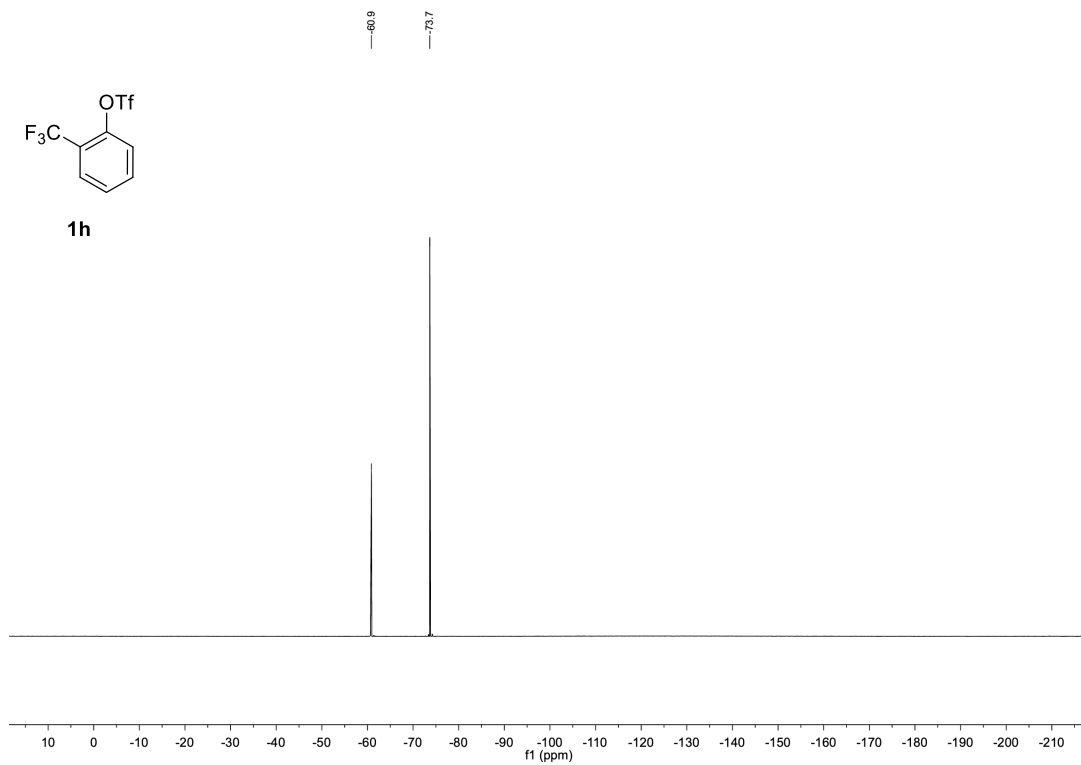

**Figure S29.**  $^{19}\text{F}$ -NMR-spectrum (376 MHz,  $\text{CDCl}_3$ ) of **1h**.

**2-Cyanophenyl trifluoromethanesulfonate (1i):**

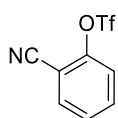

**1i**

$C_8H_4F_3NO_3S$  (251.18 g/mol)

Following **GP-A**, **1i** was synthesized using 2-hydroxybenzonitrile (1.19 g, 10.0 mmol, 1.0 equiv.). Purification by column chromatography ( $SiO_2$ , *n*-hexane/EtOAc 80:20) afforded **1i** (2.22 g, 8.84 mmol, 88%) as colorless oil. Conforms to reported analytical data.<sup>11</sup>

**R<sub>f</sub>**: 0.91 (*n*-hexane/EtOAc 90:10).

**<sup>1</sup>H-NMR** (400 MHz,  $CDCl_3$ ,  $\delta$ ): 7.82 – 7.68 (m, 2H), 7.58 – 7.46 (m, 2H).

**<sup>13</sup>C-NMR** (101 MHz,  $CDCl_3$ ,  $\delta$ ): 149.8, 134.9, 134.6, 128.9, 122.8, 118.7 (q,  $J = 320.8$  Hz), 113.6, 107.5.

**<sup>19</sup>F-NMR** (376 MHz,  $CDCl_3$ ,  $\delta$ ): -72.7.

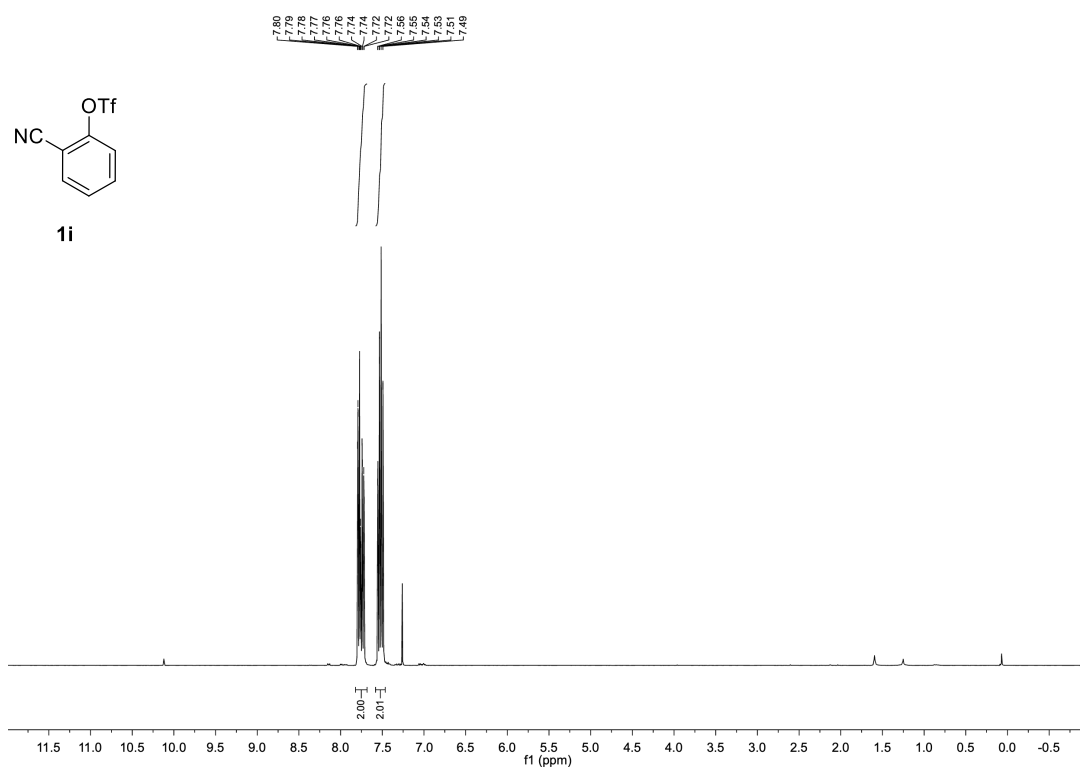

Figure S30. <sup>1</sup>H-NMR-spectrum (400 MHz, CDCl<sub>3</sub>) of **1i**.

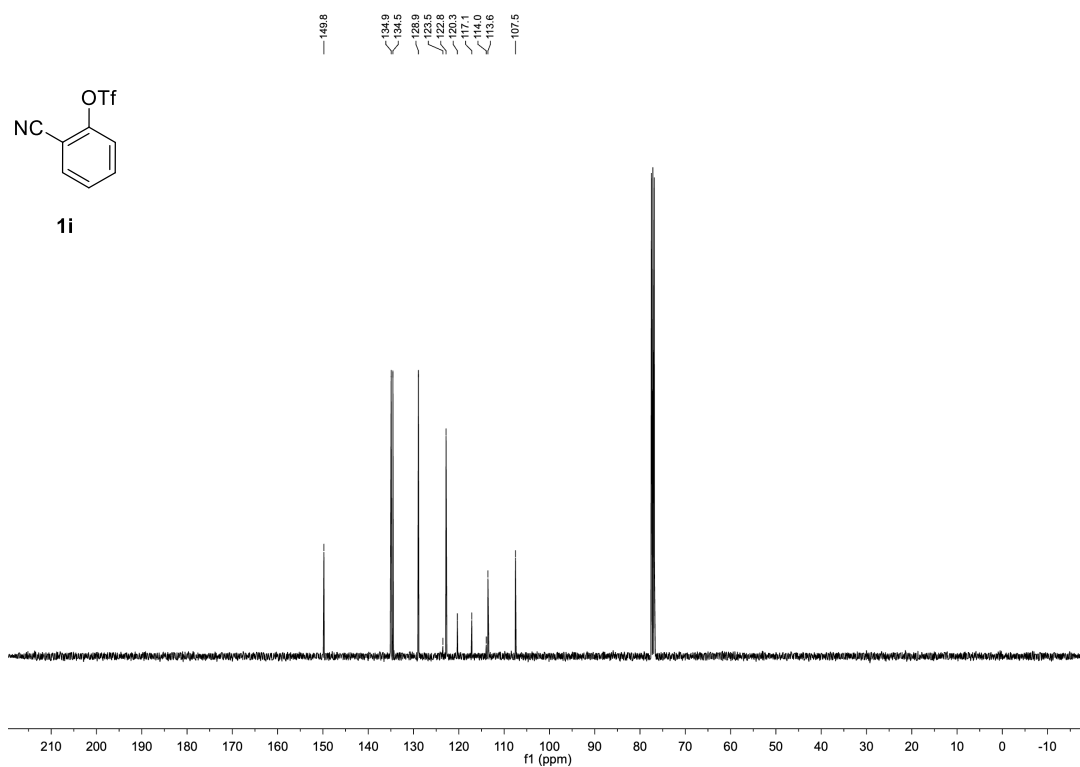

Figure S31. <sup>13</sup>C-NMR-spectrum (101 MHz, CDCl<sub>3</sub>) of **1i**.

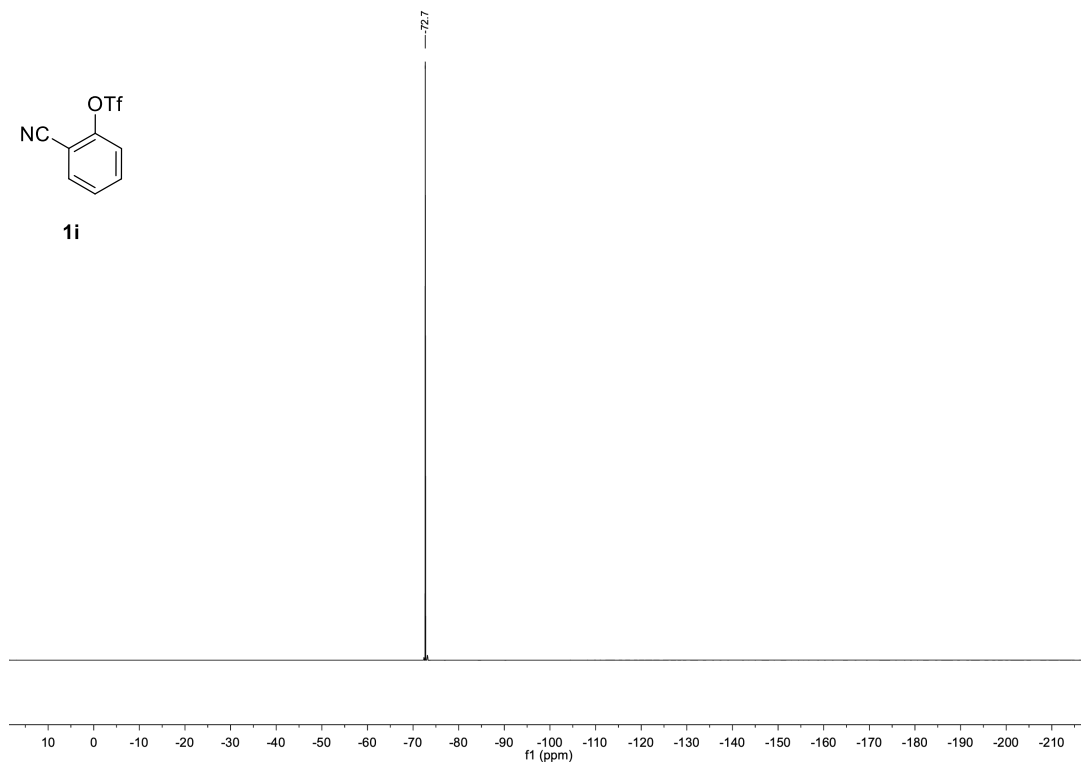

**Figure S32.** <sup>19</sup>F-NMR-spectrum (376 MHz, CDCl<sub>3</sub>) of **1i**.

**2-Chlorophenyl trifluoromethanesulfonate (1j):**

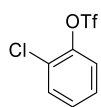

**1j**

$C_7H_4ClF_3O_3S$  (260.61 g/mol)

Following **GP-A**, **1j** was synthesized using 2-chlorophenol (1.29 g, 10.0 mmol, 1.0 equiv.). Purification by column chromatography ( $SiO_2$ , *n*-hexane/EtOAc 90:10) afforded **1j** (2.23 g, 8.56 mmol, 86%) as colorless oil. Conforms to reported analytical data.<sup>12</sup>

**R<sub>f</sub>**: 0.68 (*n*-hexane/EtOAc 90:10).

**<sup>1</sup>H-NMR** (400 MHz,  $CDCl_3$ ,  $\delta$ ): 7.56 – 7.50 (m, 1H), 7.38 – 7.31 (m, 3H).

**<sup>13</sup>C-NMR** (101 MHz,  $CDCl_3$ ,  $\delta$ ): 145.9, 131.5, 129.4, 128.5, 127.4, 123.2, 118.8 (q,  $J = 320.5$  Hz).

**<sup>19</sup>F-NMR** (376 MHz,  $CDCl_3$ ,  $\delta$ ): -73.5.

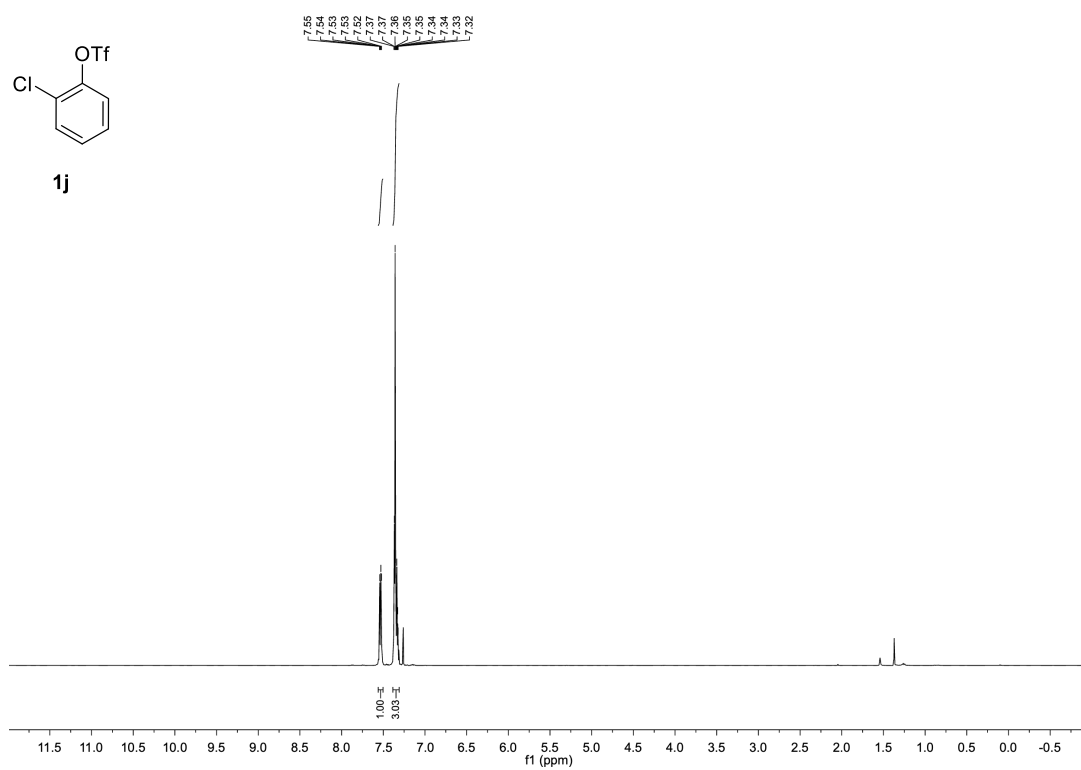

Figure S33.  $^1\text{H}$ -NMR-spectrum (400 MHz,  $\text{CDCl}_3$ ) of **1j**.

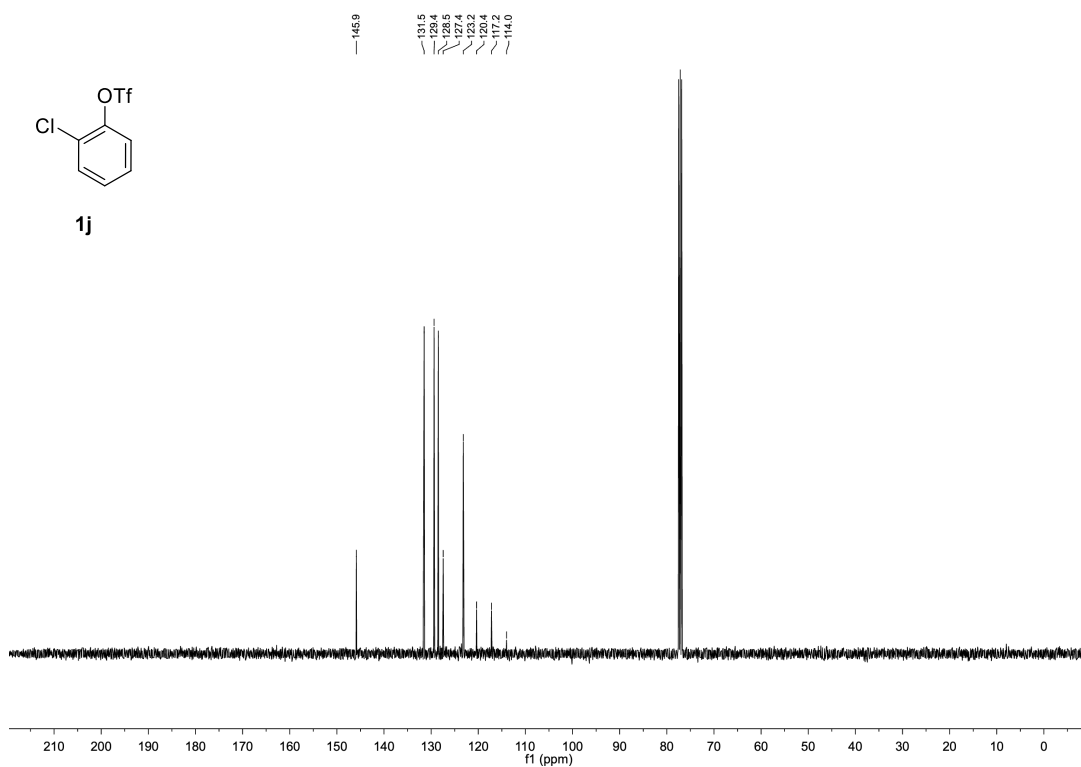

Figure S34.  $^{13}\text{C}$ -NMR-spectrum (101 MHz,  $\text{CDCl}_3$ ) of **1j**.

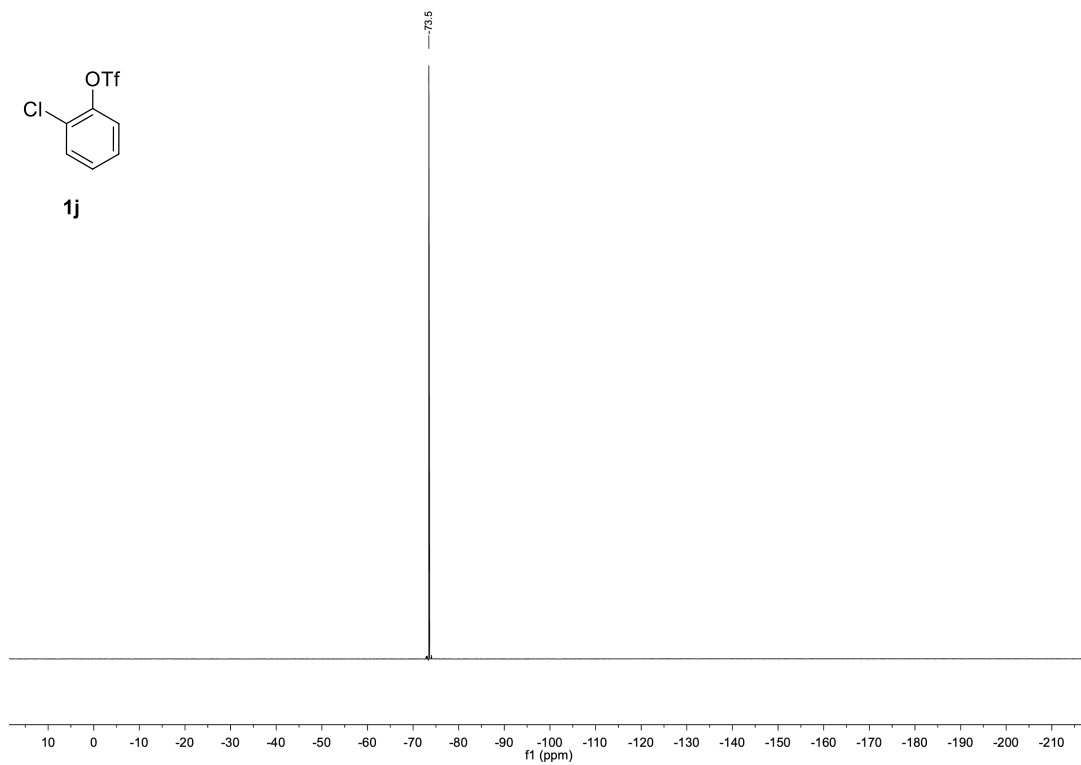

**Figure S35.**  $^{19}\text{F}$ -NMR-spectrum (376 MHz,  $\text{CDCl}_3$ ) of **1j**.



**1-Acetylnaphthalen-2-yl trifluoromethanesulfonate (1k):**

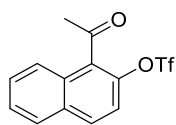

**1k**

$C_{13}H_9F_3O_4S$  (318.27 g/mol)

Following **GP-A**, **1k** was synthesized using 1-(2-hydroxynaphthalen-1-yl)ethan-1-one (1.86 g, 10.0 mmol, 1.0 equiv.). Purification by column chromatography ( $SiO_2$ , *n*-hexane/EtOAc 80:20) afforded **1k** (2.66 g, 8.36 mmol, 84%) as a pale-yellow oil. Conforms to reported analytical data.<sup>5</sup>

**R<sub>f</sub>**: 0.15 (*n*-hexane/EtOAc 99:1).

**<sup>1</sup>H-NMR** (400 MHz,  $CDCl_3$ ,  $\delta$ ): 8.01 – 7.89 (m, 2H), 7.85 – 7.78 (m, 1H), 7.67 – 7.56 (m, 2H), 7.49 – 7.42 (m, 1H), 2.73 (s, 3H).

**<sup>13</sup>C-NMR** (101 MHz,  $CDCl_3$ ,  $\delta$ ): 200.8, 142.5, 132.6, 132.1, 131.8, 129.8, 128.8, 128.7, 127.7, 125.1, 119.2, 118.6 (q,  $J = 320.5$  Hz), 32.9.

**<sup>19</sup>F-NMR** (376 MHz,  $CDCl_3$ ,  $\delta$ ): -73.3.

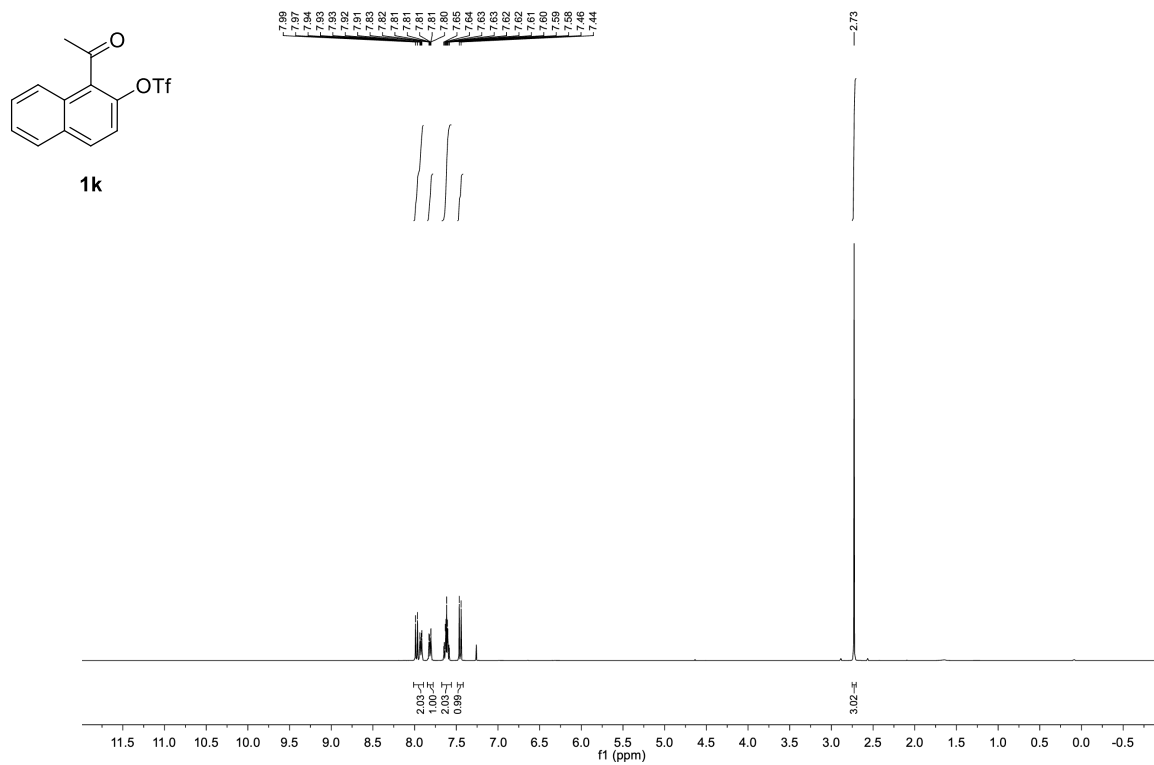

Figure S36. <sup>1</sup>H-NMR-spectrum (400 MHz, CDCl<sub>3</sub>) of **1k**.

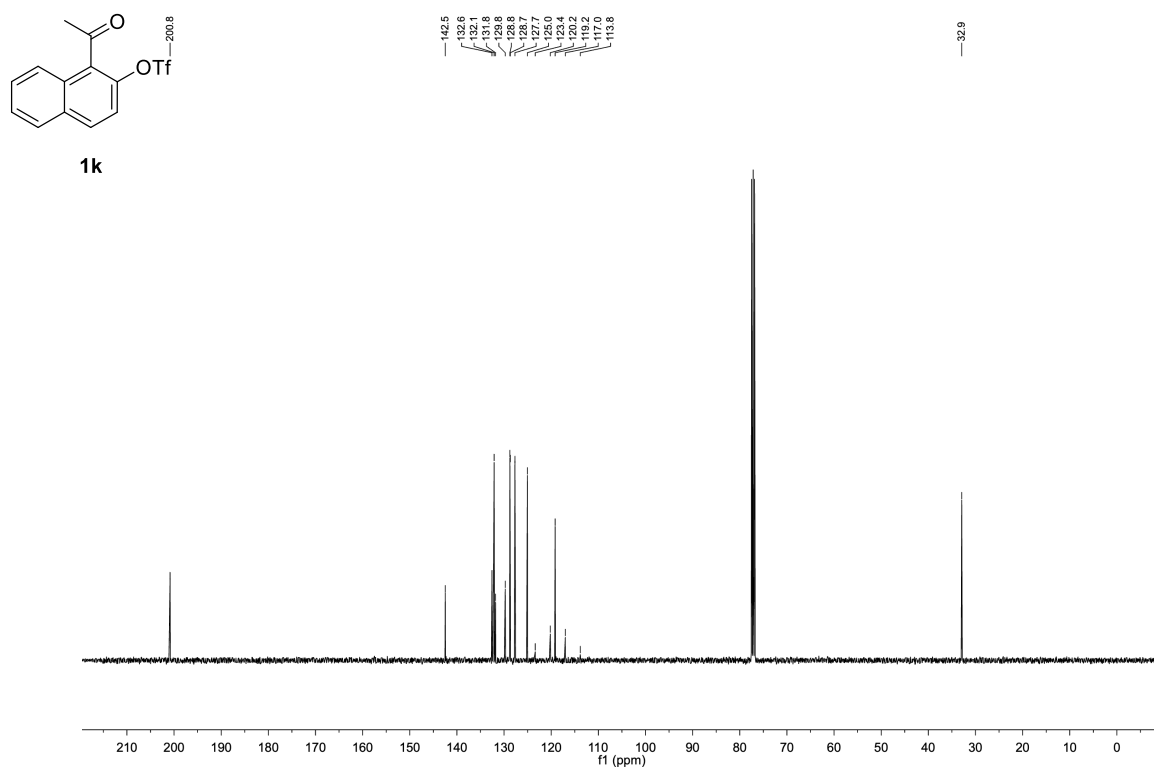

Figure S37. <sup>13</sup>C-NMR-spectrum (101 MHz, CDCl<sub>3</sub>) of **1k**.

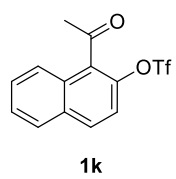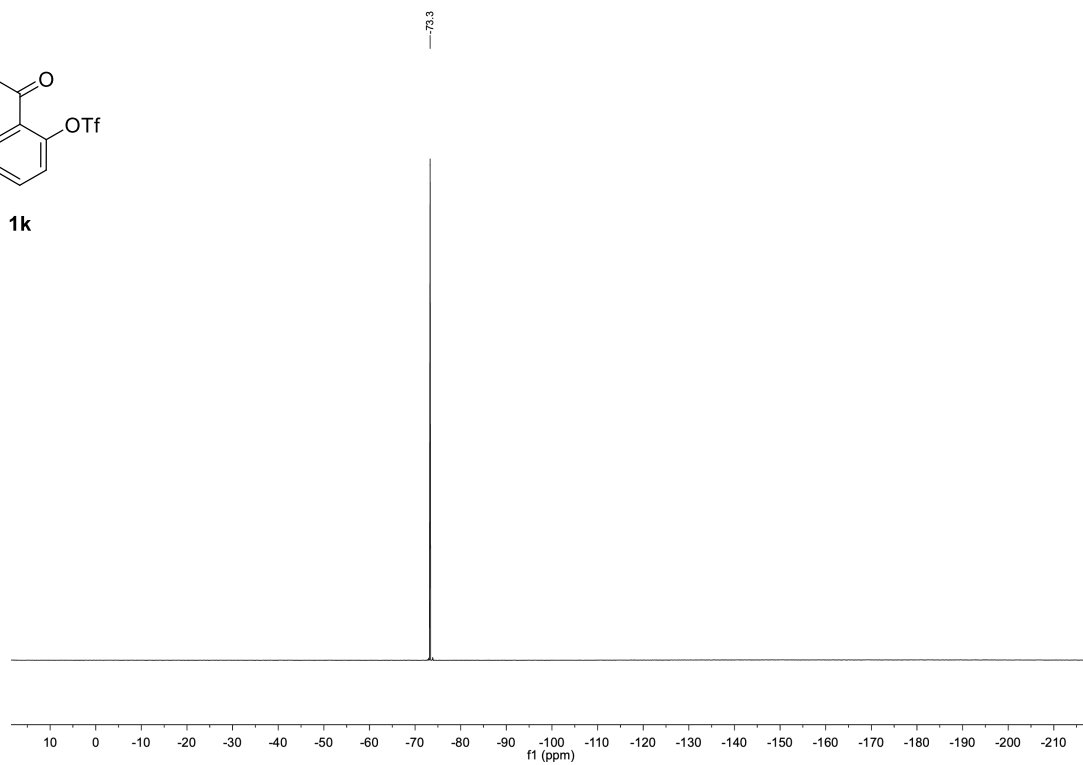

**Figure S38.**  $^{19}\text{F}$ -NMR-spectrum (376 MHz,  $\text{CDCl}_3$ ) of **1k**.

**Ethyl 2-(((trifluoromethyl)sulfonyl)oxy)benzoate (**1**):**

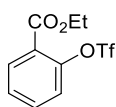

**1**

$C_{10}H_9F_3O_5S$  (298.23 g/mol)

Following **GP-A**, **1** was synthesized using ethyl 2-hydroxybenzoate (1.66 g, 10.0 mmol, 1.0 equiv.). Purification by column chromatography ( $SiO_2$ , *n*-hexane/EtOAc 90:10) afforded **1** (2.71 g, 9.10 mmol, 91%) as a colorless oil. Conforms to reported analytical data.<sup>13</sup>

**R<sub>f</sub>**: 0.32 (*n*-hexane/EtOAc 10:1).

**<sup>1</sup>H-NMR** (400 MHz,  $CDCl_3$ ,  $\delta$ ): 8.09 (dd,  $J = 7.8, 1.8$  Hz, 1H), 7.66 – 7.57 (m, 1H), 7.52 – 7.43 (m, 1H), 7.33 – 7.27 (m, 1H), 4.45 (q,  $J = 7.1$  Hz, 2H), 1.42 (t,  $J = 7.1$  Hz, 3H).

**<sup>13</sup>C-NMR** (101 MHz,  $CDCl_3$ ,  $\delta$ ): 163.9, 148.4, 134.2, 132.9, 128.5, 125.0, 122.8, 118.8 (q,  $J = 320.7$  Hz), 62.3, 14.2.

**<sup>19</sup>F-NMR** (376 MHz,  $CDCl_3$ ,  $\delta$ ): -73.4.

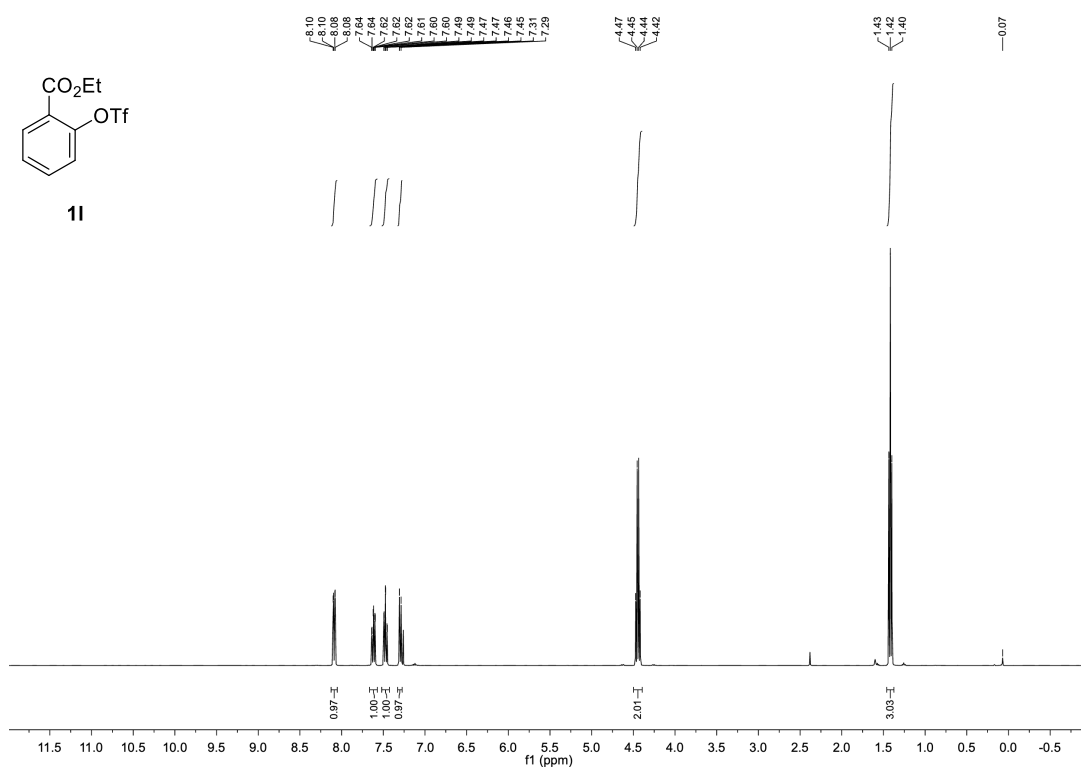

Figure S39.  $^1\text{H}$ -NMR-spectrum (400 MHz,  $\text{CDCl}_3$ ) of **11**.

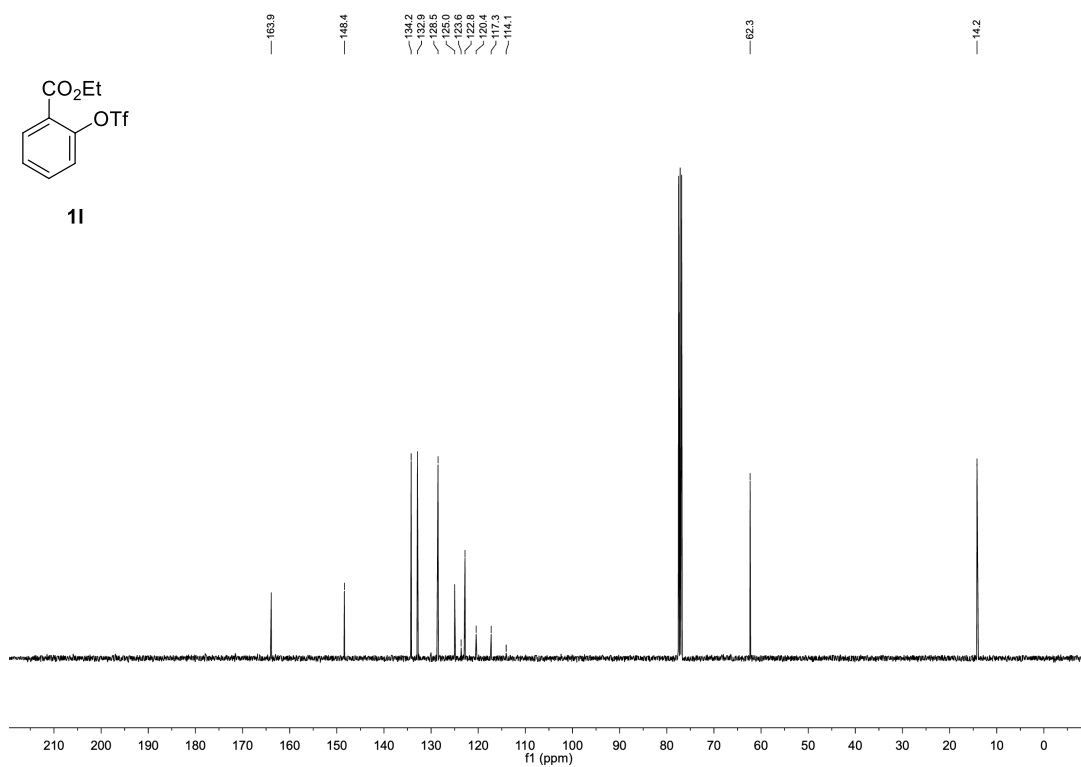

Figure S40.  $^{13}\text{C}$ -NMR-spectrum (101 MHz,  $\text{CDCl}_3$ ) of **11**.

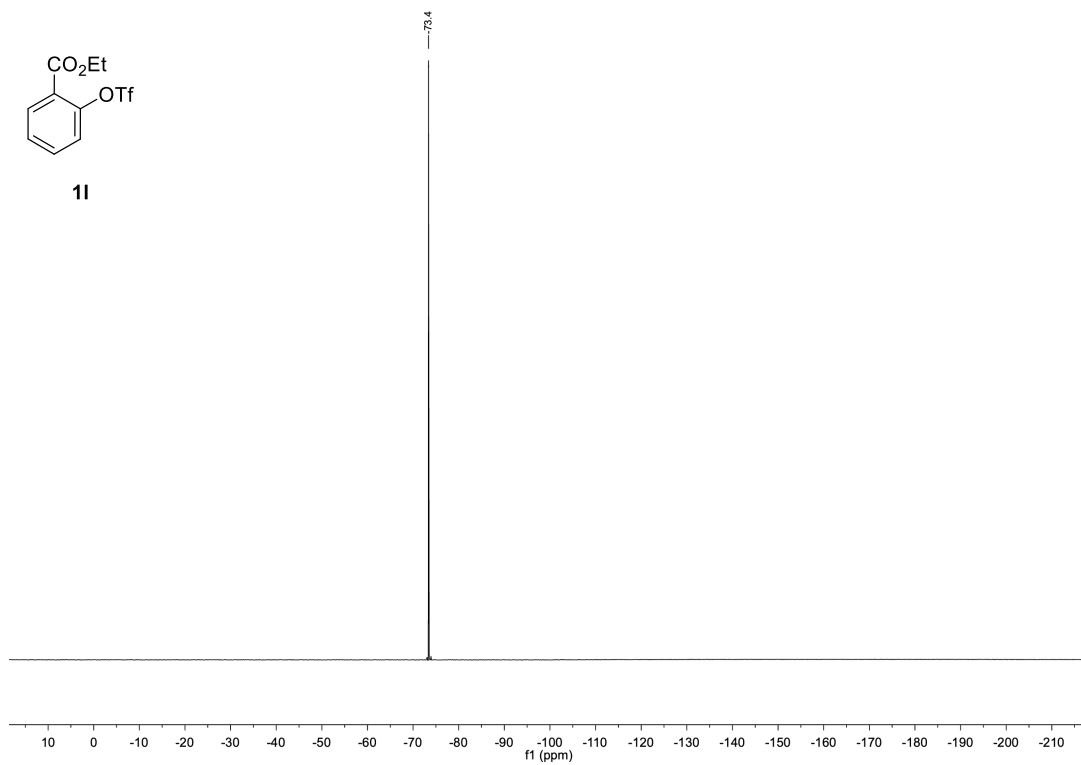

**Figure S41.** <sup>19</sup>F-NMR-spectrum (376 MHz, CDCl<sub>3</sub>) of **11**.

**2-(4,4,5,5-Tetramethyl-1,3,2-dioxaborolan-2-yl)phenyl trifluoromethanesulfonate (1m):**

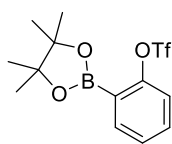

**1m**

C<sub>13</sub>H<sub>16</sub>BF<sub>3</sub>O<sub>5</sub>S (352.13 g/mol)

Following **GP-A**, **1m** was synthesized using 2-(4,4,5,5-tetramethyl-1,3,2-dioxaborolan-2-yl)phenol (2.20 g, 10.0 mmol, 1.0 equiv.). Purification by column chromatography (SiO<sub>2</sub>, *n*-hexane/EtOAc 90:10) afforded **1m** (3.25 g, 9.23 mmol, 92%) as colorless oil. Conforms to reported analytical data.<sup>11</sup>

**R<sub>f</sub>**: 0.66 (*n*-hexane/EtOAc 90:10).

**<sup>1</sup>H-NMR** (400 MHz, CDCl<sub>3</sub>, δ): 7.89 – 7.84 (m, 1H), 7.55 – 7.49 (m, 1H), 7.40 – 7.35 (m, 1H), 7.24 – 7.20 (m, 1H), 1.37 (s, 12H).

**<sup>13</sup>C-NMR** (101 MHz, CDCl<sub>3</sub>, δ): 154.4, 137.3, 133.0, 127.9, 121.2, 119.0 (q, *J* = 320.8 Hz), 100.1, 84.7, 24.9.

**<sup>19</sup>F-NMR** (376 MHz, CDCl<sub>3</sub>, δ): -73.1.

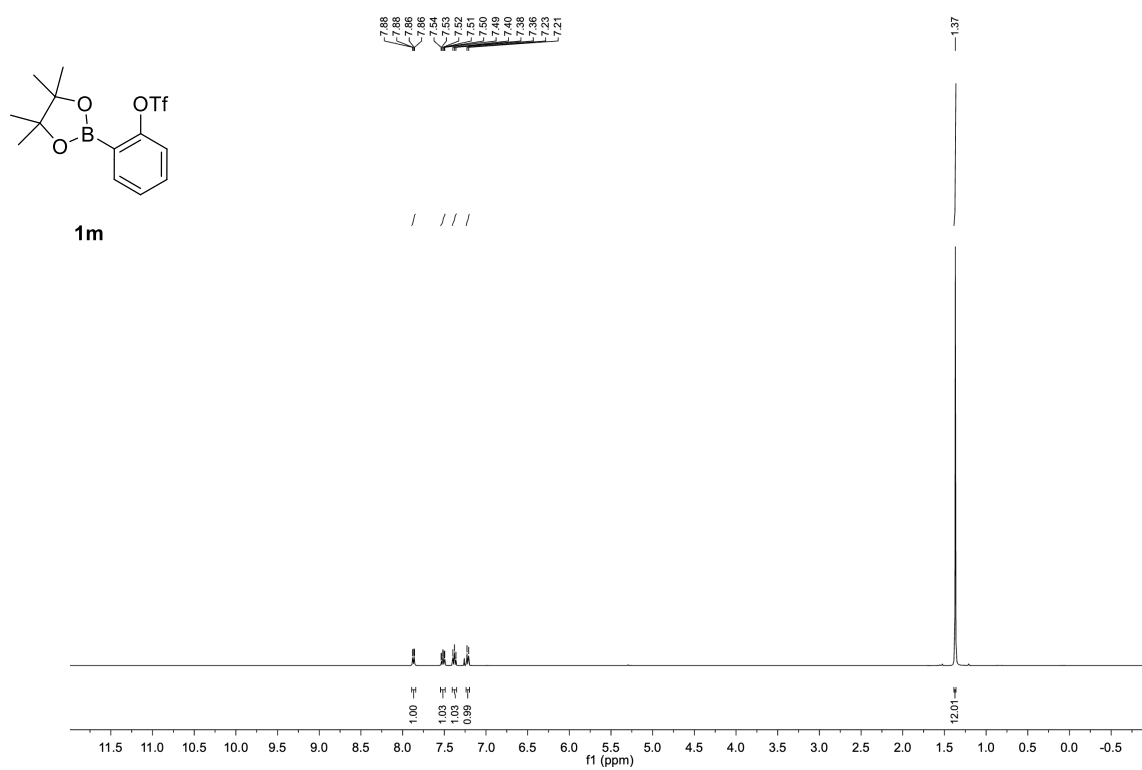

**Figure S42.** <sup>1</sup>H-NMR-spectrum (400 MHz, CDCl<sub>3</sub>) of **1m**.

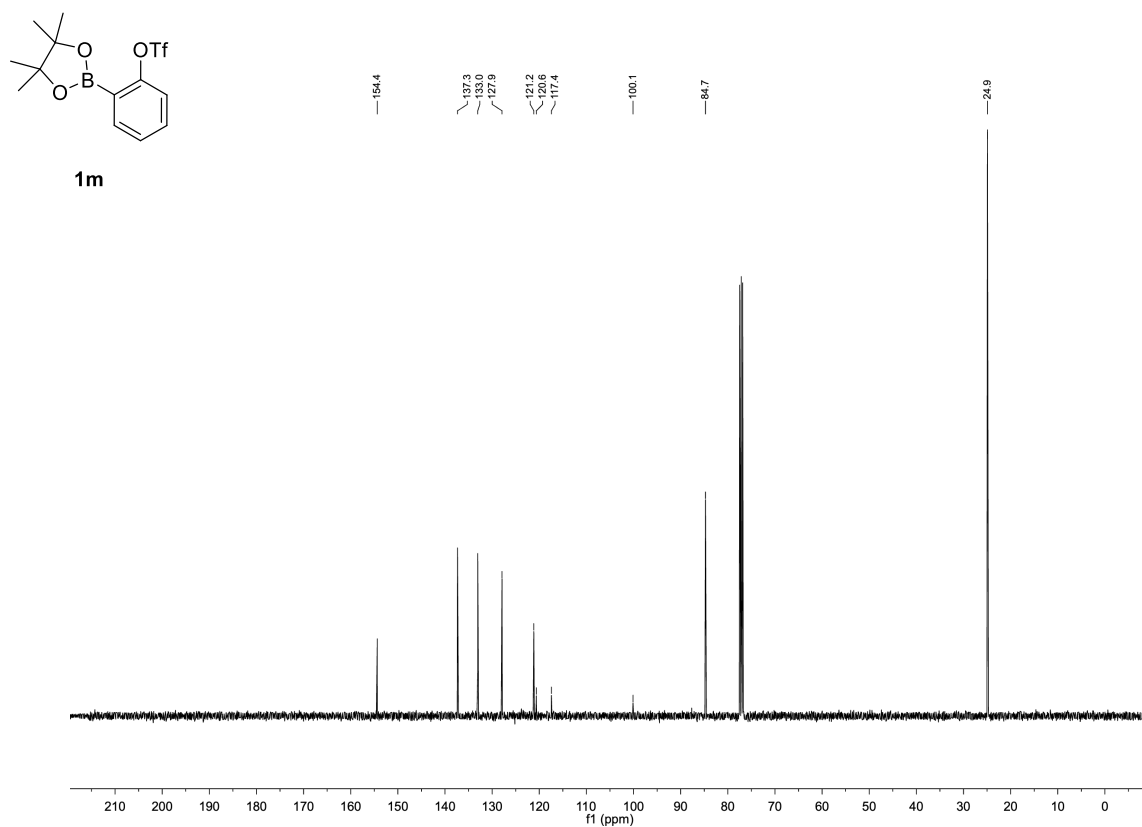

**Figure S43.** <sup>13</sup>C-NMR-spectrum (101 MHz, CDCl<sub>3</sub>) of **1m**.



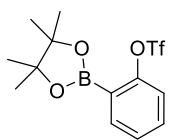

**1m**

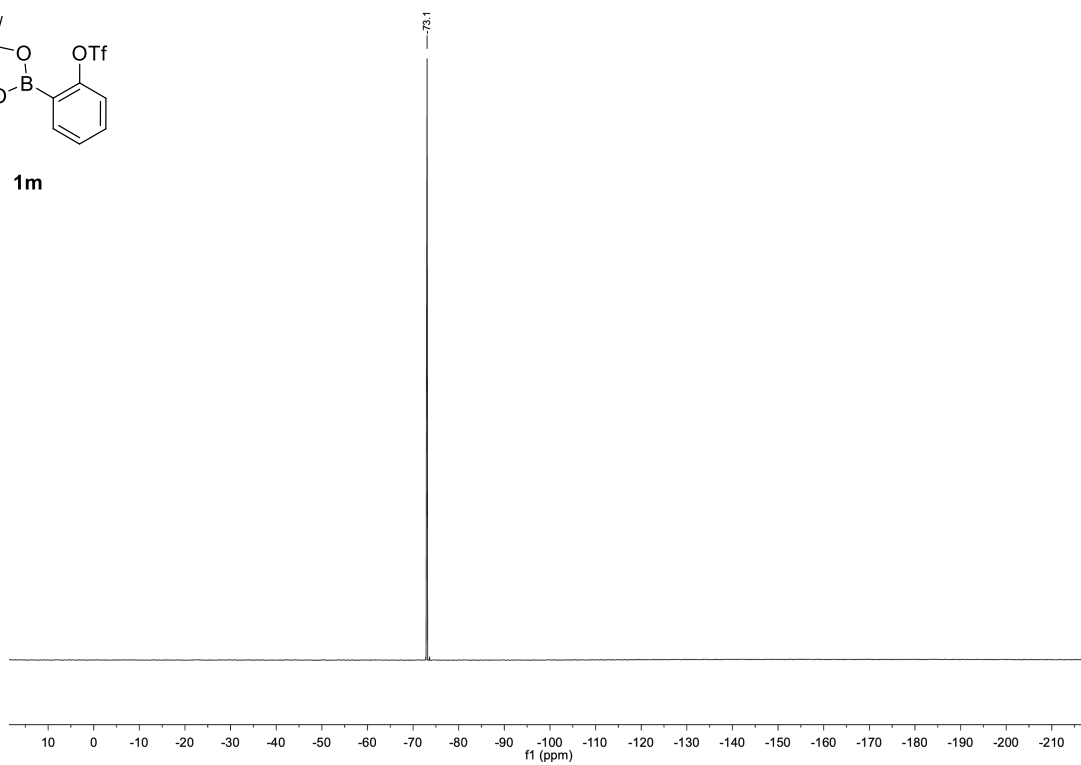

**Figure S44.**  $^{19}\text{F}$ -NMR-spectrum (376 MHz,  $\text{CDCl}_3$ ) of **1m**.

**4-Acetyl-2-methoxyphenyl trifluoromethanesulfonate (1n):**

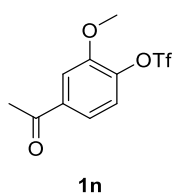

$C_{10}H_9F_3O_5S$  (298.23 g/mol)

Following **GP-A**, **1n** was synthesized using acetovanillon (1.66 g, 10.0 mmol, 1.0 equiv.). Purification by column chromatography ( $SiO_2$ , *n*-hexane/EtOAc 80:20) afforded **1n** (1.44 g, 4.83 mmol, 48%) as a colorless solid. Conforms to reported analytical data.<sup>14</sup>

**R<sub>f</sub>**: 0.40 (*n*-hexane/EtOAc 80:20).

**<sup>1</sup>H-NMR** (400 MHz,  $CDCl_3$ ,  $\delta$ ): 7.66 (d,  $J = 2.0$  Hz, 1H), 7.57 (dd,  $J = 8.4, 2.0$  Hz, 1H), 7.32 (d,  $J = 8.4$  Hz, 1H), 3.98 (s, 3H), 2.62 (s, 3H).

**<sup>13</sup>C-NMR** (101 MHz,  $CDCl_3$ ,  $\delta$ ): 196.5, 151.8, 142.0, 137.9, 122.7, 121.8, 118.6 (q,  $J = 321.1$  Hz), 112.4, 56.6, 26.8.

**<sup>19</sup>F-NMR** (376 MHz,  $CDCl_3$ ,  $\delta$ ): -73.7.

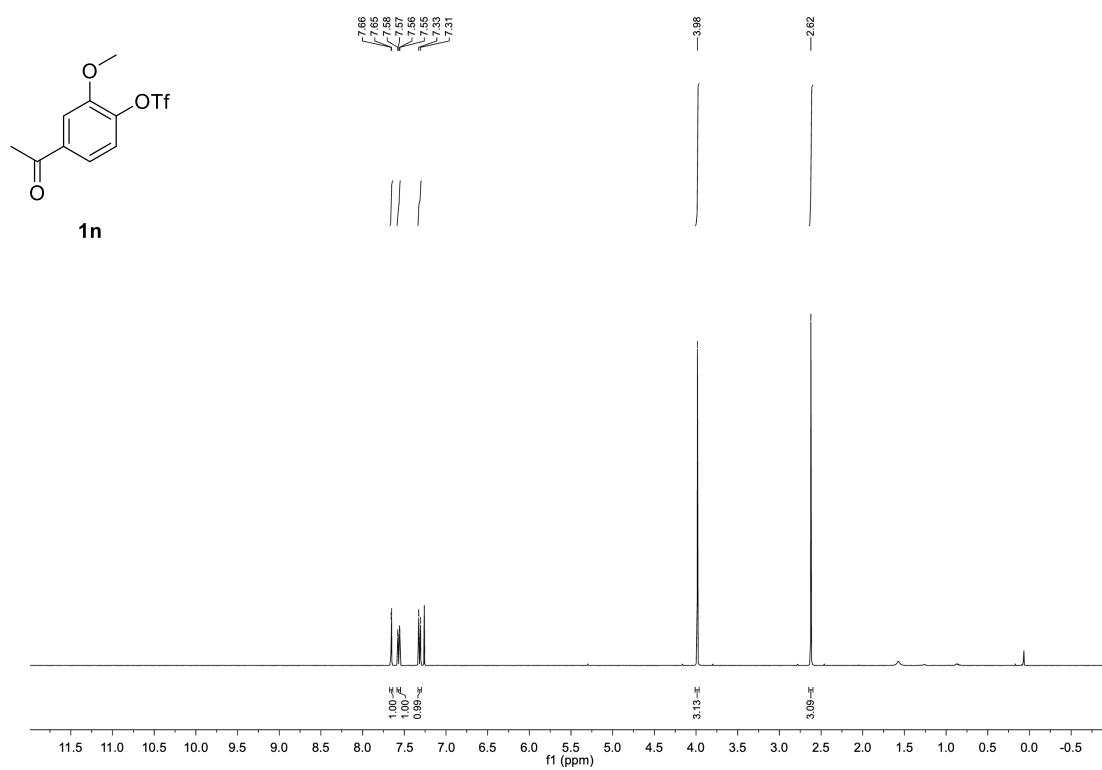

Figure S45. <sup>1</sup>H-NMR-spectrum (400 MHz, CDCl<sub>3</sub>) of **1n**.

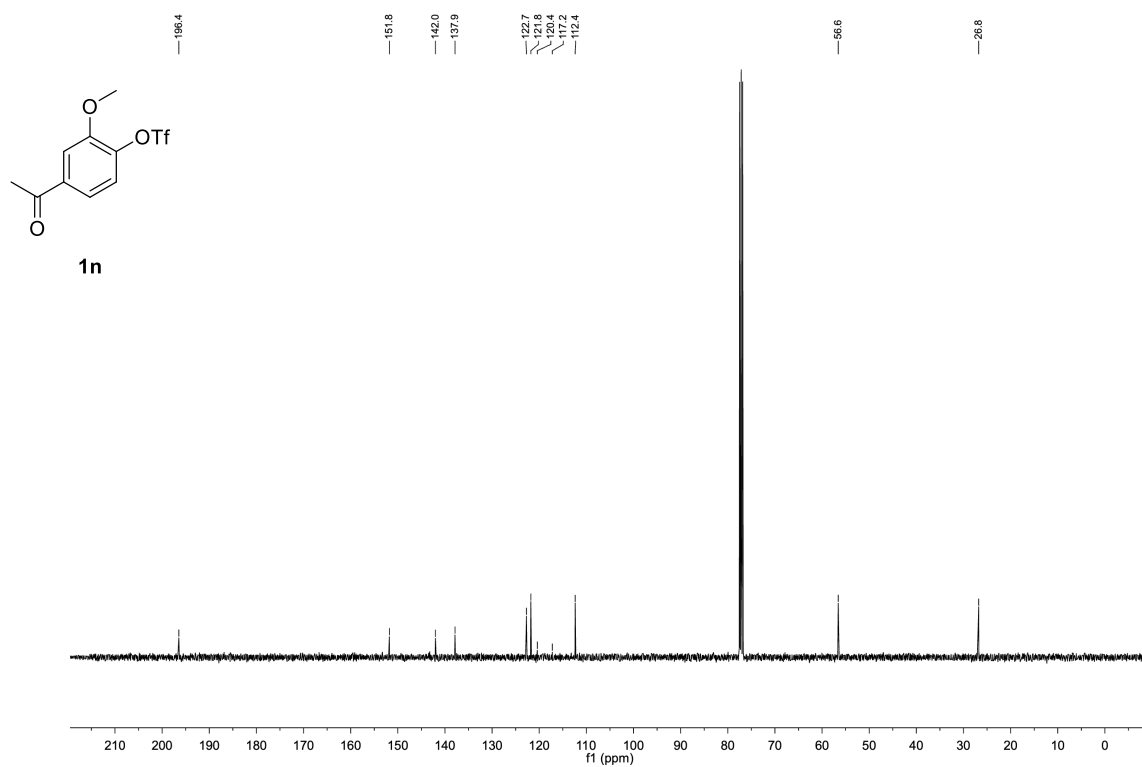

Figure S46. <sup>13</sup>C-NMR-spectrum (101 MHz, CDCl<sub>3</sub>) of **1n**.

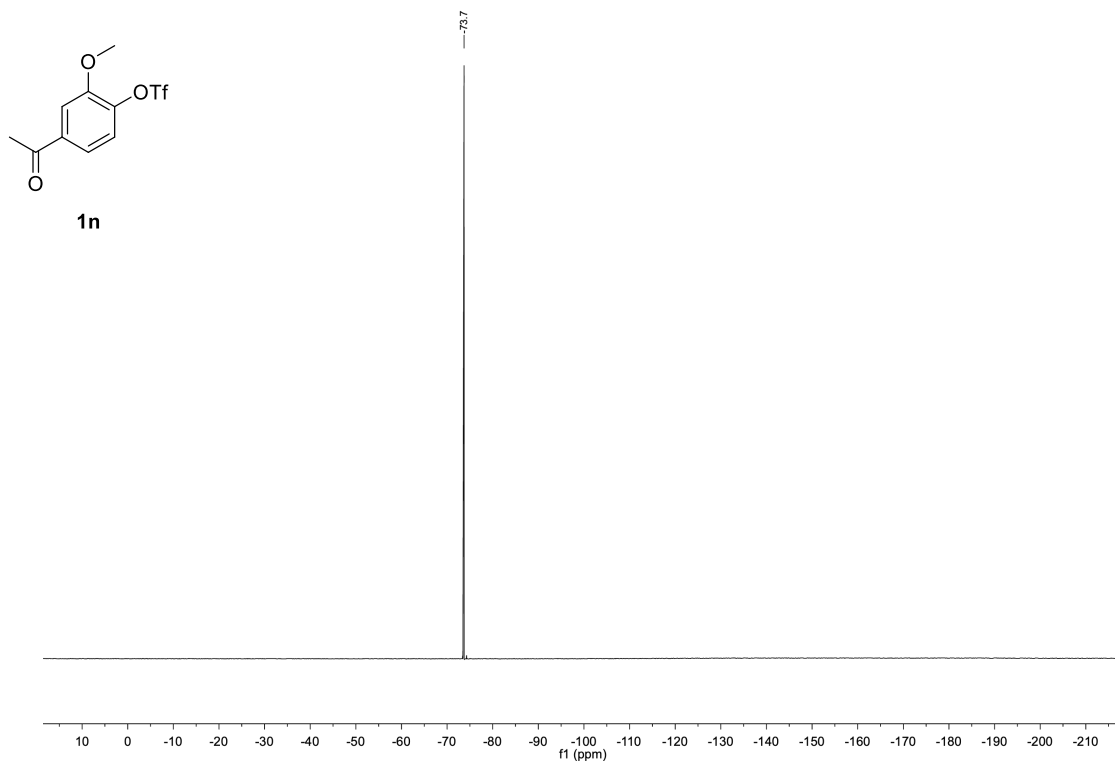

**Figure S47.**  $^{19}\text{F}$ -NMR-spectrum (376 MHz,  $\text{CDCl}_3$ ) of **1n**.

## 2-Phenylpyridin-3-yl trifluoromethanesulfonate (**1o**):

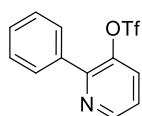

**1o**

C<sub>12</sub>H<sub>8</sub>F<sub>3</sub>NO<sub>3</sub>S (303.26 g/mol)

Following **GP-A**, **1o** was synthesized using 2-phenylpyridin-3-ol (270 mg, 1.58 mmol, 1.0 equiv.). Purification by column chromatography (SiO<sub>2</sub>, *n*-hexane/EtOAc 90:10) afforded **1o** (390 mg, 1.29 mmol, 82%) as a colorless oil.

**R<sub>f</sub>**: 0.24 (*n*-hexane/EtOAc 90:10).

**<sup>1</sup>H-NMR** (400 MHz, CDCl<sub>3</sub>, δ): 8.73 (m, 1H), 7.81 – 7.71 (m, 3H), 7.55 – 7.43 (m, 3H), 7.42 – 7.35 (m, 1H).

**<sup>13</sup>C-NMR** (101 MHz, CDCl<sub>3</sub>, δ): 152.4, 149.3, 144.7, 135.2, 130.5, 129.9, 129.4, 128.7, 123.4, 118.4 (q, *J* = 321.0 Hz).

**<sup>19</sup>F-NMR** (376 MHz, CDCl<sub>3</sub>, δ): -73.6.

**HR-MS** (ESI): *m/z* calc for [M+H]<sup>+</sup> 304.02498, found 304.02537.

**IR** (ATR,  $\tilde{\nu}$  [cm<sup>-1</sup>]): 3062 (w), 1590 (w), 1419 (vs), 1206 (vs), 1135 (vs), 1101 (s), 1050 (m), 1019 (w), 875 (vs), 807 (s), 788 (s), 740 (s), 698 (s).

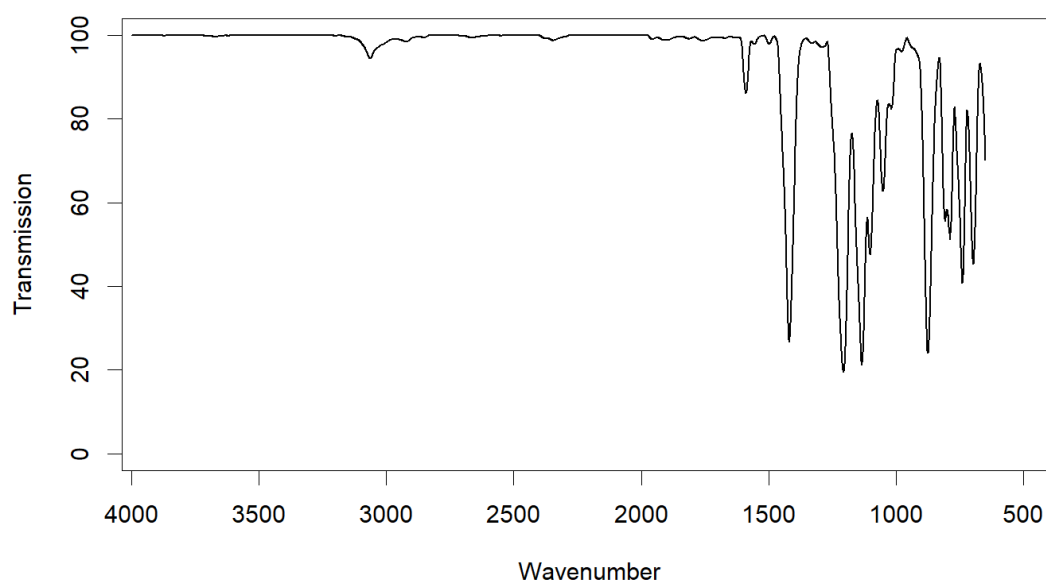

**Figure S48.** IR-spectrum (ATR, neat) of **1o**.

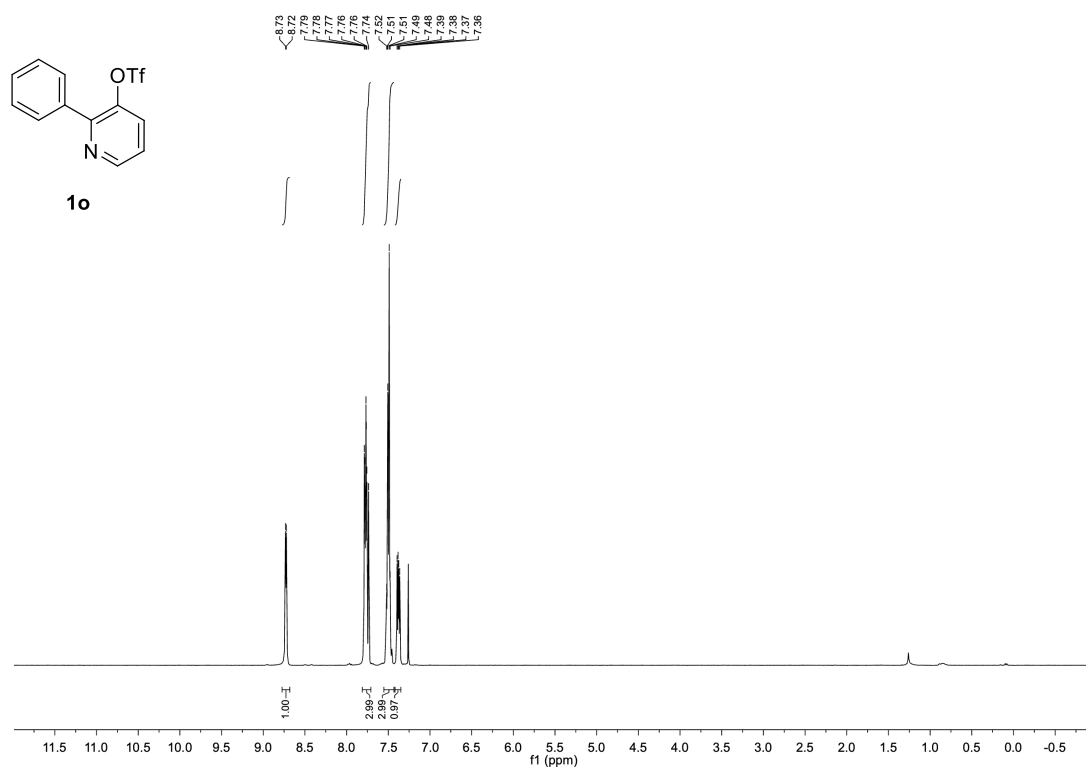

Figure S49.  $^1\text{H}$ -NMR-spectrum (400 MHz,  $\text{CDCl}_3$ ) of **1o**.

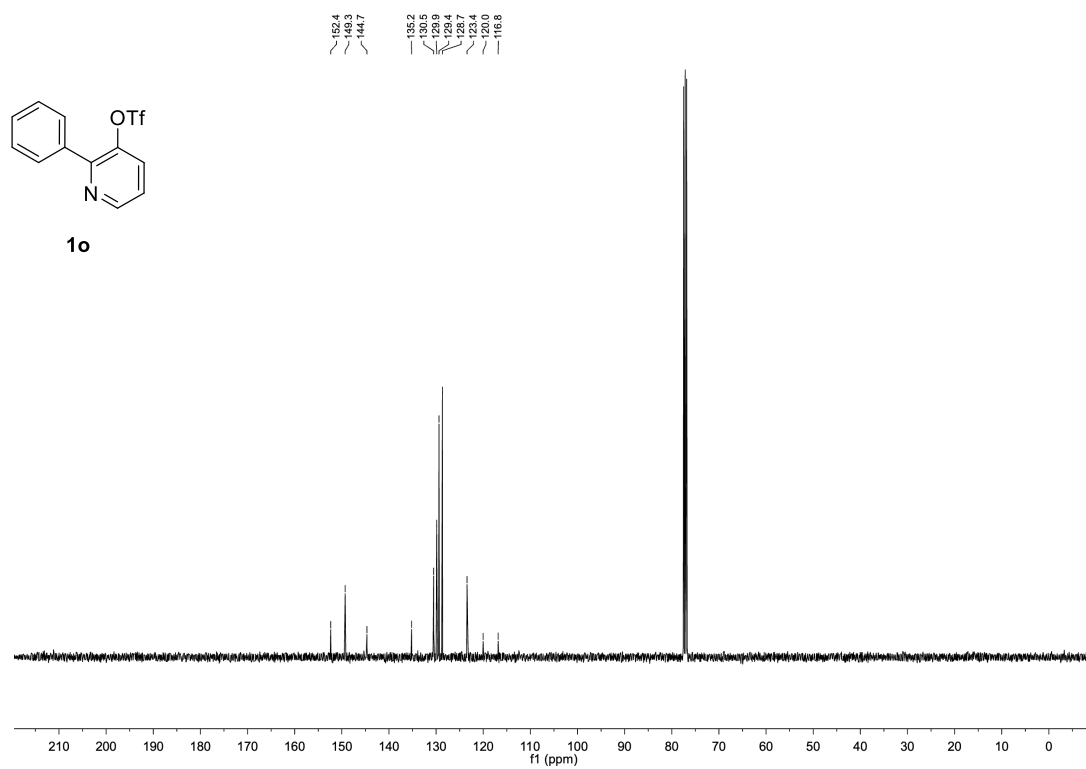

Figure S50.  $^{13}\text{C}$ -NMR-spectrum (101 MHz,  $\text{CDCl}_3$ ) of **1o**.

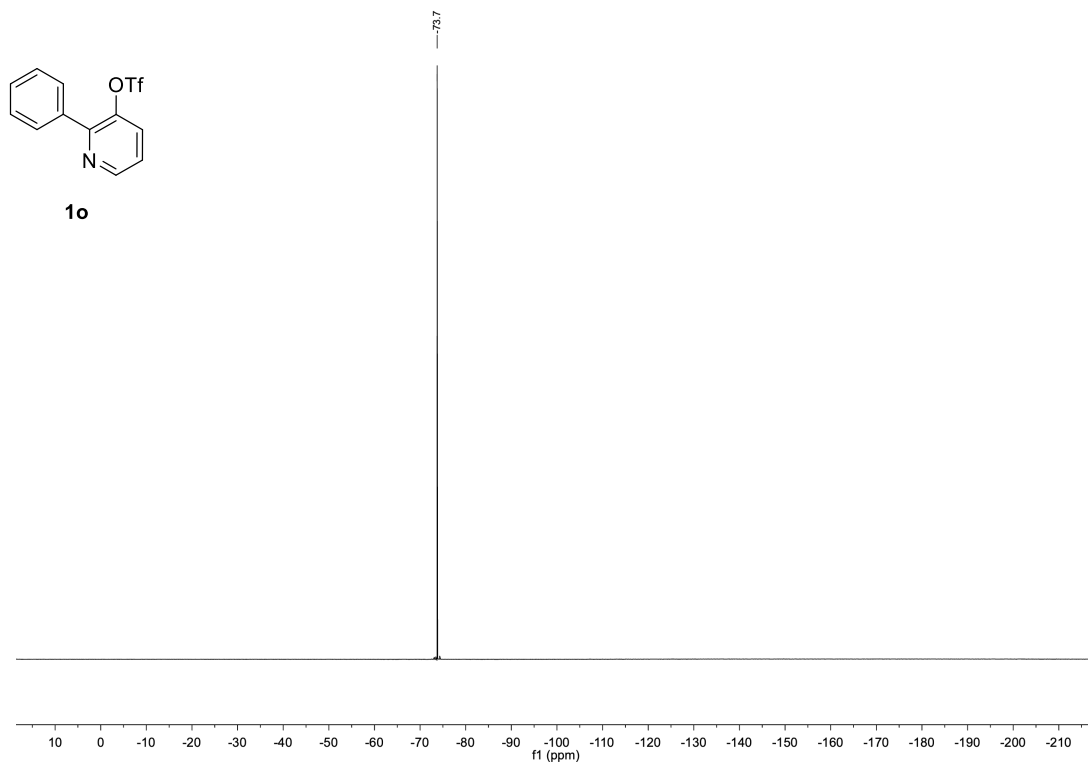

**Figure S51.**  $^{19}\text{F}$ -NMR-spectrum (376 MHz,  $\text{CDCl}_3$ ) of **1o**.

## 2-(Piperidin-1-yl)phenyl trifluoromethanesulfonate (**1t**):

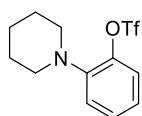

**1t**

C<sub>12</sub>H<sub>14</sub>F<sub>3</sub>NO<sub>3</sub>S (309.30 g/mol)

Following **GP-A**, **1t** was synthesized using 2-(piperidin-1-yl)phenol (0.787 g, 4.44 mmol, 1.0 equiv.). Purification by column chromatography (SiO<sub>2</sub>, *n*-hexane/EtOAc 90:10) afforded **1t** (1.27 g, 4.11 mmol, 93%) as a colorless oil.

**R<sub>f</sub>**: 0.88 (*n*-hexane/EtOAc 90:10).

**<sup>1</sup>H-NMR** (400 MHz, CDCl<sub>3</sub>, δ): 7.33 – 7.27 (m, 1H), 7.19 – 7.12 (m, 2H), 7.08 – 7.02 (m, 1H), 2.98 – 2.90 (m, 4H), 1.80 – 1.73 (m, 4H), 1.61 – 1.53 (m, 2H).

**<sup>13</sup>C-NMR** (101 MHz, CDCl<sub>3</sub>, δ): 147.4, 144.6, 129.1, 123.5, 121.8, 121.6, 118.9 (q, *J* = 320.2 Hz), 53.0, 25.9, 24.2.

**<sup>19</sup>F-NMR** (376 MHz, CDCl<sub>3</sub>, δ): -74.6.

**HR-MS** (ESI): *m/z* calc for [M+H]<sup>+</sup> 310.07193, found 310.07232.

**IR** (ATR,  $\tilde{\nu}$  [cm<sup>-1</sup>]): 2939 (w), 2857 (w), 2809 (w), 1605 (w), 1492 (m), 1452 (w), 1418 (vs), 1385 (w), 1336 (w), 1277 (w), 1240 (s), 1199 (vs), 1139 (vs), 1087 (s), 1038 (m), 926 (m), 874 (vs), 837 (m), 758 (s), 717 (w).

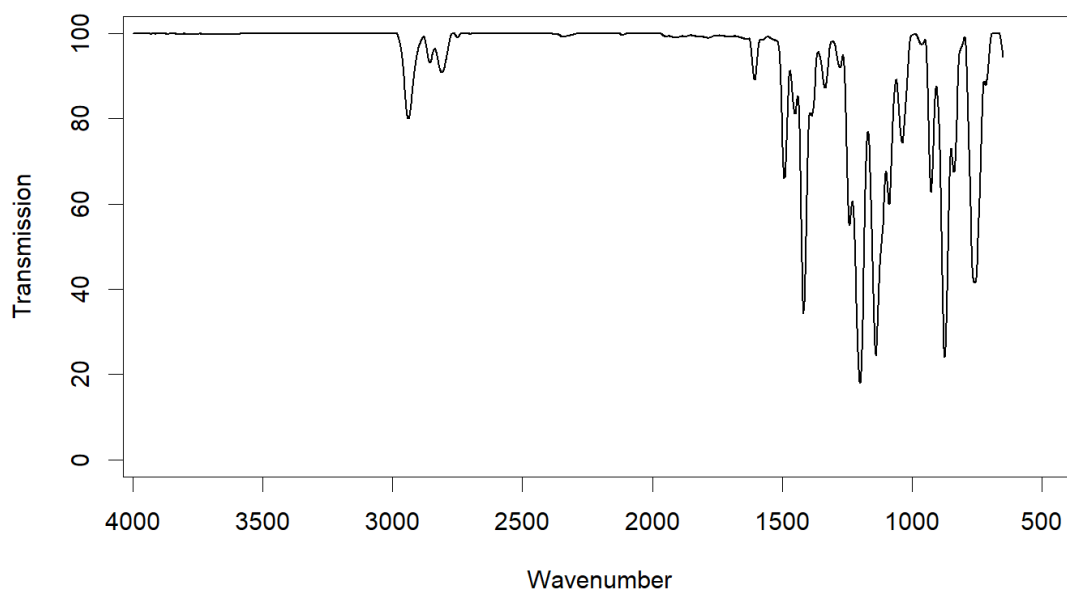

**Figure S52.** IR-spectrum (ATR, neat) of **1t**.



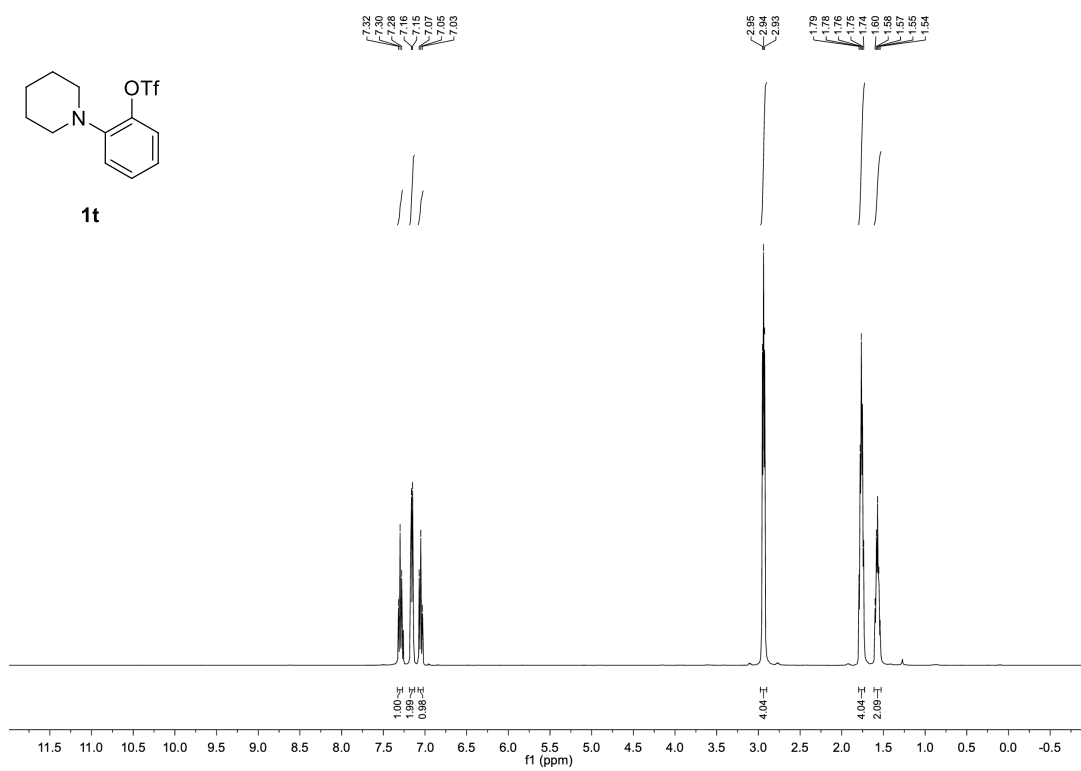

Figure S53.  $^1\text{H}$ -NMR-spectrum (400 MHz,  $\text{CDCl}_3$ ) of **1t**.

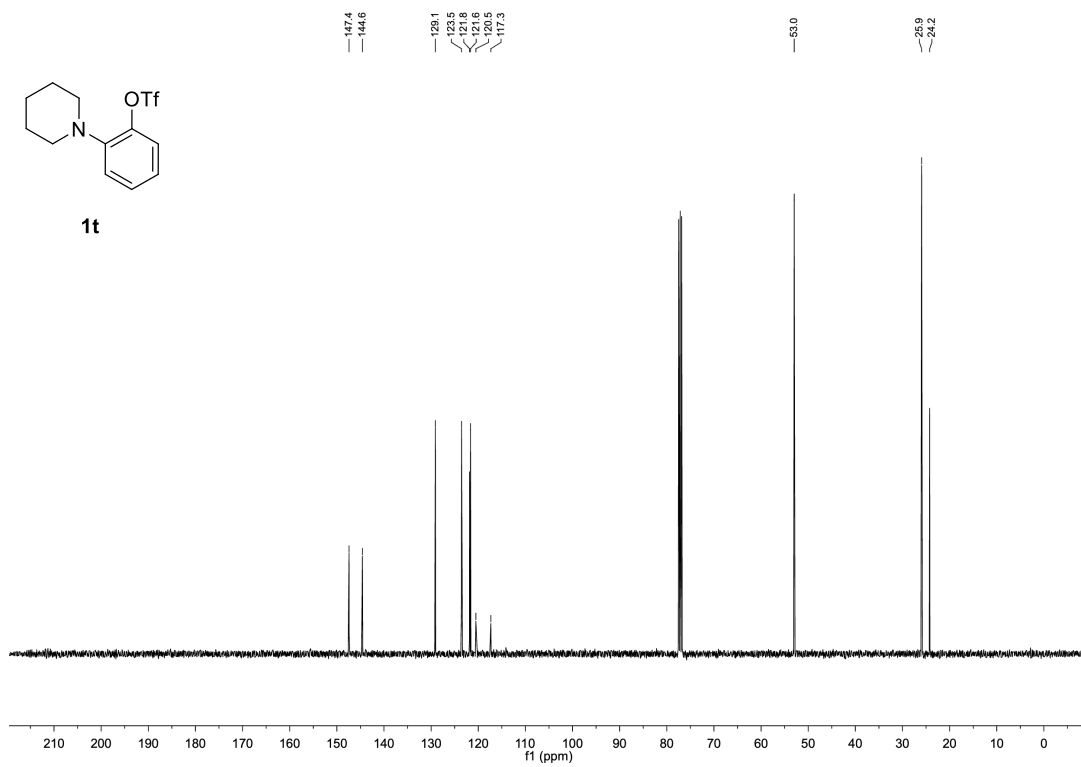

Figure S54.  $^{13}\text{C}$ -NMR-spectrum (101 MHz,  $\text{CDCl}_3$ ) of **1t**.

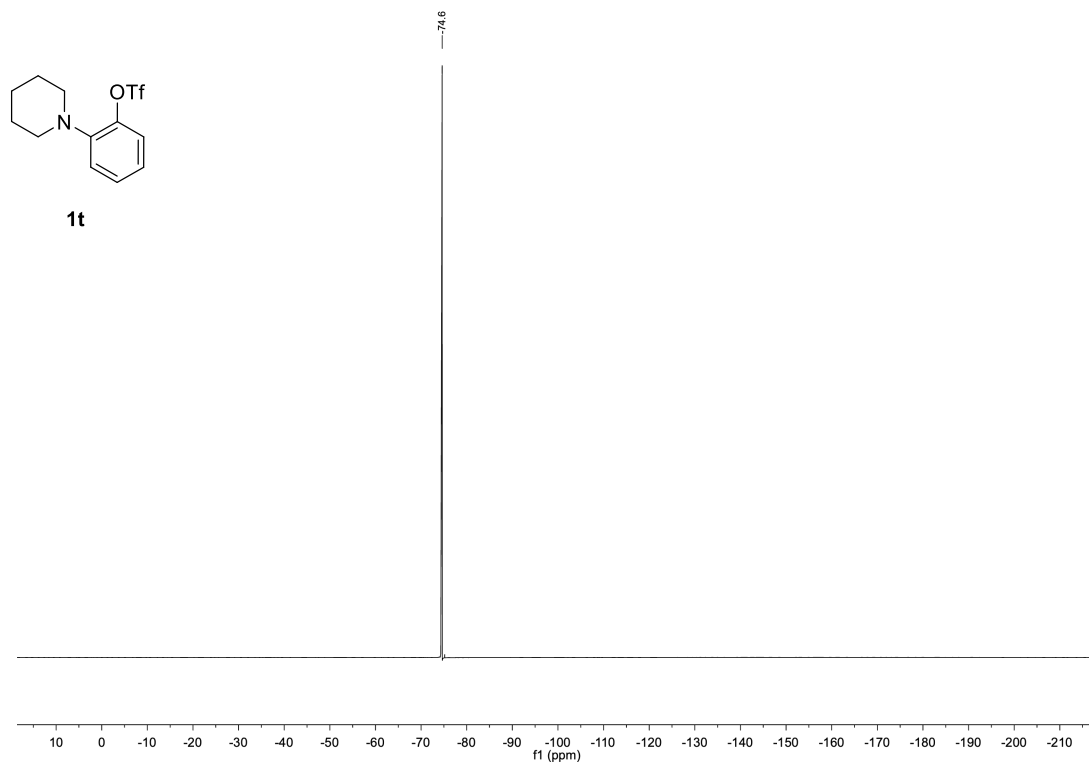

**Figure S55.**  $^{19}\text{F}$ -NMR-spectrum (376 MHz,  $\text{CDCl}_3$ ) of **1t**.

**2-Acetamidophenyl trifluoromethanesulfonate (1u):**

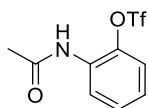

**1u**

C<sub>9</sub>H<sub>8</sub>F<sub>3</sub>NO<sub>4</sub>S (283.22 g/mol)

Following **GP-A**, **1u** was synthesized using *N*-(2-hydroxyphenyl)acetamide (1.51 g, 10.0 mmol, 1.0 equiv.). Purification by DC-VC (SiO<sub>2</sub>, gradient from *n*-hexane to EtOAc 100:0 to 0:100) afforded **1u** (1.65 g, 5.83 mmol, 58%) as yellow solid. Conforms to reported analytical data.<sup>15</sup>

**R<sub>f</sub>**: 0.17 (*n*-hexane/EtOAc 80:20).

**<sup>1</sup>H-NMR** (400 MHz, CDCl<sub>3</sub>, δ): 8.19 (d, *J* = 8.2 Hz, 1H), 7.42 – 7.26 (m, 3H), 7.22 – 7.14 (m, 1H), 2.22 (s, 3H).

**<sup>13</sup>C-NMR** (101 MHz, CDCl<sub>3</sub>, δ): 168.7, 139.9, 130.4, 129.1, 125.6, 124.6, 121.6, 118.7 (q, *J* = 320.4 Hz), 24.3.

**<sup>19</sup>F-NMR** (376 MHz, CDCl<sub>3</sub>, δ): -73.4.

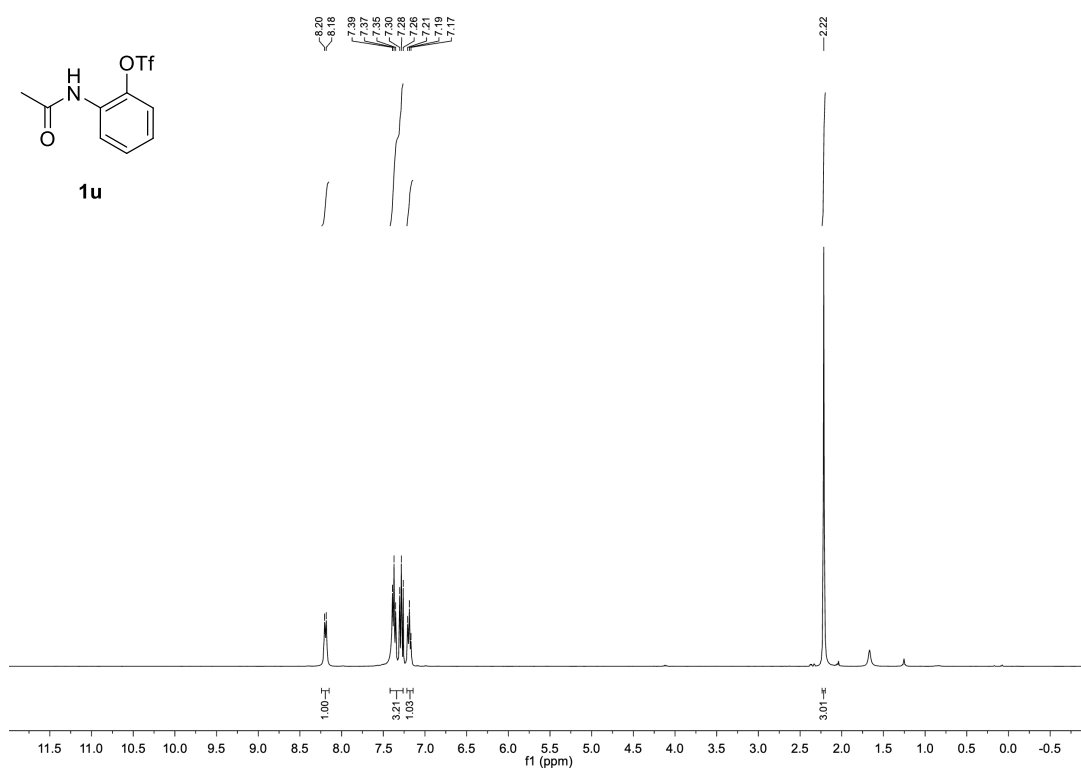

Figure S56. <sup>1</sup>H-NMR-spectrum (400 MHz, CDCl<sub>3</sub>) of **1u**.

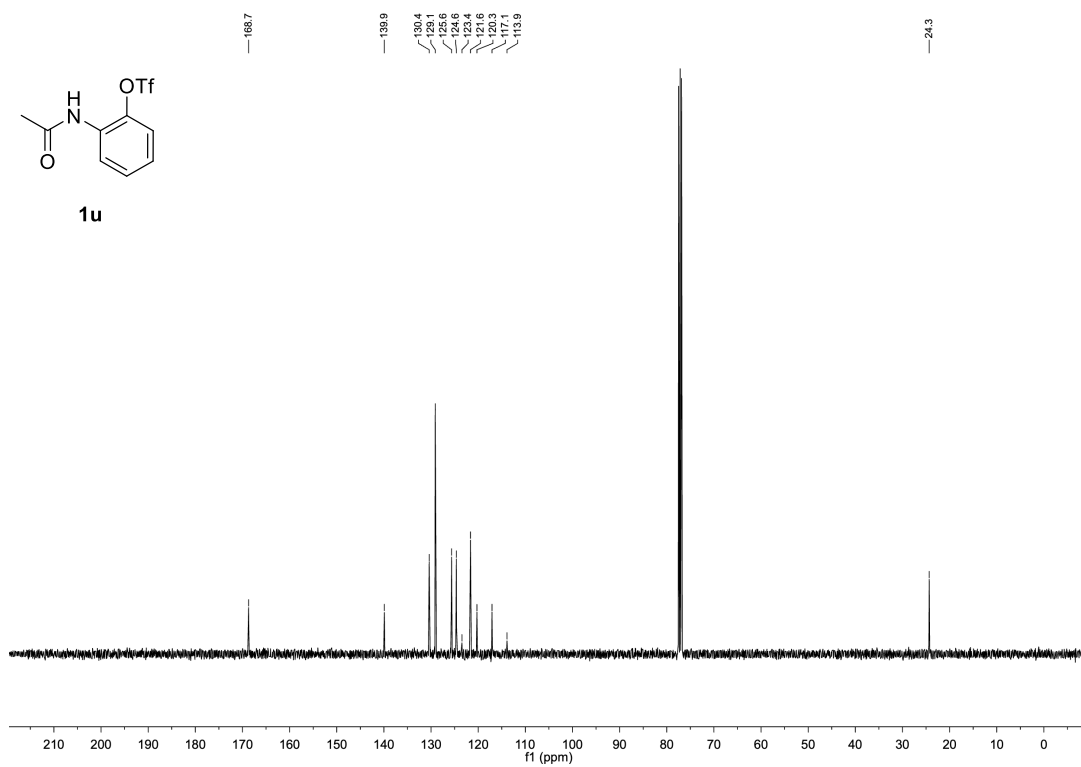

Figure S57. <sup>13</sup>C-NMR-spectrum (101 MHz, CDCl<sub>3</sub>) of **1u**.

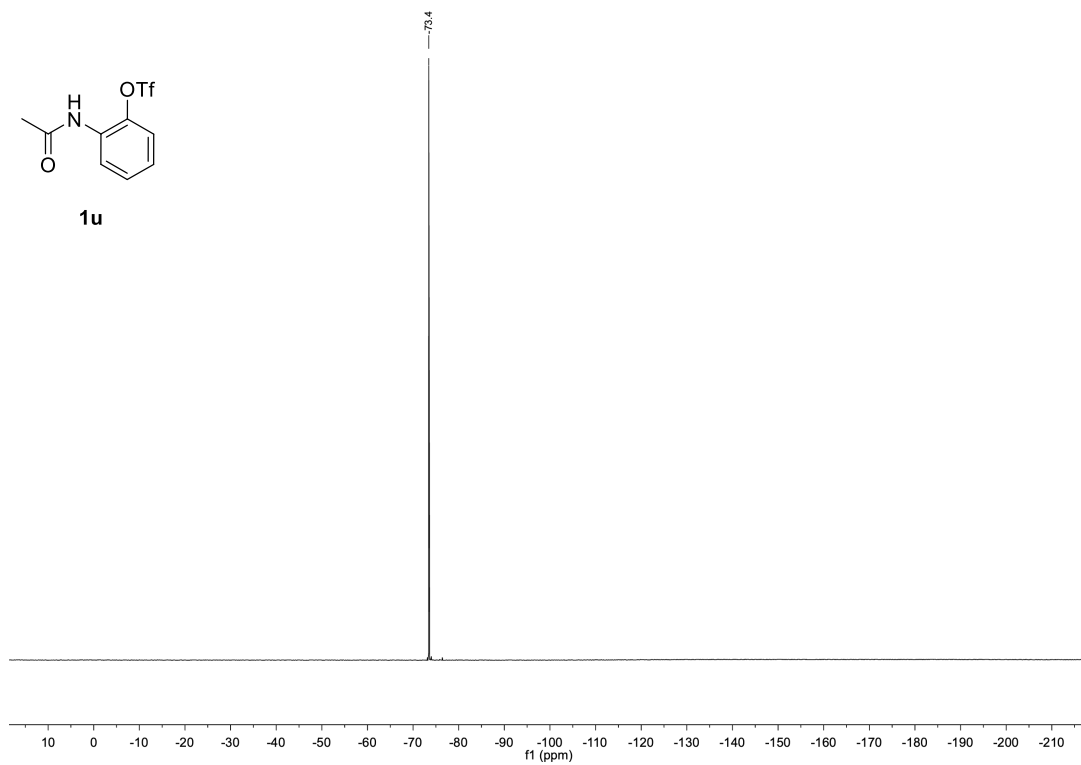

**Figure S58.**  $^{19}\text{F}$ -NMR-spectrum (376 MHz,  $\text{CDCl}_3$ ) of **1u**.

**(2aR,3R,5aS,5bS,7aR,9S,11aR,12aR)-2a,5a,8,8-tetramethyl-3-((S)-6-methylhept-5-en-2-yl)tetradecahydro-1H,12H-cyclopenta[*a*]cyclopropa[*e*]phenanthren-9-yl ((E)-3-(3-methoxy-4-((trifluoromethyl)sulfonyl)oxy)phenyl)acrylate (**1v**):**

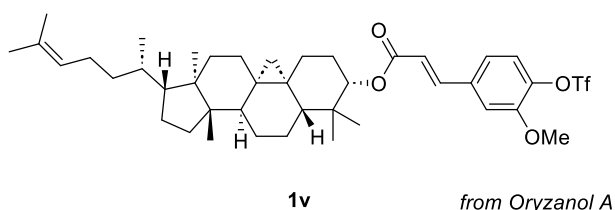

side components:

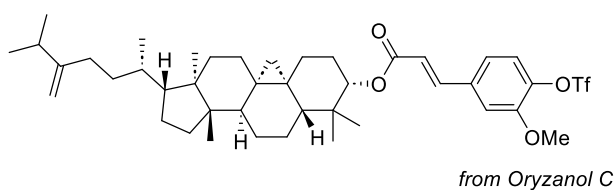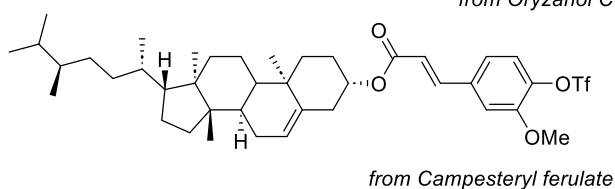

C<sub>41</sub>H<sub>57</sub>F<sub>3</sub>O<sub>6</sub>S (734.96 g/mol)

Following **GP-A**, **1v** was synthesized using  $\gamma$ -Oryzanol (purchased from TCI; a mixture containing Oryzanol A, Oryzanol C and Campesteryl ferulate as main components)<sup>16</sup> (2.94 g, 5.00 mmol, 1.0 equiv.). Purification by column chromatography (SiO<sub>2</sub>, *n*-hexane/EtOAc 90:10) afforded **1v** (2.56 g, 3.48 mmol, 70%, mixture according to starting material) as colorless solid. Conforms to reported analytical data.<sup>17</sup>

**R<sub>f</sub>**: 0.32 (*n*-hexane/EtOAc 95:5).

<sup>1</sup>H-NMR (400 MHz, CDCl<sub>3</sub>,  $\delta$ ): 7.61 (d, *J* = 15.9 Hz, 1H), 7.23 (d, *J* = 8.2 Hz, 1H), 7.18 – 7.11 (m, 2H), 6.42 (d, *J* = 15.9 Hz, 1H), 4.78 – 4.62 (m, 2H), 3.95 (s, 3H), 2.43 – 1.81 (m, 6H), 1.68 – 1.51 (m, 8H), 1.48 – 1.28 (m, 7H), 1.20 – 1.07 (m, 3H), 1.07 – 0.75 (m, 21H), 0.70 – 0.36 (m, 2H).

<sup>13</sup>C-NMR (101 MHz, CDCl<sub>3</sub>,  $\delta$ ): 166.3, 165.9, 157.0, 151.8, 142.7, 142.5, 139.7, 136.0, 131.0, 125.4, 122.0, 121.1, 121.0, 120.9, 118.6 (q, *J* = 320.7 Hz), 112.0, 106.1, 81.3, 74.6, 56.8, 56.4, 56.4, 52.4, 50.2, 49.0, 48.0, 47.4, 45.44, 45.42, 42.5, 39.8, 38.3, 37.1, 36.8, 36.5, 36.3, 36.0, 35.7, 35.1, 33.9, 33.0, 32.0, 31.8, 31.5, 29.9, 28.3, 28.0, 27.1, 26.7, 26.1, 26.0, 25.9, 25.6, 25.1, 22.1, 22.0, 21.2, 21.1, 20.3, 19.5, 19.5, 19.4, 18.5, 18.4, 18.1, 17.8, 15.4, 12.0.

<sup>19</sup>F-NMR (376 MHz, CDCl<sub>3</sub>,  $\delta$ ): -73.8.

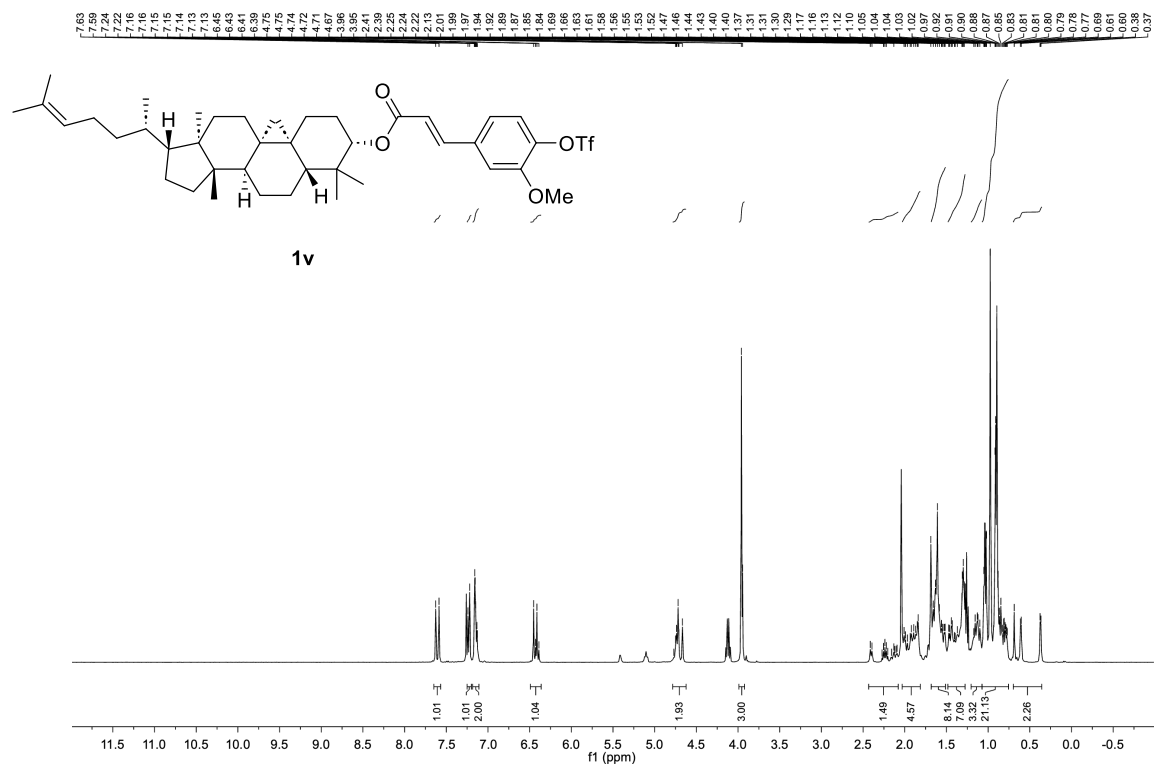

Figure S59. <sup>1</sup>H-NMR-spectrum (400 MHz, CDCl<sub>3</sub>) of **1v**.

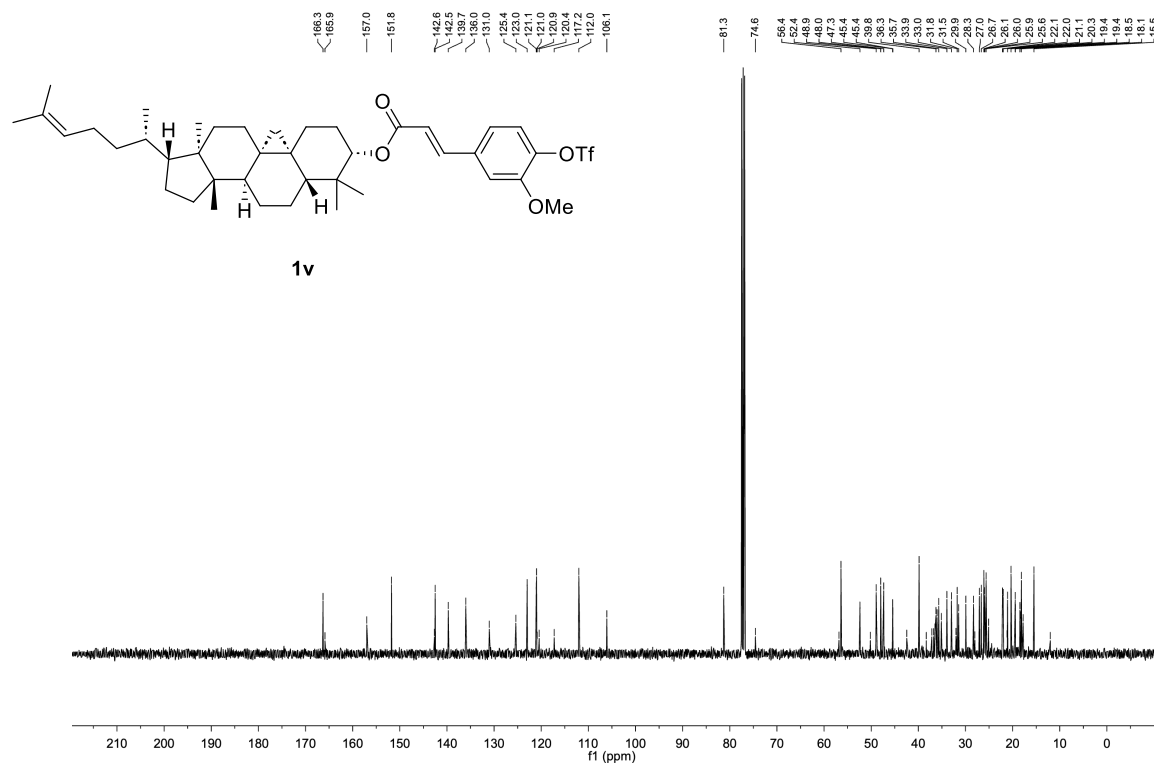

Figure S60. <sup>13</sup>C-NMR-spectrum (101 MHz, CDCl<sub>3</sub>) of **1v**.

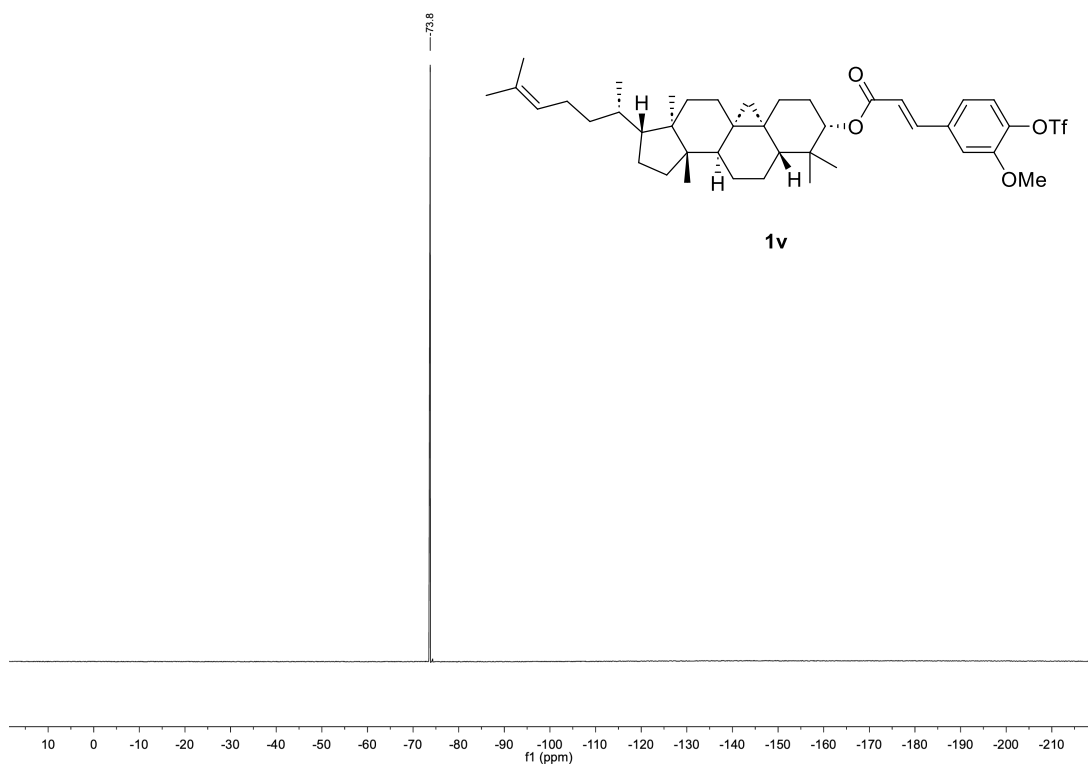

**Figure S61.**  $^{19}\text{F}$ -NMR-spectrum (376 MHz,  $\text{CDCl}_3$ ) of **1v**.



### Methyl 2',4'-difluoro-4-(((trifluoromethyl)sulfonyl)oxy)-[1,1'-biphenyl]-3-carboxylate (**1w**):

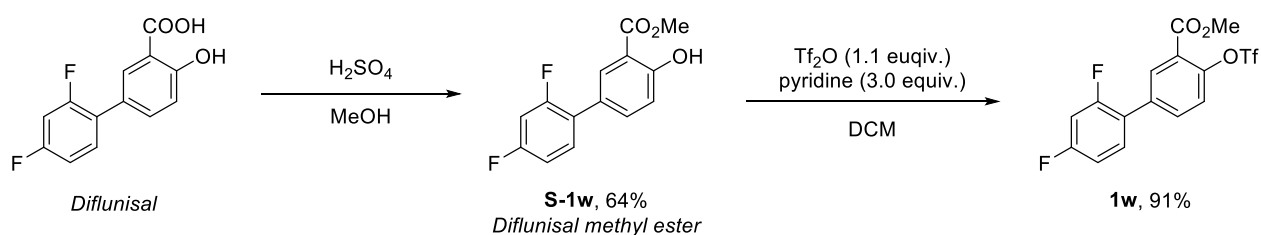

#### Step 1: **S-1w** (Diflunisal methyl ester) ( $\text{C}_{14}\text{H}_{10}\text{O}_3$ , 264.23 g/mol)

The synthesis of **S-1w** followed a literature procedure and was conducted under air.<sup>18</sup> In a 250 mL round-bottom flask, Diflunisal (5.00 g, 20.0 mmol, 1.0 equiv.) was dissolved in MeOH (100 mL) and aq.  $\text{H}_2\text{SO}_4$  (96%, 4 mL) was added. The mixture was heated to reflux under stirring for 16 h. After cooling to rt, the precipitate was collected by filtration, washed with MeOH (3 × 25 mL) and dried *in vacuo*. **S-1w** (3.39 g, 12.8 mmol, 64%) was obtained as colorless solid. Conforms to reported analytical data.<sup>18</sup>

<sup>1</sup>**H-NMR** (400 MHz,  $\text{CDCl}_3$ ,  $\delta$ ): 10.82 (s, 1H), 7.98 (s, 1H), 7.64 – 7.56 (m, 1H), 7.42 – 7.31 (m, 1H), 7.06 (d,  $J = 8.7$  Hz, 1H), 6.99 – 6.85 (m, 2H), 3.97 (s, 3H).

<sup>13</sup>**C-NMR** (101 MHz,  $\text{CDCl}_3$ ,  $\delta$ ): 170.5, 161.3, 161.1 (d,  $J = 13.0$  Hz), 136.3 (d,  $J = 3.0$  Hz), 131.2 (m), 130.3 (d,  $J = 2.9$  Hz), 126.2, 118.0, 112.6, 111.9 (d,  $J = 4.0$  Hz), 111.7 (d,  $J = 4.1$  Hz), 104.7 (d,  $J = 25.2$  Hz), 104.5 (d,  $J = 25.7$  Hz), 52.6.

Note: Observed complexity due to C–F coupling.

<sup>19</sup>**F-NMR** (376 MHz,  $\text{CDCl}_3$ ,  $\delta$ ): -111.4 (m), -113.8 (m).

Note: Observed complexity due to F–F/F–H coupling.

#### Step 2: **1w** ( $\text{C}_{15}\text{H}_9\text{F}_5\text{O}_5\text{S}$ , 396.28 g/mol)

Following **GP-A**, **1w** was synthesized using Diflunisal methyl ester (**S-1w**) (1.32 g, 5.00 mmol, 1.0 equiv.). Purification by column chromatography ( $\text{SiO}_2$ , *n*-hexane/EtOAc 90:10) afforded **1w** (1.81 g, 4.57 mmol, 91%) as a colorless oil.

**R<sub>f</sub>**: 0.53 (*n*-hexane/EtOAc 90:10).

<sup>1</sup>**H-NMR** (400 MHz,  $\text{CDCl}_3$ ,  $\delta$ ): 8.23 – 8.17 (m, 1H), 7.80 – 7.71 (m, 1H), 7.48 – 7.34 (m, 2H), 7.06 – 6.90 (m, 2H), 3.99 (s, 3H).

<sup>13</sup>**C-NMR** (101 MHz,  $\text{CDCl}_3$ ,  $\delta$ ): 164.3, 163.1 (dd,  $J = 251.1, 11.9$  Hz), 159.8 (dd,  $J = 251.1, 11.9$  Hz), 147.6, 135.6, 134.5 (d,  $J = 3.6$  Hz), 133.0 (d,  $J = 2.8$  Hz), 131.4 (dd,  $J = 9.8, 4.1$  Hz), 124.6, 123.0, 122.5

(dd,  $J = 13.1, 3.8$  Hz), 118.8 (q,  $J = 320.8$  Hz), 112.1 (dd,  $J = 21.5, 3.7$  Hz), 104.7 (dd,  $J = 25.9, 25.9$  Hz), 52.7.

$^{19}\text{F-NMR}$  (376 MHz,  $\text{CDCl}_3$ ,  $\delta$ ): -73.7, -109.0 (m), -113.3 (m).

*Note:* Observed complexity due to F–F/F–H splitting.

**HR-MS** (ESI):  $m/z$  calc for  $[\text{M}+\text{Na}]^+$  418.99831, found 418.99866.

**IR** (ATR,  $\tilde{\nu}$  [ $\text{cm}^{-1}$ ]): 2957 (w), 1730 (s), 1612 (w), 1511 (w), 1482 (m), 1425 (s), 1314 (m), 1254 (s), 1205 (vs), 1135 (vs), 1105 (s), 1075 (s), 1038 (w), 967 (m), 889 (vs), 843 (vs), 818 (s), 784 (m), 733 (w), 684 (w).

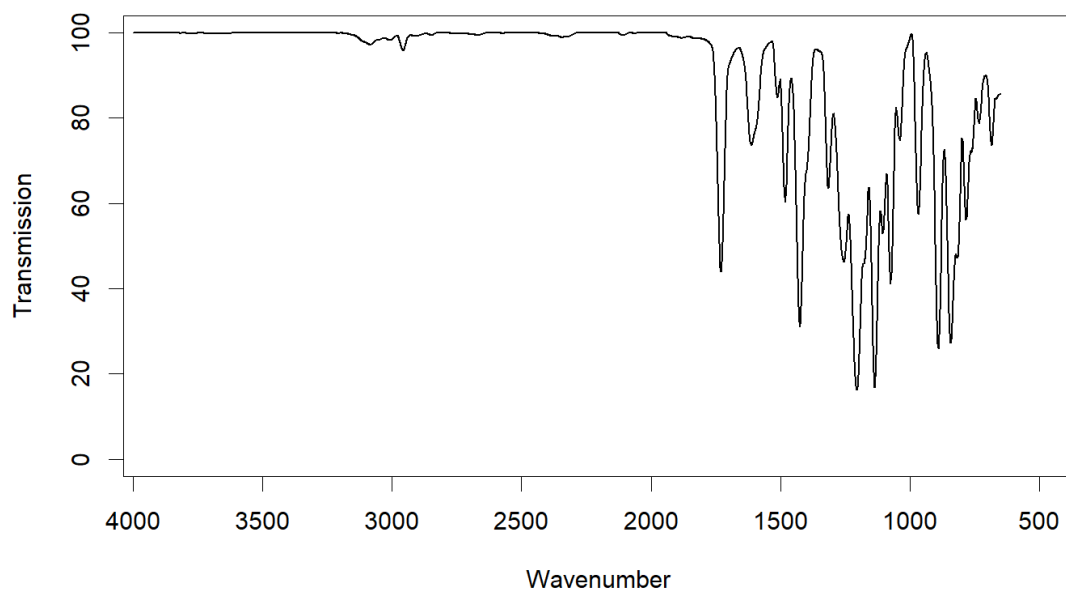

**Figure S62.** IR-spectrum (ATR, neat) of **1w**.

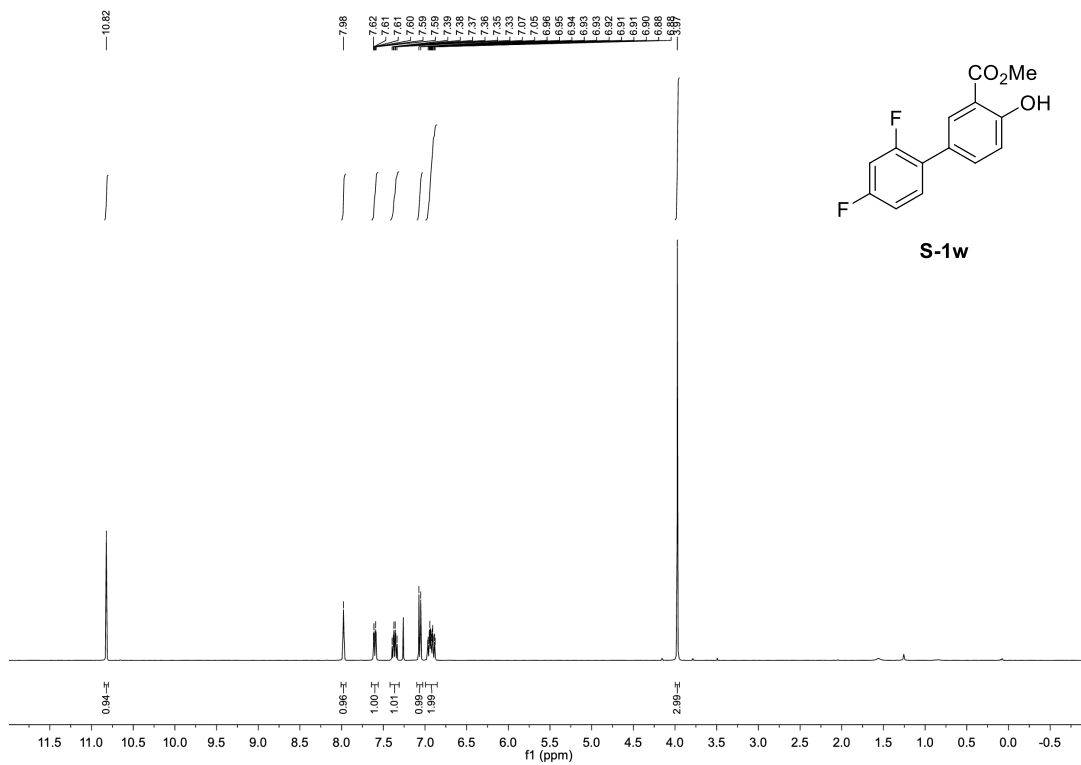

Figure S63. <sup>1</sup>H-NMR-spectrum (400 MHz, CDCl<sub>3</sub>) of S-1w.

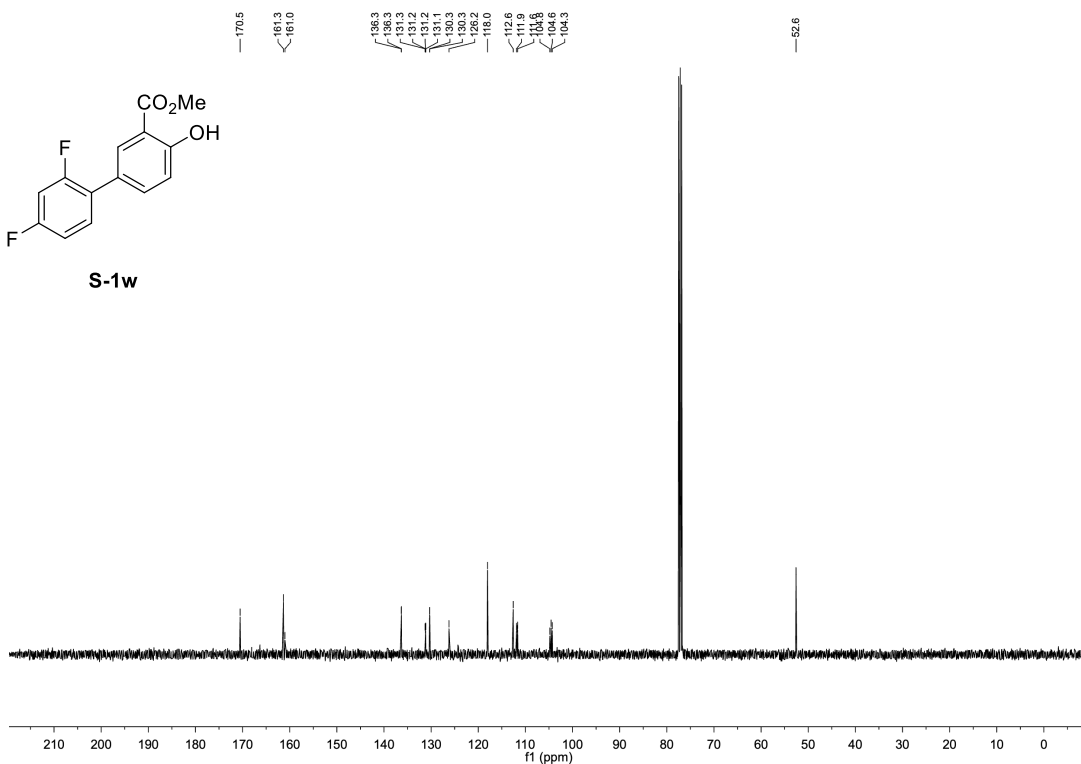

Figure S64. <sup>13</sup>C-NMR-spectrum (101 MHz, CDCl<sub>3</sub>) of S-1w.

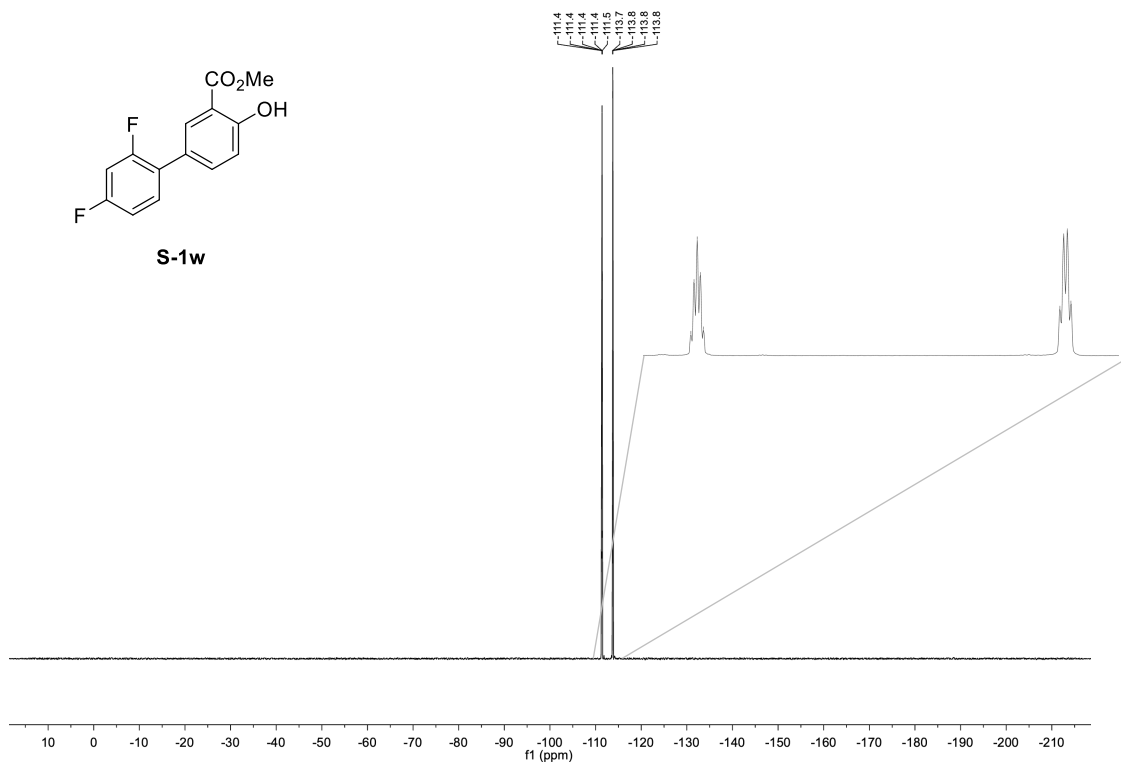

Figure S65. <sup>19</sup>F-NMR-spectrum (376 MHz, CDCl<sub>3</sub>) of **S-1w**.

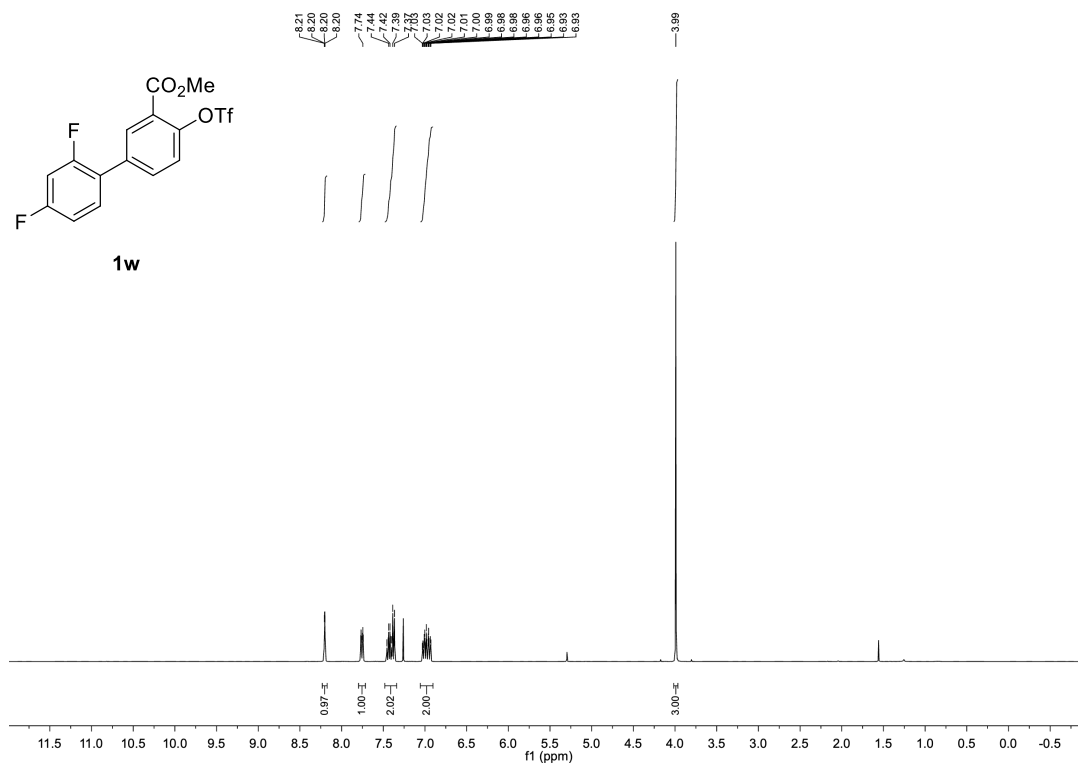

Figure S66. <sup>1</sup>H-NMR-spectrum (400 MHz, CDCl<sub>3</sub>) of **1w**.

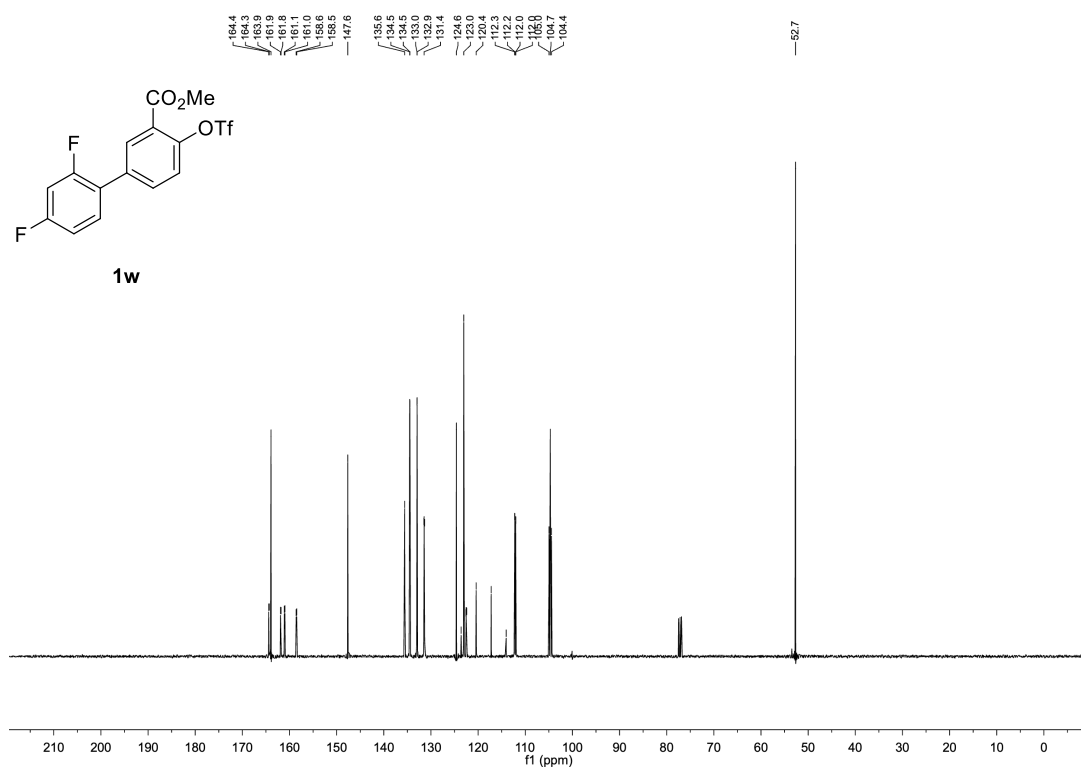

Figure S67. <sup>13</sup>C-NMR-spectrum (101 MHz, CDCl<sub>3</sub>) of **1w**.

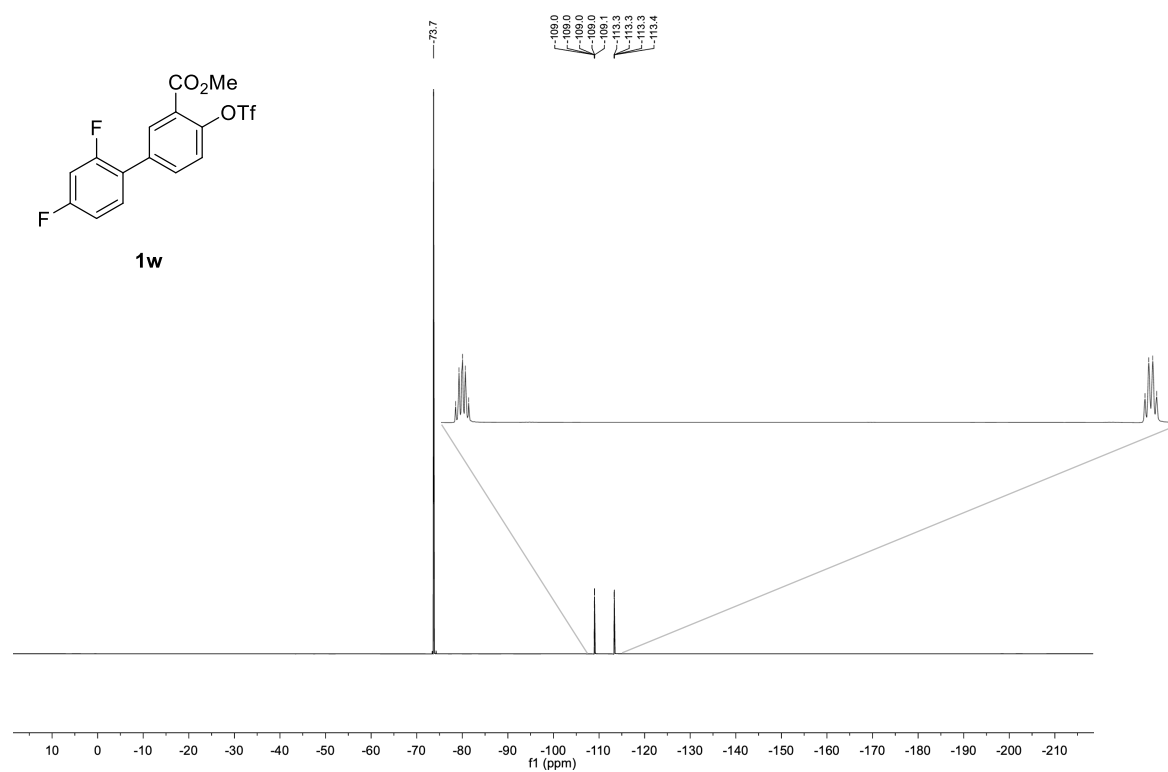

Figure S68. <sup>19</sup>F-NMR-spectrum (376 MHz, CDCl<sub>3</sub>) of **1w**.

**Ethyl 2-(3-formyl-4-(((trifluoromethyl)sulfonyl)oxy)phenyl)-4-methylthiazole-5-carboxylate (1x):**

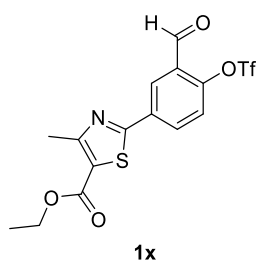

$C_{15}H_{12}F_3NO_6S_2$  (423.38 g/mol)

Following **GP-A**, **1x** was synthesized using methyl 2-(3-formyl-4-hydroxyphenyl)-4-methylthiazole-5-carboxylate (2.91 g, 10.0 mmol, 1.0 equiv.). Purification by column chromatography ( $SiO_2$ , *n*-hexane/EtOAc 80:20) afforded **1x** (2.44 g, 5.76 mmol, 58%) as a colorless solid.

**R<sub>f</sub>**: 0.54 (*n*-hexane/EtOAc 80:20).

**m. p.**: 91.2 – 92.5 °C.

**<sup>1</sup>H-NMR** (400 MHz,  $CDCl_3$ ,  $\delta$ ): 10.30 (s, 1H), 8.52 (d,  $J = 2.4$  Hz, 1H), 8.32 (dd,  $J = 8.6, 2.4$  Hz, 1H), 7.51 (d,  $J = 8.6$  Hz, 1H), 4.37 (q,  $J = 7.1$  Hz, 2H), 2.79 (s, 3H), 1.40 (t,  $J = 7.1$  Hz, 3H).

**<sup>13</sup>C-NMR** (101 MHz,  $CDCl_3$ ,  $\delta$ ): 185.8, 165.8, 161.9, 161.5, 150.8, 134.0, 133.5, 129.1, 129.0, 123.8, 123.5, 118.8 (q,  $J = 320.7$  Hz), 61.7, 17.6, 14.4.

**<sup>19</sup>F-NMR** (376 MHz,  $CDCl_3$ ,  $\delta$ ): -72.6.

**HR-MS** (ESI):  $m/z$  calc for  $[M+Na]^+$  445.99503, found 445.99550.

**IR** (ATR,  $\bar{\nu}$  [ $cm^{-1}$ ]): 2980 (w), 1698 (s), 1604 (w), 1582 (w), 1515 (w), 1482 (w), 1419 (s), 1366 (m), 1321 (w), 1269 (s), 1250 (s), 1206 (vs), 1135 (s), 1094 (vs), 1012 (m), 907 (s), 863 (s), 826 (vs), 755 (s), 710 (m).

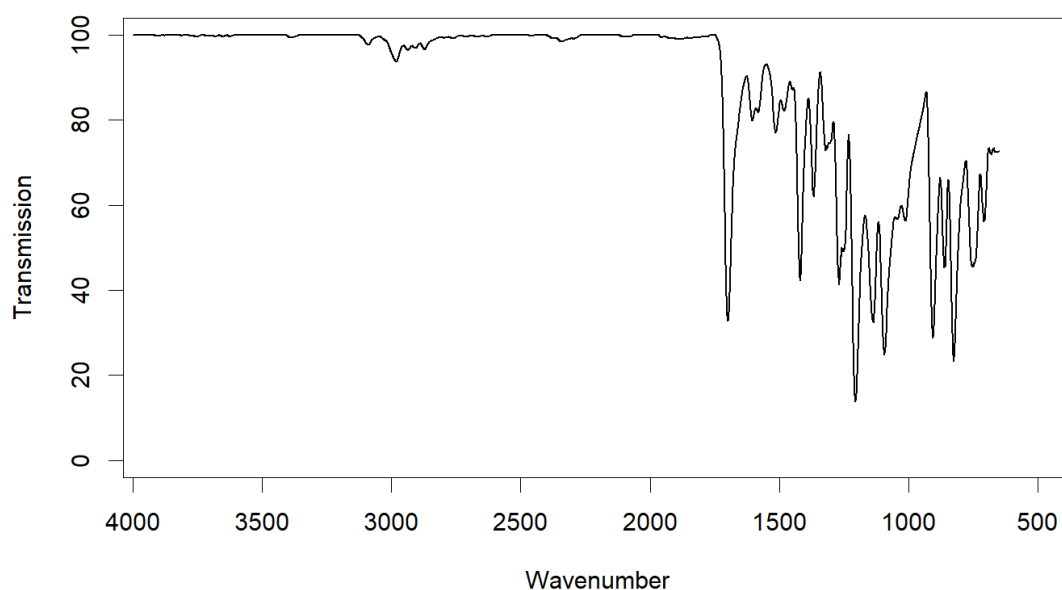

**Figure S69.** IR-spectrum (ATR, neat) of **1x**.

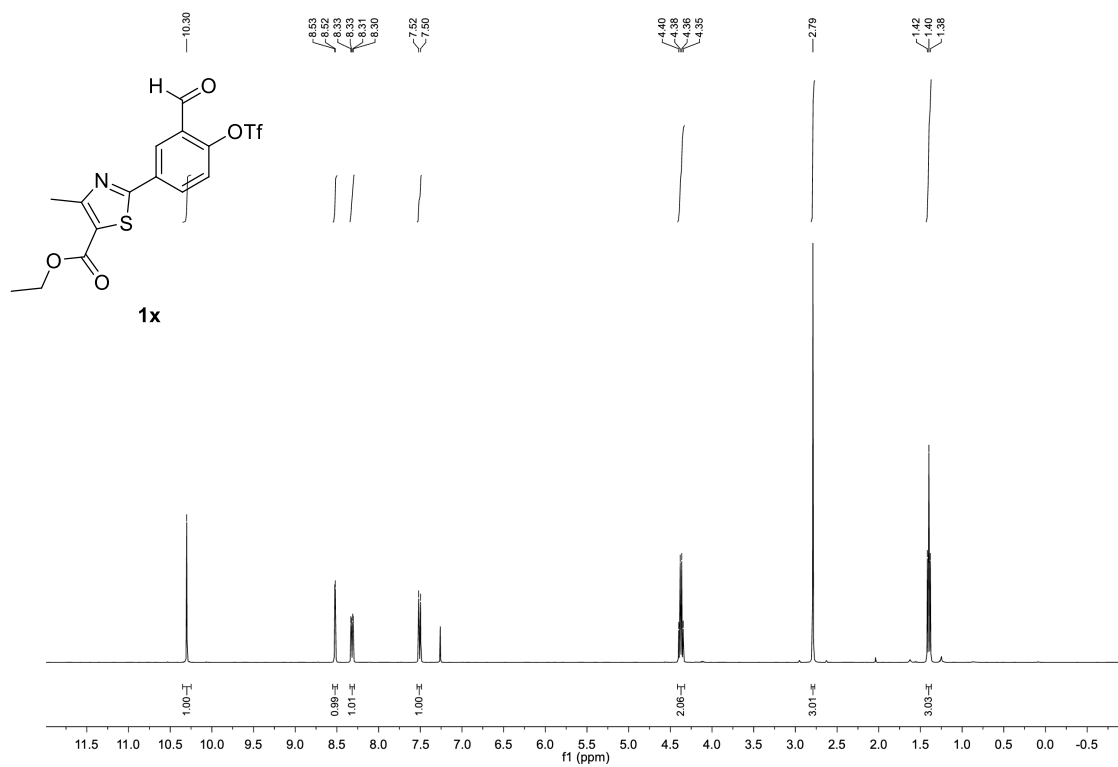

Figure S70.  $^1\text{H}$ -NMR-spectrum (400 MHz,  $\text{CDCl}_3$ ) of **1x**.

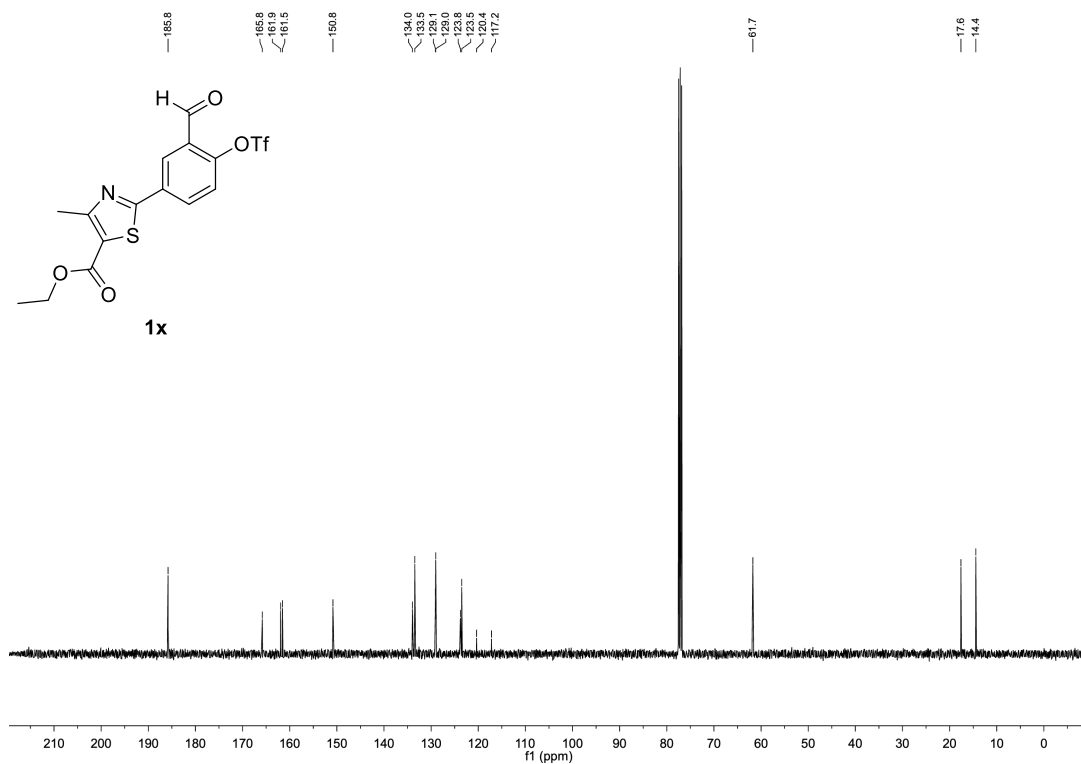

Figure S71.  $^{13}\text{C}$ -NMR-spectrum (101 MHz,  $\text{CDCl}_3$ ) of **1x**.

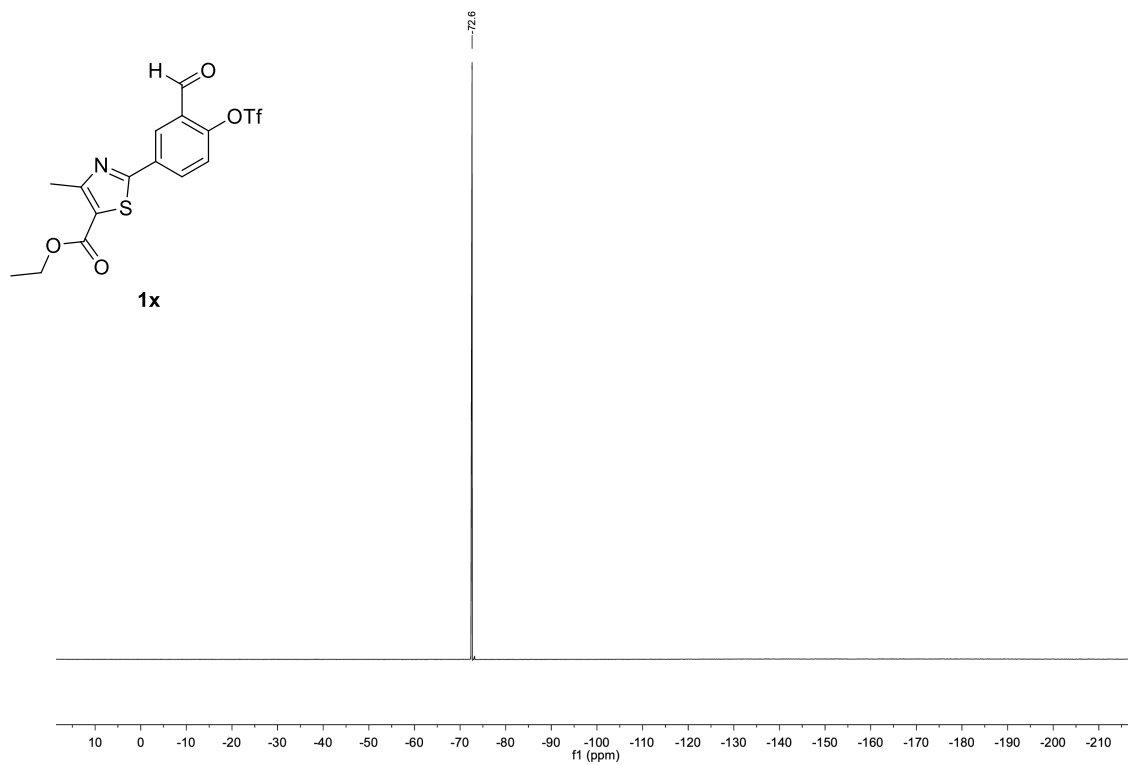

**Figure S72.**  $^{19}\text{F}$ -NMR-spectrum (376 MHz,  $\text{CDCl}_3$ ) of **1x**.



**Pyren-1-yl trifluoromethanesulfonate (1y):**

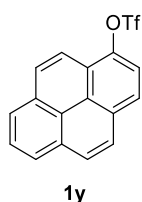

C<sub>17</sub>H<sub>9</sub>F<sub>3</sub>O<sub>3</sub>S (350.31 g/mol)

Following **GP-A**, **1y** was synthesized using pyren-1-ol (1.04 g, 4.77 mmol, 1.0 equiv.). Purification by column chromatography (SiO<sub>2</sub>, *n*-hexane/EtOAc 90:10) afforded **1y** (984 mg, 2.81 mmol, 59%) as a pale yellow solid.

**R<sub>f</sub>**: 0.66 (*n*-hexane/EtOAc 90:10).

**Note:** The compound showed fluorescence on the TLC plate under 356 nm irradiation.

**m. p.:** 83 °C.

**<sup>1</sup>H-NMR** (400 MHz, CDCl<sub>3</sub>, δ): 8.28 – 8.16 (m, 4H), 8.12 (d, *J* = 8.5 Hz, 1H), 8.09 – 7.98 (m, 3H), 7.94 (d, *J* = 8.5 Hz, 1H).

**<sup>13</sup>C-NMR** (101 MHz, CDCl<sub>3</sub>, δ): 142.7, 131.0, 131.0, 130.7, 129.8, 128.6, 127.0, 126.8, 126.5, 126.2, 125.7, 125.1, 124.0, 123.7, 119.4, 119.0 (q, *J* = 320.4 Hz), 118.7.

**<sup>19</sup>F-NMR** (376 MHz, CDCl<sub>3</sub>, δ): -73.1.

**HR-MS** (ESI): *m/z* calc for [M+Na]<sup>+</sup> 373.01167, found 373.01219.

**IR** (ATR,  $\tilde{\nu}$  [cm<sup>-1</sup>]): 3058 (w), 1594 (w), 1488 (w), 1458 (w), 1415 (s), 1243 (w), 1202 (vs), 1131 (s), 1083 (s), 1038 (s), 968 (w), 900 (s), 836 (s), 818 (s), 756 (s), 714 (s), 676 (m).

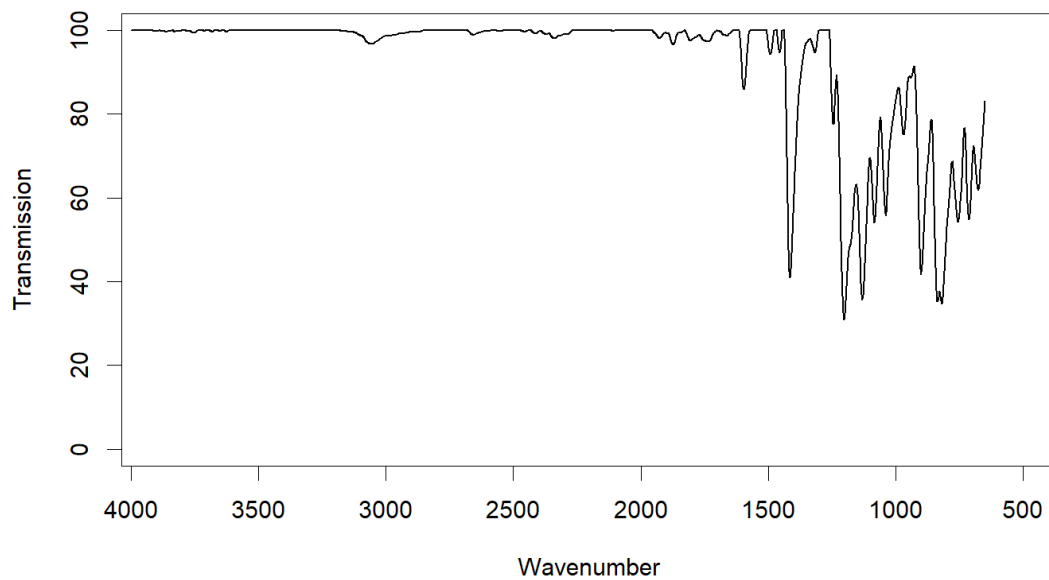

Figure S73. IR-spectrum (ATR, neat) of **1o**.

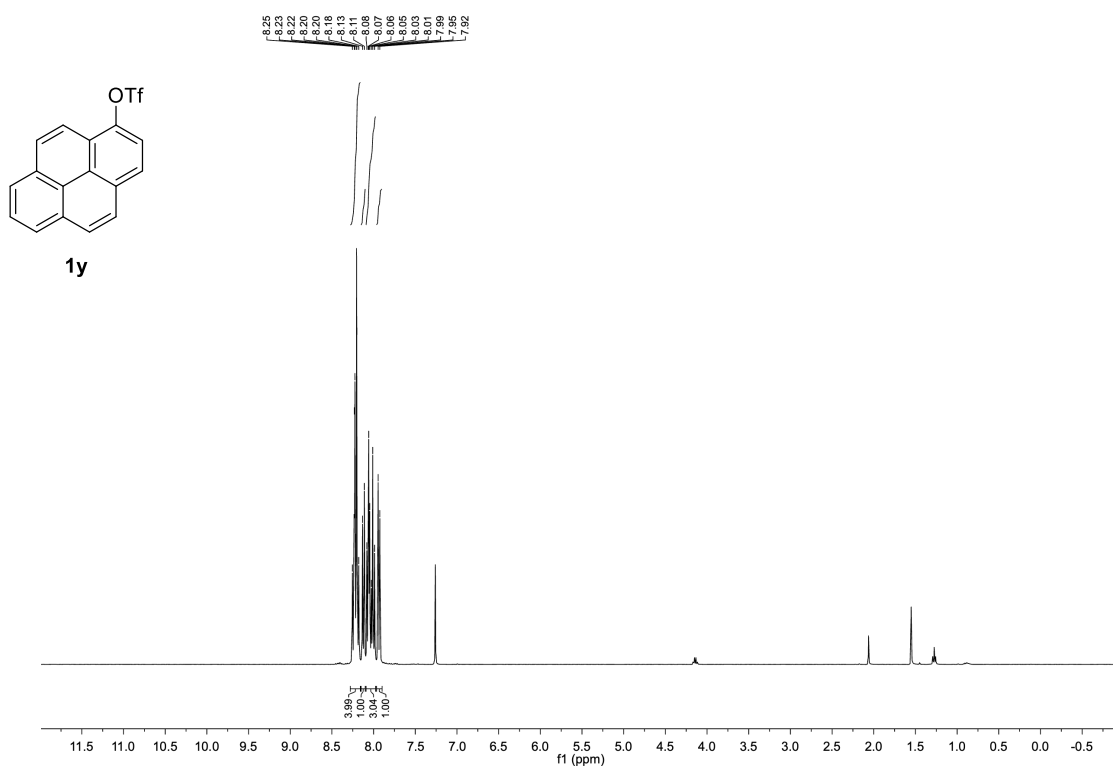

Figure S74. <sup>1</sup>H-NMR-spectrum (400 MHz, CDCl<sub>3</sub>) of **1y**.

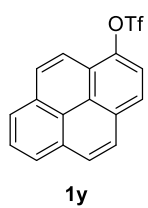

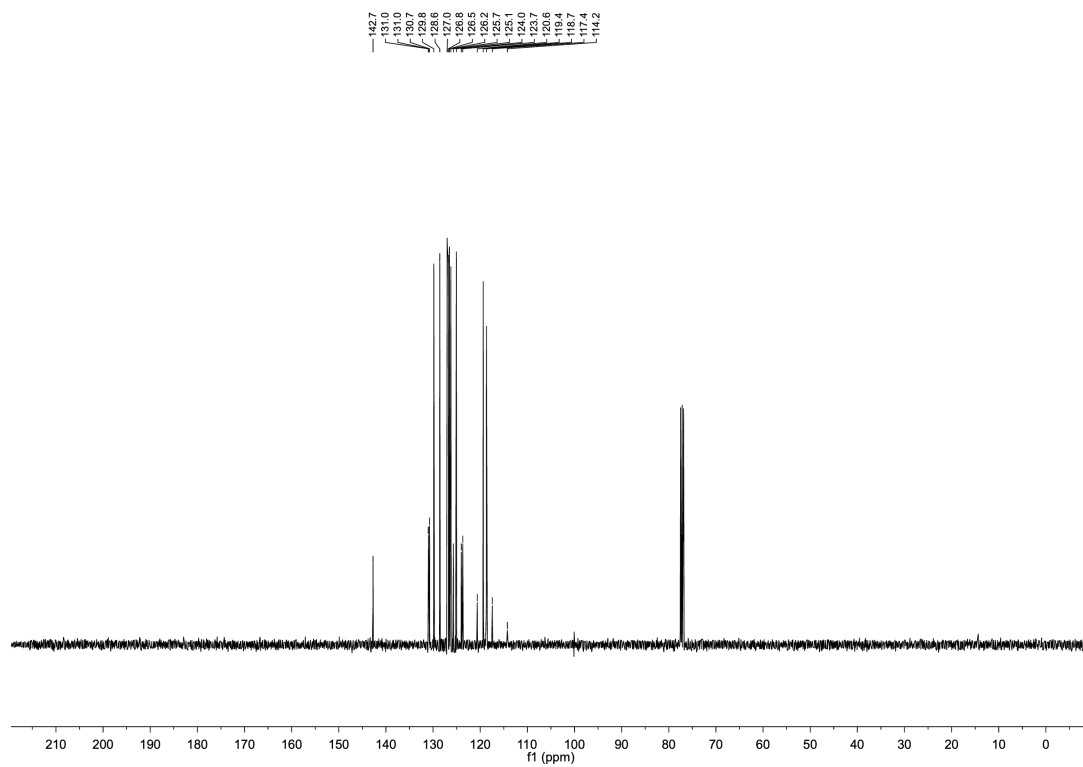

Figure S75.  $^{13}\text{C}$ -NMR-spectrum (101 MHz,  $\text{CDCl}_3$ ) of **1y**.

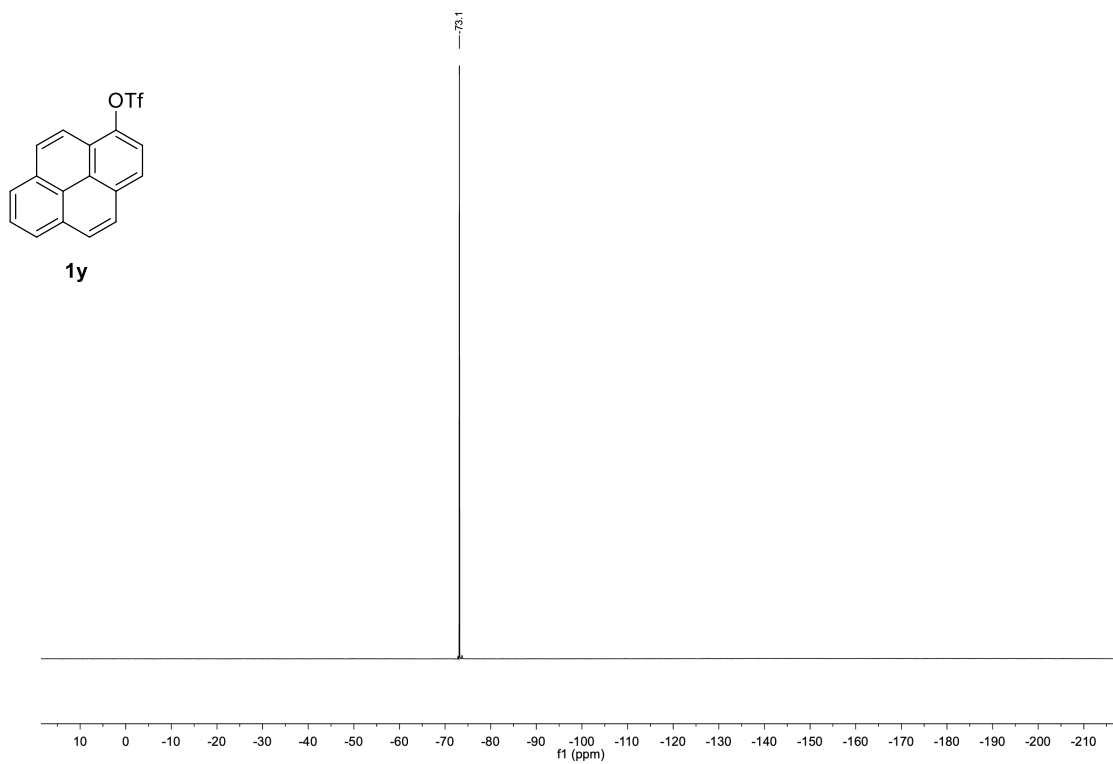

Figure S76.  $^{19}\text{F}$ -NMR-spectrum (376 MHz,  $\text{CDCl}_3$ ) of **1y**.

### 3-Bromo-2-methylphenyl trifluoromethanesulfonate (**1z**):

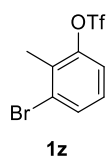

C<sub>8</sub>H<sub>6</sub>BrF<sub>3</sub>O<sub>3</sub>S (319.09 g/mol)

Following **GP-A**, **1z** was synthesized using 3-bromo-2-methylphenol (1.00 g, 5.35 mmol, 1.0 equiv.). Purification by column chromatography (SiO<sub>2</sub>, *n*-hexane/EtOAc 95:5) afforded **1z** (1.49 g, 4.67 mmol, 87%) as a colorless oil.

R<sub>f</sub>: 0.89 (*n*-hexane/EtOAc 90:10).

<sup>1</sup>H-NMR (400 MHz, CDCl<sub>3</sub>, δ): 7.59 (d, *J* = 8.0 Hz, 1H), 7.24 (d, *J* = 8.2 Hz, 1H), 7.15 (dd, *J* = 8.2, 8.0 Hz, 1H), 2.45 (s, 3H).

<sup>13</sup>C-NMR (101 MHz, CDCl<sub>3</sub>, δ): 148.4, 132.7, 131.9, 128.1, 126.8, 120.7, 118.7 (q, *J* = 320.4 Hz), 17.1.

<sup>19</sup>F-NMR (376 MHz, CDCl<sub>3</sub>, δ): -73.6.

HR-MS (APCI): *m/z* calc for [M+H]<sup>+</sup> 317.91676, found 317.91731.

IR (ATR,  $\tilde{\nu}$  [cm<sup>-1</sup>]): 1567 (w), 1418 (vs), 1206 (vs), 1135 (vs), 1109 (s), 1001 (s), 885 (vs), 787 (vs), 751 (m), 699 (m).

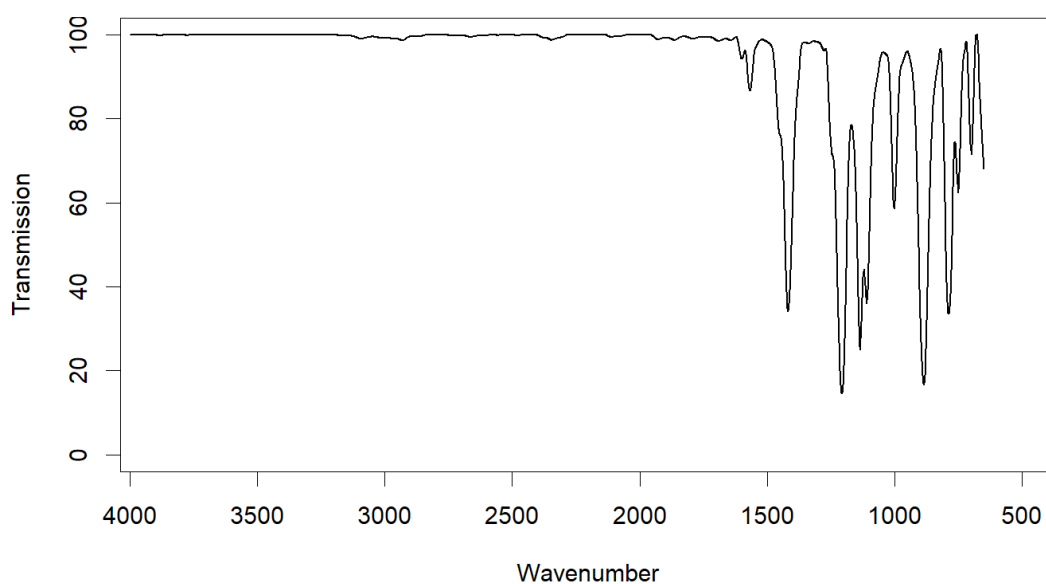

Figure S77. IR-spectrum (ATR, neat) of **1z**.

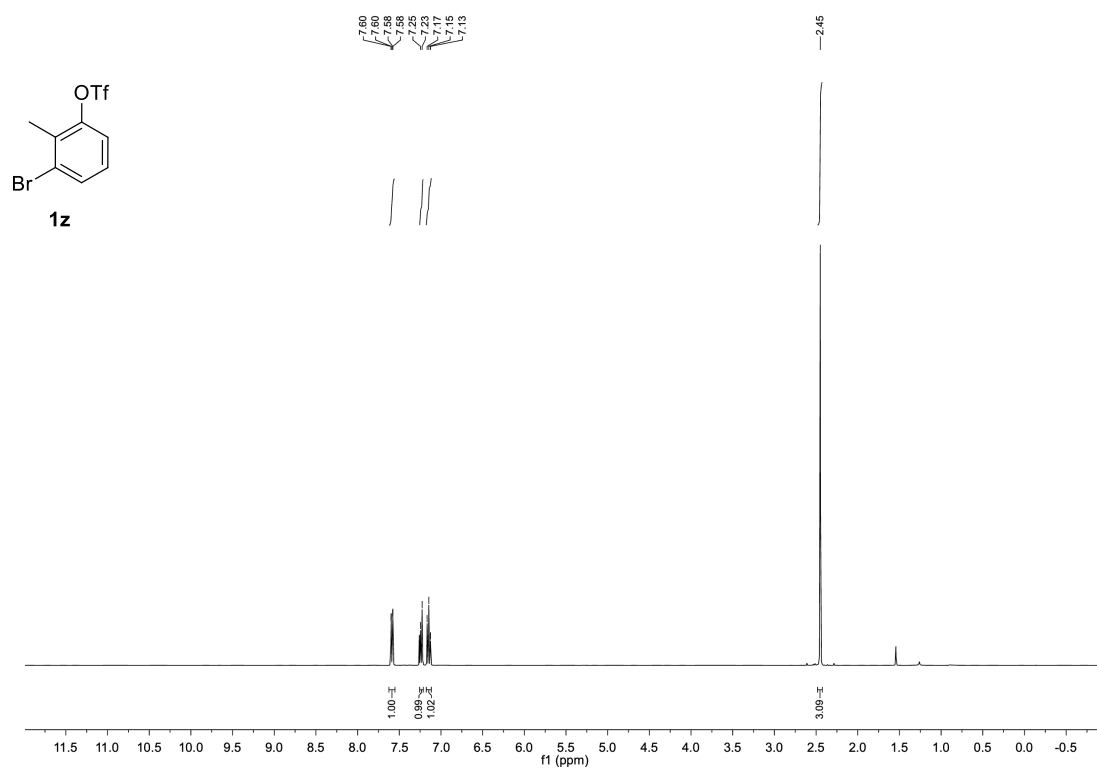

Figure S78. <sup>1</sup>H-NMR-spectrum (400 MHz, CDCl<sub>3</sub>) of **1z**.

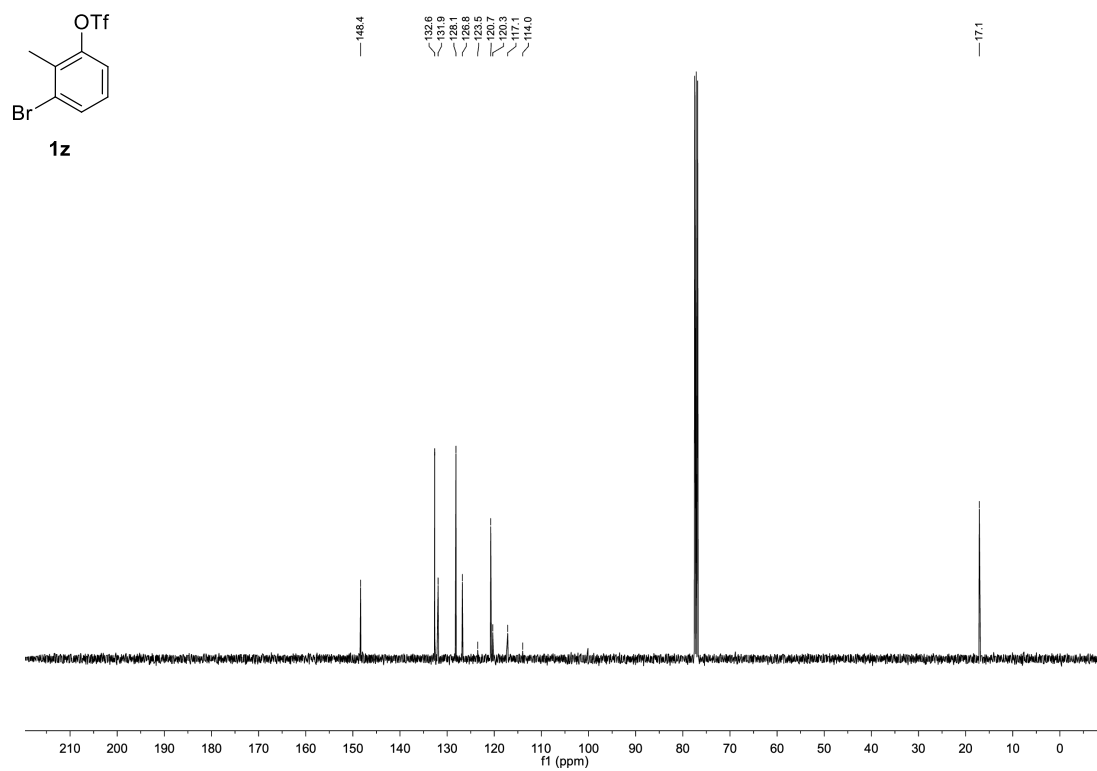

Figure S79. <sup>13</sup>C-NMR-spectrum (101 MHz, CDCl<sub>3</sub>) of **1z**.

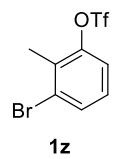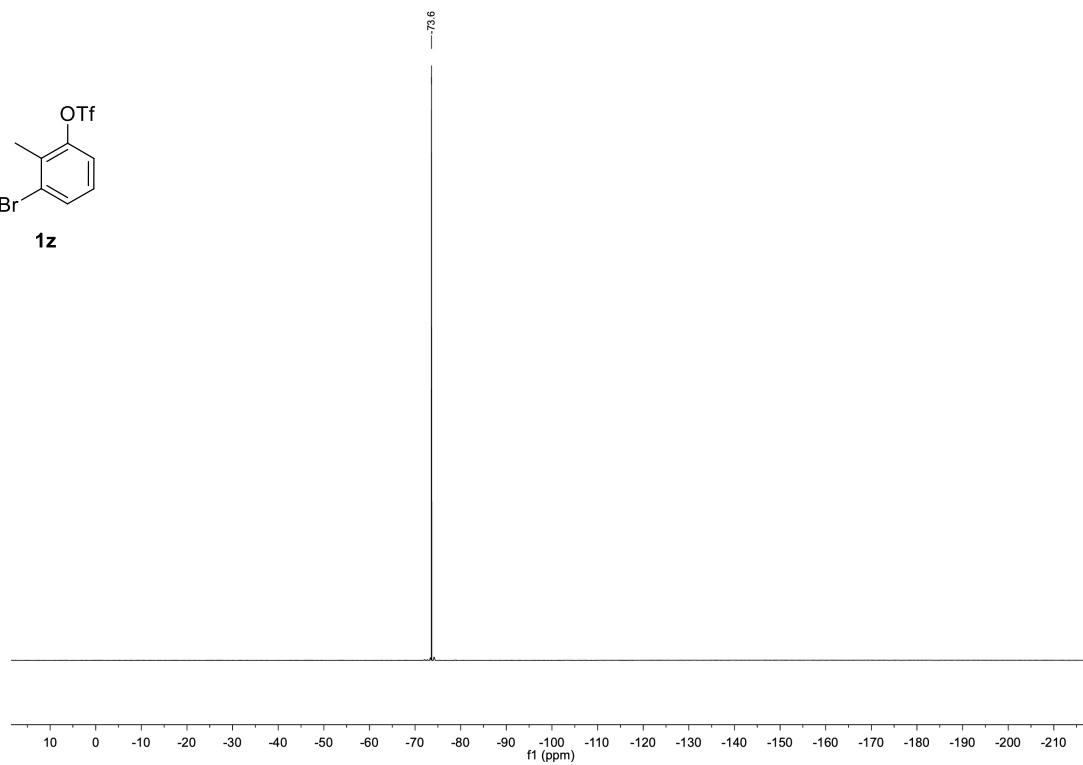

**Figure S80.**  $^{19}\text{F}$ -NMR-spectrum (376 MHz,  $\text{CDCl}_3$ ) of **1z**.

### 3-Chloro-2-methylphenyl trifluoromethanesulfonate (**1A**):

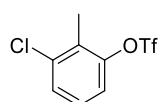

**1A**

$C_8H_6ClF_3O_3S$  (274.64 g/mol)

Following **GP-A**, **1A** was synthesized using 3-chloro-2-methylphenol (1.31 g, 9.19 mmol, 1.0 equiv.). Purification by column chromatography ( $SiO_2$ , *n*-hexane/EtOAc 95:5) afforded **1A** (2.17 g, 7.90 mmol, 79%) as a colorless oil.

$R_f$ : 0.82 (*n*-hexane/EtOAc 95:5).

$^1H$ -NMR (400 MHz,  $CDCl_3$ ,  $\delta$ ): 7.41 (dd,  $J = 7.0, 2.2$  Hz, 1H), 7.25 – 7.16 (m, 2H), 2.46 – 2.37 (m, 7H).

$^{13}C$ -NMR (101 MHz,  $CDCl_3$ ,  $\delta$ ): 148.7, 136.6, 130.3, 129.4, 127.6, 120.1, 118.7 (q,  $J = 320.1$  Hz), 14.1.

$^{19}F$ -NMR (376 MHz,  $CDCl_3$ ,  $\delta$ ): -73.6.

HR-MS (APCI):  $m/z$  calc for  $[M]^{*+}$  273.96728, found 273.96760.

IR (ATR,  $\bar{\nu}$  [ $cm^{-1}$ ]): 1571 (w), 1452 (m), 1419 (s), 1209 (vs), 1132 (vs), 1012 (s), 894 (vs), 792 (s), 755 (m), 703 (w), 660 (w).

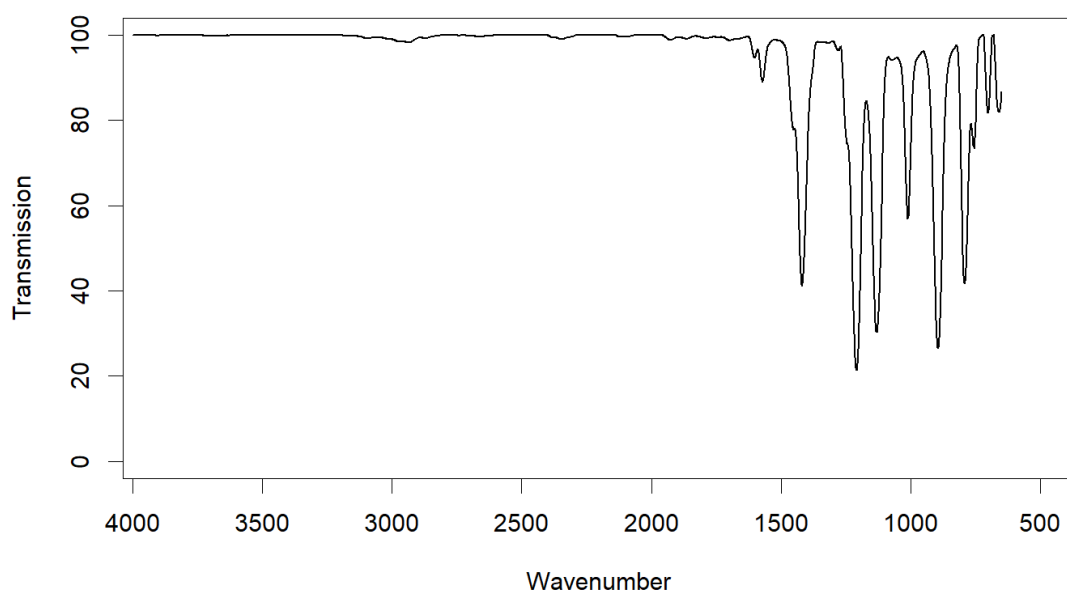

**Figure S81.** IR-spectrum (ATR, neat) of **1A**.

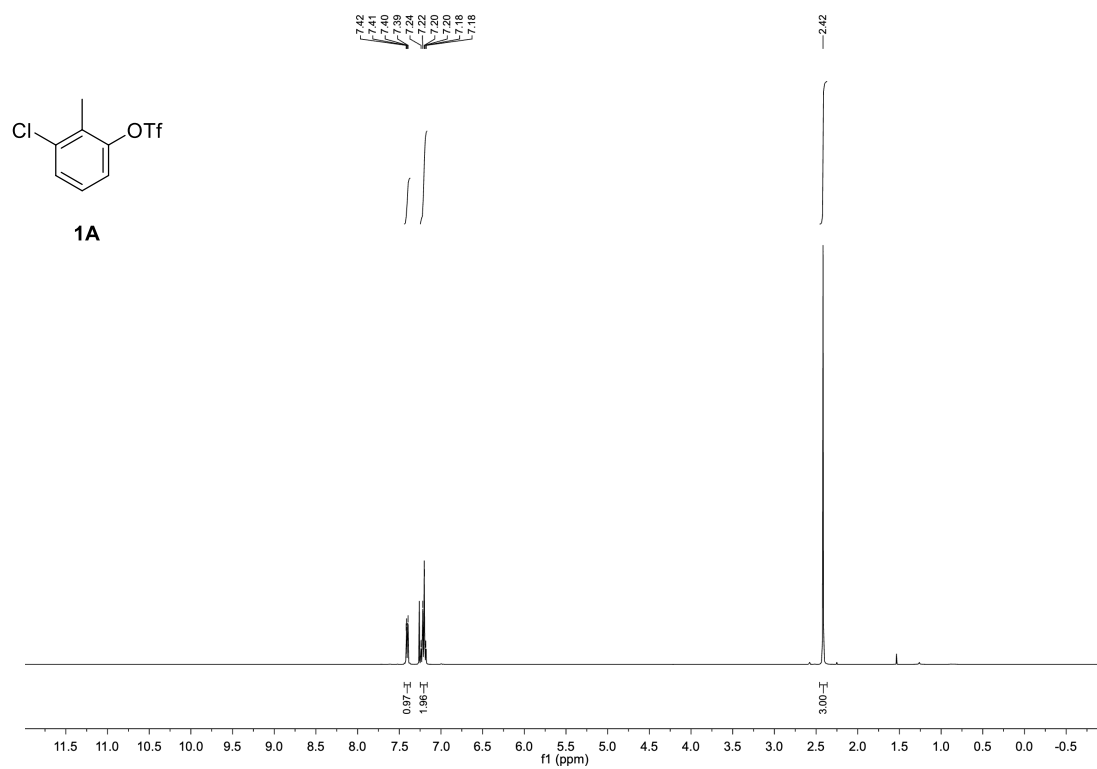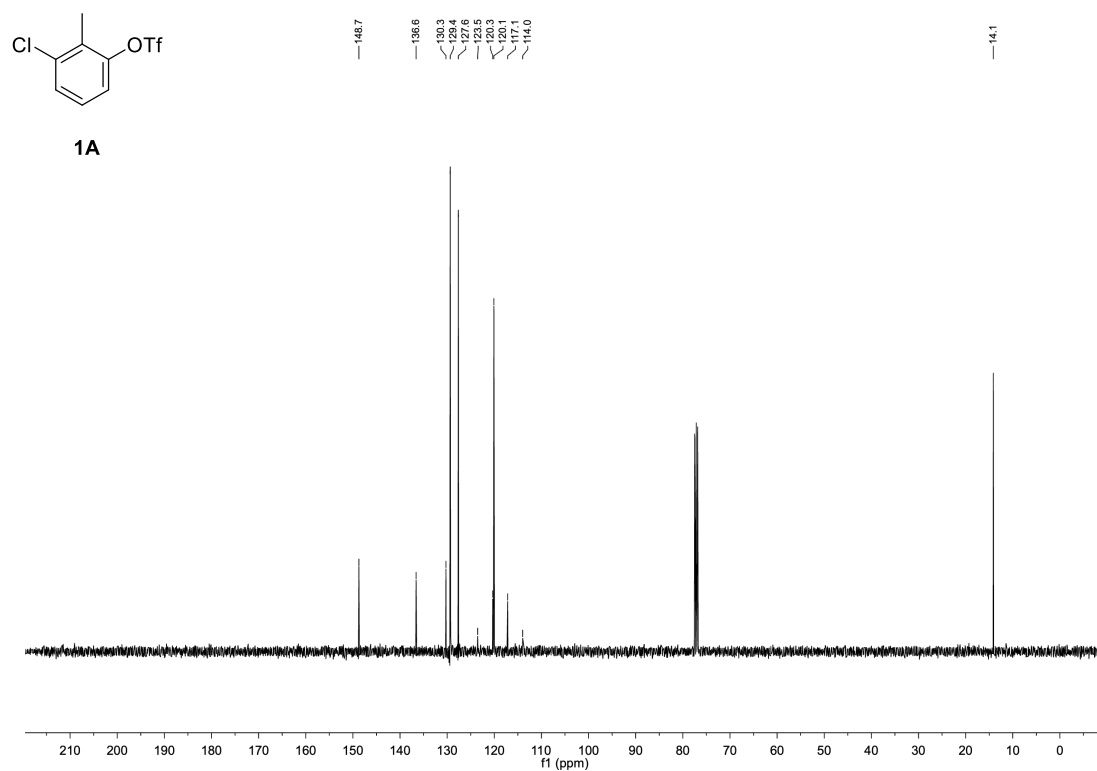



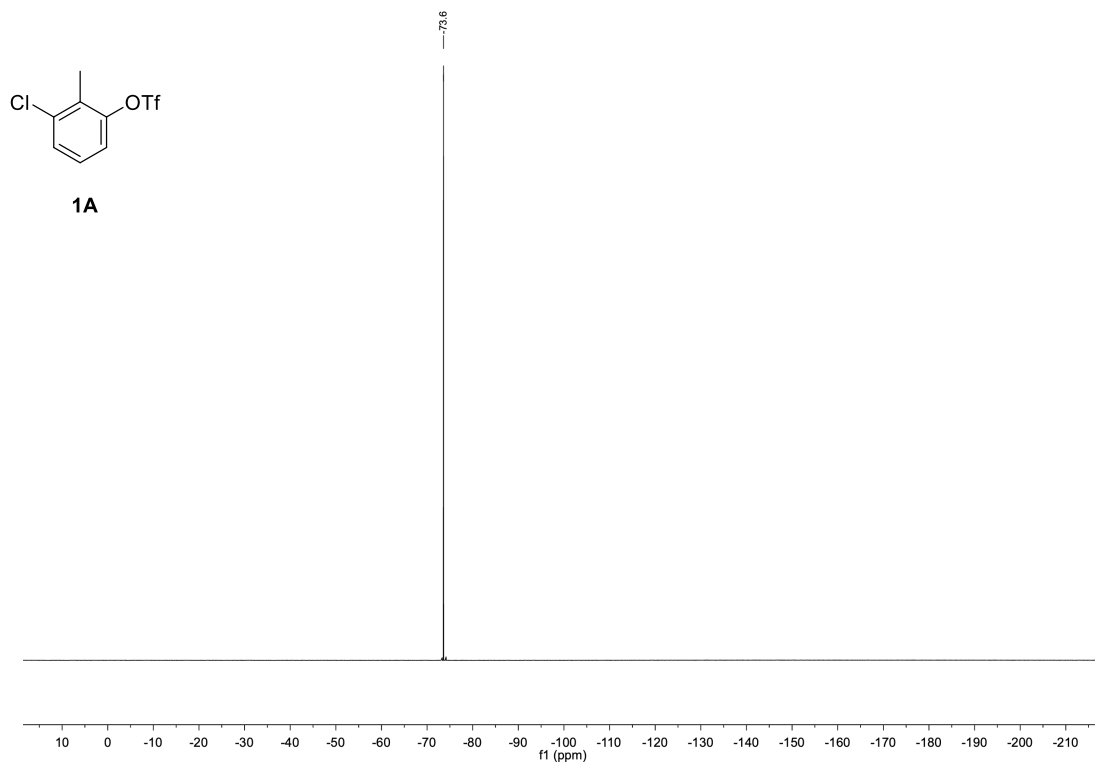

**Figure S84.**  $^{19}\text{F}$ -NMR-spectrum (376 MHz,  $\text{CDCl}_3$ ) of **1A**.

### 5.3 Synthesis of *ortho*-substituted aryl alkyl thioethers

#### [1,1'-biphenyl]-2-yl((1*s*,3*s*)-adamantan-1-yl)sulfane (**3ab**):

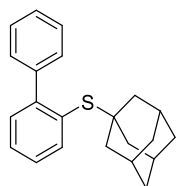

**3ab**

C<sub>22</sub>H<sub>24</sub>S (320.49 g/mol)

Following **GP-B**, **3ab** was synthesized using [1,1'-biphenyl]-2-yl trifluoromethanesulfonate (**1a**) (302 mg, 1.00 mmol, 1.0 equiv.) and 1-adamantane thiol (**2b**) (177 mg, 1.05 mmol, 1.05 equiv.). The reaction time was shortened to 2 h. Purification by flash chromatography (SiO<sub>2</sub>, gradient *n*-hexane/EtOAc 100:0 to 95:5 over 10 CV) afforded **3ab** (297 mg, 927 μmol, 93%) as colorless oil.

R<sub>f</sub>: 0.3 (*n*-hexane).

<sup>1</sup>H-NMR (400 MHz, CDCl<sub>3</sub>, δ): 7.73 (m, 1H), 7.45 – 7.30 (m, 8H), 1.94 – 1.87 (m, 3H), 1.62 – 1.48 (m, 12H).

<sup>13</sup>C-NMR (101 MHz, CDCl<sub>3</sub>, δ): 148.7, 142.2, 139.8, 130.8, 130.8, 129.2, 128.8, 127.4, 126.9, 126.9, 49.7, 43.7, 36.2, 30.1.

HR-MS (APCI): *m/z* calc for [M+H]<sup>+</sup> 321.16715, found 321.16727.

IR (ATR,  $\bar{\nu}$  [cm<sup>-1</sup>]): 3054 (w), 2901 (s), 2846 (m), 1452 (m), 1422 (m), 1343 (w), 1295 (w), 1247 (w), 1210 (m), 1139 (m), 1101 (w), 1072 (w), 1034 (m), 1005 (w), 974 (w), 885 (m), 822 (w), 742 (s), 695 (s).

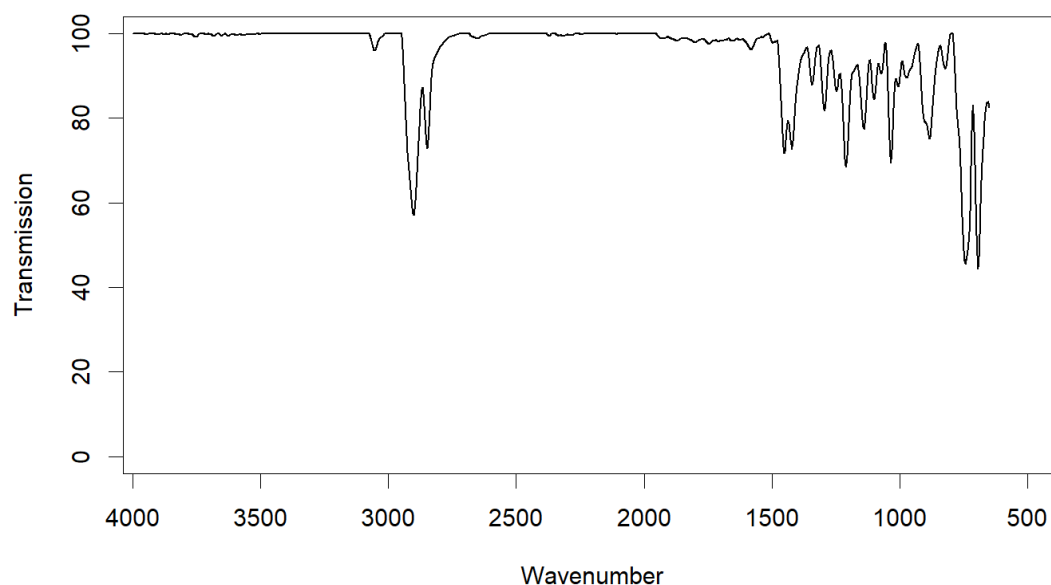

Figure S85. IR-spectrum (ATR, neat) of **3ab**.

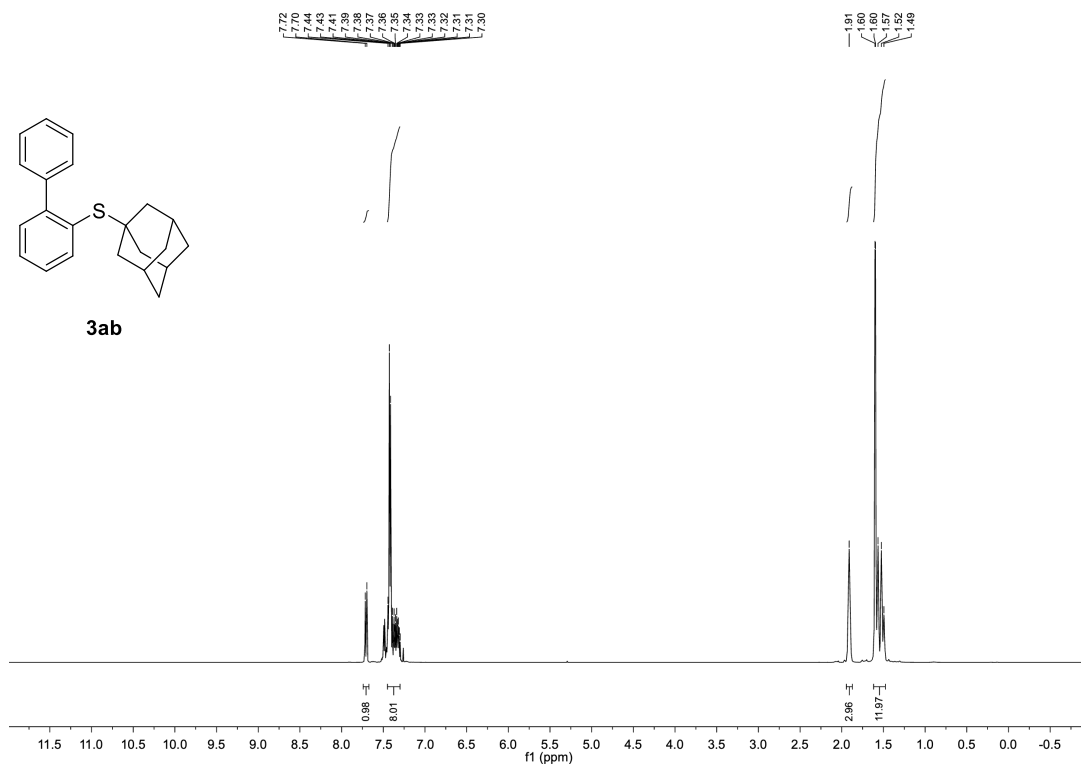

**Figure S86.** <sup>1</sup>H-NMR-spectrum (400 MHz, CDCl<sub>3</sub>) of **3ab**.

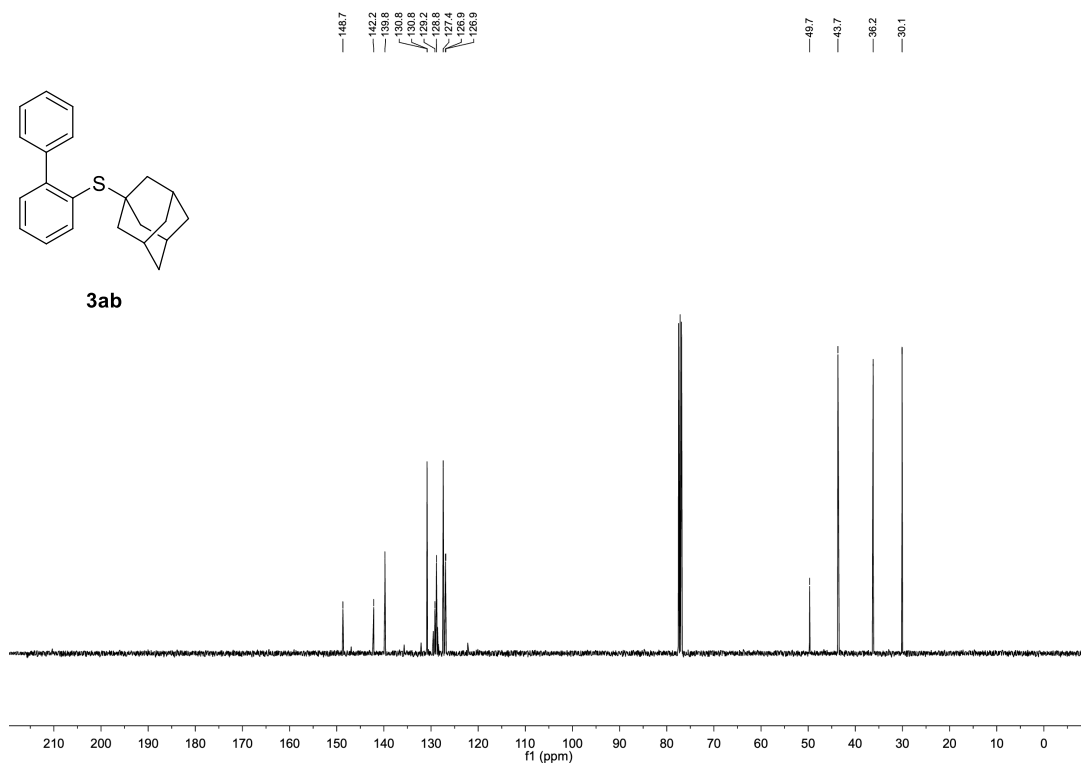

**Figure S87.** <sup>13</sup>C-NMR-spectrum (101 MHz, CDCl<sub>3</sub>) of **3ab**.

**((1*s*,3*s*)-Adamantan-1-yl)(2-ethylphenyl)sulfane (**3bb**):**

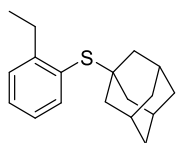

**3bb**

$C_{18}H_{24}S$  (272.45 g/mol)

Following **GP-B**, **3bb** was synthesized using 2-ethylphenyl trifluoromethanesulfonate (**1b**) (254 mg, 1.00 mmol, 1.0 equiv.) and 1-adamantane thiol (**2b**) (177 mg, 1.05 mmol, 1.05 equiv.). The reaction time was shortened to 2 h. Purification by flash chromatography ( $SiO_2$ , gradient *n*-hexane/EtOAc 100:0 to 95:5 over 10 CV) afforded **3bb** (236 mg, 866  $\mu$ mol, 87%) as colorless solid.

**R<sub>f</sub>**: 0.46 (*n*-hexane/EtOAc 95:5).

**m. p.**: 46.2 – 48.5 °C.

**<sup>1</sup>H-NMR** (400 MHz,  $CDCl_3$ ,  $\delta$ ): 7.54 – 7.50 (m, 1H), 7.33 – 7.27 (m, 2H), 7.18 – 7.11 (m, 1H), 2.99 (q, *J* = 7.5 Hz, 2H), 2.04 – 2.00 (m, 3H), 1.89 – 1.84 (m, 6H), 1.68 – 1.60 (m, 6H), 1.21 (t, *J* = 7.5 Hz, 3H).

**<sup>13</sup>C-NMR** (101 MHz,  $CDCl_3$ ,  $\delta$ ): 150.0, 139.4, 129.6, 129.1, 128.8, 125.5, 49.1, 43.9, 36.3, 30.2, 27.9, 15.9.

**HR-MS** (APCI): *m/z* calc for  $[M+H]^+$  273.16715, found 273.16684.

**IR** (ATR,  $\tilde{\nu}$  [ $cm^{-1}$ ]): 2965 (w), 2898 (s), 2846 (m), 1445 (m), 1373 (w), 1340 (m), 1295 (m), 1254 (w), 1184 (w), 1131 (w), 1101 (w), 1031 (s), 971 (w), 889 (w), 822 (w), 785 (w), 747 (s), 681 (m).

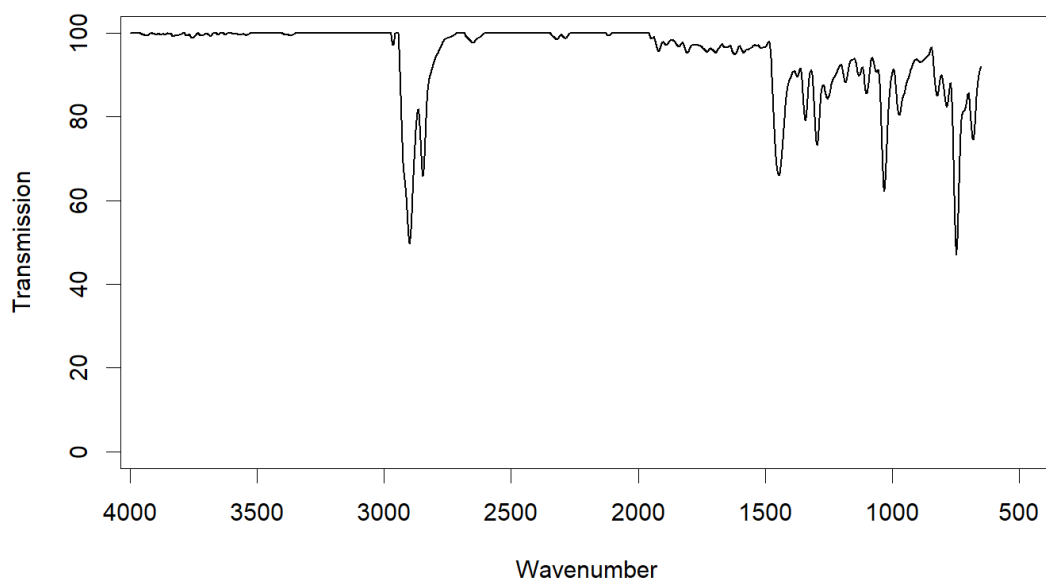

**Figure S88.** IR-spectrum (ATR, neat) of **3bb**.

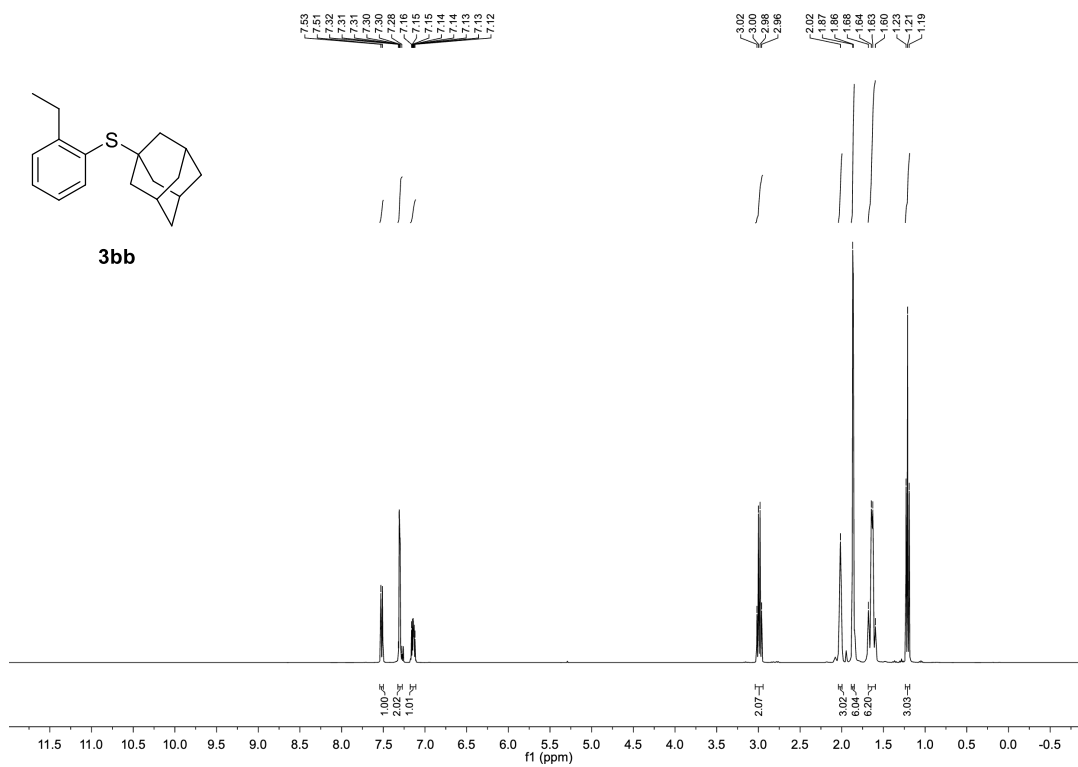

**Figure S89.**  $^1\text{H-NMR}$ -spectrum (400 MHz,  $\text{CDCl}_3$ ) of **3bb**.

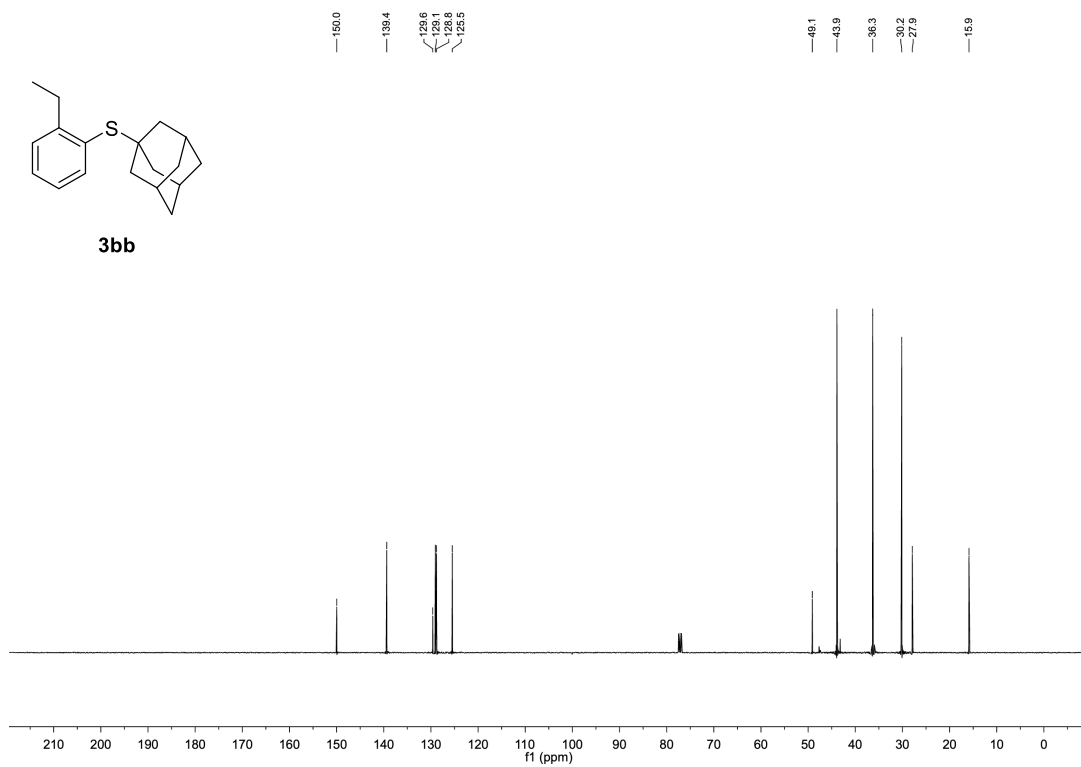

Figure S90. <sup>13</sup>C-NMR-spectrum (101 MHz, CDCl<sub>3</sub>) of **3bb**.

**((1*s*,3*s*)-Adamantan-1-yl)(2-isopropylphenyl)sulfane (**3cb**):**

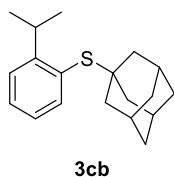

$C_{19}H_{26}S$  (286.48 g/mol)

Following **GP-B**, **3cb** was synthesized using 2-isopropylphenyl trifluoromethanesulfonate (**1c**) (268 mg, 1.00 mmol, 1.0 equiv.) and 1-adamantane thiol (**2b**) (177 mg, 1.05 mmol, 1.05 equiv.). Purification by flash chromatography ( $SiO_2$ , gradient *n*-hexane/EtOAc 100:0 to 95:5 over 10 CV) afforded **3cb** (268 mg, 918  $\mu$ mol, 92%) as colorless solid.

**R<sub>f</sub>**: 0.48 (*n*-hexane/EtOAc 95:5).

**m. p.**: 74.9 – 76.4 °C.

**<sup>1</sup>H-NMR** (400 MHz,  $CDCl_3$ ,  $\delta$ ): 7.53 – 7.49 (m, 1H), 7.36 – 7.31 (m, 2H), 7.15 – 7.08 (m, 1H), 3.94 (d, *J* = 6.9 Hz, 1H), 2.04 – 1.99 (m, 3H), 1.86 – 1.83 (m, 6H), 1.68 – 1.59 (m, 6H), 1.20 (d, *J* = 6.9 Hz, 6H).

**<sup>13</sup>C-NMR** (101 MHz,  $CDCl_3$ ,  $\delta$ ): 154.4, 139.4, 129.3, 129.0, 125.9, 125.2, 48.9, 43.9, 36.4, 30.7, 30.2, 24.1.

**HR-MS** (APCI): *m/z* calc for  $[M+H]^+$  287.18280, found 287.18233.

**IR** (ATR,  $\tilde{\nu}$  [ $cm^{-1}$ ]): 2958 (w), 2898 (s), 2846 (m), 1444 (m), 1381 (w), 1344 (w), 1295 (m), 1254 (w), 1202 (w), 1150 (w), 1101 (w), 1031 (s), 966 (w), 956 (w), 893 (w), 822 (w), 755 (s), 681 (m).

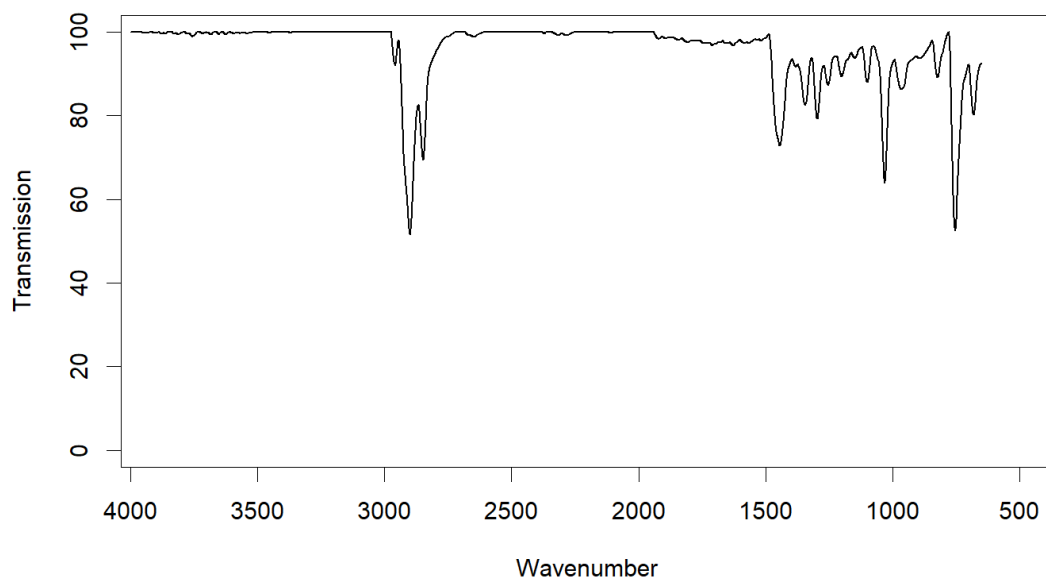

Figure S91. IR-spectrum (ATR, neat) of **3cb**.

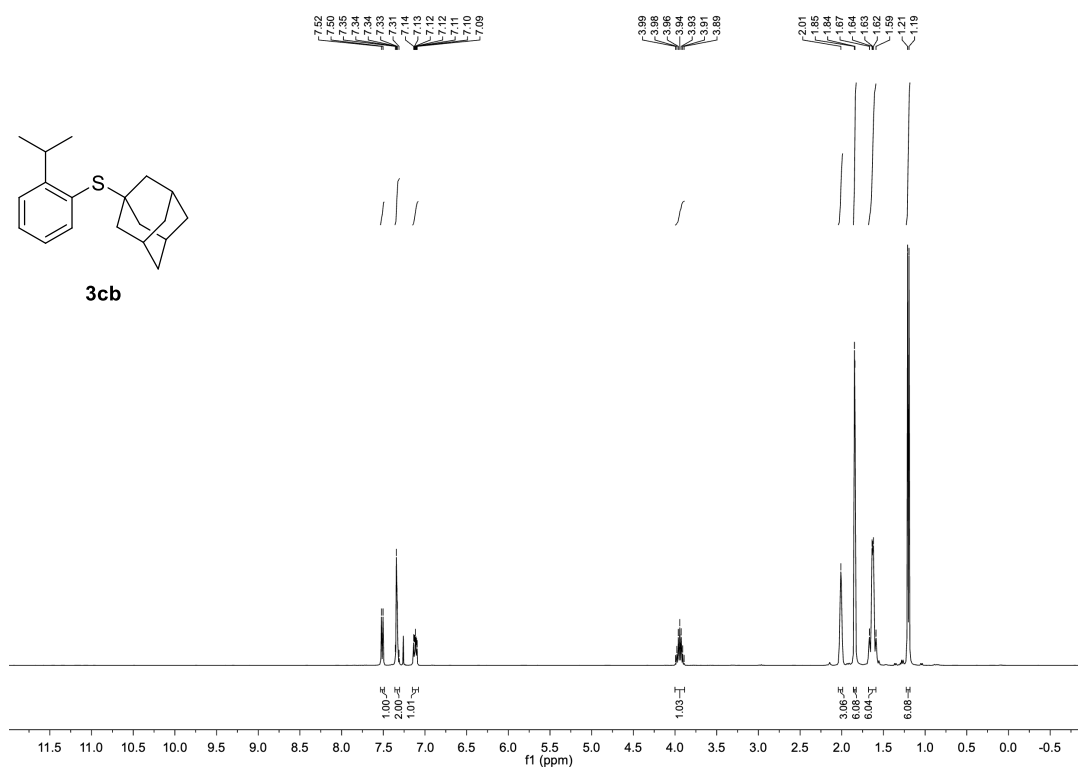

Figure S92.  $^1\text{H-NMR}$ -spectrum (400 MHz,  $\text{CDCl}_3$ ) of **3cb**.



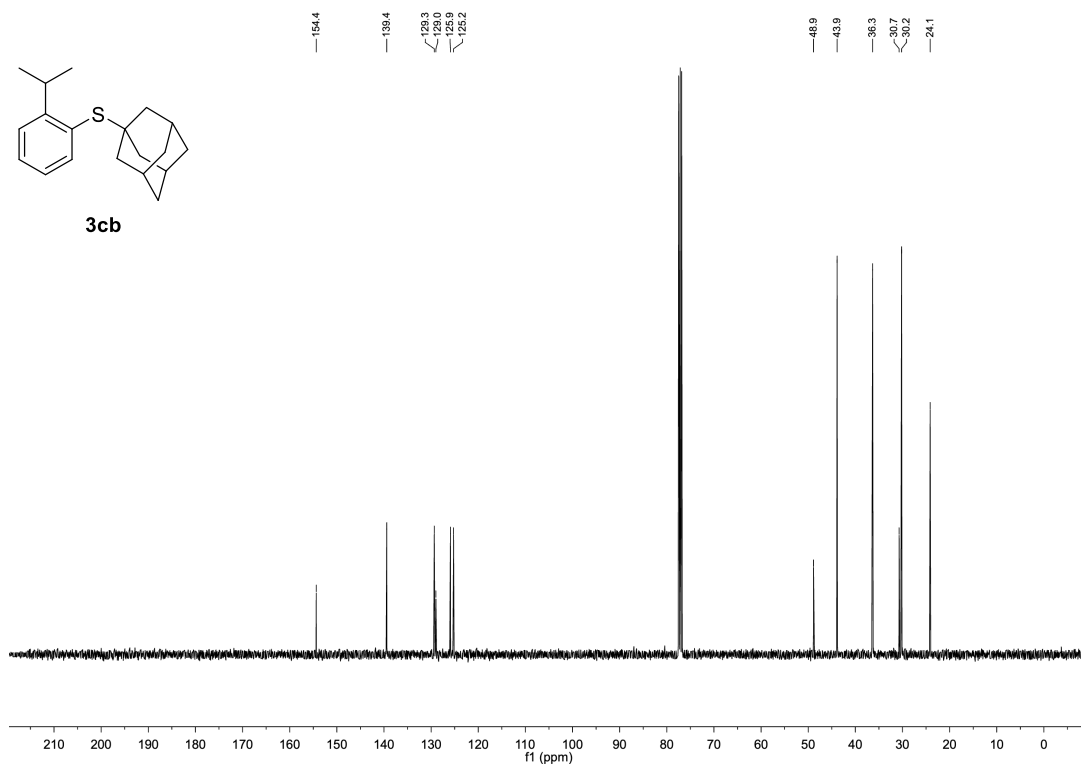

Figure S93. <sup>13</sup>C-NMR-spectrum (101 MHz, CDCl<sub>3</sub>) of **3cb**.

**((1*s*,3*s*)-Adamantan-1-yl)(2-allylphenyl)sulfane (**3eb**):**

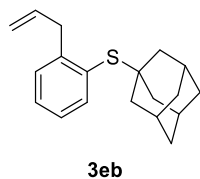

C<sub>19</sub>H<sub>24</sub>S (284.46 g/mol)

Following **GP-B**, **3eb** was synthesized using 2-allylphenyl trifluoromethanesulfonate (**1e**) (266 mg, 1.00 mmol, 1.0 equiv.) and 1-adamantane thiol (**2b**) (177 mg, 1.05 mmol, 1.05 equiv.). Purification by flash chromatography (SiO<sub>2</sub>, gradient *n*-hexane/EtOAc 100:0 to 90:10 over 10 CV) afforded **3eb** (246 mg, 865 μmol, 87%) as yellow oil.

**R<sub>f</sub>**: 0.93 (*n*-hexane/EtOAc 90:10).

**<sup>1</sup>H-NMR** (400 MHz, CDCl<sub>3</sub>, δ): 7.55 – 7.51 (m, 1H), 7.32 – 7.28 (m, 2H), 7.19 – 7.13 (m, 1H), 6.03 – 5.88 (m, 1H), 5.12 – 4.96 (m, 2H), 3.76 (d, *J* = 6.6 Hz, 2H), 2.04 – 1.99 (m, 3H), 1.86 – 1.83 (m, 6H), 1.67 – 1.58 (m, 6H).

**<sup>13</sup>C-NMR** (101 MHz, CDCl<sub>3</sub>, δ): 145.8, 139.4, 137.8, 130.1, 129.8, 129.1, 126.0, 115.9, 49.4, 43.9, 39.0, 36.3, 30.2.

**HR-MS** (APCI): *m/z* calc for [M+H]<sup>+</sup> 285.16715, found 285.16748.

**IR** (ATR,  $\tilde{\nu}$  [cm<sup>-1</sup>]): 3055 (w), 2901 (s), 2846 (m), 1634 (w), 1445 (m), 1343 (w), 1295 (m), 1254 (w), 1205 (w), 1186 (w), 1101 (w), 1034 (s), 986 (m), 908 (s), 819 (w), 751 (s), 684 (m).

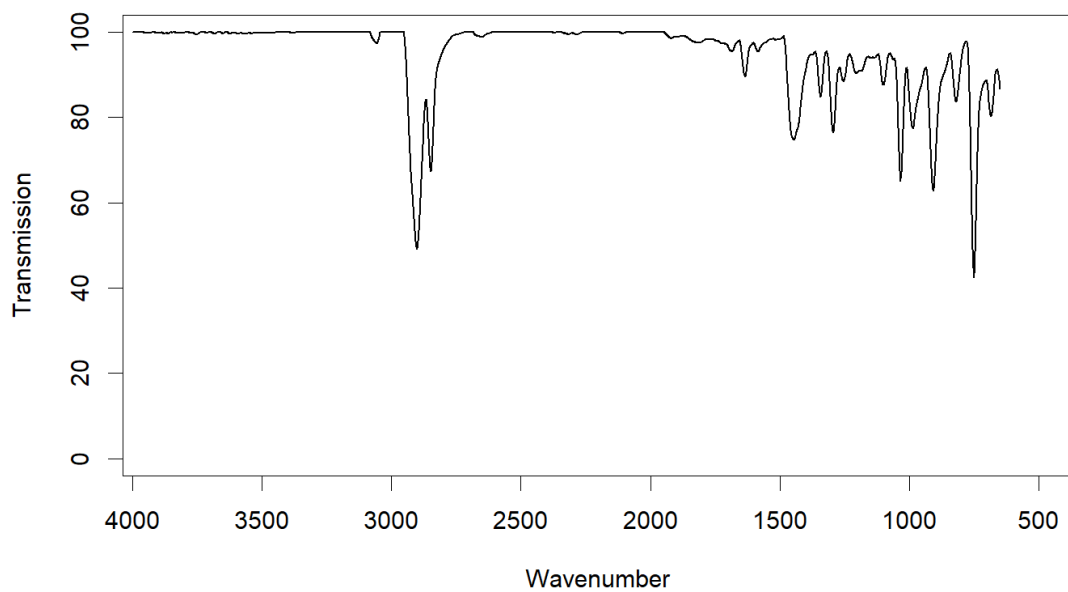

Figure S94. IR-spectrum (ATR, neat) of **3eb**.

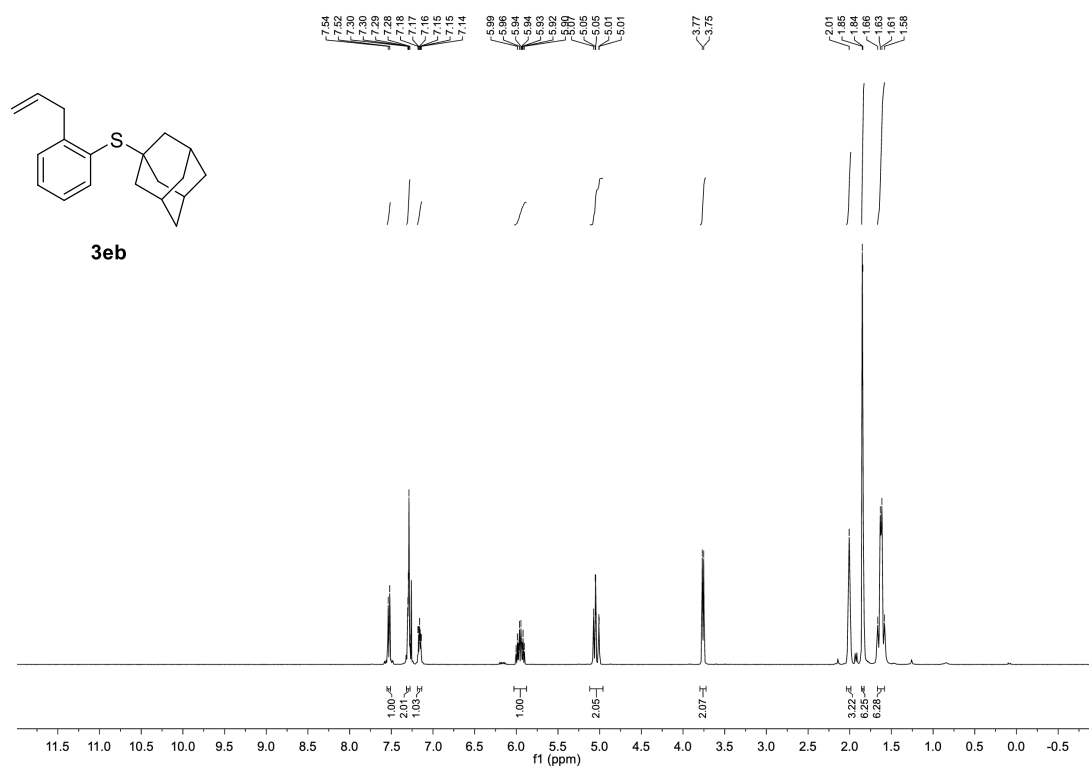

Figure S95.  $^1\text{H-NMR}$ -spectrum (400 MHz,  $\text{CDCl}_3$ ) of **3eb**.

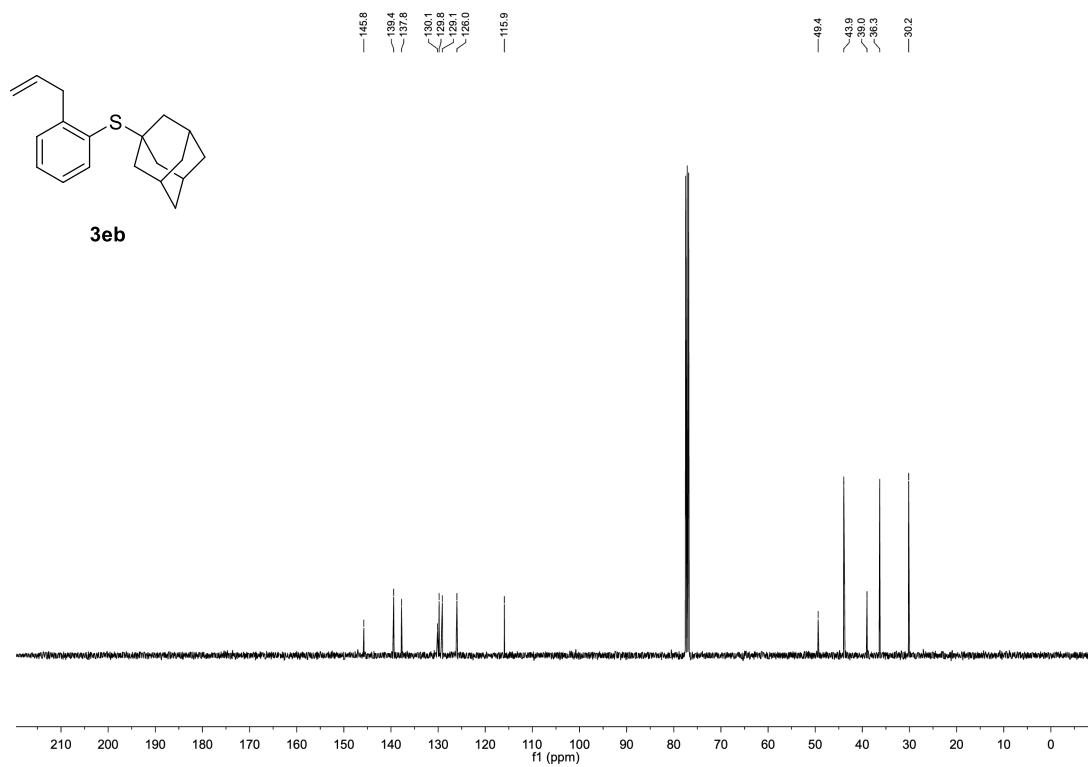

Figure S96.  $^{13}\text{C}$ -NMR-spectrum (101 MHz,  $\text{CDCl}_3$ ) of **3eb**.

**1-(3,5-Dimethyl-4-(tetradecylthio)phenyl)ethan-1-one (3fc):**

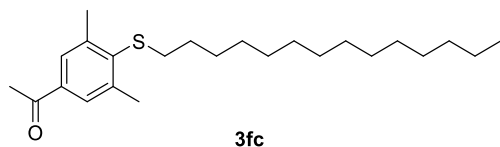

C<sub>24</sub>H<sub>40</sub>OS (376.64 g/mol)

Following **GP-C**, **3fc** was synthesized using 4-acetyl-2,6-dimethylphenyl trifluoromethanesulfonate (**1f**) (296 mg, 1.00 mmol, 1.0 equiv.) and *n*-tetradecane thiol (**2c**) (242 mg, 1.05 mmol, 1.05 equiv.). The reaction temperature was set to 100 °C and the reaction time was prolonged to 16 h. Purification by flash chromatography (SiO<sub>2</sub>, gradient *n*-hexane/EtOAc 100:0 to 90:10 over 10 CV, then to 60:40 over 5 CV) afforded **3fc** (153 mg, 406 μmol, 41%) as colorless solid.

**R<sub>f</sub>**: 0.24 (*n*-hexane/EtOAc 95:5).

**m. p.**: 48.7 – 50.6 °C.

**<sup>1</sup>H-NMR** (400 MHz, CDCl<sub>3</sub>, δ): 7.65 (s, 2H), 2.67 (t, *J* = 7.4 Hz, 2H), 2.58 (s, 6H), 2.57 (s, 3H), 1.57 – 1.47 (m, 2H), 1.41 – 1.21 (m, 23H), 0.88 (t, *J* = 6.8 Hz, 3H).

**<sup>13</sup>C-NMR** (101 MHz, CDCl<sub>3</sub>, δ): 198.4, 143.4, 140.6, 136.2, 127.6, 35.5, 32.1, 30.1, 29.83, 29.80, 29.77, 29.71, 29.65, 29.5, 29.3, 29.0, 26.8, 22.8, 22.4, 14.3.

**HR-MS** (ESI): *m/z* calc for [M+Na]<sup>+</sup> 399.26921, found 399.26934.

**IR** (ATR,  $\tilde{\nu}$  [cm<sup>-1</sup>]): 2950 (w), 2913 (m), 2846 (m), 1679 (m), 1586 (w), 1556 (w), 1459 (m), 1412 (w), 1377 (w), 1351 (w), 1299 (m), 1206 (m), 1120 (w), 1079 (w), 1042 (w), 1023 (w), 978 (w), 929 (w), 866 (w), 784 (w), 721 (m).

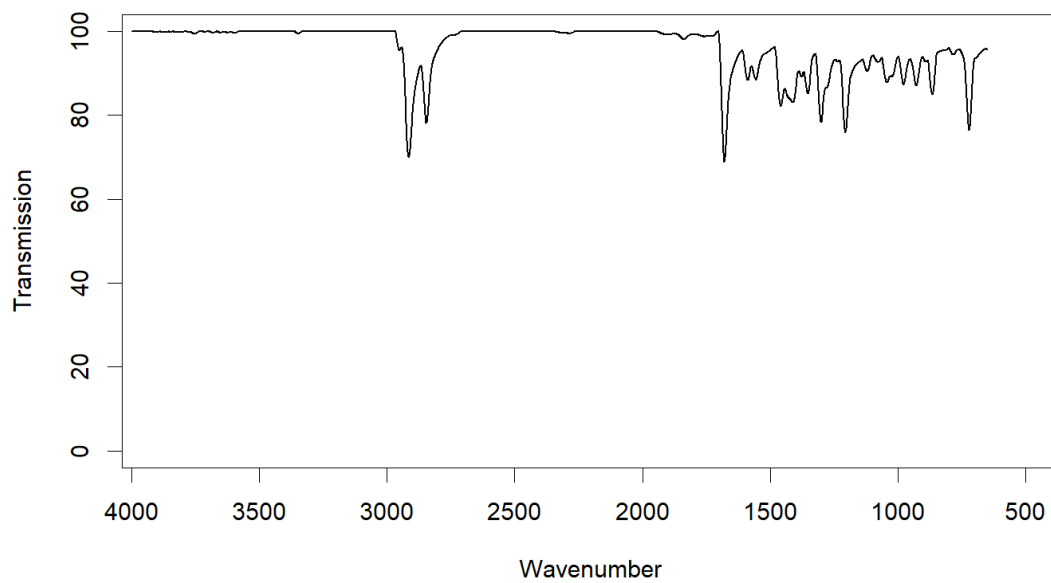

Figure S97. IR-spectrum (ATR, neat) of **3fc**.

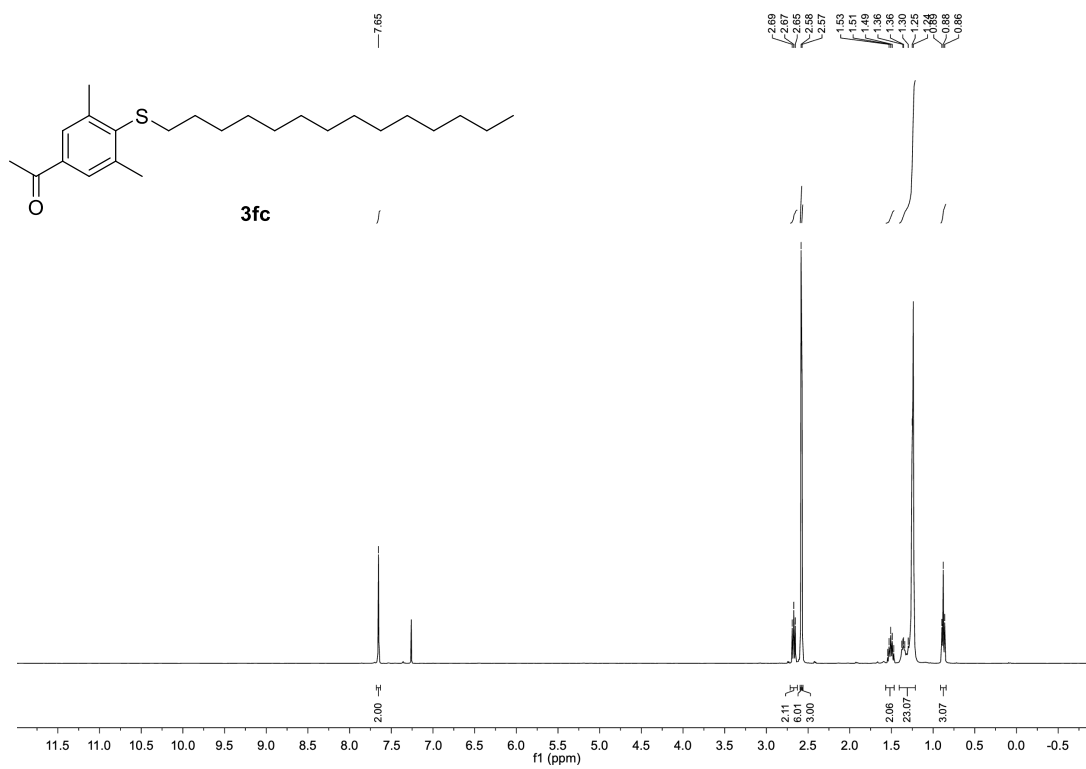

Figure S98.  $^1\text{H-NMR}$ -spectrum (400 MHz,  $\text{CDCl}_3$ ) of **3fc**.

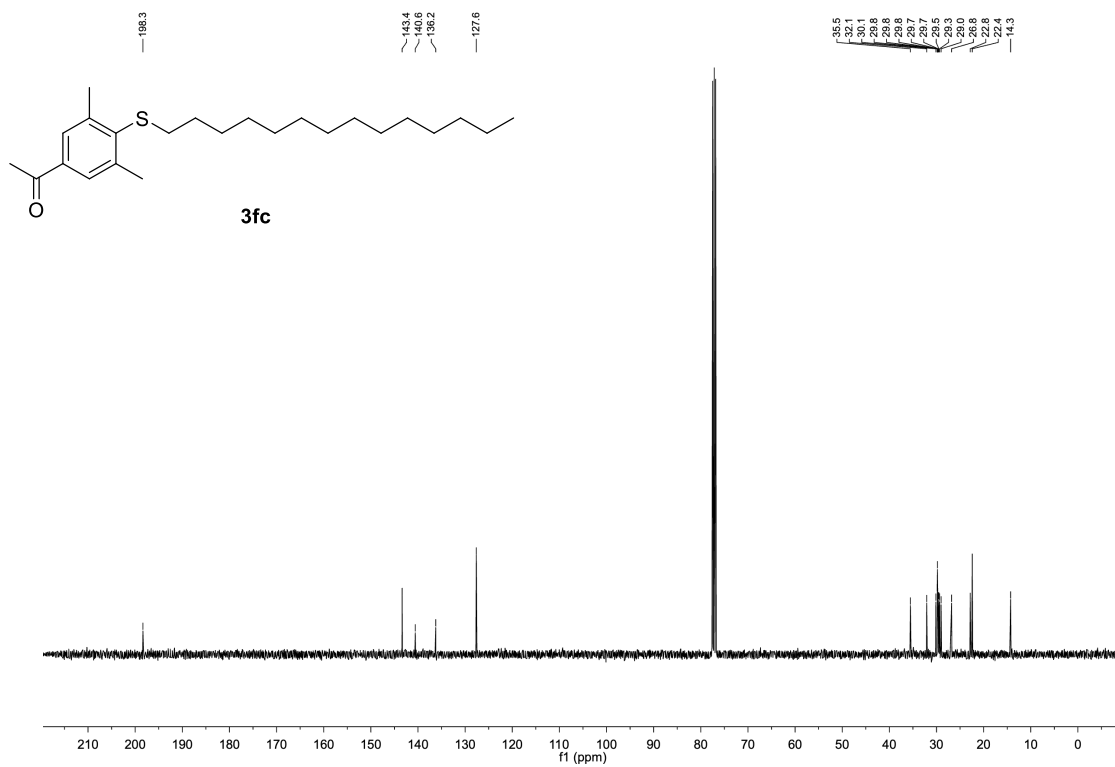

Figure S99.  $^{13}\text{C}$ -NMR-spectrum (101 MHz,  $\text{CDCl}_3$ ) of **3fc**.

**1,2-Bis(((1*s*,3*S*)-adamantan-1-yl)thio)benzene (**3gb**):**

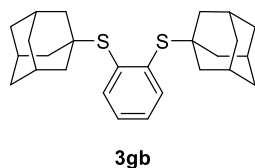

C<sub>26</sub>H<sub>34</sub>S<sub>2</sub> (410.68 g/mol)

Following **GP-B**, **3gb** was synthesized using 1,2-phenylene bis(trifluoromethanesulfonate) (**1g**) (374 mg, 1.00 mmol, 1.0 equiv.), 1-adamantane thiol (**2b**) (353 mg, 2.10 mmol, 2.10 equiv.), potassium acetate (216 mg, 2.20 mmol, 2.2 equiv.), Ni(cod)<sub>2</sub> (27.5 mg, 100 μmol, 10 mol%) and **L2** (44.7 mg, 100 μmol, 10 mol%). Purification by flash chromatography (SiO<sub>2</sub>, gradient *n*-hexane/EtOAc 100:0 to 95:5 over 10 CV) afforded **3gb** (363 mg, 885 μmol, 89%) as colorless solid.

**R<sub>f</sub>**: 0.10 (*n*-hexane).

**m. p.**: 106.5 – 111.1 °C.

**<sup>1</sup>H-NMR** (400 MHz, CDCl<sub>3</sub>, δ): 7.73 – 7.63 (m, 2H), 7.29 – 7.24 (m, 2H), 2.04 – 1.97 (m, 6H), 1.91 – 1.81 (m, 12H), 1.68 – 1.58 (m, 12H).

**<sup>13</sup>C-NMR** (101 MHz, CDCl<sub>3</sub>, δ): 139.0, 138.6, 128.0, 50.1, 43.9, 36.4, 30.2.

**HR-MS** (APCI): *m/z* calc for [M+H]<sup>+</sup> 411.21747, found 411.21794.

**IR** (ATR,  $\tilde{\nu}$  [cm<sup>-1</sup>]): 2894 (s), 2846 (m), 1567 (w), 1441 (m), 1340 (m), 1292 (m), 1250 (w), 1209 (w), 1142 (w), 1101 (w), 1030 (m), 971 (w), 885 (w), 817 (w), 747 (s), 684 (m).



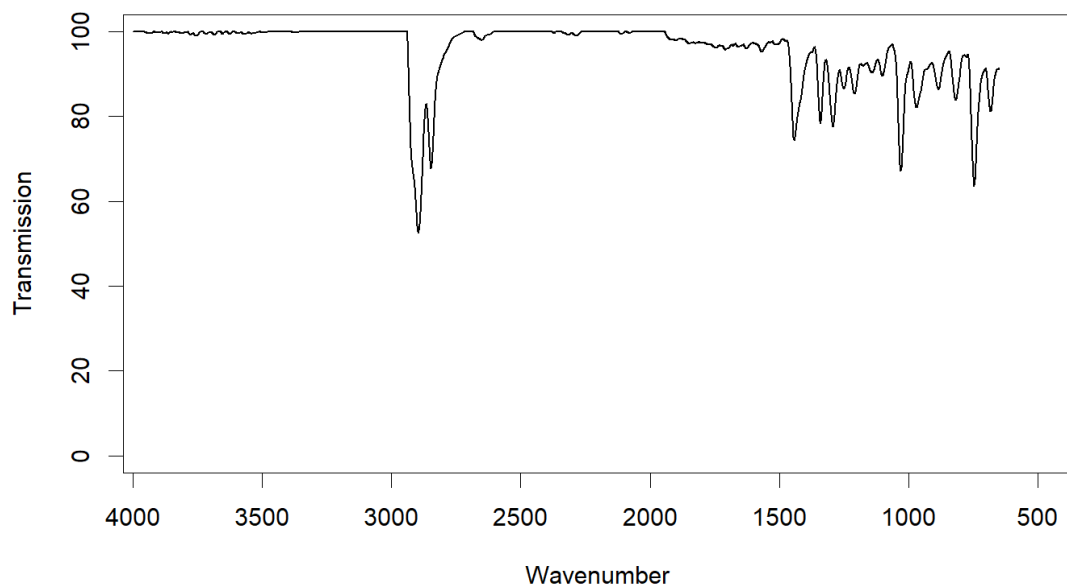

**Figure S100.** IR-spectrum (ATR, neat) of **3gb**.

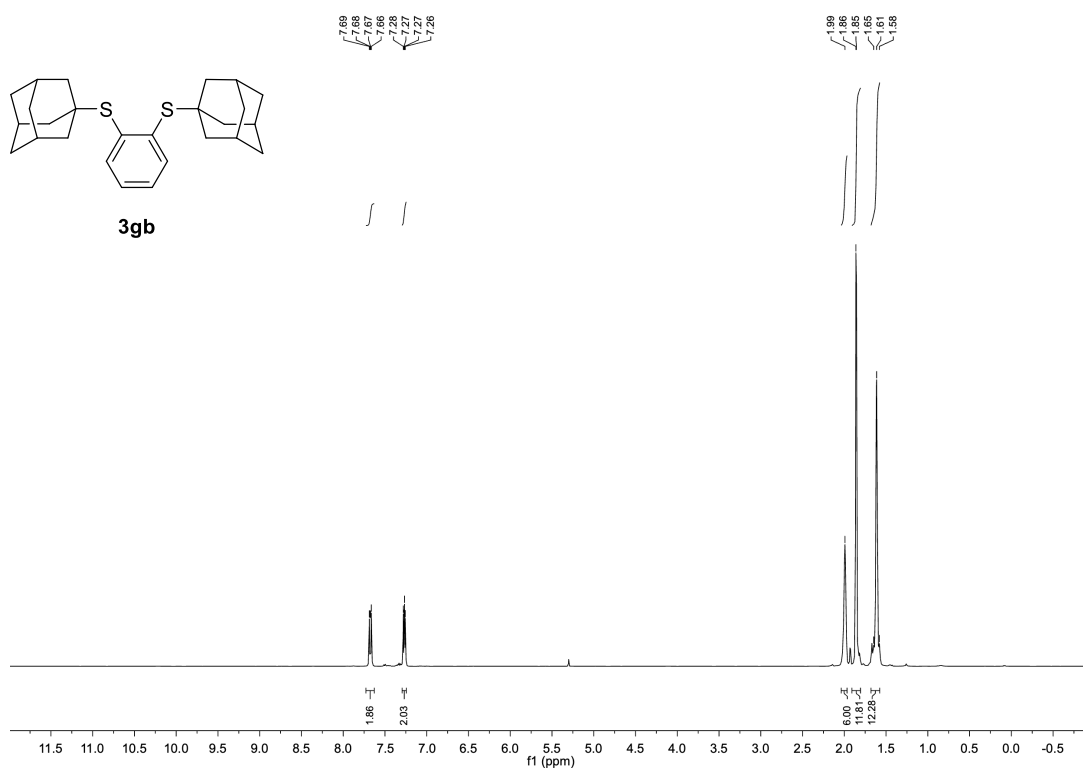

**Figure S101.**  $^1\text{H-NMR}$ -spectrum (400 MHz,  $\text{CDCl}_3$ ) of **3gb**.

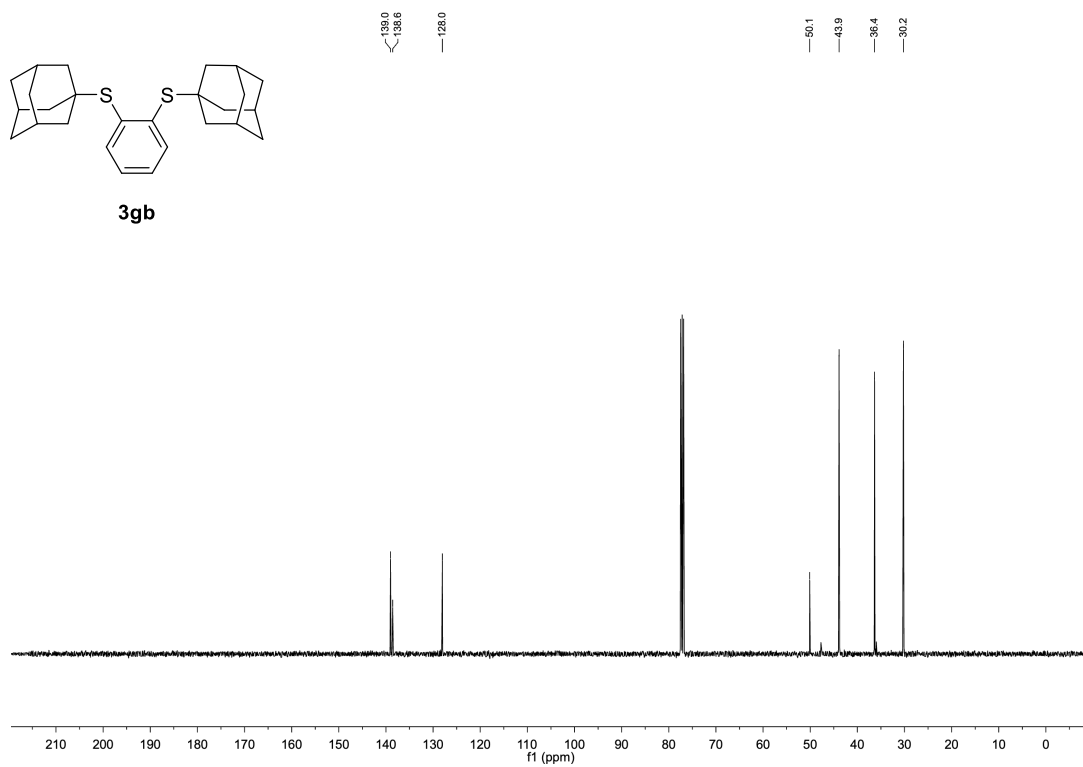

**Figure S102.**  $^{13}\text{C}$ -NMR-spectrum (101 MHz,  $\text{CDCl}_3$ ) of **3gb**.

**((1*s*,3*s*)-Adamantan-1-yl)(2-(trifluoromethyl)phenyl)sulfane (**3hb**):**

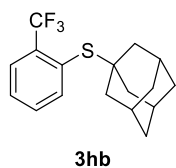

C<sub>17</sub>H<sub>19</sub>F<sub>3</sub>S (312.39 g/mol)

Following **GP-A**, **3hb** was synthesized using 2-(trifluoromethyl)phenyl trifluoromethanesulfonate (**1h**) (294 mg, 1.00 mmol, 1.0 equiv.) and 1-adamantane thiol (**2b**) (177 mg, 1.05 mmol, 1.05 equiv.). Purification by flash chromatography (SiO<sub>2</sub>, gradient *n*-hexane/EtOAc 100:0 to 95:5 over 10 CV) afforded **3hb** (220 mg, 657 μmol, 66%) as colorless oil.

**R<sub>f</sub>**: 0.47 (*n*-hexane).

**<sup>1</sup>H-NMR** (400 MHz, CDCl<sub>3</sub>, δ): 7.76 – 7.65 (m, 2H), 7.52 – 7.38 (m, 2H), 2.06 – 2.00 (m, 3H), 1.90 – 1.86 (m, 6H), 1.68 – 1.59 (m, 6H).

**<sup>13</sup>C-NMR** (101 MHz, CDCl<sub>3</sub>, δ): 140.2, 134.8 (q, *J* = 28.7 Hz), 130.9, 128.3, 126.9 (q, *J* = 5.9 Hz), 123.6 (q, *J* = 274.0 Hz), 50.3, 44.0, 36.1, 30.2.

**Note:** We were unable to observe the expected signal of the C(Ar)–S carbon.

**<sup>19</sup>F-NMR** (376 MHz, CDCl<sub>3</sub>, δ): -57.9.

**HR-MS** (ESI): *m/z* calc for [M+Na]<sup>+</sup> 335.10518, found 335.10579.

**IR** (ATR,  $\tilde{\nu}$  [cm<sup>-1</sup>]): 2902 (s), 2850 (m), 1590 (w), 1441 (m), 1344 (w), 1303 (vs), 1255 (m), 1164 (s), 1135 (vs), 1103 (vs), 1030 (vs), 966 (w), 881 (w), 818 (w), 766 (s), 740 (m), 706 (w), 680 (w).

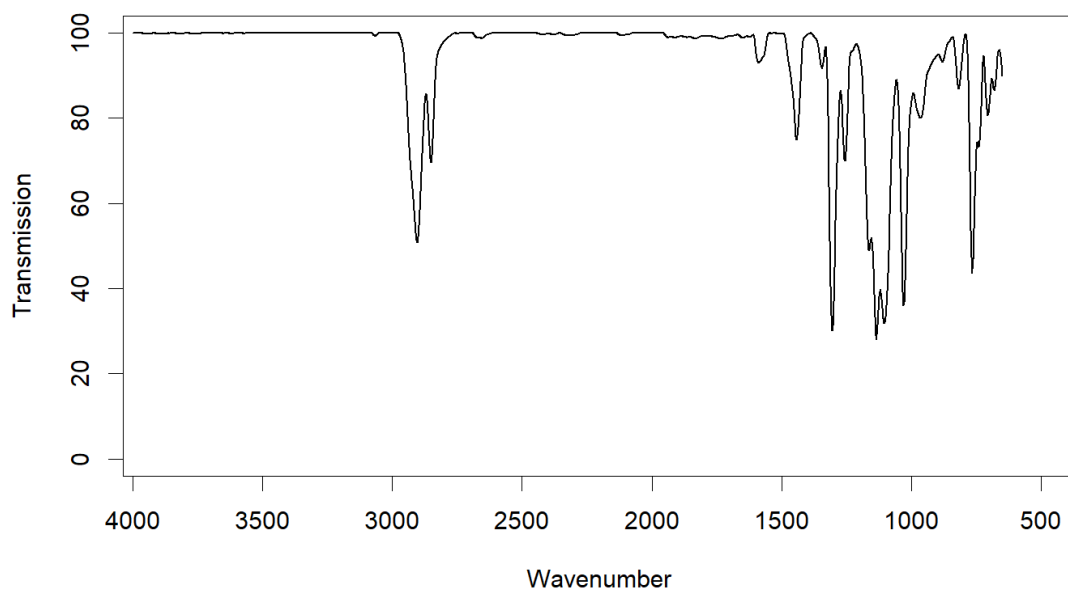

**Figure S103.** IR-spectrum (ATR, neat) of **3hb**.

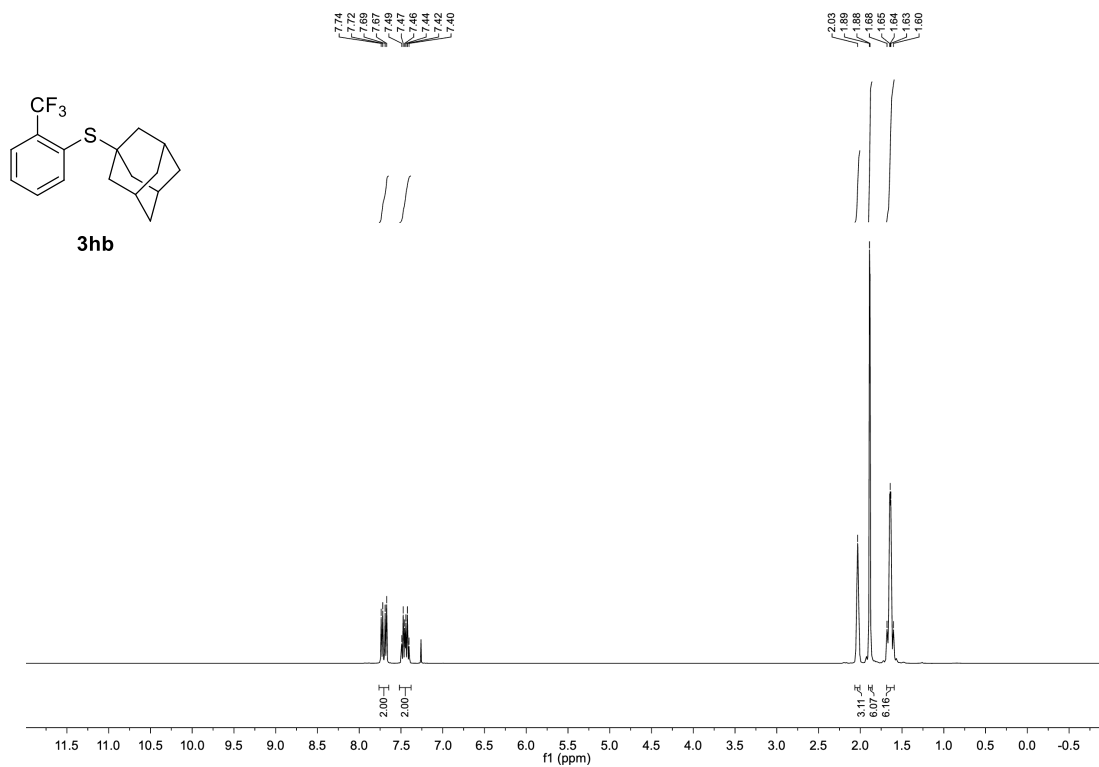

**Figure S104.** <sup>1</sup>H-NMR-spectrum (400 MHz, CDCl<sub>3</sub>) of **3hb**.

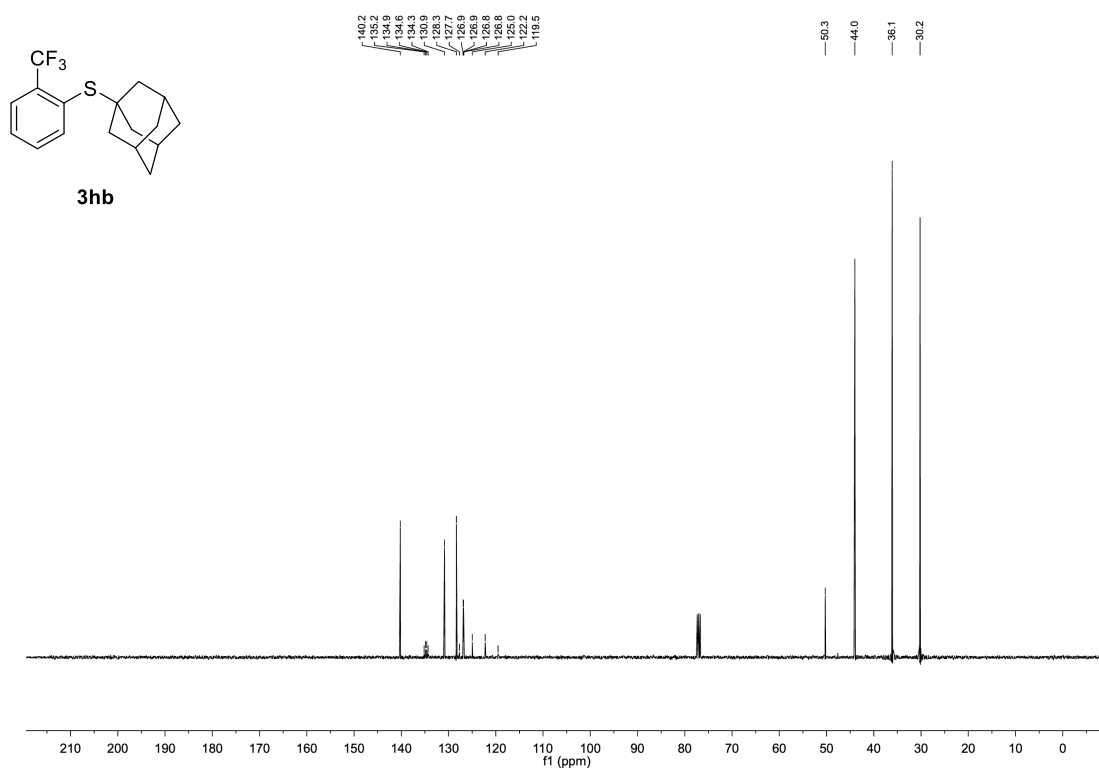

**Figure S105.** <sup>13</sup>C-NMR-spectrum (101 MHz, CDCl<sub>3</sub>) of **3hb**.

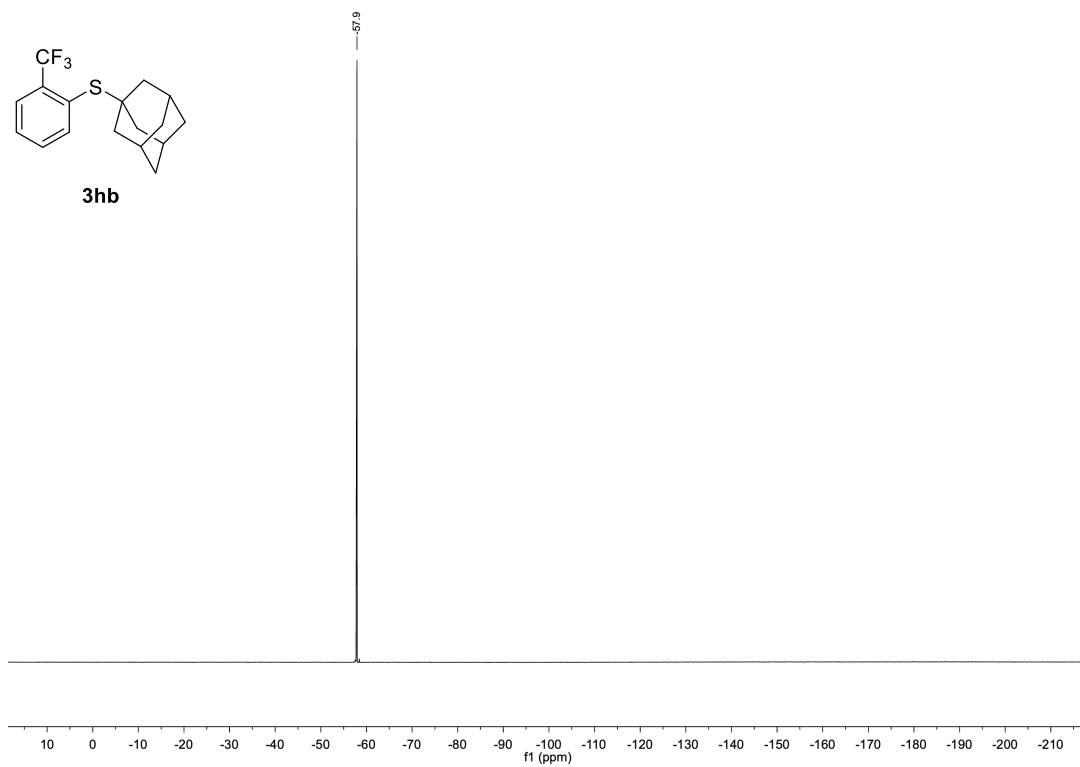

**Figure S106.**  $^{19}\text{F}$ -NMR-spectrum (376 MHz,  $\text{CDCl}_3$ ) of **3hb**.

**2-(((1s,3s)-Adamantan-1-yl)thio)benzotrile (3ib):**

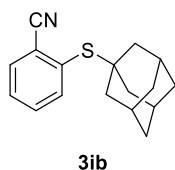

C<sub>17</sub>H<sub>19</sub>NS (269.41 g/mol)

Following **GP-B**, **3ib** was synthesized using 2-cyanophenyl trifluoromethanesulfonate (**1i**) (251 mg, 1.00 mmol, 1.0 equiv.) and 1-adamantane thiol (**2b**) (177 mg, 1.05 mmol, 1.05 equiv.). The reaction time was shortened to 2 h. Purification by flash chromatography (SiO<sub>2</sub>, gradient *n*-hexane/EtOAc 100:0 to 90:10 over 10 CV) afforded **3ib** (244 mg, 906 μmol, 91%) as colorless solid.

**R<sub>f</sub>**: 0.43(*n*-hexane/EtOAc 95:5).

**m. p.**: 76.6 – 78.3 °C.

**<sup>1</sup>H-NMR** (400 MHz, CDCl<sub>3</sub>, δ): 7.81 – 7.60 (m, 2H), 7.57 – 7.39 (m, 2H), 2.09 – 1.98 (m, 3H), 1.95 – 1.83 (m, 6H), 1.70 – 1.57 (m, 6H).

**<sup>13</sup>C-NMR** (101 MHz, CDCl<sub>3</sub>, δ): 139.4, 134.8, 133.7, 132.1, 129.2, 121.6, 118.5, 51.3, 43.7, 36.1, 30.2.

**HR-MS** (ESI): *m/z* calc for [M+Na]<sup>+</sup> 292.11304, found 292.11314.

**IR** (ATR,  $\tilde{\nu}$  [cm<sup>-1</sup>]): 2898 (s), 2849 (m), 2227 (w), 1724 (w), 1650 (w), 1579 (w), 1448 (m), 1344 (w), 1291 (m), 1254 (w), 1191 (w), 1124 (w), 1101 (w), 1064 (w), 1031 (m), 968 (w), 882 (w), 818 (w), 763 (s), 680 (m).

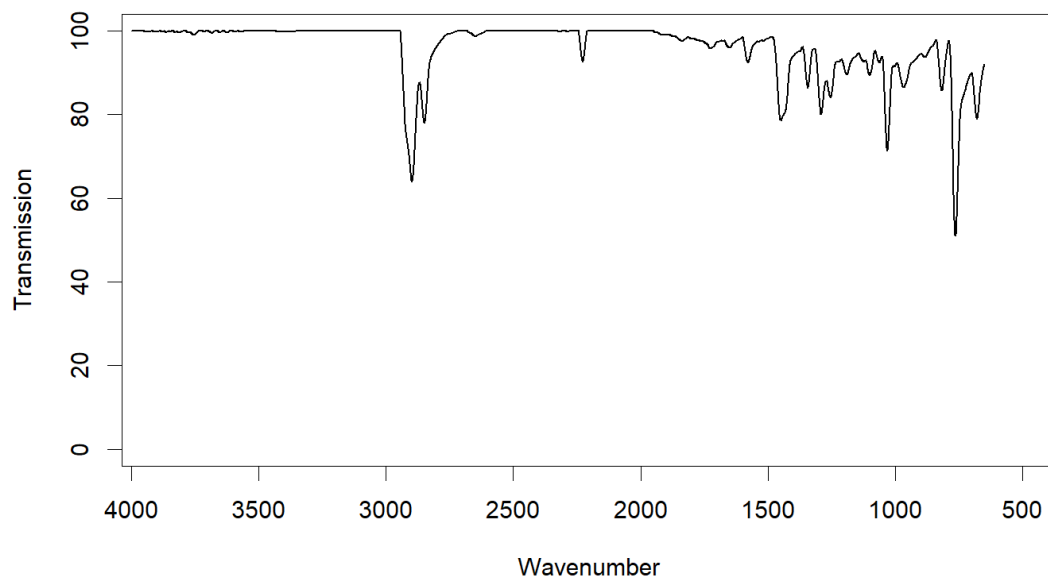

**Figure S107.** IR-spectrum (ATR, neat) of **3ib**.

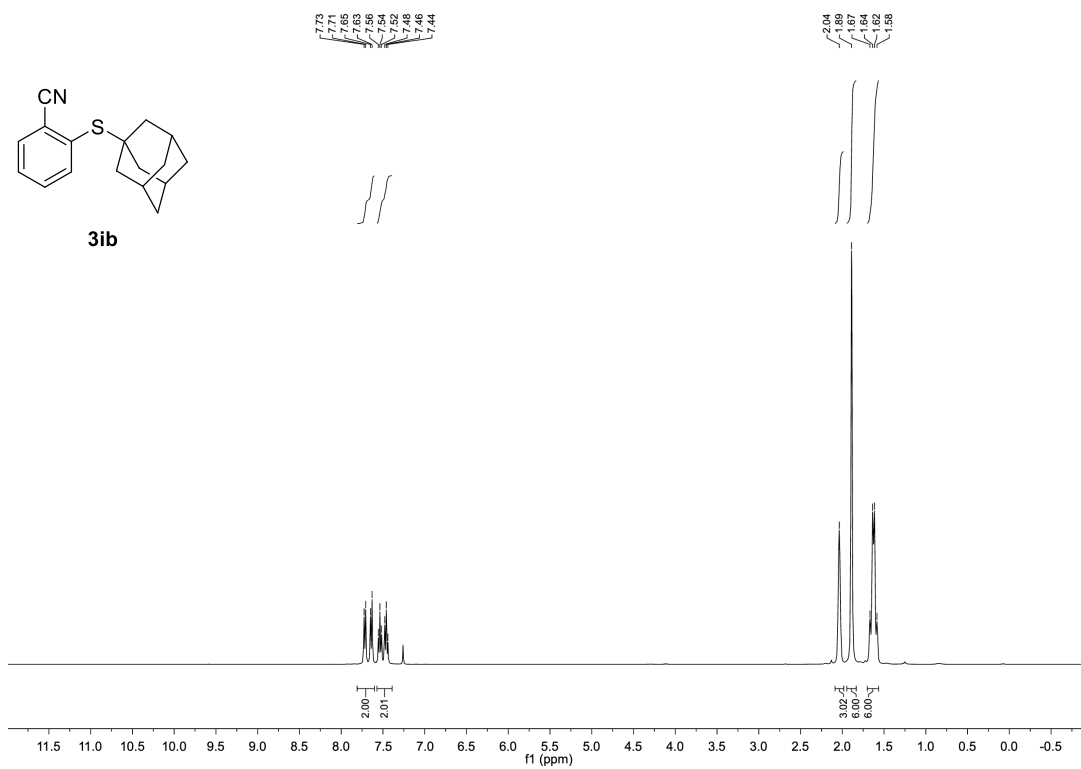

**Figure S108.**  $^1\text{H}$ -NMR-spectrum (400 MHz,  $\text{CDCl}_3$ ) of **3ib**.



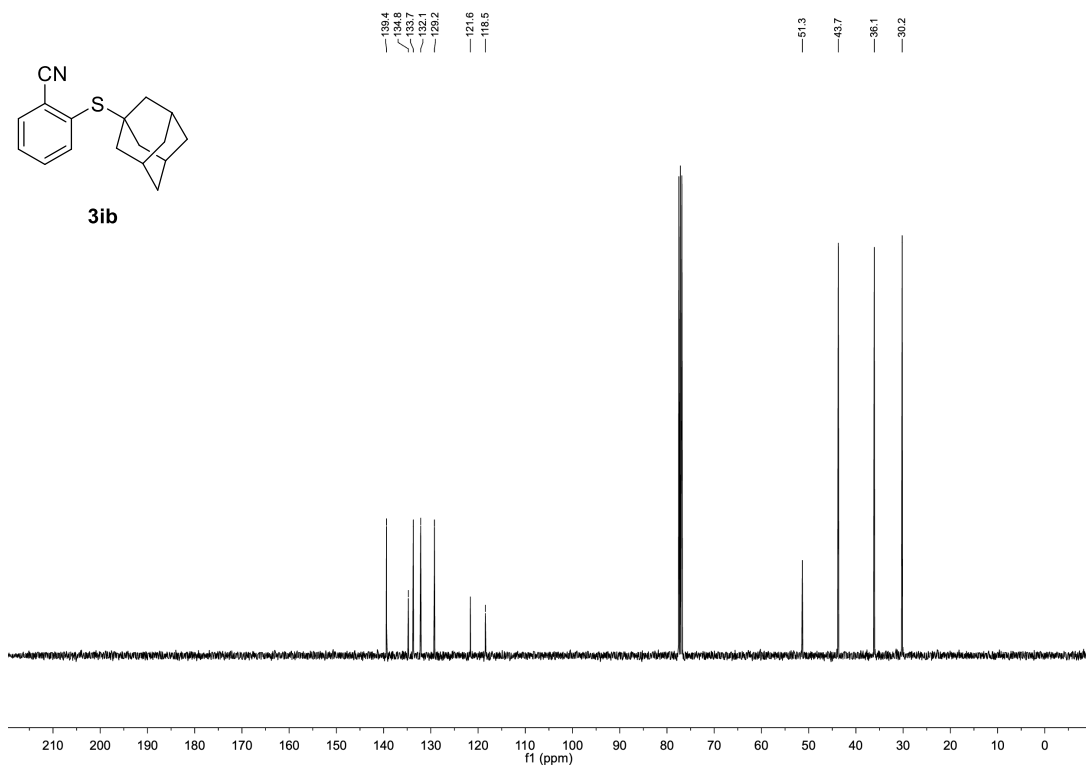

Figure S109. <sup>13</sup>C-NMR-spectrum (101 MHz, CDCl<sub>3</sub>) of **3ib**.

**((1*s*,3*s*)-Adamantan-1-yl)(2-chlorophenyl)sulfane (**3jb**):**

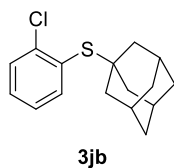

C<sub>16</sub>H<sub>19</sub>ClS (278.84 g/mol)

Following **GP-B**, **3jb** was synthesized using 2-chlorophenyl trifluoromethanesulfonate (**1j**) (261 mg, 1.00 mmol, 1.0 equiv.) and 1-adamantane thiol (**2b**) (177 mg, 1.05 mmol, 1.05 equiv.). Purification by flash chromatography (SiO<sub>2</sub>, gradient *n*-hexane/EtOAc 100:0 to 90:10 over 10 CV) afforded **3jb** (190 mg, 683 μmol, 68%) as colorless solid.

**R<sub>f</sub>**: 0.80 (*n*-hexane/EtOAc 95:5).

**m. p.**: 79.5 – 81.5 °C.

**<sup>1</sup>H-NMR** (400 MHz, CDCl<sub>3</sub>, δ): 7.63 – 7.57 (m, 1H), 7.51 – 7.45 (m, 1H), 7.32 – 7.26 (m, 1H), 7.24 – 7.18 (m, 1H), 2.04 – 2.00 (m, 3H), 1.91 – 1.87 (m, 6H), 1.67 – 1.59 (m, 6H).

**<sup>13</sup>C-NMR** (101 MHz, CDCl<sub>3</sub>, δ): 141.5, 140.5, 130.22, 130.16, 126.5, 50.7, 43.8, 36.3, 30.2.

**HR-MS** (APCI): *m/z* calc for [M]<sup>+</sup> 278.08905, found 278.08915.

**IR** (ATR,  $\tilde{\nu}$  [cm<sup>-1</sup>]): 2894 (s), 2842 (m), 1803 (w), 1694 (w), 1567 (w), 1444 (m), 1422 (m), 1340 (w), 1292 (m), 1254 (w), 1214 (w), 1180 (w), 1108 (w), 1031 (s), 971 (m), 949 (w), 885 (w), 820 (w), 743 (s), 681 (m).

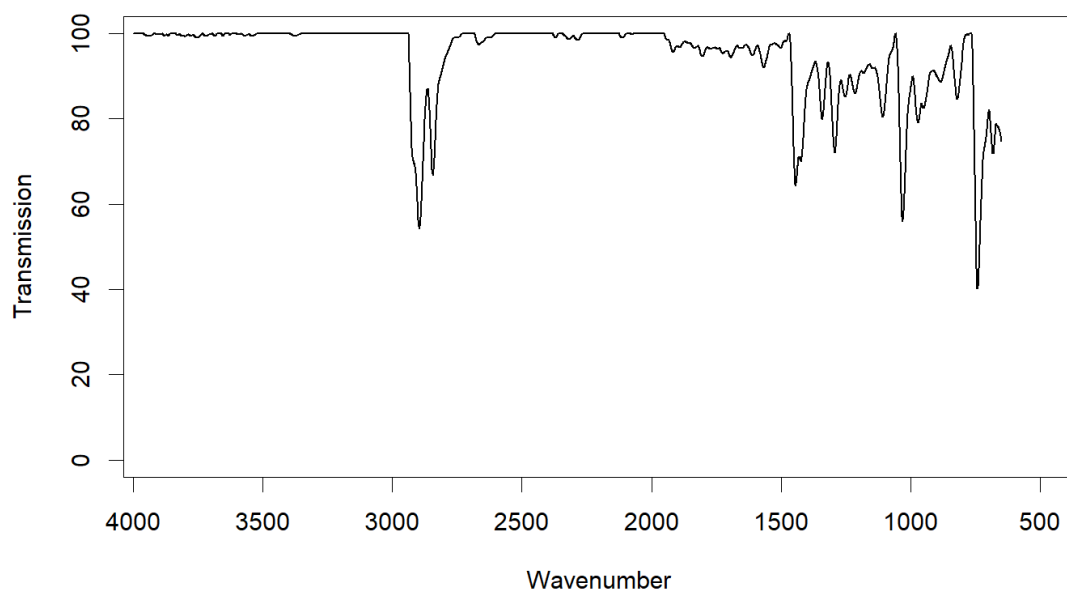

**Figure S110.** IR-spectrum (ATR, neat) of **3jb**.

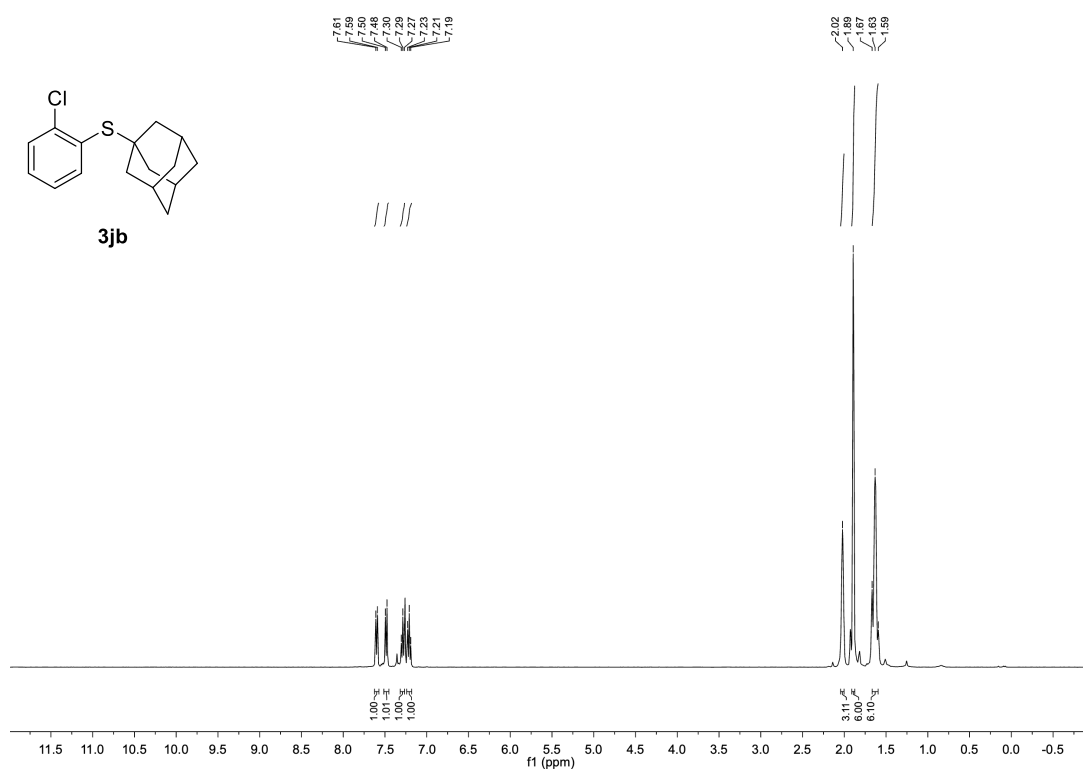

**Figure S111.**  $^1\text{H}$ -NMR-spectrum (400 MHz,  $\text{CDCl}_3$ ) of **3jb**.

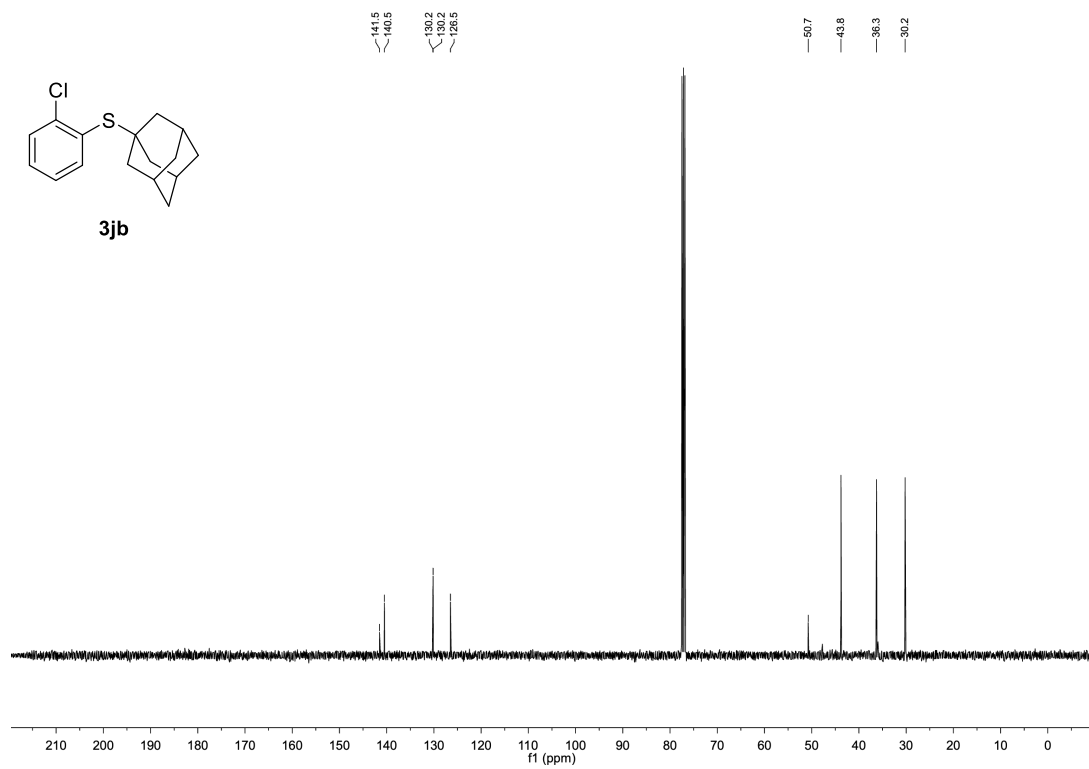

**Figure S112.**  $^{13}\text{C-NMR}$ -spectrum (101 MHz,  $\text{CDCl}_3$ ) of **3jb**.

**1-(2-(((1*s*,3*s*)-Adamantan-1-yl)thio)naphthalen-1-yl)ethan-1-one (**3kb**):**

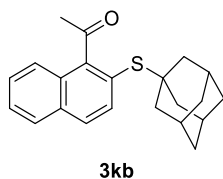

C<sub>22</sub>H<sub>24</sub>OS (336.49 g/mol)

Following **GP-C**, **3kb** was synthesized using 1-acetylnaphthalen-2-yl trifluoromethanesulfonate (**1k**) (318 mg, 1.00 mmol, 1.0 equiv.) and 1-adamantane thiol (**2b**) (177 mg, 1.05 mmol, 1.05 equiv.). Purification by flash chromatography (SiO<sub>2</sub>, gradient *n*-hexane/EtOAc 100:0 to 90:10 over 10 CV) afforded **3kb** (308 mg, 915 μmol, 92%) as colorless solid.

**R<sub>f</sub>**: 0.53 (*n*-hexane/EtOAc 90:10).

**m. p.**: 122.2 – 124.0 °C.

**<sup>1</sup>H-NMR** (400 MHz, CDCl<sub>3</sub>, δ): 7.90 – 7.84 (m, 1H), 7.82 – 7.75 (m, 1H), 7.69 – 7.63 (m, 1H), 7.59 – 7.48 (m, 3H), 2.68 (s, 3H), 2.05 – 1.97 (m, 3H), 1.91 – 1.79 (m, 6H), 1.65 – 1.56 (m, 6H).

**<sup>13</sup>C-NMR** (101 MHz, CDCl<sub>3</sub>, δ): 206.3, 147.3, 134.9, 133.3, 129.2, 128.3, 128.2, 127.4, 127.1, 124.9, 123.6, 50.6, 44.0, 36.2, 34.3, 30.3.

**HR-MS** (APCI): *m/z* calc for [M+H]<sup>+</sup> 337.16206, found 337.16259.

**IR** (ATR,  $\tilde{\nu}$  [cm<sup>-1</sup>]): 2901 (m), 2842 (w), 1701 (m), 1578 (w), 1496 (w), 1445 (w), 1414 (w), 1373 (w), 1343 (m), 1291 (w), 1258 (w), 1209 (m), 1172 (w), 1124 (w), 1105 (w), 1031 (m), 952 (m), 860 (w), 815 (m), 785 (w), 748 (m), 677 (m).

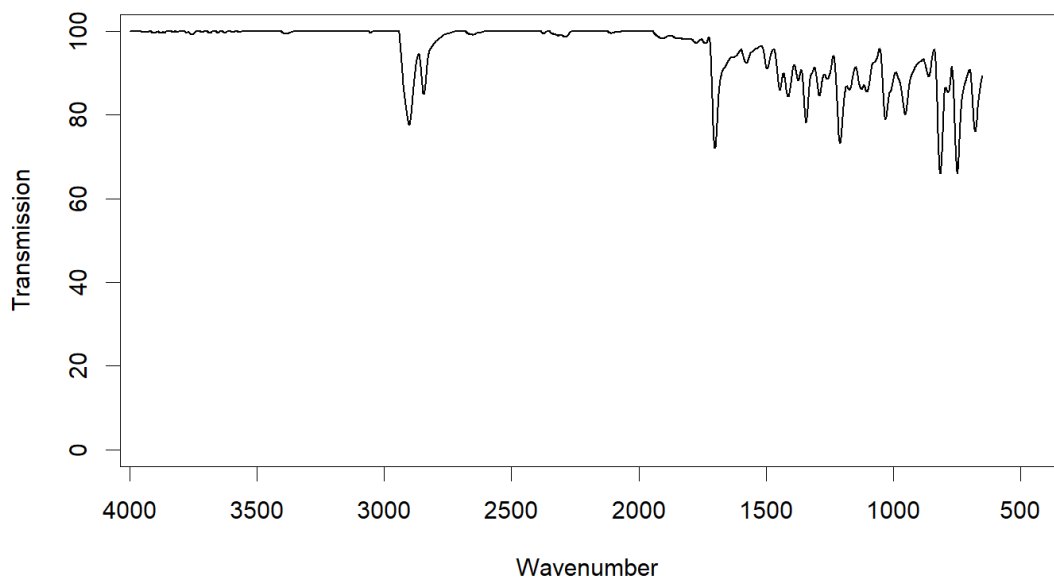

**Figure S113.** IR-spectrum (ATR, neat) of **3kb**.

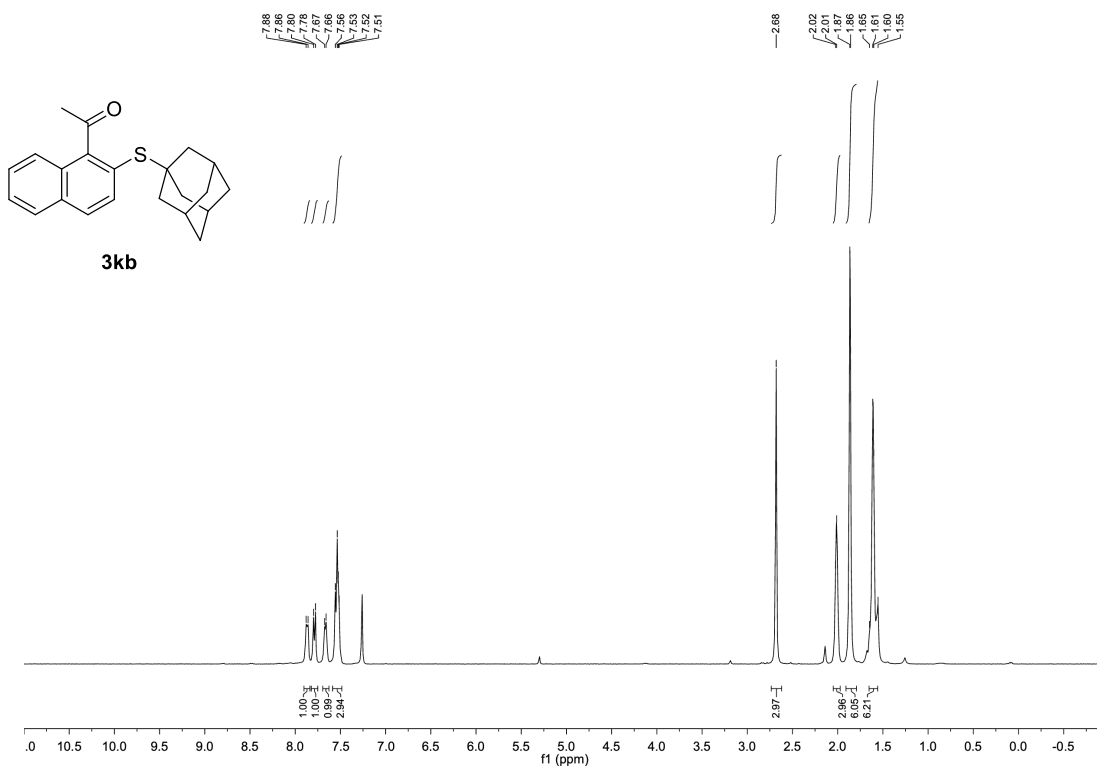

**Figure S114.**  $^1\text{H-NMR}$ -spectrum (400 MHz,  $\text{CDCl}_3$ ) of **3kb**.

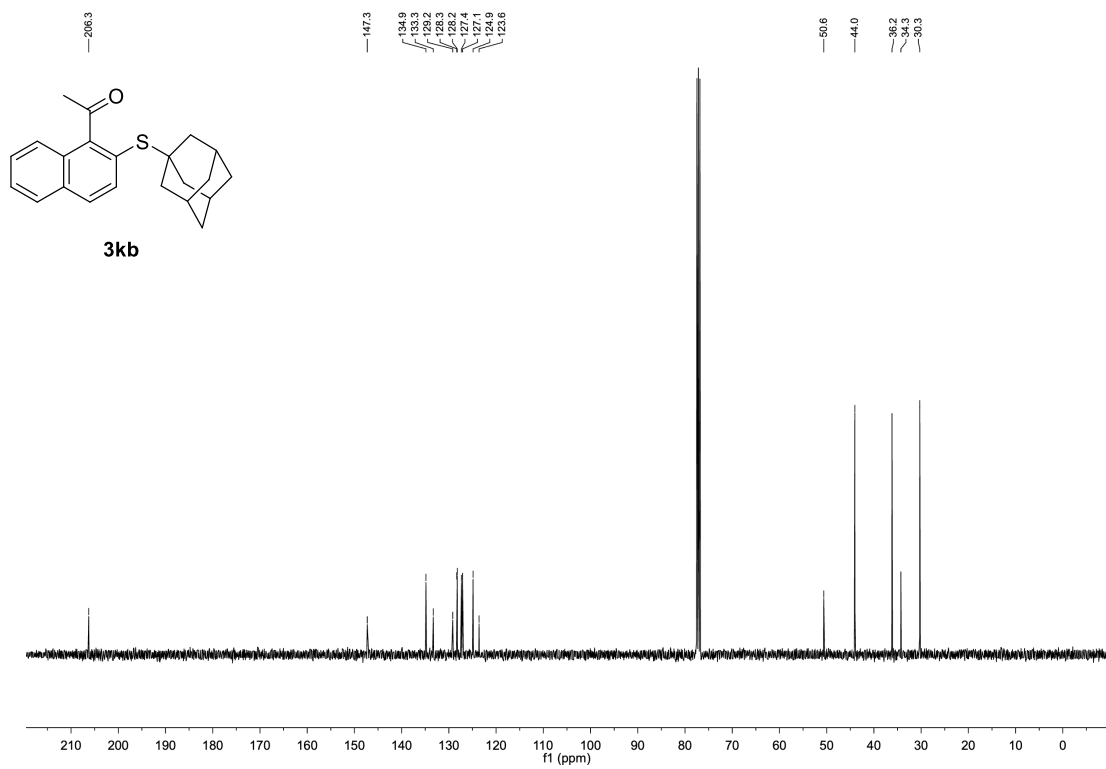

Figure S115.  $^{13}\text{C}$ -NMR-spectrum (101 MHz,  $\text{CDCl}_3$ ) of **3kb**.

**Ethyl 2-(((1*s*,3*s*)-adamantan-1-yl)thio)benzoate (**3b**):**

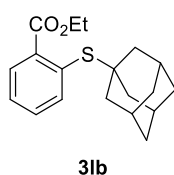

C<sub>19</sub>H<sub>24</sub>O<sub>2</sub>S (316.46 g/mol)

Following **GP-C**, **3b** was synthesized using ethyl 2-(((trifluoromethyl)sulfonyl)oxy)benzoate (**1l**) (298 mg, 1.00 mmol, 1.0 equiv.) and 1-adamantane thiol (**2b**) (177 mg, 1.05 mmol, 1.05 equiv.). The reaction time was prolonged to 6 h. Purification by flash chromatography (SiO<sub>2</sub>, gradient *n*-hexane/EtOAc 100:0 to 90:10 over 10 CV) afforded **3b** (245 mg, 775 μmol, 78%) as colorless oil.

**R<sub>f</sub>**: 0.56 (*n*-hexane/EtOAc 90:10).

**<sup>1</sup>H-NMR** (400 MHz, CDCl<sub>3</sub>, δ): 7.60 – 7.51 (m, 2H), 7.41 – 7.34 (m, 2H), 4.38 (q, *J* = 7.1 Hz, 2H), 2.03 – 1.96 (m, 3H), 1.82 – 1.77 (m, 6H), 1.65 – 1.55 (m, 6H), 1.39 (t, *J* = 7.1 Hz, 3H).

**<sup>13</sup>C-NMR** (101 MHz, CDCl<sub>3</sub>, δ): 168.8, 140.3, 139.3, 129.8, 129.4, 128.5, 128.4, 61.4, 49.5, 43.9, 36.2, 30.2, 14.4.

**HR-MS** (ESI): *m/z* calc for [M+Na]<sup>+</sup> 339.13892, found 339.13908.

**IR** (ATR,  $\bar{\nu}$  [cm<sup>-1</sup>]): 2980 (w), 2902 (s), 2849 (m), 1723 (s), 1443 (w), 1363 (w), 1285 (s), 1243 (s), 1213 (m), 1169 (w), 1109 (s), 1053 (m), 1031 (m), 975 (w), 897 (w), 852 (w), 822 (w), 736 (s), 710 (s).

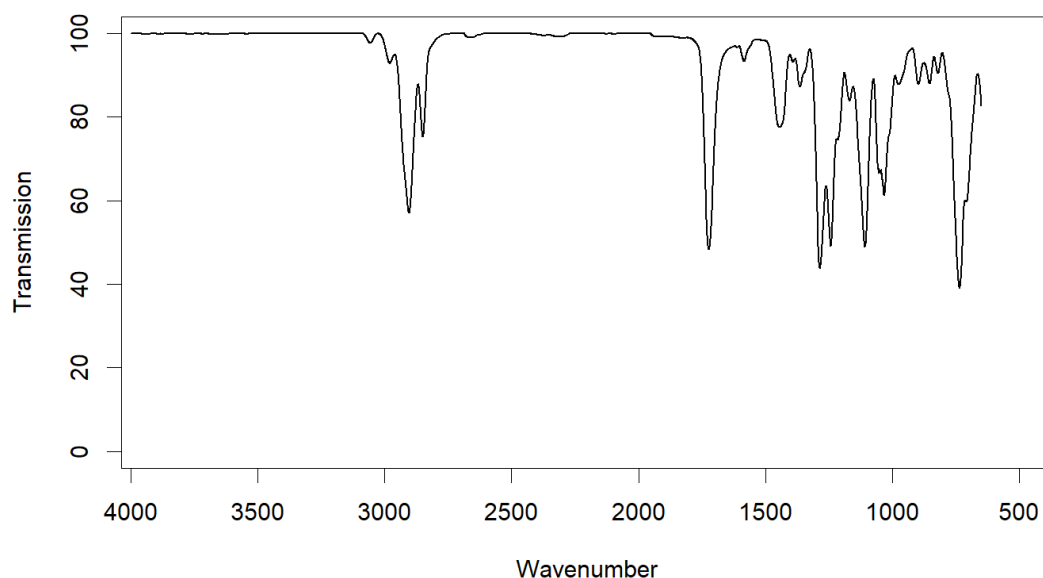

**Figure S116.** IR-spectrum (ATR, neat) of **3b**.



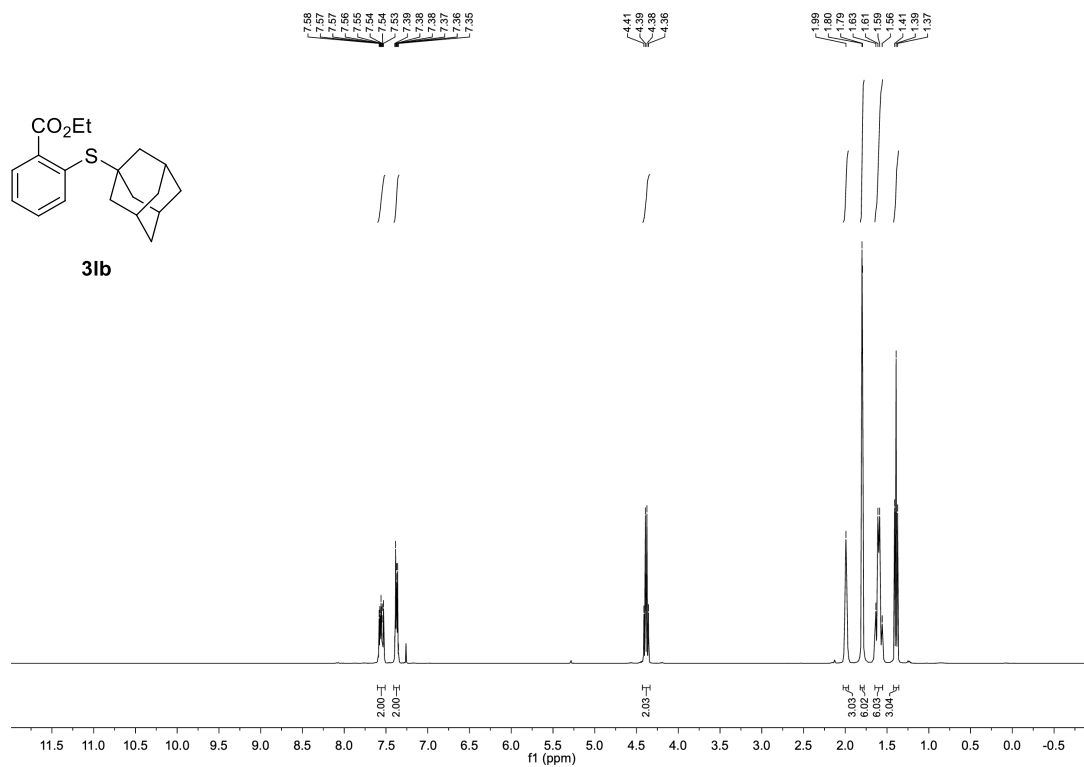

**Figure S117.** <sup>1</sup>H-NMR-spectrum (400 MHz, CDCl<sub>3</sub>) of **3lb**.

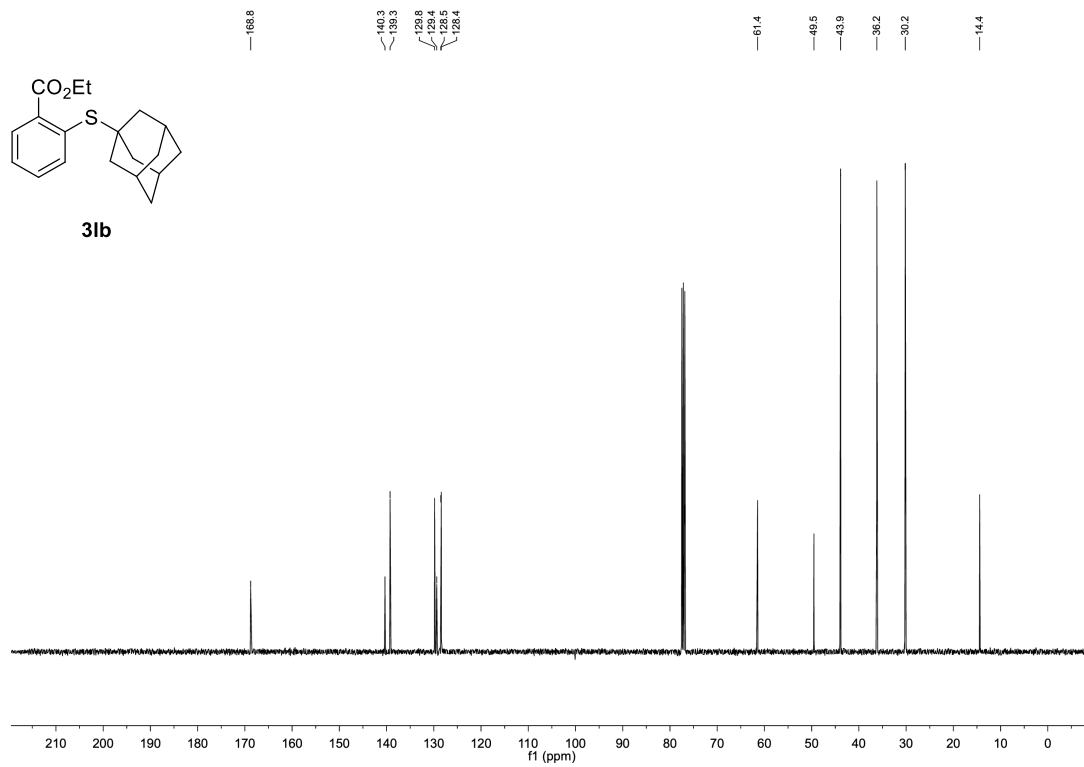

**Figure S118.** <sup>13</sup>C-NMR-spectrum (101 MHz, CDCl<sub>3</sub>) of **3lb**.

**2-(2-(((1*s*,3*s*)-Adamantan-1-yl)thio)phenyl)-4,4,5,5-tetramethyl-1,3,2-dioxaborolane (3mb):**

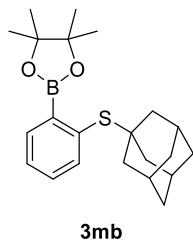

$C_{22}H_{31}BO_2S$  (370.36 g/mol)

Following **GP-C**, **3mb** was synthesized using 2-(4,4,5,5-tetramethyl-1,3,2-dioxaborolan-2-yl)phenyl trifluoromethanesulfonate (**1m**) (352 mg, 1.00 mmol, 1.0 equiv.) and 1-adamantane thiol (**2b**) (177 mg, 1.05 mmol, 1.05 equiv.). Purification by flash chromatography ( $SiO_2$ , gradient *n*-hexane/EtOAc 100:0 to 95:5 over 10 CV) afforded **3mb** (288 mg, 778  $\mu$ mol, 78%) as colorless solid.

**R<sub>f</sub>**: 0.66 (*n*-hexane/EtOAc 95:5).

**m. p.**: 88.8 – 89.3 °C.

**<sup>1</sup>H-NMR** (400 MHz,  $CDCl_3$ ,  $\delta$ ): 7.54 – 7.47 (m, 2H), 7.35 – 7.29 (m, 2H), 2.04 – 1.97 (m, 3H), 1.86 – 1.80 (m, 6H), 1.66 – 1.56 (m, 6H), 1.40 (s, 12H).

**<sup>13</sup>C-NMR** (101 MHz,  $CDCl_3$ ,  $\delta$ ): 138.2, 134.6, 133.4, 129.4, 127.8, 84.2, 48.5, 44.0, 36.4, 30.2, 25.1.

**HR-MS** (ESI): *m/z* calc for  $[M+H]^+$  371.22145, found 371.22178.

**IR** (ATR,  $\tilde{\nu}$  [ $cm^{-1}$ ]): 2980 (w), 2898 (m), 2846 (w), 1586 (w), 1474 (w), 1448 (w), 1426 (w), 1377 (w), 1343 (s), 1302 (s), 1250 (w), 1217 (w), 1146 (m), 1098 (m), 1034 (m), 963 (w), 855 (m), 822 (w), 755 (m), 670 (m).

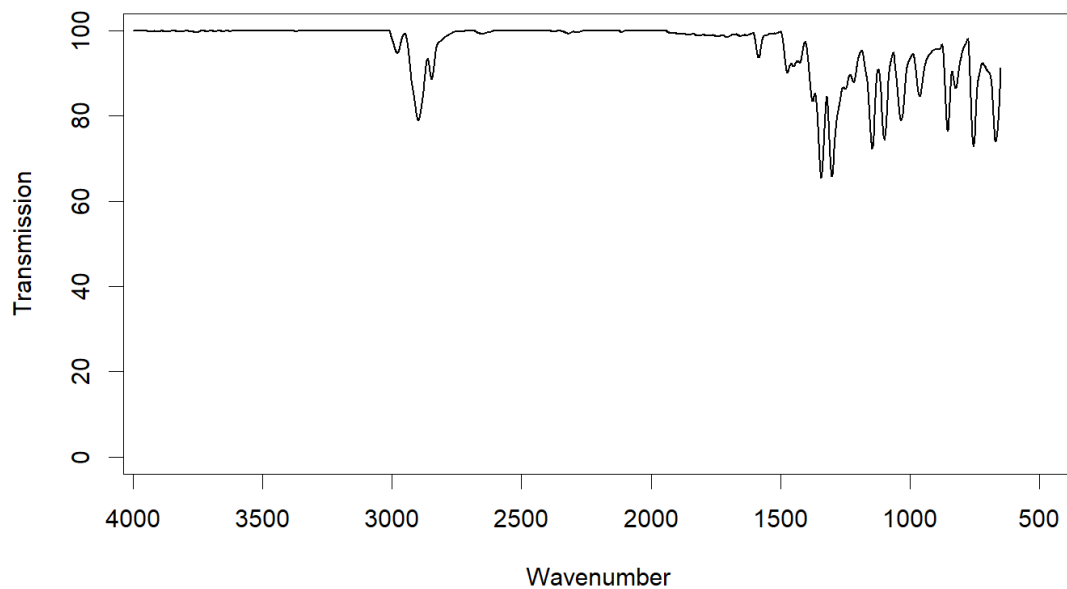

Figure S119. IR-spectrum (ATR, neat) of **3mb**.

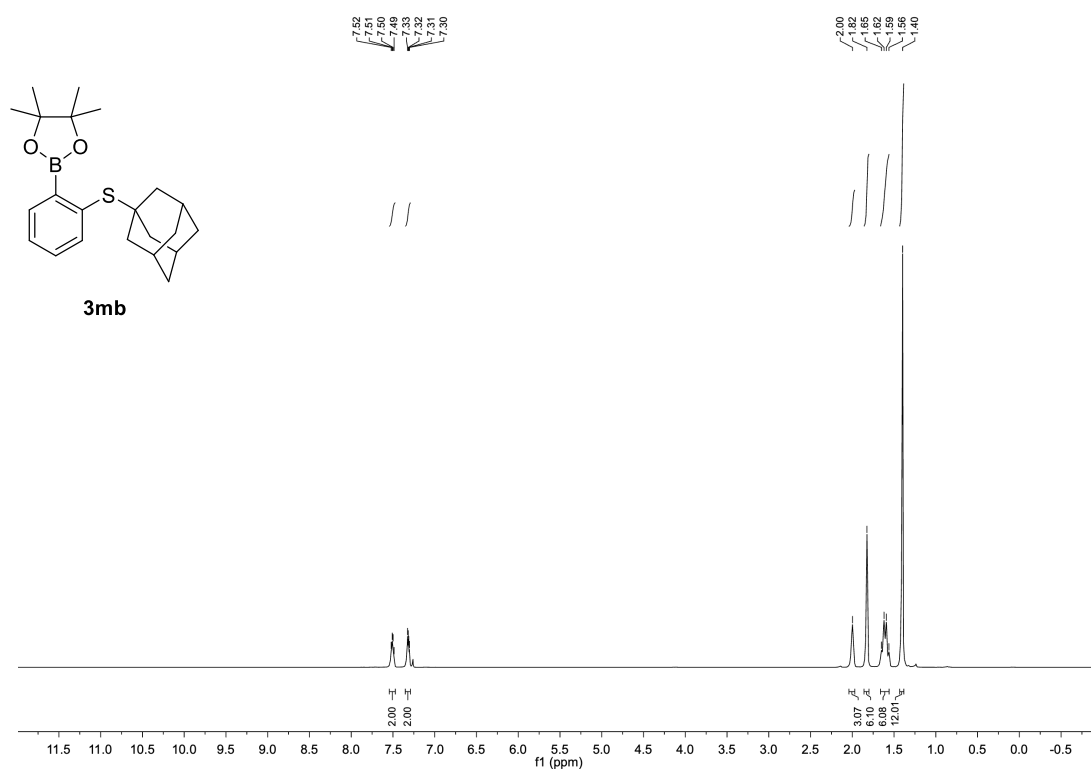

Figure S120.  $^1\text{H-NMR}$ -spectrum (400 MHz,  $\text{CDCl}_3$ ) of **3mb**.

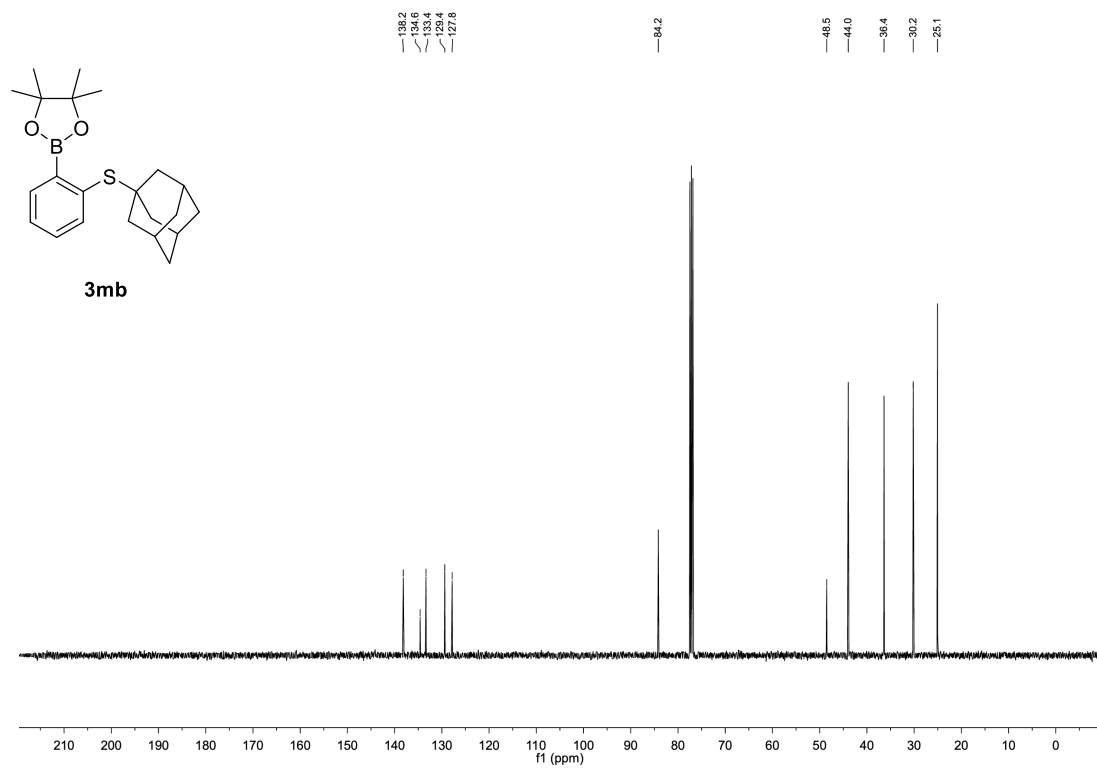

Figure S121.  $^{13}\text{C}$ -NMR-spectrum (101 MHz,  $\text{CDCl}_3$ ) of **3mb**.

**1-(4-(((1*s*,3*s*)-Adamantan-1-yl)thio)-3-methoxyphenyl)ethan-1-one (**3nb**):**

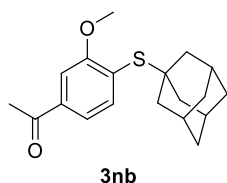

C<sub>19</sub>H<sub>24</sub>O<sub>2</sub>S (316.46 g/mol)

Following **GP-B**, **3nb** was synthesized using 4-acetyl-2-methoxyphenyl trifluoromethanesulfonate (**1n**) (298 mg, 1.00 mmol, 1.0 equiv.) and 1-adamantane thiol (**2b**) (177 mg, 1.05 mmol, 1.05 equiv.). Purification by flash chromatography (SiO<sub>2</sub>, gradient *n*-hexane/EtOAc 100:0 to 80:20 over 10 CV) afforded **3nb** (310 mg, 979 μmol, 98%) as colorless solid.

**R<sub>f</sub>**: 0.42 (*n*-hexane/EtOAc 90:10).

**m. p.**: 104.2 – 107.3 °C.

**<sup>1</sup>H-NMR** (400 MHz, CDCl<sub>3</sub>, δ): 7.57 (d, *J* = 7.8 Hz, 1H), 7.50 (d, *J* = 1.7 Hz, 1H), 7.46 (dd, *J* = 7.8, 1.7 Hz, 1H), 3.92 (s, 3H), 2.61 (s, 3H), 2.03 – 1.97 (m, 3H), 1.88 – 1.83 (m, 6H), 1.67 – 1.57 (m, 6H).

**<sup>13</sup>C-NMR** (101 MHz, CDCl<sub>3</sub>, δ): 197.8, 161.5, 139.9, 138.9, 125.8, 120.7, 109.5, 56.1, 50.2, 43.8, 36.3, 30.3, 26.8.

**HR-MS** (ESI): *m/z* calc for [M+Na]<sup>+</sup> 339.13892, found 339.13942.

**IR** (ATR,  $\tilde{\nu}$  [cm<sup>-1</sup>]): 2902 (m), 2846 (w), 1679 (m), 1582 (w), 1556 (w), 1456 (m), 1392 (m), 1344 (w), 1273 (s), 1251 (m), 1217 (s), 1180 (m), 1146 (w), 1097 (w), 1057 (w), 1027 (s), 971 (m), 870 (m), 810 (m), 770 (w), 710 (m), 684 (m).

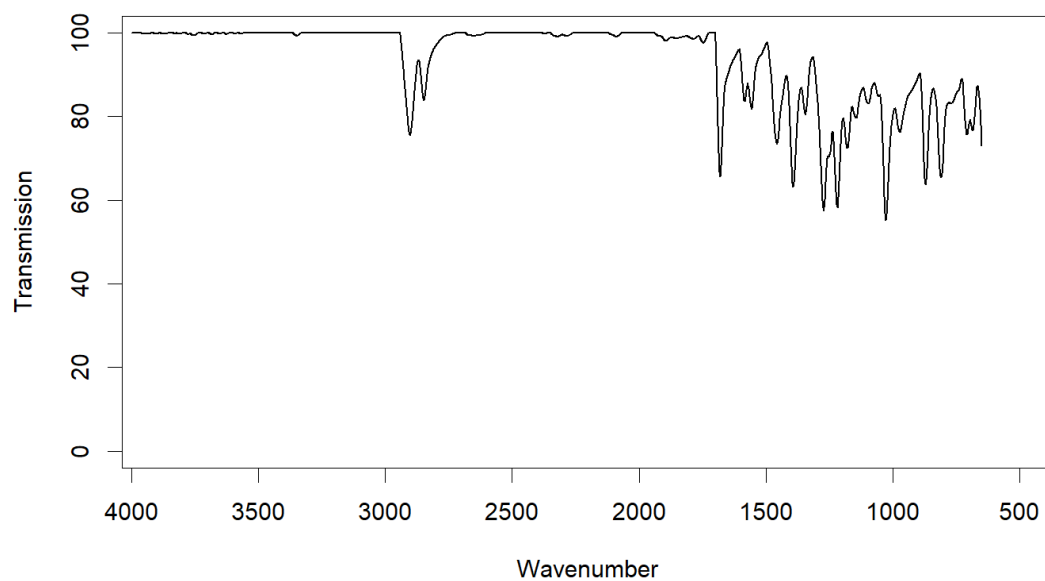

**Figure S122.** IR-spectrum (ATR, neat) of **3nb**.

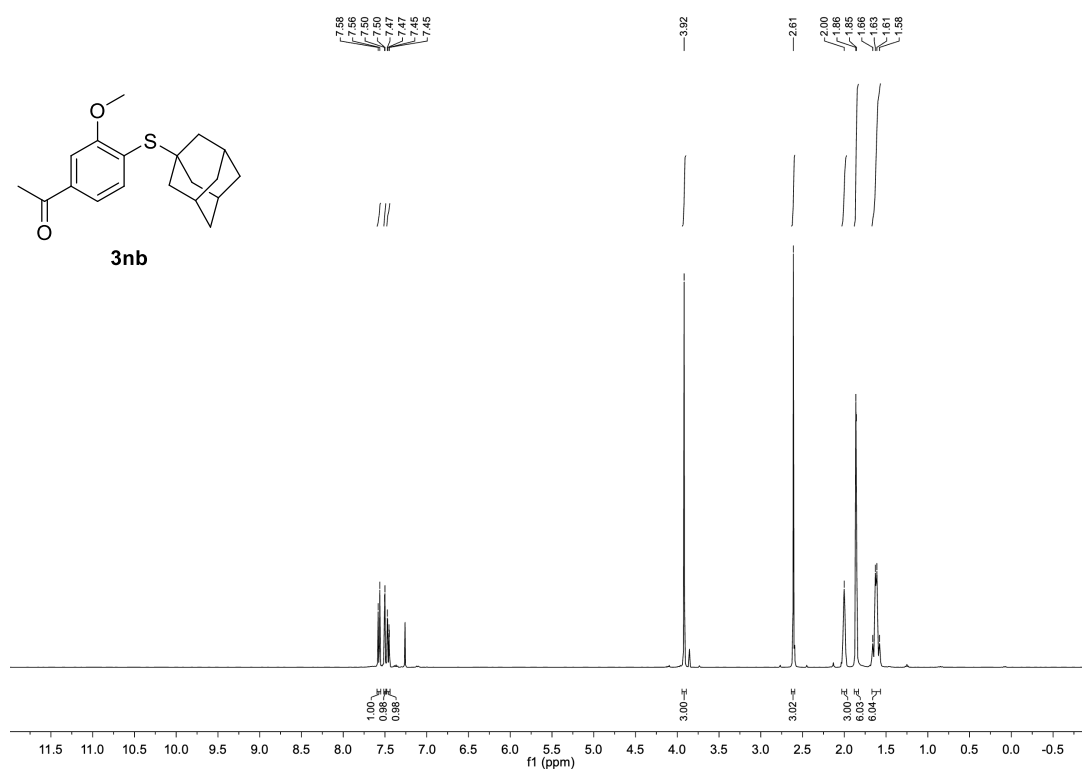

**Figure S123.**  $^1\text{H-NMR}$ -spectrum (400 MHz,  $\text{CDCl}_3$ ) of **3nb**.

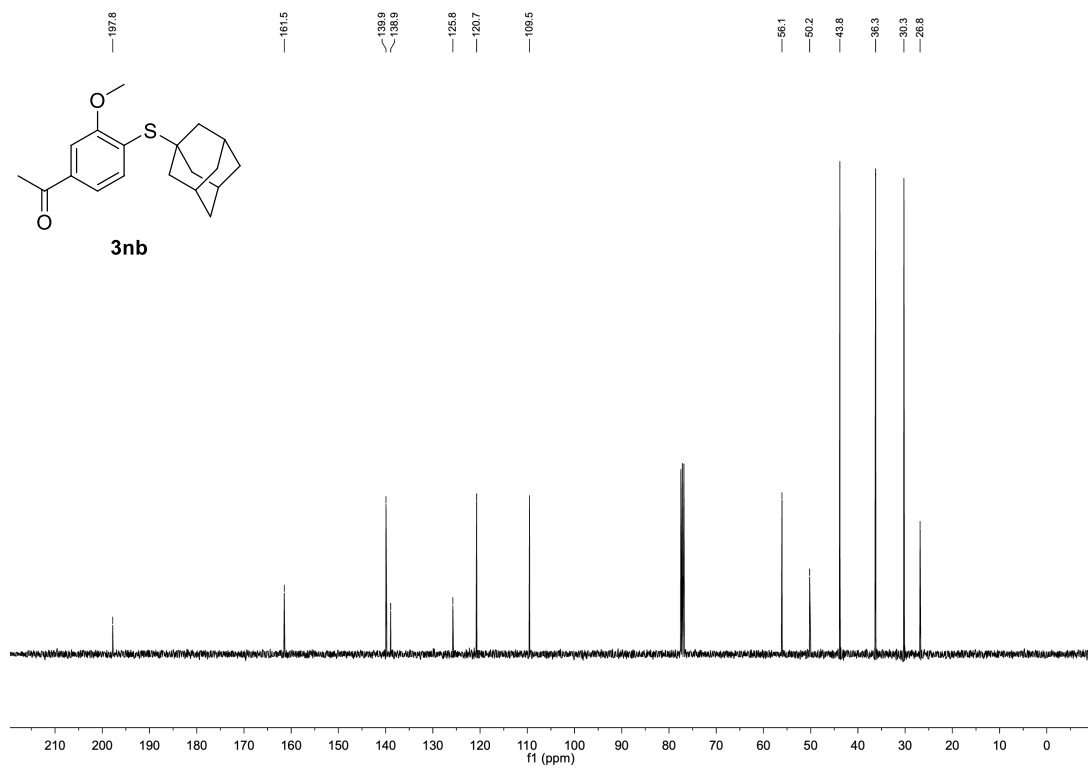

**Figure S124.**  $^{13}\text{C}$ -NMR-spectrum (101 MHz,  $\text{CDCl}_3$ ) of **3nb**.

### 3-(((1*s*,3*s*)-Adamantan-1-yl)thio)-2-phenylpyridine (**3ob**):

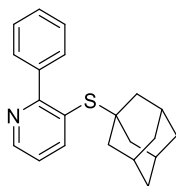

**3ob**

C<sub>21</sub>H<sub>23</sub>NS (321.48 g/mol)

Following **GP-B**, **3ob** was synthesized using 2-phenylpyridin-3-yl trifluoromethanesulfonate (**1o**) (303 mg, 1.00 mmol, 1.0 equiv.) and 1-adamantane thiol (**2b**) (177 mg, 1.05 mmol, 1.05 equiv.). The reaction time was prolonged to 6 h. Purification by flash chromatography (SiO<sub>2</sub>, gradient *n*-hexane/EtOAc 100:0 to 70:30 over 10 CV) afforded a mixture of starting material and product. This mixture was dissolved in THF (10 ml) and an aqueous solution of NBu<sub>4</sub>OH (649 mg, 40% w/w, 1 equiv.) was added and stirred for 16 h. The solution was dried over MgSO<sub>4</sub>, filtered and the solvent was removed under reduced pressure. The resulting yellow oil was purified by flash chromatography (SiO<sub>2</sub>, gradient *n*-hexane/EtOAc 100:0 to 70:30 over 10 CV) to give **3ob** (231 mg, 720 μmol, 72%) as colorless sticky honey.

**R<sub>f</sub>**: 0.36 (*n*-hexane/EtOAc 90:10).

**<sup>1</sup>H-NMR** (400 MHz, CDCl<sub>3</sub>, δ): 8.65 (dd, *J* = 4.7, 1.7 Hz, 1H), 7.95 (dd, *J* = 7.8, 1.7 Hz, 1H), 7.67 – 7.63 (m, 2H), 7.44 – 7.34 (m, 3H), 7.21 (dd, *J* = 7.8, 4.7 Hz, 1H), 1.92 – 1.86 (m, 3H), 1.57 – 1.45 (m, 12H).

**<sup>13</sup>C-NMR** (101 MHz, CDCl<sub>3</sub>, δ): 164.7, 149.3, 147.5, 140.8, 130.7, 128.1, 127.5, 126.1, 121.6, 50.6, 43.6, 36.1, 30.0.

**HR-MS** (ESI): *m/z* calc for [M+H]<sup>+</sup> 322.16240, found 322.16298.

**IR** (ATR,  $\tilde{\nu}$  [cm<sup>-1</sup>]): 3032 (w), 2901 (s), 2846 (m), 1549 (w), 1448 (m), 1407 (s), 1343 (w), 1292 (m), 1258 (w), 1180 (w), 1124 (w), 1097 (w), 1028 (s), 971 (w), 915 (w), 795 (m), 740 (s), 691 (s).



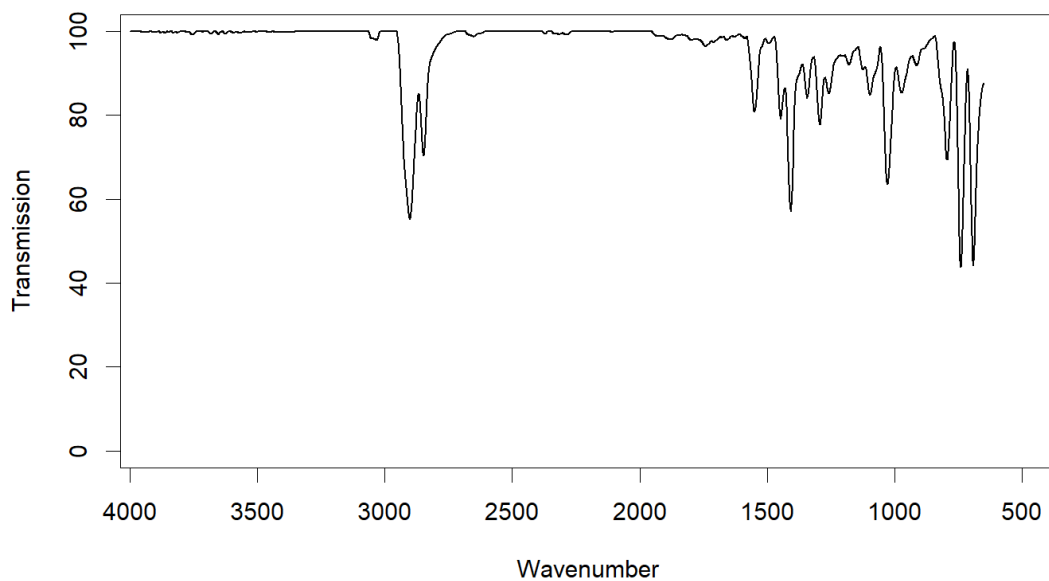

Figure S125. IR-spectrum (ATR, neat) of **3ob**.

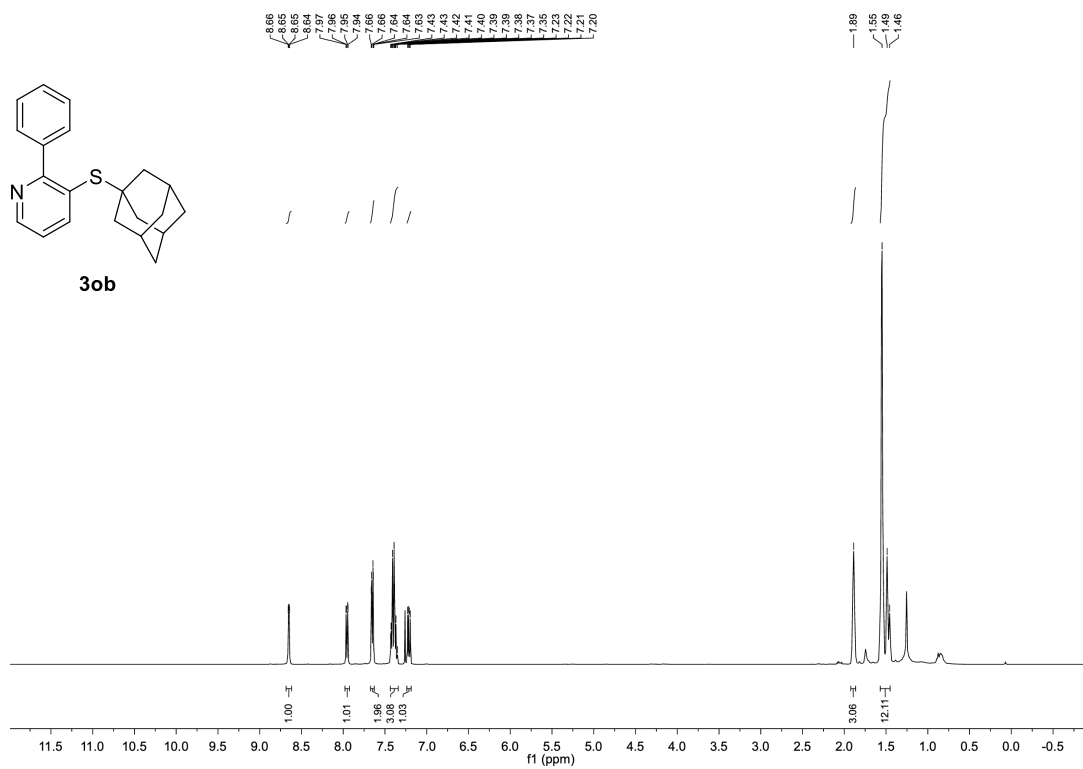

Figure S126. <sup>1</sup>H-NMR-spectrum (400 MHz, CDCl<sub>3</sub>) of **3ob**.

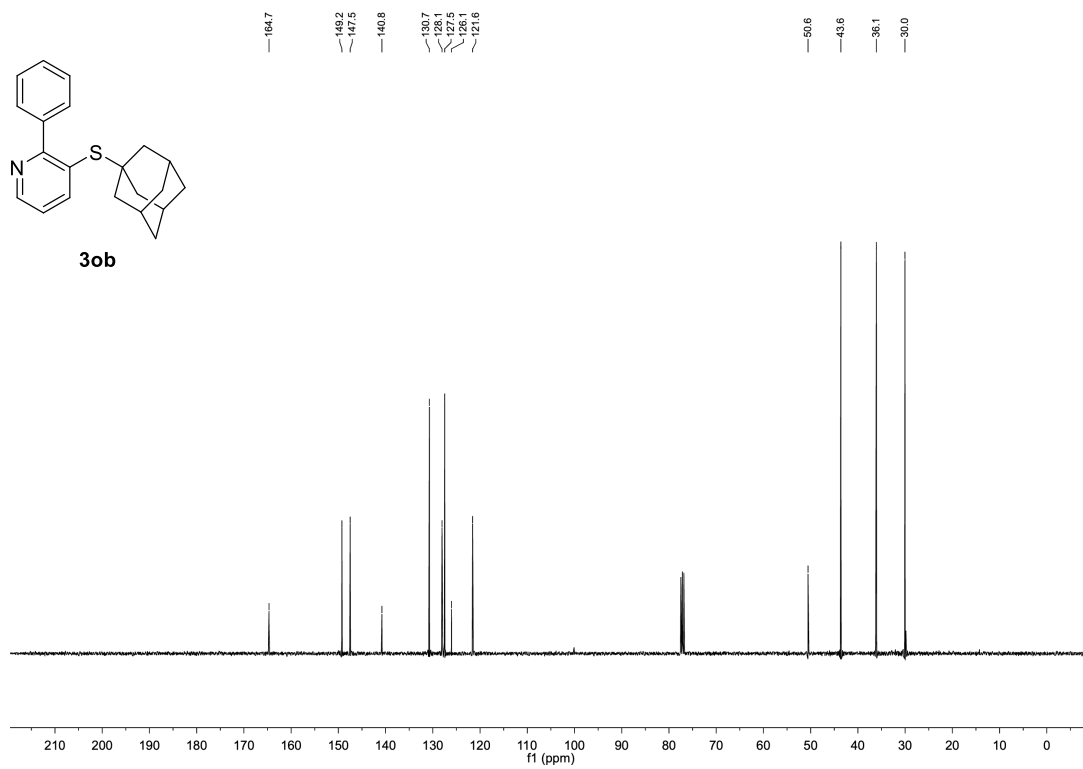

**Figure S127.**  $^{13}\text{C-NMR}$ -spectrum (101 MHz,  $\text{CDCl}_3$ ) of **3ob**.

**6-(((1s,3s)-Adamantan-1-yl)thio)-7-methylquinoline (3pb):**

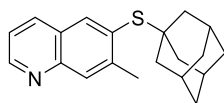

**3pb**

C<sub>20</sub>H<sub>23</sub>NS (309.47 g/mol)

Following **GP-B**, **3pb** was synthesized using 6-bromo-7-methylquinoline (**1p**) (222 mg, 1.00 mmol, 1.0 equiv.) and 1-adamantane thiol (**2b**) (177 mg, 1.05 mmol, 1.05 equiv.). Purification by flash chromatography (SiO<sub>2</sub>, gradient *n*-hexane/EtOAc 100:0 to 90:10 over 10 CV, then to 30:70 over 8 CV) afforded **3pb** (263 mg, 850 μmol, 85%) as colorless solid.

**R<sub>f</sub>**: 0.16 (*n*-hexane/EtOAc 95:5).

**m. p.**: 142.0 – 143.7 °C.

**<sup>1</sup>H-NMR** (400 MHz, CDCl<sub>3</sub>, δ): 8.92 – 8.85 (m, 1H), 8.14 – 8.06 (m, 1H), 8.03 – 7.95 (m, 2H), 7.35 (dd, *J* = 8.3, 4.2 Hz, 1H), 2.70 (s, 3H), 2.04 – 1.98 (m, 3H), 1.92 – 1.85 (m, 6H), 1.67 – 1.55 (m, 6H).

**<sup>13</sup>C-NMR** (101 MHz, CDCl<sub>3</sub>, δ): 151.2, 151.2, 148.5, 145.0, 138.5, 135.7, 130.4, 129.6, 126.6, 120.7, 50.1, 43.9, 36.3, 30.2, 22.9.

**HR-MS** (ESI): *m/z* calc for [M+H]<sup>+</sup> 310.16240, found 310.16289.

**IR** (ATR,  $\tilde{\nu}$  [cm<sup>-1</sup>]): 2917 (m), 2887 (m), 2846 (m), 1612 (w), 1582 (w), 1556 (w), 1467 (m), 1445 (m), 1373 (w), 1337 (w), 1295 (m), 1254 (w), 1187 (w), 1105 (w), 1035 (m), 1001 (w), 971 (w), 915 (w), 878 (m), 818 (w), 796 (w), 766 (m), 681 (w).

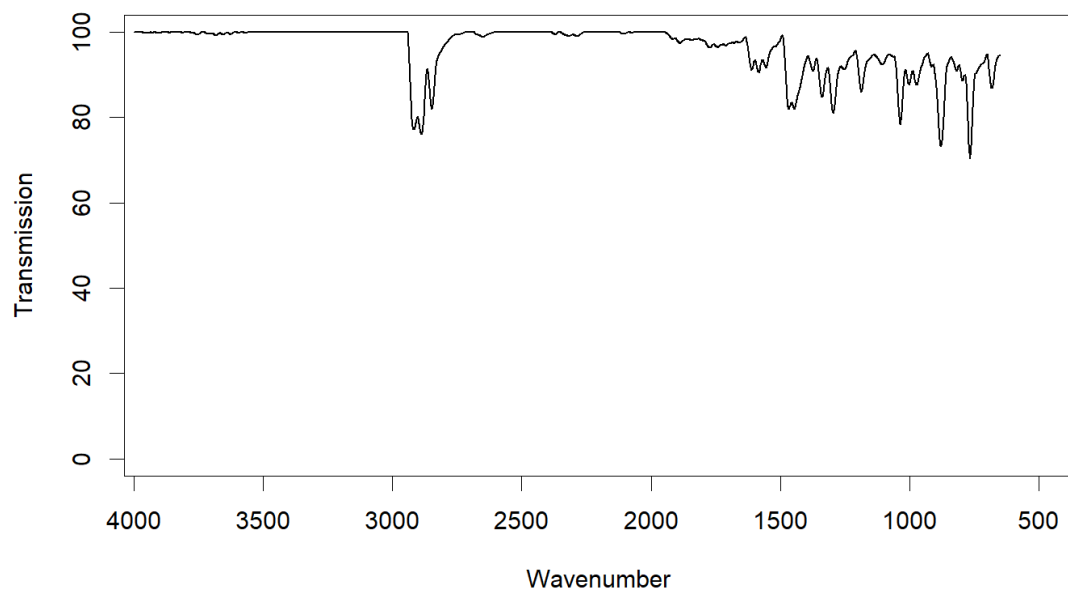

**Figure S128.** IR-spectrum (ATR, neat) of **3pb**.

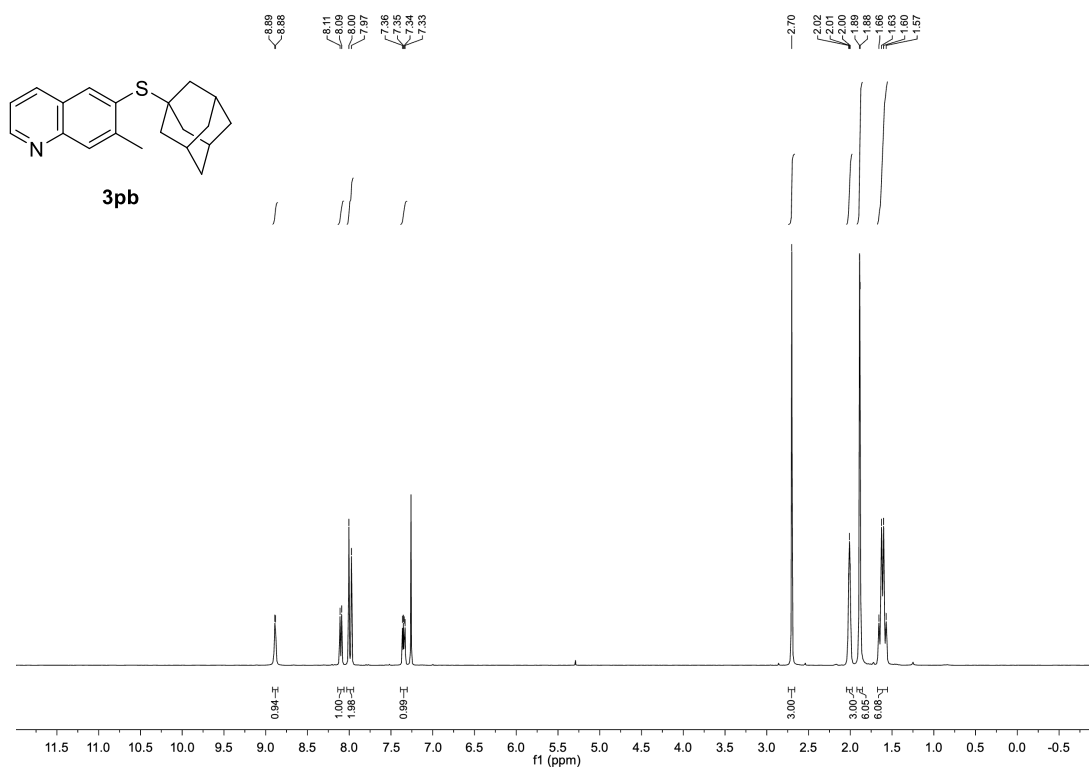

**Figure S129.**  $^1\text{H-NMR}$ -spectrum (400 MHz,  $\text{CDCl}_3$ ) of **3pb**.

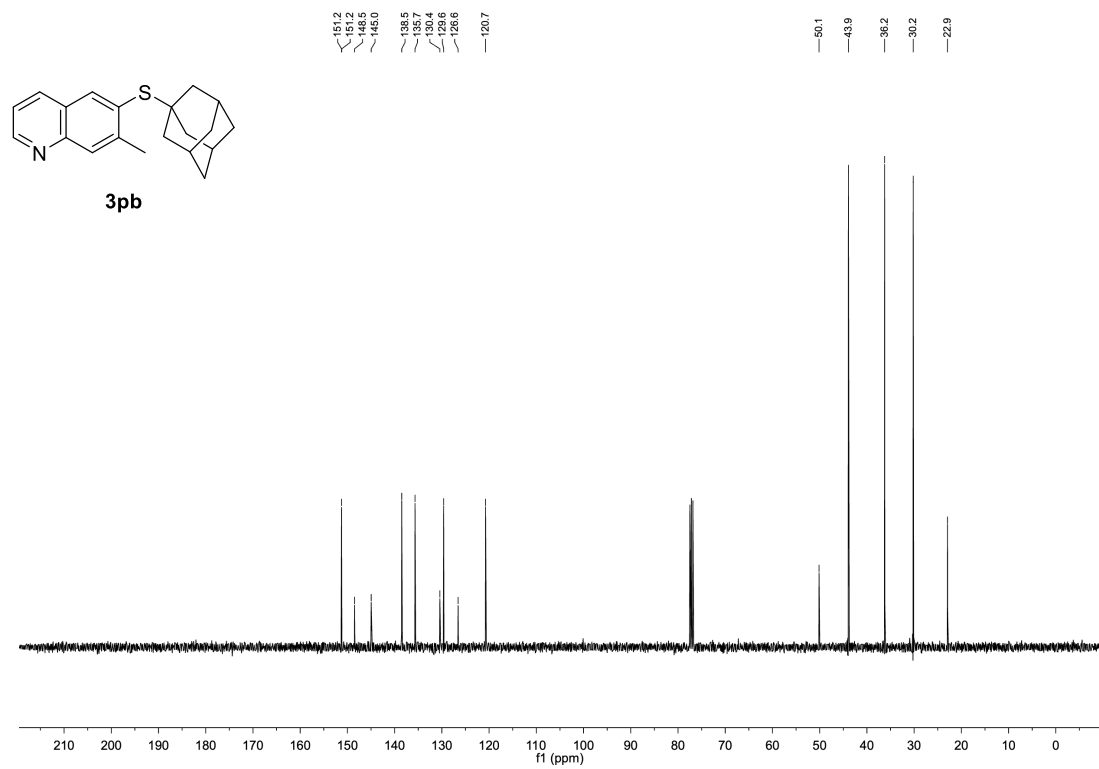

Figure S130.  $^{13}\text{C}$ -NMR-spectrum (101 MHz,  $\text{CDCl}_3$ ) of **3pb**.

**1-(3-(((1s,3s)-Adamantan-1-yl)thio)thiophen-2-yl)ethan-1-one (3qb):**

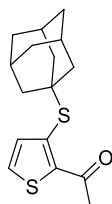

**3qb**

C<sub>16</sub>H<sub>20</sub>OS<sub>2</sub> (292.45 g/mol)

Following **GP-C**, **3qb** was synthesized using 1-(3-bromothiophen-2-yl)ethan-1-one (**1q**) (205 mg, 1.00 mmol, 1.0 equiv.) and 1-adamantane thiol (**2b**) (177 mg, 1.05 mmol, 1.05 equiv.). The reaction time was prolonged to 6 h. Purification by flash chromatography (SiO<sub>2</sub>, gradient *n*-hexane/EtOAc 100:0 to 85:15 over 10 CV) afforded **3qb** (246 mg, 841 μmol, 84%) as colorless solid.

**R<sub>f</sub>**: 0.77 (*n*-hexane/EtOAc 90:10).

**m. p.**: 51.9 – 54.1 °C.

**<sup>1</sup>H-NMR** (400 MHz, CDCl<sub>3</sub>, δ): 7.51 (d, *J* = 5.1 Hz, 1H), 7.13 (d, *J* = 5.1 Hz, 1H), 2.80 (s, 3H), 2.08 – 2.03 (m, 3H), 1.92 – 1.87 (m, 6H), 1.70 – 1.60 (m, 6H).

**<sup>13</sup>C-NMR** (101 MHz, CDCl<sub>3</sub>, δ): 192.9, 146.9, 137.3, 132.4, 130.2, 51.1, 44.1, 36.2, 30.5, 30.2.

**HR-MS** (ESI): *m/z* calc for [M+Na]<sup>+</sup> 315.08478, found 315.08507.

**IR** (ATR,  $\tilde{\nu}$  [cm<sup>-1</sup>]): 3110 (w), 2893 (m), 2846 (m), 1646 (s), 1522 (w), 1478 (w), 1448 (w), 1418 (w), 1385 (s), 1347 (s), 1291 (m), 1251 (s), 1180 (w), 1154 (w), 1079 (w), 1031 (s), 975 (w), 948 (m), 882 (m), 820 (m), 758 (s), 684 (m).

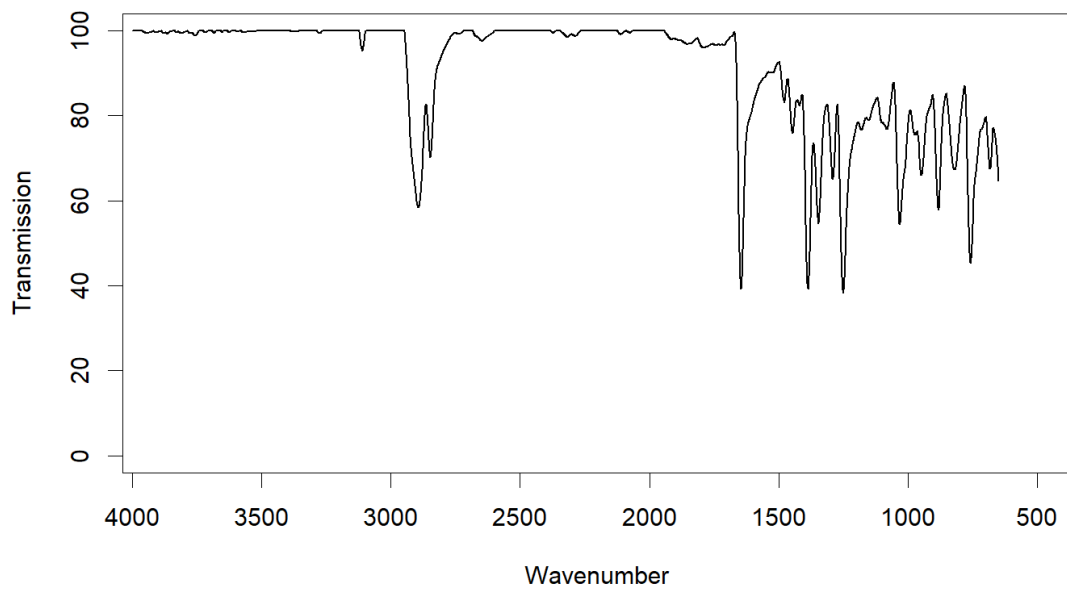

Figure S131. IR-spectrum (ATR, neat) of **3qb**.

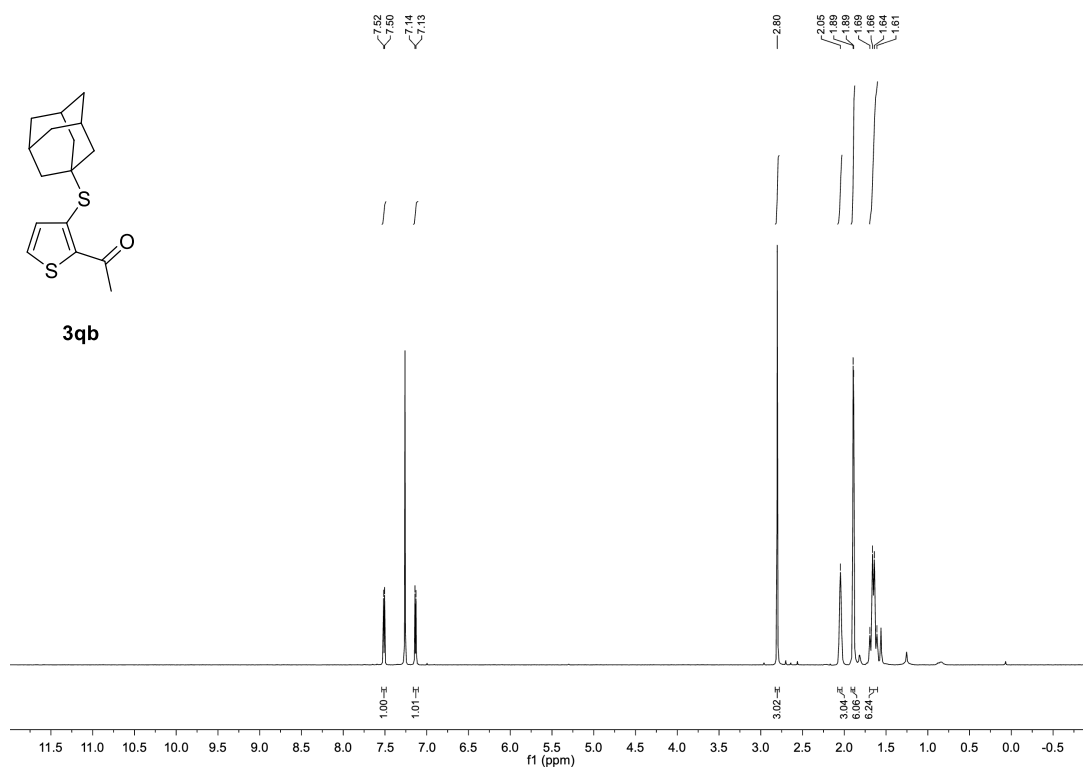

Figure S132. <sup>1</sup>H-NMR-spectrum (400 MHz, CDCl<sub>3</sub>) of **3qb**.

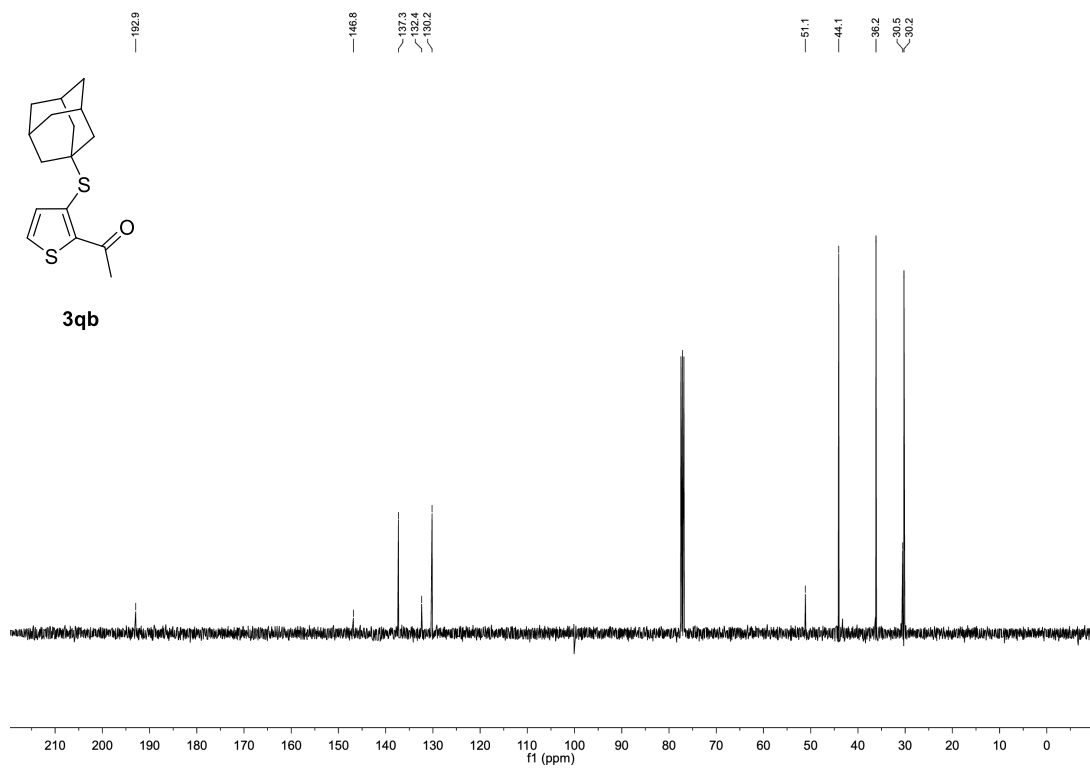

**Figure S133.**  $^{13}\text{C}$ -NMR-spectrum (101 MHz,  $\text{CDCl}_3$ ) of **3qb**.



**8-(((3s,5s,7s)-Adamantan-1-yl)thio)chroman-4-one (3rb):**

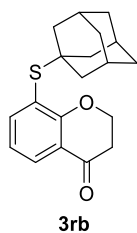

C<sub>19</sub>H<sub>22</sub>O<sub>2</sub>S (314.44 g/mol)

Following **GP-B**, **3rb** was synthesized using 8-bromochroman-4-one (**1r**) (227 mg, 1.00 mmol, 1.0 equiv.) and 1-adamantane thiol (**2b**) (177 mg, 1.05 mmol, 1.05 equiv.). The reaction temperature was set to 60 °C and the time to 6 h. Purification by flash chromatography (SiO<sub>2</sub>, gradient *n*-hexane/EtOAc 100:0 to 80:20 over 15 CV) afforded **3rb** (291 mg, 925 μmol, 93%) as colorless solid.

**R<sub>f</sub>**: 0.33 (*n*-hexane/EtOAc 90:10).

**m. p.**: 74.7 – 78.8 °C.

**<sup>1</sup>H-NMR** (400 MHz, CDCl<sub>3</sub>, δ): 7.92 (dd, *J* = 7.6, 1.9 Hz, 1H), 7.65 (dd, *J* = 7.6, 1.9 Hz, 1H), 6.96 (dd, *J* = 7.6, 7.6 Hz, 1H), 4.57 (t, *J* = 6.5 Hz, 2H), 2.81 (t, *J* = 6.5 Hz, 2H), 2.02 – 1.96 (m, 3H), 1.85 – 1.79 (m, 6H), 1.65 – 1.55 (m, 6H).

**<sup>13</sup>C-NMR** (101 MHz, CDCl<sub>3</sub>, δ): 191.8, 163.6, 146.6, 128.7, 121.9, 120.8, 119.7, 67.2, 49.4, 43.5, 37.5, 36.1, 30.1.

**HR-MS** (APCI): *m/z* calc for [M+H]<sup>+</sup> 315.14133, found 315.14126.

**IR** (ATR,  $\tilde{\nu}$  [cm<sup>-1</sup>]): 2899 (m), 2846 (w), 1686 (s), 1579 (m), 1456 (m), 1426 (m), 1374 (m), 1344 (w), 1277 (s), 1251 (m), 1213 (m), 1180 (w), 1138 (w), 1106 (w), 1068 (m), 1030 (s), 975 (w), 926 (w), 870 (w), 825 (w), 792 (m), 740 (s), 684 (m).

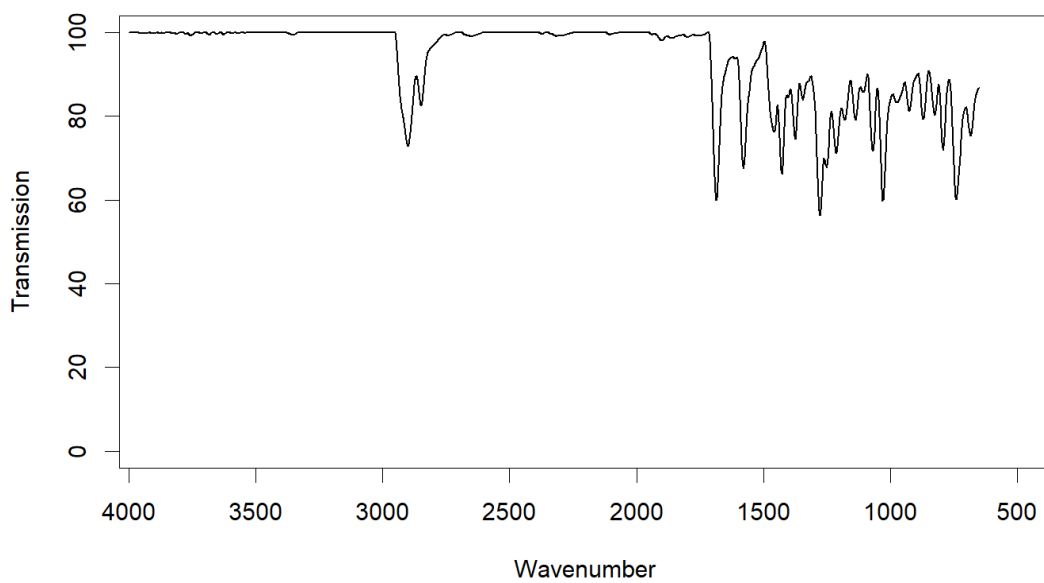

Figure S134. IR-spectrum (ATR, neat) of **3rb**.

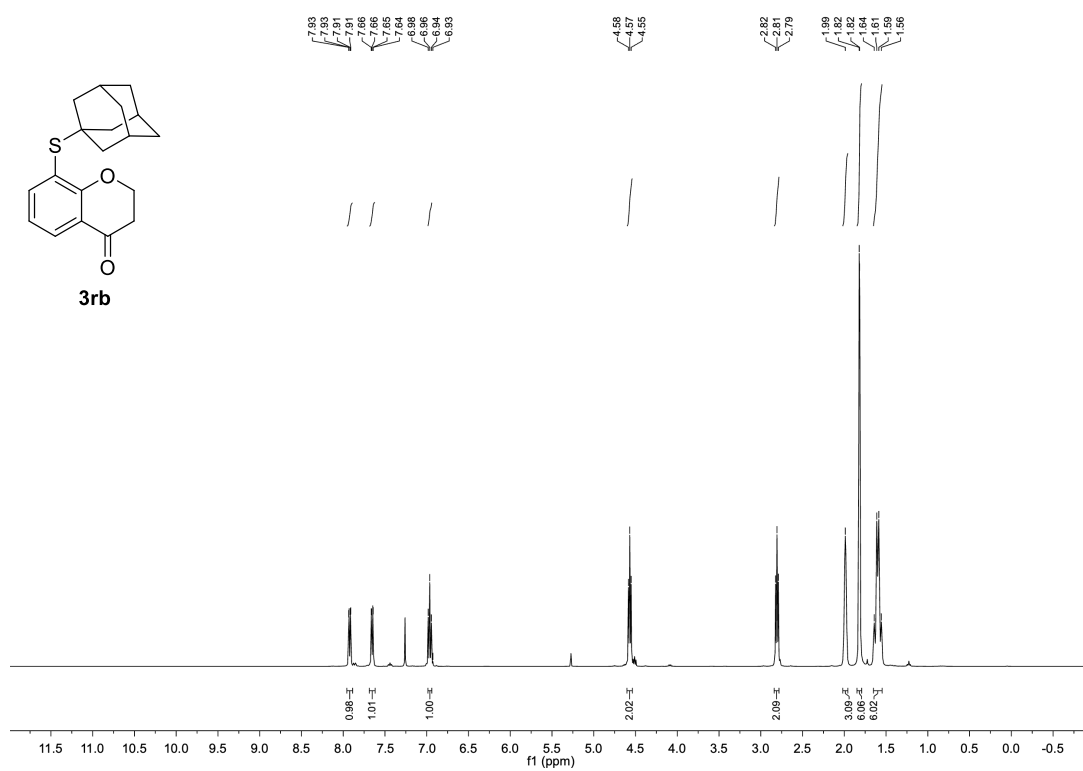

Figure S135.  $^1\text{H-NMR}$ -spectrum (400 MHz,  $\text{CDCl}_3$ ) of **3rb**.

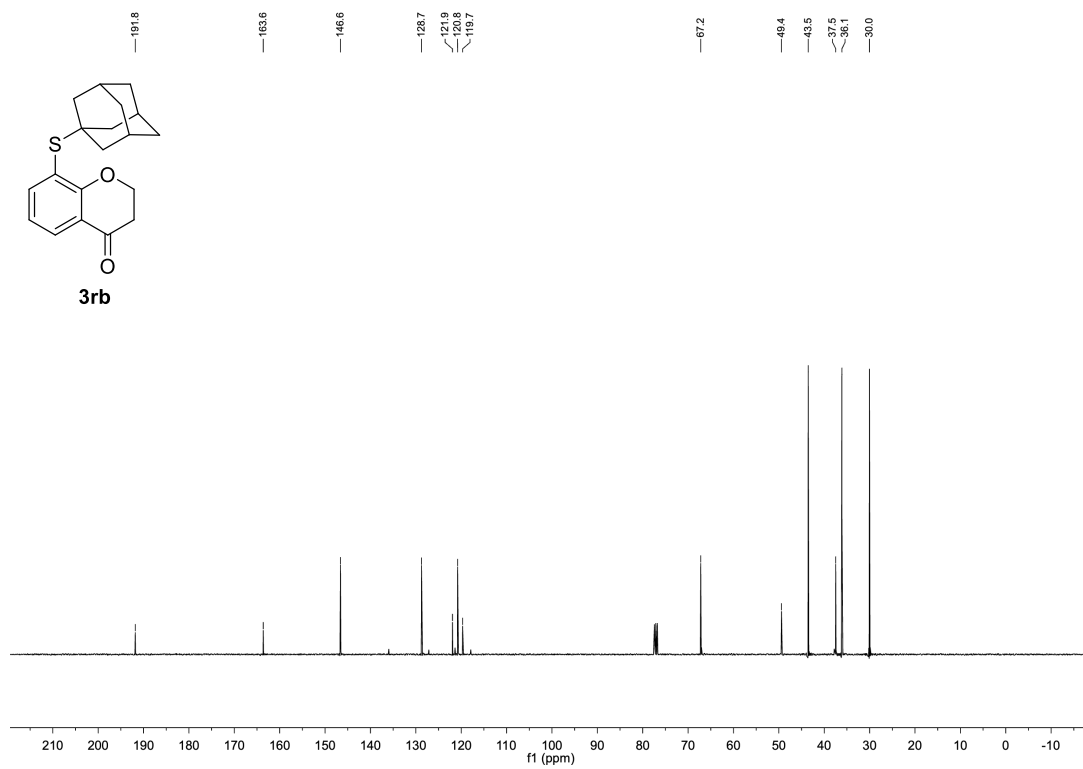

**Figure S136.**  $^{13}\text{C}$ -NMR-spectrum (101 MHz,  $\text{CDCl}_3$ ) of **3rb**.

**6-(((3s,5s,7s)-Adamantan-1-yl)thio)benzo[d][1,3]dioxole-5-carbaldehyde (3sb):**

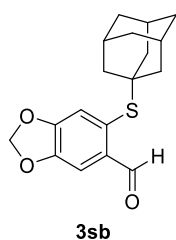

C<sub>18</sub>H<sub>20</sub>O<sub>3</sub>S (316.41 g/mol)

Following **GP-C**, **3sb** was synthesized using 6-bromobenzo[d][1,3]dioxole-5-carbaldehyde (**1s**) (229 mg, 1.00 mmol, 1.0 equiv.) and 1-adamantane thiol (**2b**) (177 mg, 1.05 mmol, 1.05 equiv.). Purification by flash chromatography (SiO<sub>2</sub>, gradient *n*-hexane/EtOAc 100:0 to 80:20 over 10 CV) afforded **3sb** (275 mg, 869 μmol, 87%) as colorless solid.

**R<sub>f</sub>**: 0.54 (*n*-hexane/EtOAc 90:10).

**m. p.**: 125.8 – 126.5 °C.

**<sup>1</sup>H-NMR** (400 MHz, CDCl<sub>3</sub>, δ): 10.61 (s, 1H), 7.44 (s, 1H), 6.99 (s, 1H), 6.09 (s, 2H), 2.06 – 2.00 (m, 3H), 1.81 – 1.77 (m, 6H), 1.68 – 1.57 (m, 6H).

**<sup>13</sup>C-NMR** (101 MHz, CDCl<sub>3</sub>, δ): 192.4, 151.8, 149.4, 135.5, 130.7, 118.9, 107.3, 102.4, 49.9, 43.8, 36.2, 30.2.

**HR-MS** (ESI): *m/z* calc for [M+Na]<sup>+</sup> 339.10254, found 339.10281.

**IR** (ATR,  $\bar{\nu}$  [cm<sup>-1</sup>]): 2887 (w), 2850 (w), 1669 (m), 1604 (w), 1501 (w), 1467 (s), 1388 (m), 1337 (m), 1299 (w), 1240 (s), 1109 (m), 1030 (s), 990 (m), 926 (m), 870 (m), 821 (w), 784 (m), 725 (w), 688 (m).

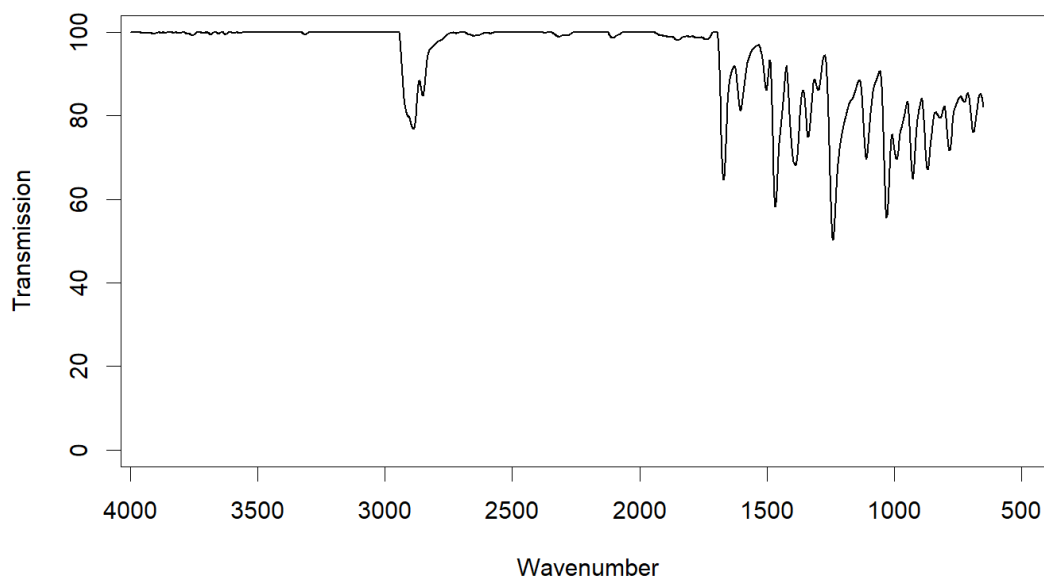

**Figure S137.** IR-spectrum (ATR, neat) of **3sb**.

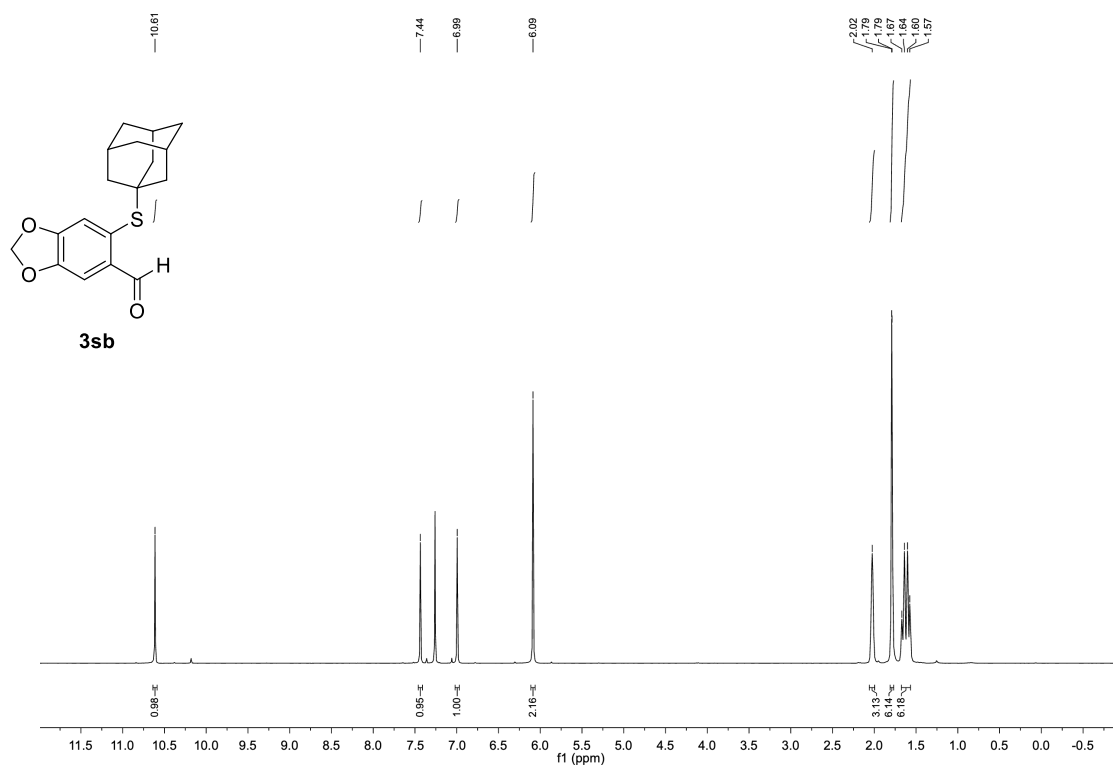

**Figure S138.** <sup>1</sup>H-NMR-spectrum (400 MHz, CDCl<sub>3</sub>) of **3sb**.

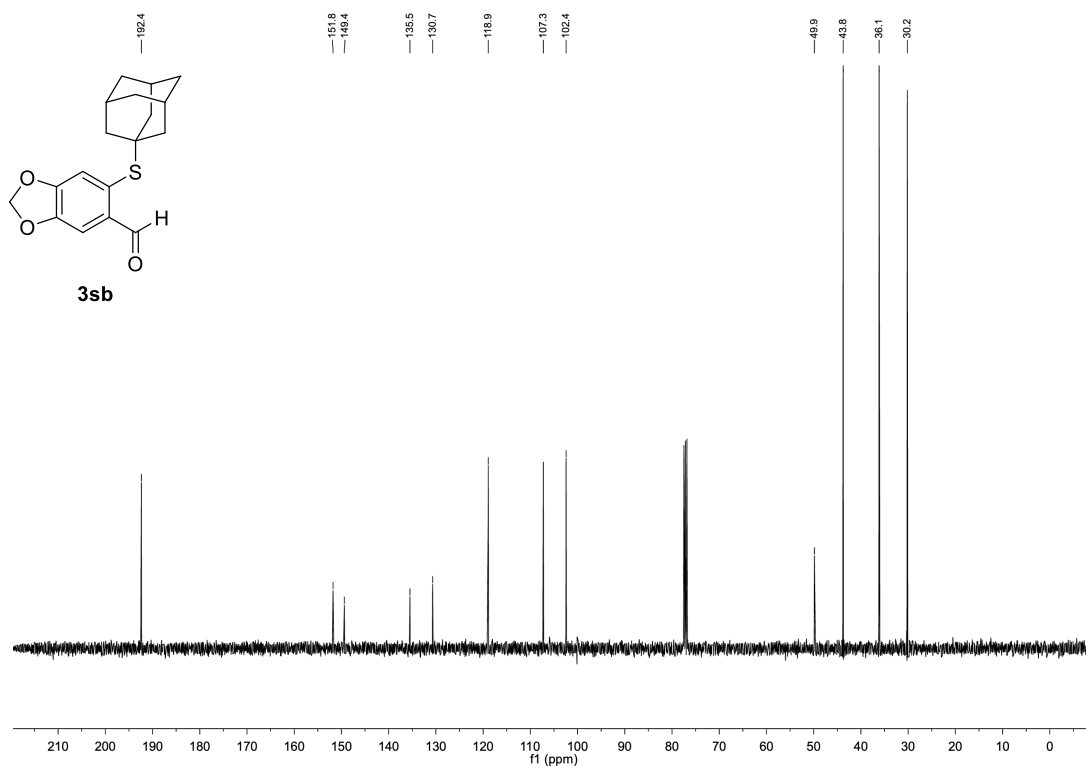

**Figure S139.** <sup>13</sup>C-NMR-spectrum (101 MHz, CDCl<sub>3</sub>) of **3sb**.

**(2aR,3R,5aS,5bS,7aR,9S,11aR,12aR)-2a,5a,8,8-Tetramethyl-3-((S)-6-methylhept-5-en-2-yl)tetradecahydro-1H,12H-cyclopenta[*a*]cyclopropa[*e*]phenanthren-9-yl (E)-3-(4-(((3R,5R,7R)-adamantan-1-yl)thio)-3-methoxyphenyl)acrylate (3vb):**

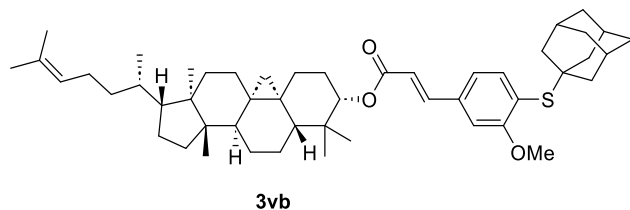

side components:

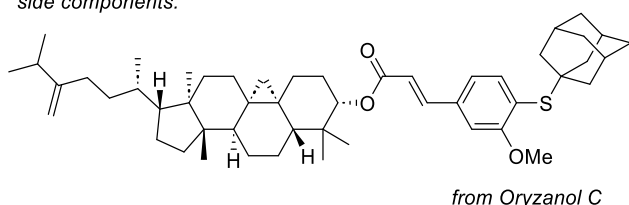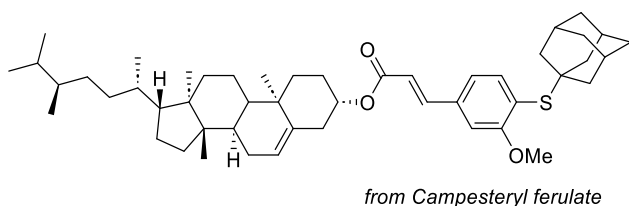

$C_{50}H_{72}O_3S$  (753.18 g/mol)

Following **GP-B**, **3vb** was synthesized using  $\gamma$ -Oryzanol trifluoromethanesulfonate (**1v**) (360 mg, 500  $\mu$ mol, 1.0 equiv.;  $\gamma$ -Oryzanol was purchased from TCI and the mixture contained Oryzanol A, Oryzanol C and Campesteryl ferulate as main components)<sup>16</sup> and 1-adamantane thiol (**2b**) (88.4 mg, 525  $\mu$ mol, 1.05 equiv.). Purification by flash chromatography (SiO<sub>2</sub>, gradient *n*-hexane/EtOAc 100:0 to 85:15 over 10 CV) afforded **3vb** (328 mg, 436  $\mu$ mol, 87%; mixture according to starting material) as colorless solid.

**R<sub>f</sub>**: 0.33 (*n*-hexane/EtOAc 95:5).

**m. p.**: 157.3 – 159.1 °C.

**<sup>1</sup>H-NMR** (400 MHz, CDCl<sub>3</sub>,  $\delta$ ): 7.64 (d, *J* = 16.0 Hz, 1H), 7.48 (d, *J* = 7.8 Hz, 1H), 7.11 – 7.00 (m, 2H), 6.52 – 6.39 (m, 1H), 4.81 – 4.61 (m, 2H), 3.89 (s, 3H), 2.45 – 2.16 (m, 1H), 2.03 – 1.95 (m, 4H), 1.94 – 1.79 (m, 9H), 1.70 – 1.50 (m, 16H), 1.48 – 1.25 (m, 8H), 1.19 – 1.08 (m, 3H), 1.06 – 1.01 (m, 4H), 1.00 – 0.95 (m, 5H), 0.95 – 0.76 (m, 12H).

**<sup>13</sup>C-NMR** (101 MHz, CDCl<sub>3</sub>,  $\delta$ ): 166.7, 161.7, 157.0, 143.8, 140.7, 137.0, 125.4, 121.7, 120.3, 119.9, 110.0, 106.1, 81.0, 56.0, 52.4, 49.9, 49.0, 48.0, 47.4, 45.4, 43.8, 39.9, 36.3, 35.7, 34.0, 33.0, 31.8, 31.5, 30.3, 29.9, 28.3, 27.1, 26.7, 26.1, 26.0, 25.6, 22.2, 22.0, 21.1, 20.3, 19.5, 18.5, 18.1, 15.5.

**HR-MS** (ESI): *m/z* calc for [M+Na]<sup>+</sup> 775.50944, found 775.50900.

For the thioether corresponding to Oryzanol C:  $m/z$  calc for  $[M+Na]^+$  789.52509, found 789.52471.

For the thioether corresponding to Campesteryl ferulate:  $m/z$  calc for  $[M+Na]^+$  749.49379, found 749.49305.

IR (ATR,  $\bar{\nu}$  [ $\text{cm}^{-1}$ ]): 2902 (m), 2859 (w), 1709 (m), 1634 (w), 1589 (w), 1552 (w), 1456 (w), 1400 (w), 1374 (w), 1305 (m), 1239 (m), 1161 (s), 1098 (w), 1068 (w), 1034 (m), 978 (m), 930 (w), 885 (w), 841 (w), 818 (m), 713 (w), 675 (w).

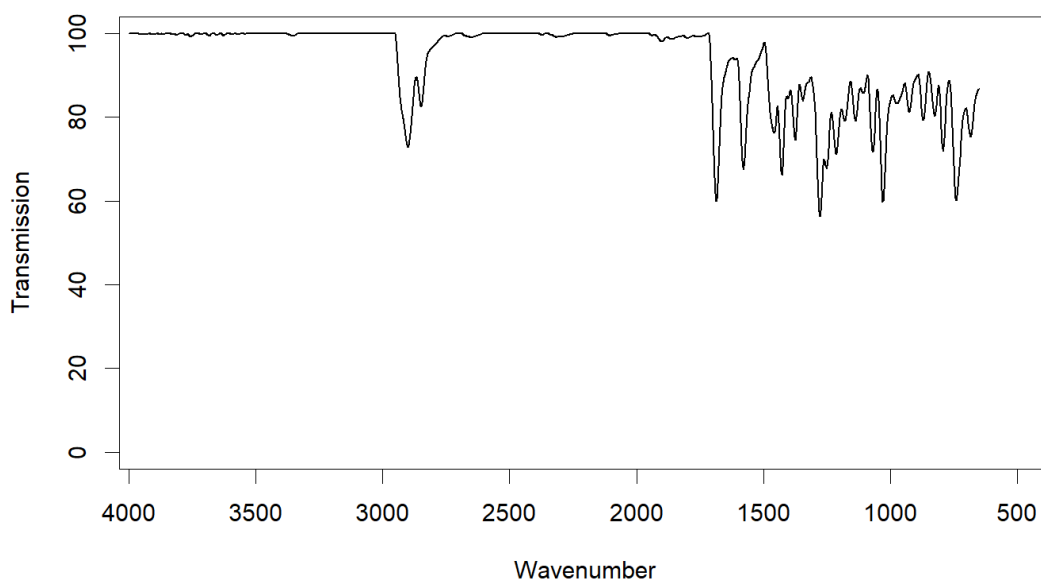

**Figure S140.** IR-spectrum (ATR, neat) of **3vb**.

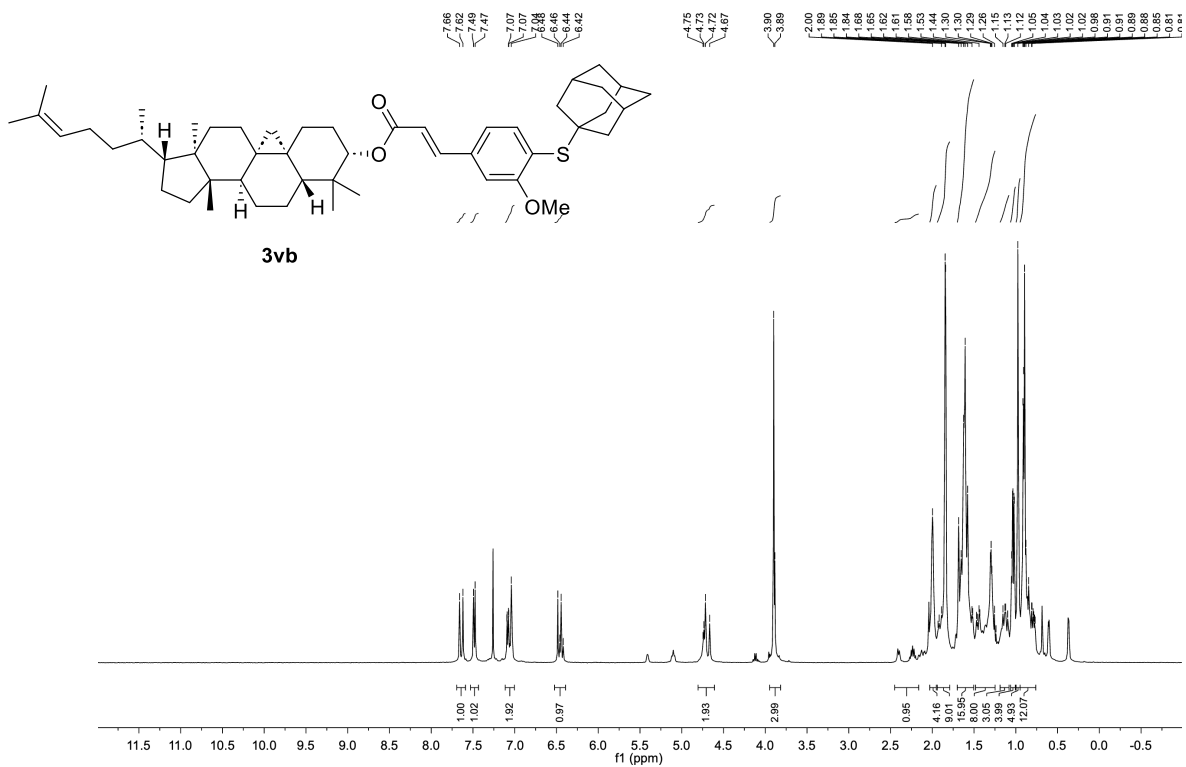

Figure S141.  $^1\text{H-NMR}$ -spectrum (400 MHz,  $\text{CDCl}_3$ ) of **3vb**.

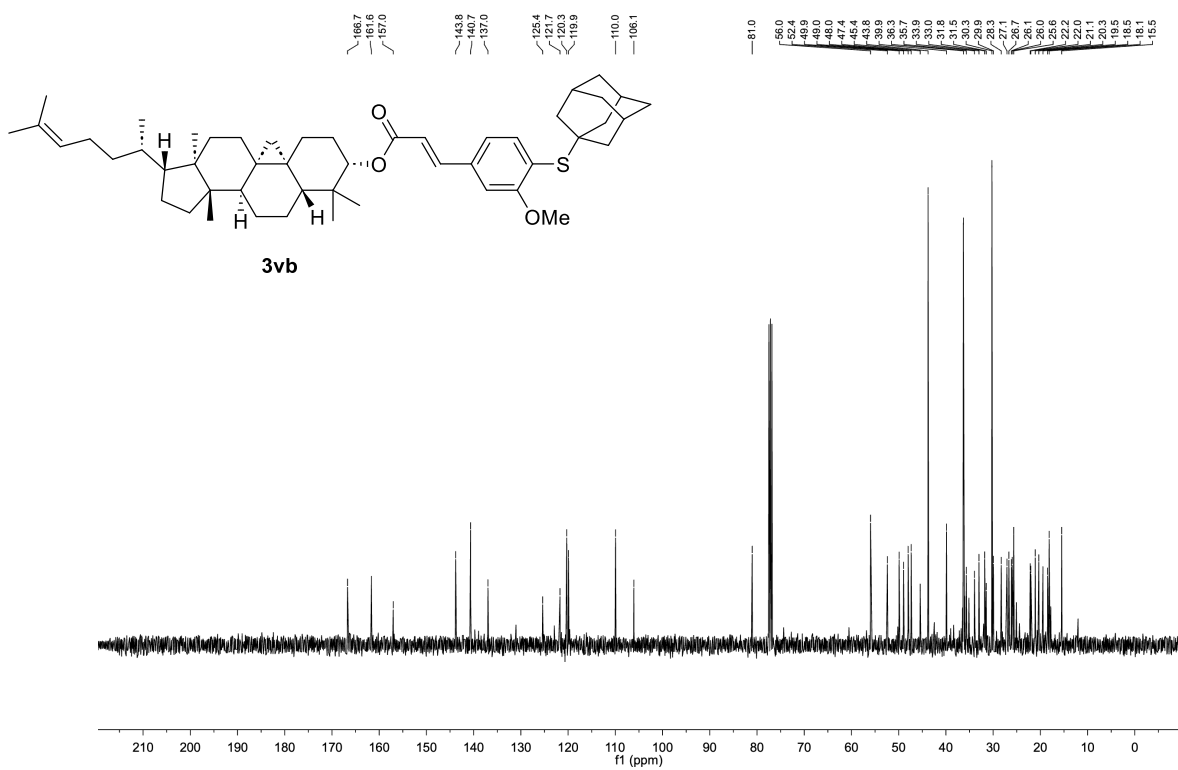

Figure S142.  $^{13}\text{C-NMR}$ -spectrum (101 MHz,  $\text{CDCl}_3$ ) of **3vb**.



**Methyl 4-(((1*s*,3*s*)-adamantan-1-yl)thio)-2',4'-difluoro-[1,1'-biphenyl]-3-carboxylate (**3wb**):**

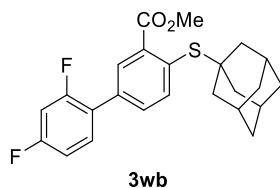

C<sub>24</sub>H<sub>24</sub>F<sub>2</sub>O<sub>2</sub>S (414.51 g/mol)

Following **GP-C**, **3wb** was synthesized using methyl 2',4'-difluoro-4-(((trifluoromethyl)sulfonyl)oxy)-[1,1'-biphenyl]-3-carboxylate (**1w**) (198 mg, 500 μmol, 1.0 equiv.) and 1-adamantane thiol (**2b**) (88.4 mg, 525 μmol, 1.05 equiv.). The reaction time was prolonged to 6 h. Purification by flash chromatography (SiO<sub>2</sub>, gradient *n*-hexane/EtOAc 100:0 to 90:10 over 10 CV) afforded a mixture of starting material and product. This mixture was dissolved in THF (10 ml) and an aqueous solution of NBu<sub>4</sub>OH (324 mg, 40% w/w, 1 equiv.) was added and stirred for 16 h. The solution was dried over MgSO<sub>4</sub>, filtered and the solvent was removed under reduced pressure. The resulting oil was purified by flash chromatography (SiO<sub>2</sub>, gradient *n*-hexane/EtOAc 100:0 to 90:10 over 10 CV) to give **3wb** (138 mg, 333 μmol, 67%) as colorless sticky oil.

**R<sub>f</sub>**: 0.58 (*n*-hexane/EtOAc 90:10).

**<sup>1</sup>H-NMR** (400 MHz, CDCl<sub>3</sub>, δ): 7.72 – 7.68 (m, 1H), 7.65 (d, *J* = 8.1 Hz, 1H), 7.54 (dt, *J* = 8.1, 1.9 Hz, 1H), 7.47 – 7.39 (m, 1H), 7.00 – 6.89 (m, 2H), 3.93 (s, 3H), 2.07 – 1.97 (m, 3H), 1.90 – 1.78 (m, 6H), 1.68 – 1.56 (m, 6H).

**<sup>13</sup>C-NMR** (101 MHz, CDCl<sub>3</sub>, δ): 168.9, 162.8 (dd, *J* = 250.3, 11.8 Hz), 159.9 (dd, *J* = 251.8, 11.7 Hz), 140.0, 139.3, 135.3, 131.5 (dd, *J* = 9.6, 4.5 Hz), 130.3 (d, *J* = 3.3 Hz), 129.3, 128.9 (d, *J* = 3.1 Hz), 123.8 (m), 112.0 (dd, *J* = 21.2, 3.9 Hz), 104.7 (dd, *J* = 25.9, 25.9 Hz), 52.5, 50.0, 43.9, 36.2, 30.3.

**<sup>19</sup>F-NMR** (376 MHz, CDCl<sub>3</sub>, δ): -110.0 (m), -112.9 (m).

**HR-MS** (ESI): *m/z* calc for [M+Na]<sup>+</sup> 437.13573, found 437.13642.

**IR** (ATR,  $\tilde{\nu}$  [cm<sup>-1</sup>]): 2902 (m), 2849 (w), 1729 (s), 1612 (w), 1597 (w), 1504 (m), 1459 (m), 1433 (m), 1385 (w), 1344 (w), 1307 (m), 1265 (s), 1221 (s), 1133 (m), 1102 (s), 1053 (m), 1034 (m), 967 (s), 904 (w), 848 (s), 811 (s), 774 (m), 732 (m), 675 (w).

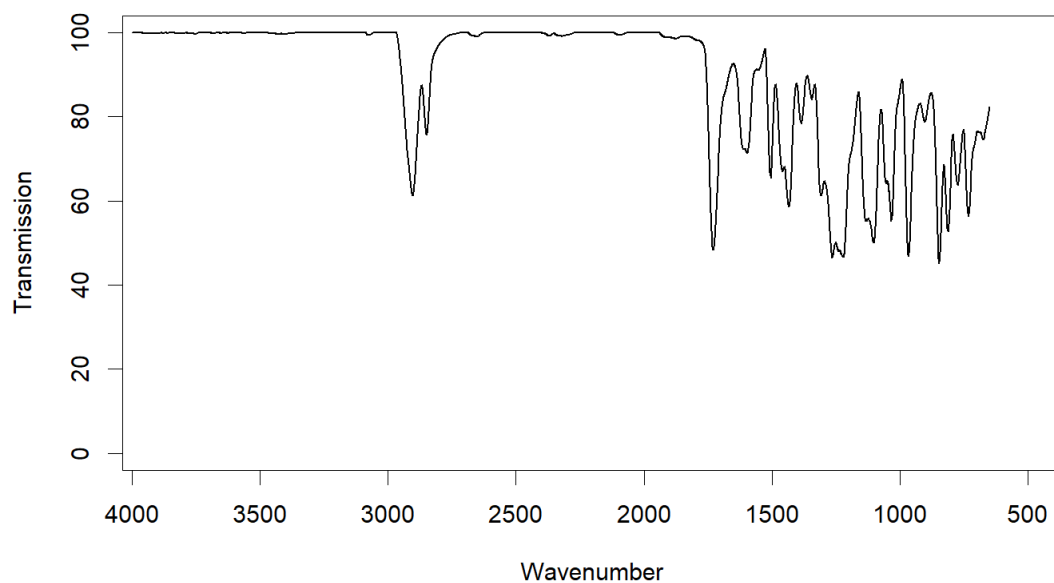

Figure S143. IR-spectrum (ATR, neat) of **3wb**.

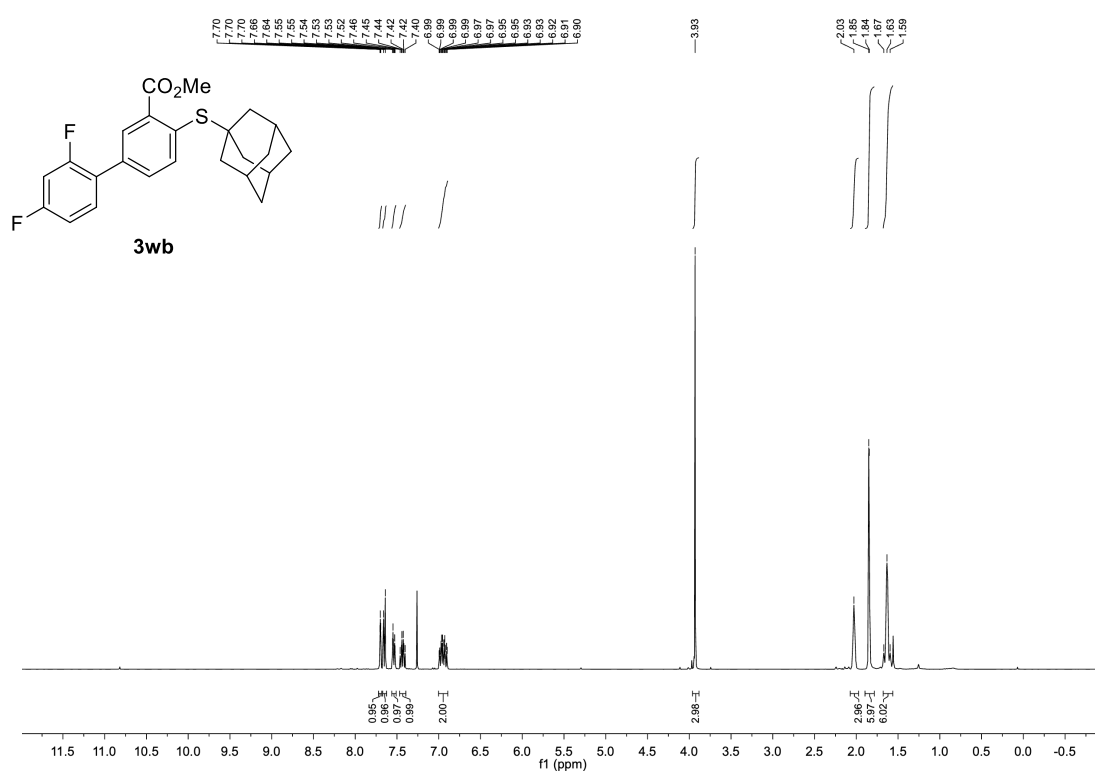

Figure S144.  $^1\text{H-NMR}$ -spectrum (400 MHz,  $\text{CDCl}_3$ ) of **3wb**.

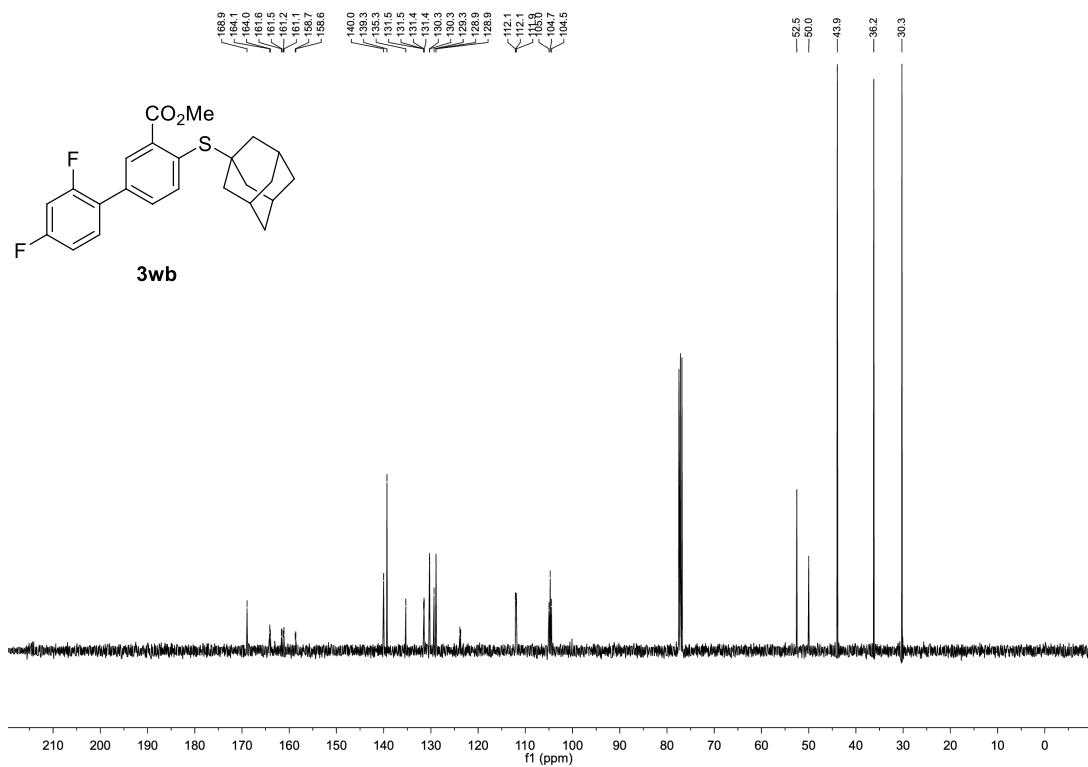

Figure S145. <sup>13</sup>C-NMR-spectrum (101 MHz, CDCl<sub>3</sub>) of **3wb**.

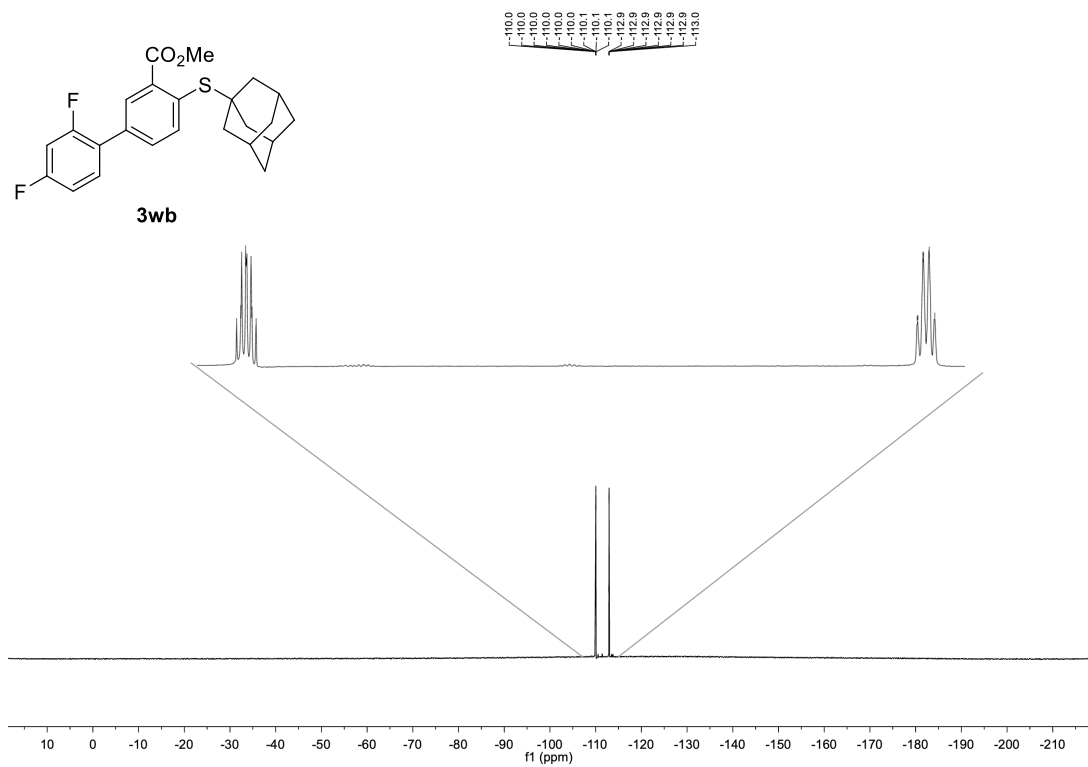

Figure S146. <sup>19</sup>F-NMR-spectrum (376 MHz, CDCl<sub>3</sub>) of **3wb**.

**Ethyl 2-(4-(((1*s*,3*s*)-adamantan-1-yl)thio)-3-formylphenyl)-4-methylthiazole-5-carboxylate (**3xb**):**

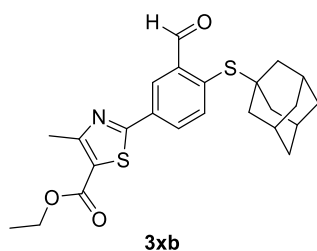

$C_{24}H_{27}NO_3S_2$  (441.60 g/mol)

Following **GP-C**, **3xb** was synthesized using ethyl 2-(3-formyl-4-(((trifluoromethyl)sulfonyl)oxy)phenyl)-4-methylthiazole-5-carboxylate (**1x**) (423 mg, 1.00 mmol, 1.0 equiv.) and 1-adamantane thiol (**2b**) (177 mg, 1.05 mmol, 1.05 equiv.). Purification by flash chromatography ( $SiO_2$ , gradient *n*-hexane/EtOAc 100:0 to 90:10 over 10 CV) afforded **3xb** (250 mg, 566  $\mu$ mol, 57%) as colorless solid.

**R<sub>f</sub>**: 0.56 (*n*-hexane/EtOAc 90:10).

**m.p.**: 155.1 – 156.1 °C.

**<sup>1</sup>H-NMR** (400 MHz,  $CDCl_3$ ,  $\delta$ ): 10.81 (s, 1H), 8.47 (d, *J* = 2.2 Hz, 1H), 8.19 (dd, *J* = 8.0, 2.2 Hz, 1H), 7.68 (d, *J* = 8.0 Hz, 1H), 4.36 (q, *J* = 7.1 Hz, 2H), 2.79 (s, 3H), 2.06 – 1.99 (m, 3H), 1.86 – 1.78 (m, 6H), 1.68 – 1.54 (m, 6H), 1.39 (t, *J* = 7.1 Hz, 3H).

**<sup>13</sup>C-NMR** (101 MHz,  $CDCl_3$ ,  $\delta$ ): 192.9, 167.8, 162.2, 161.4, 141.0, 140.3, 137.6, 134.1, 130.7, 126.3, 123.1, 61.6, 50.9, 43.9, 36.1, 30.2, 17.6, 14.5.

**HR-MS** (ESI): *m/z* calc for  $[M+Na]^+$  464.13246, found 464.13258.

**IR** (ATR,  $\tilde{\nu}$  [ $cm^{-1}$ ]): 2908 (w), 2850 (w), 1705 (m), 1683 (m), 1589 (w), 1515 (w), 1470 (w), 1437 (w), 1363 (m), 1314 (w), 1251 (s), 1169 (w), 1090 (s), 1030 (m), 1012 (m), 982 (w), 969 (w), 889 (w), 856 (m), 818 (w), 758 (m), 729 (m), 684 (w).

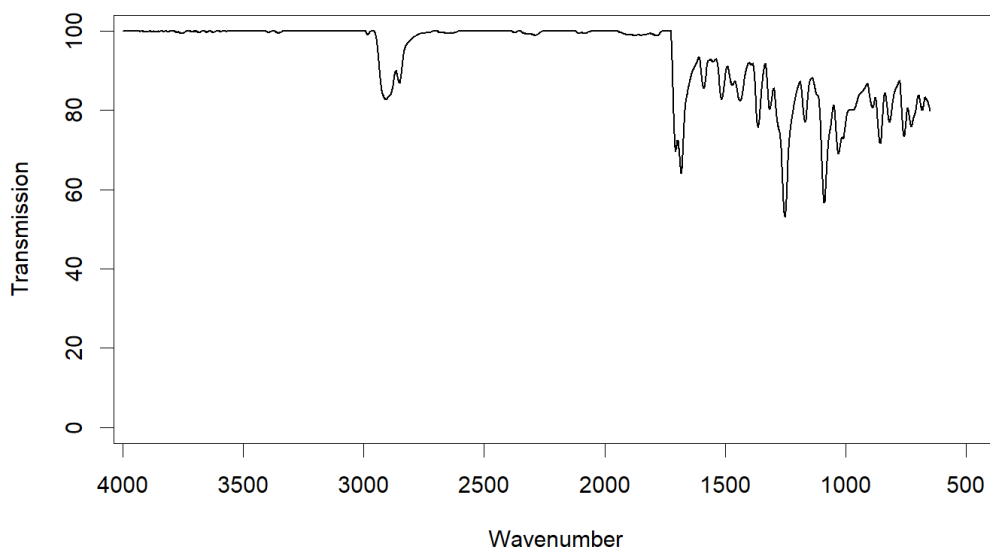

**Figure S147.** IR-spectrum (ATR, neat) of **3xb**.

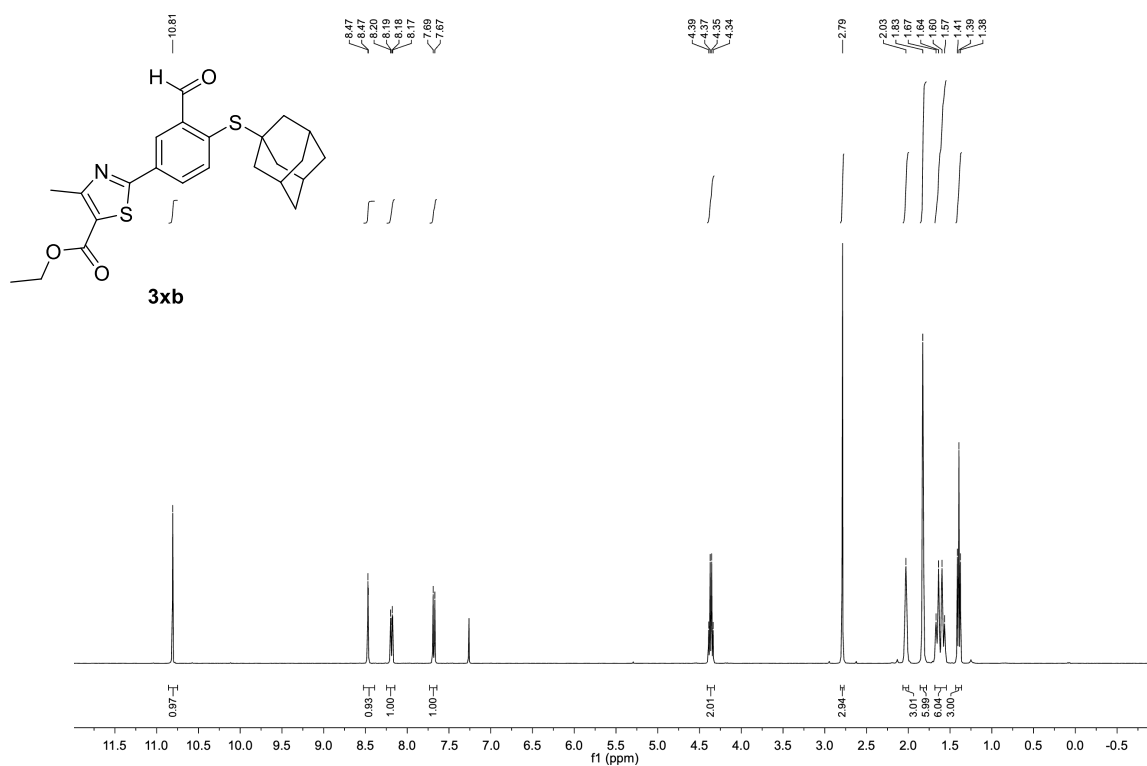

**Figure S148.**  $^1\text{H-NMR}$ -spectrum (400 MHz,  $\text{CDCl}_3$ ) of **3xb**.

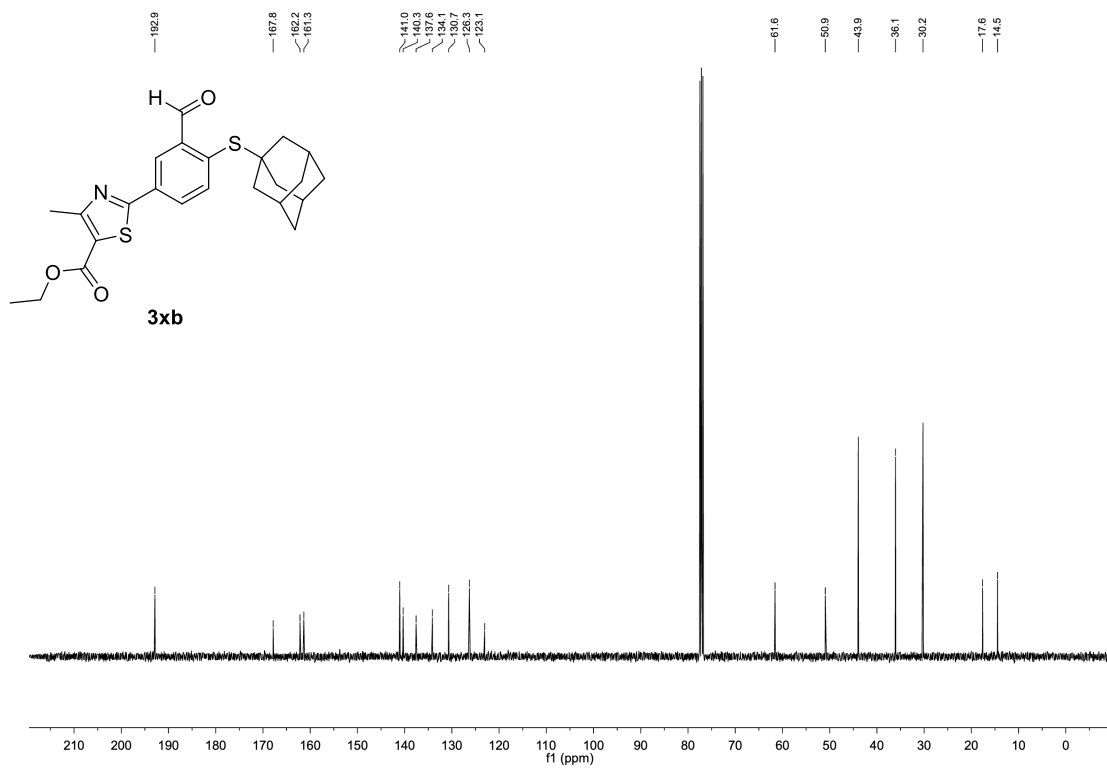

Figure S149.  $^{13}\text{C}$ -NMR-spectrum (101 MHz,  $\text{CDCl}_3$ ) of **3xb**.

**((3s,5s,7s)-Adamantan-1-yl)(pyren-1-yl)sulfane (3yb):**

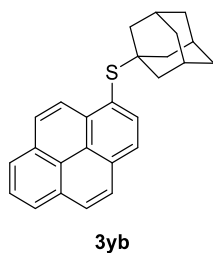

$C_{26}H_{24}S$  (368.54 g/mol)

Following **GP-B**, **3yb** was synthesized using pyren-1-yl trifluoromethanesulfonate (**1y**) (350 mg, 1.00 mmol, 1.0 equiv.) and 1-adamantane thiol (**2b**) (177 mg, 1.05 mmol, 1.05 equiv.). Purification by flash chromatography ( $SiO_2$ , gradient *n*-hexane/EtOAc 100:0 to 90:10 over 10 CV) afforded **3yb** (208 mg, 564  $\mu$ mol, 56%) as pale yellow solid.

**R<sub>f</sub>**: 0.72 (*n*-hexane/EtOAc 95:5).

**m. p.**: 140.7 – 143.5 °C.

**<sup>1</sup>H-NMR** (400 MHz,  $CDCl_3$ ,  $\delta$ ): 9.06 (d,  $J = 8.9$  Hz, 1H), 8.27 – 8.03 (m, 8H), 2.02 – 1.90 (m, 9H), 1.64 – 1.54 (m, 6H).

**<sup>13</sup>C-NMR** (101 MHz,  $CDCl_3$ ,  $\delta$ ): 137.0, 135.8, 132.0, 131.2, 131.0, 128.3, 127.7, 127.3, 127.0, 126.13, 126.08, 125.44, 125.40, 125.2, 124.4, 124.1, 50.4, 44.0, 36.2, 30.1.

**HR-MS** (APCI):  $m/z$  calc for  $[M+H]^+$  369.16715, found 369.16725.

**IR** (ATR,  $\bar{\nu}$  [ $cm^{-1}$ ]): 3040 (w), 2898 (m), 2845 (w), 1895 (w), 1773 (w), 1746 (w), 1661 (w), 1630 (w), 1587 (w), 1482 (w), 1448 (w), 1422 (m), 1340 (w), 1292 (w), 1243 (w), 1212 (m), 1183 (w), 1138 (w), 1094 (w), 1035 (w), 967 (w), 907 (w), 833 (s), 743 (w), 707 (m), 677 (m).

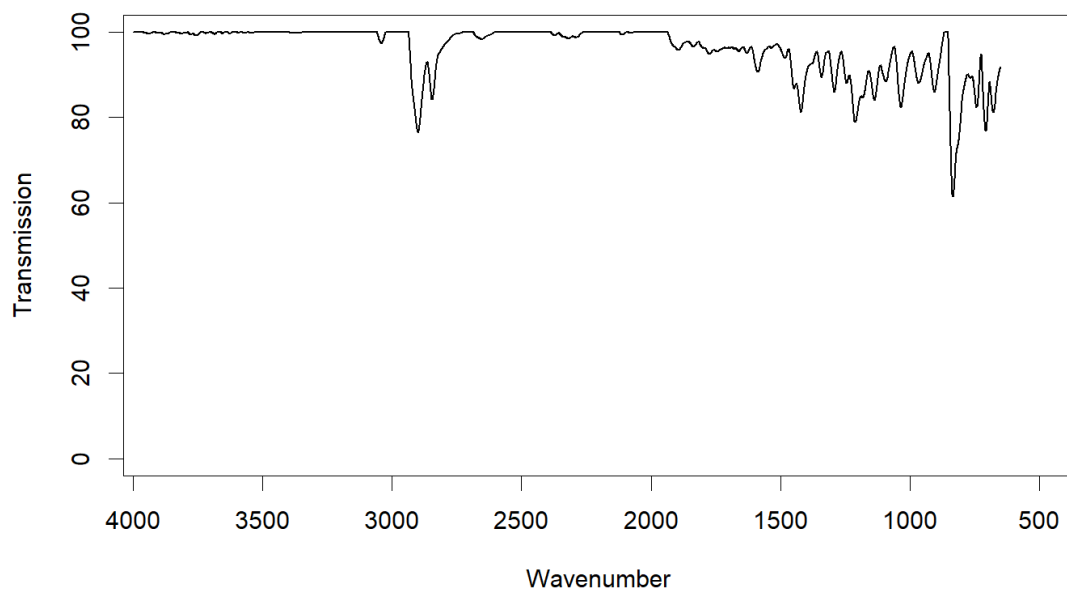

**Figure S150.** IR-spectrum (ATR, neat) of **3yb**.

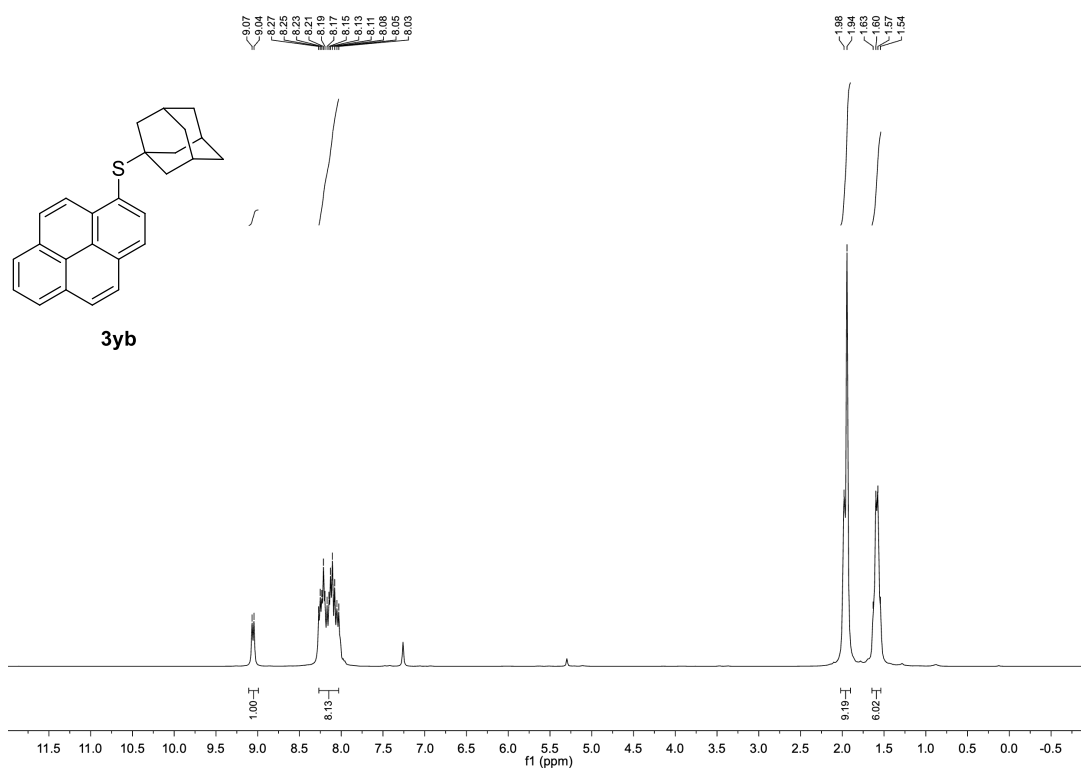

**Figure S151.**  $^1\text{H-NMR}$ -spectrum (400 MHz,  $\text{CDCl}_3$ ) of **3yb**.



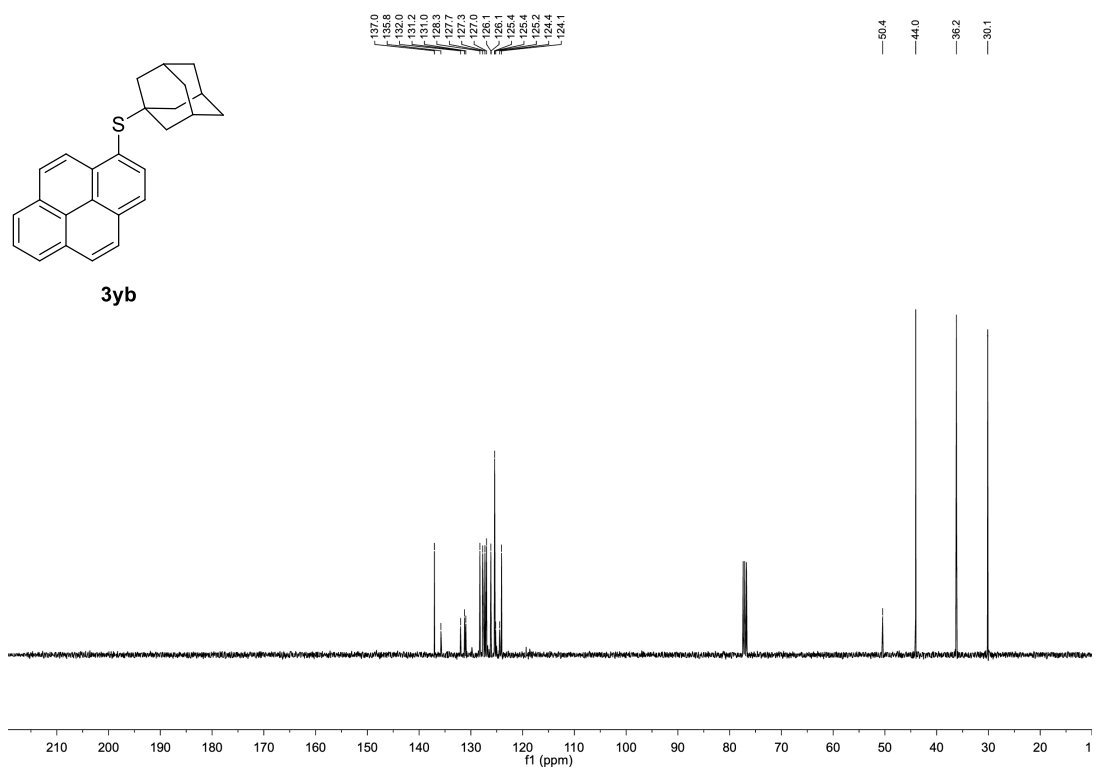

Figure S152. <sup>13</sup>C-NMR-spectrum (101 MHz, CDCl<sub>3</sub>) of **3yb**.

**(2-Methyl-1,3-phenylene)bis(((1*S*,3*S*)-adamantan-1-yl)sulfane) (**3zbb**):**

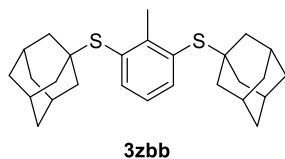

C<sub>27</sub>H<sub>36</sub>S<sub>2</sub> (424.71 g/mol)

**3zbb** was isolated from an intramolecular competition experiment (described above), using 3-bromo-2-methylphenyl trifluoromethanesulfonate (**1z**) (319 mg, 1.00 mmol, 1.0 equiv.) and 1-adamantane thiol (**2b**) (177 mg, 1.05 mmol, 1.05 equiv.). Purification by flash chromatography (SiO<sub>2</sub>, gradient *n*-hexane/EtOAc 100:0 to 95:5 over 10 CV) afforded **3zbb** (154 mg, 363 μmol, 36%) as colorless solid.

**R<sub>f</sub>**: 0.13 (*n*-hexane).

**m. p.**: 258.0 – 259.1 °C.

**<sup>1</sup>H-NMR** (400 MHz, CDCl<sub>3</sub>, δ): 7.52 (d, *J* = 7.6 Hz, 2H), 7.06 (dd, *J* = 7.6, 7.6 Hz, 1H), 2.77 (s, 3H), 2.03 – 1.96 (m, 6H), 1.86 – 1.81 (m, 12H), 1.69 – 1.57 (m, 12H).

**<sup>13</sup>C-NMR** (101 MHz, CDCl<sub>3</sub>, δ): 150.4, 140.2, 131.6, 124.6, 50.0, 43.9, 36.3, 30.2, 22.3.

**HR-MS** (APCI): *m/z* calc for [M+H]<sup>+</sup> 425.23312, found 425.23351.

**IR** (ATR,  $\bar{\nu}$  [cm<sup>-1</sup>]): 2898 (m), 2846 (m), 1444 (m), 1411 (w), 1370 (w), 1340 (w), 1292 (m), 1254 (w), 1098 (w), 1034 (m), 981 (w), 819 (w), 792 (m), 762 (w), 713 (w), 680 (w).

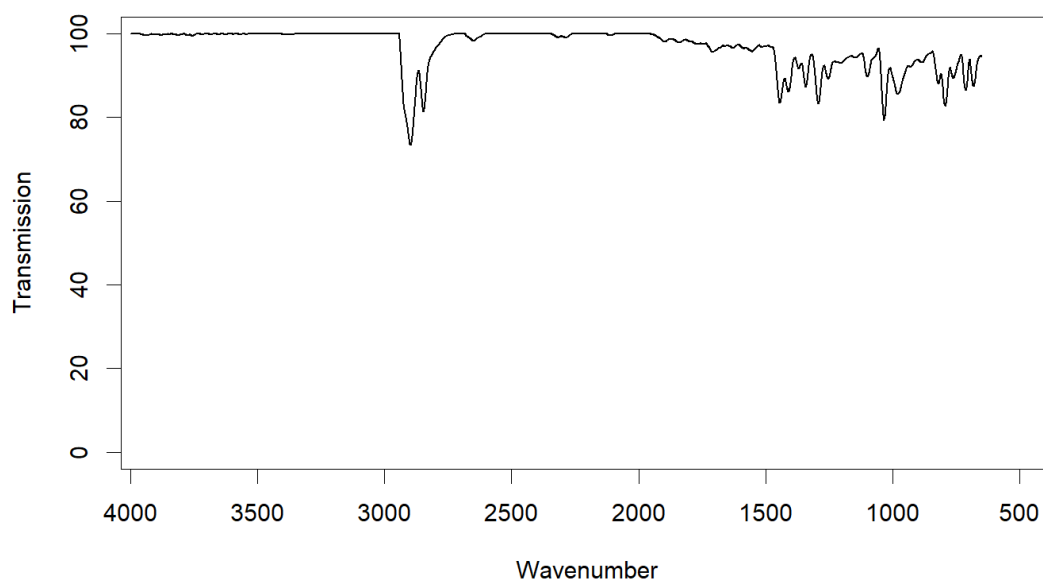

**Figure S153.** IR-spectrum (ATR, neat) of **3zbb**.

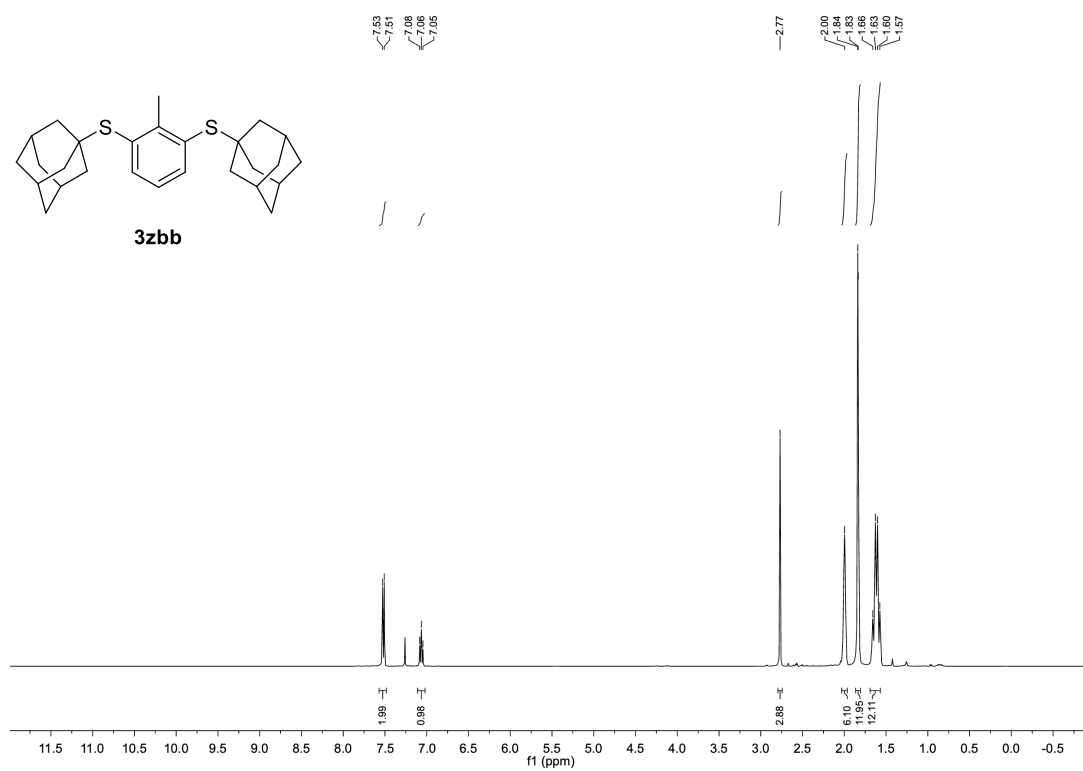

Figure S154. <sup>1</sup>H-NMR-spectrum (400 MHz, CDCl<sub>3</sub>) of **3zbb**.

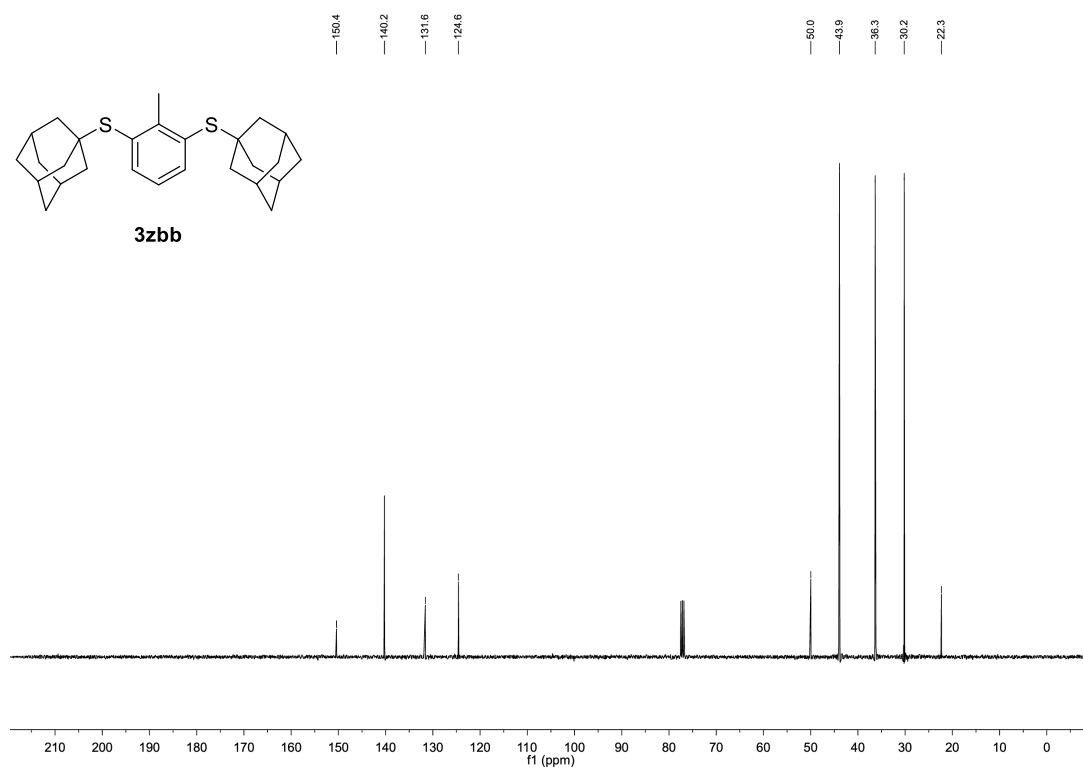

Figure S155. <sup>13</sup>C-NMR-spectrum (101 MHz, CDCl<sub>3</sub>) of **3zbb**.

**(((1*s*,3*s*)-Adamantan-1-yl)(3-chloro-2-methylphenyl)sulfane (3Ab):**

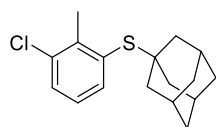

**3Ab**

C<sub>17</sub>H<sub>21</sub>ClS (292.87 g/mol)

**3Ab** was isolated from an intramolecular competition experiment (described above), using 3-chloro-2-methylphenyl trifluoromethanesulfonate (**1A**) (275 mg, 1.00 mmol, 1.0 equiv.) and 1-adamantane thiol (**2b**) (177 mg, 1.05 mmol, 1.05 equiv.). Purification by flash chromatography (SiO<sub>2</sub>, gradient *n*-hexane/EtOAc 100:0 to 95:5 over 10 CV) afforded **3Ab** (164 mg, 560 μmol, 56%) as colorless solid.

**R<sub>f</sub>**: 0.50 (*n*-hexane).

**m. p.**: 110.3 – 111.7 °C.

**<sup>1</sup>H-NMR** (400 MHz, CDCl<sub>3</sub>, δ): 7.44 (d, *J* = 7.7 Hz, 1H), 7.36 (d, *J* = 7.9 Hz, 1H), 7.06 (dd, *J* = 7.7, 7.9 Hz, 1H), 2.63 (s, 3H), 2.04 – 1.98 (m, 3H), 1.85 – 1.81 (m, 6H), 1.67 – 1.56 (m, 6H).

**<sup>13</sup>C-NMR** (101 MHz, CDCl<sub>3</sub>, δ): 142.3, 138.0, 138.0, 135.4, 132.5, 130.1, 130.1, 125.9, 50.1, 43.8, 36.3, 30.2, 20.0.

**HR-MS** (APCI): *m/z* calc for [M]<sup>+</sup> 292.10470, found 292.10419.

**IR** (ATR,  $\bar{\nu}$  [cm<sup>-1</sup>]): 2907 (m), 2846 (m), 1552 (w), 1448 (w), 1422 (m), 1370 (w), 1340 (w), 1296 (w), 1254 (w), 1202 (w), 1176 (w), 1150 (w), 1105 (w), 1079 (w), 1034 (m), 987 (m), 817 (w), 771 (m), 703 (m), 684 (w).

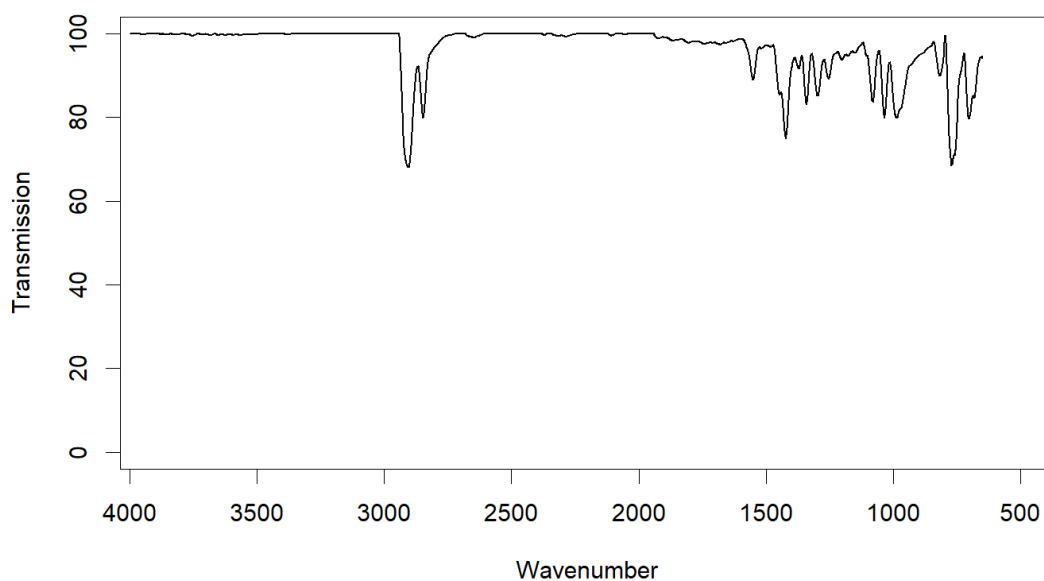

**Figure S156.** IR-spectrum (ATR, neat) of **3Ab**.

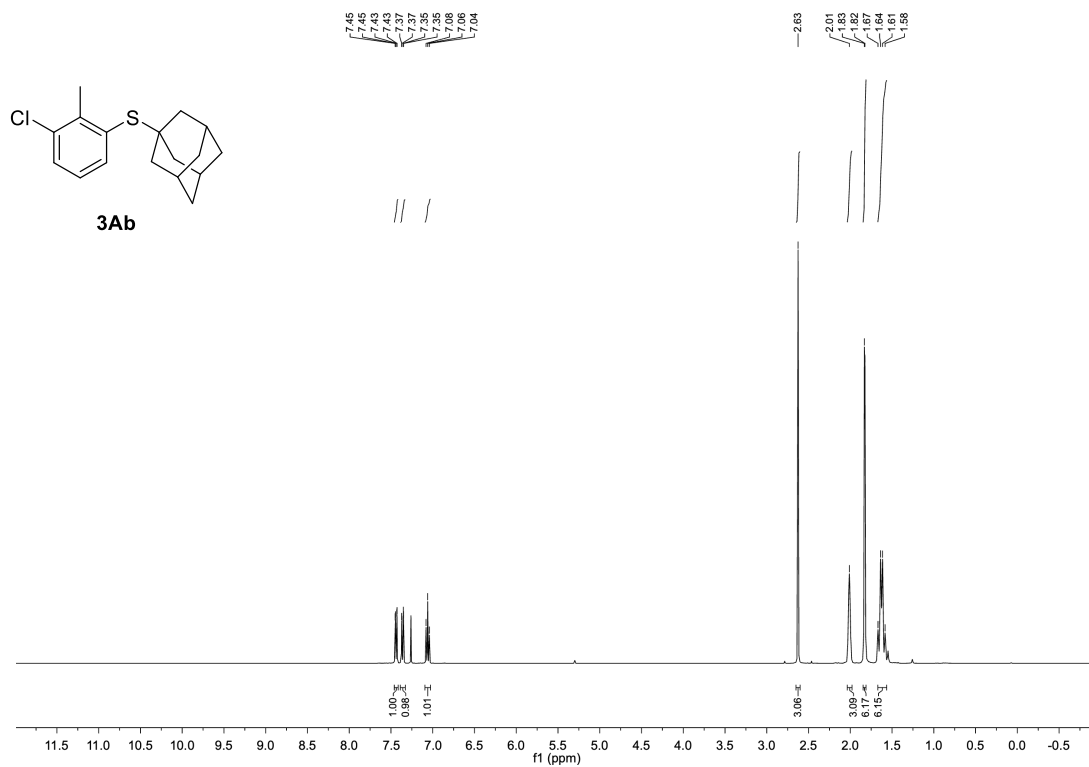

Figure S157. <sup>1</sup>H-NMR-spectrum (400 MHz, CDCl<sub>3</sub>) of **3Ab**.

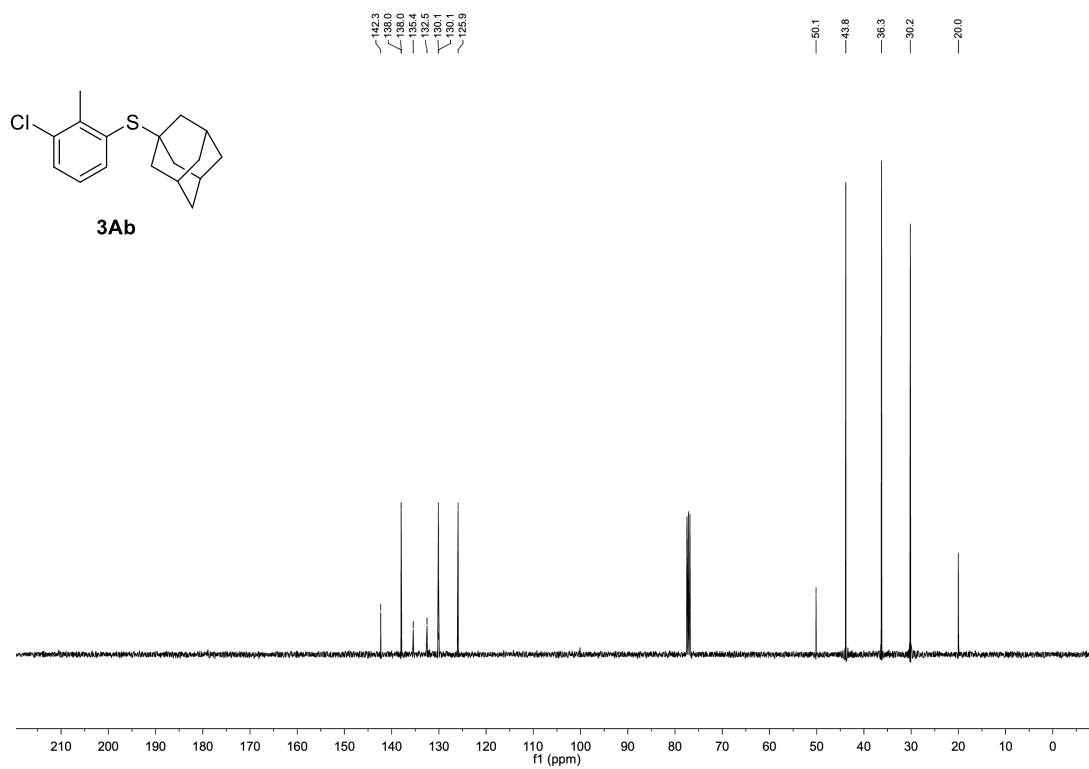

Figure S158. <sup>13</sup>C-NMR-spectrum (101 MHz, CDCl<sub>3</sub>) of **3Ab**.

**[1,1'-Biphenyl]-2-yl(tetradecyl)sulfane (3ac):**

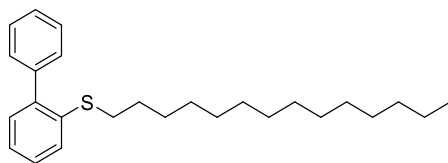

**3ac**

C<sub>26</sub>H<sub>38</sub>S (382.65 g/mol)

Following **GP-B**, **3ac** was synthesized using [1,1'-biphenyl]-2-yl trifluoromethanesulfonate (**1a**) (302 mg, 1.00 mmol, 1.0 equiv.) and *n*-tetradecane thiol (**2c**) (242 mg, 1.05 mmol, 1.05 equiv.). Purification by flash chromatography (SiO<sub>2</sub>, gradient *n*-hexane/EtOAc 100:0 to 95:5 over 10 CV) afforded **3ac** (298 mg, 779 μmol, 78%) as off-white solid.

**R<sub>f</sub>**: 0.26 (*n*-hexane).

**m.p.**: 39.2 – 40.1 °C.

**<sup>1</sup>H-NMR** (400 MHz, CDCl<sub>3</sub>, δ): 7.46 – 7.36 (m, 6H), 7.33 – 7.19 (m, 3H), 2.76 (t, *J* = 7.4 Hz, 2H), 1.61 – 1.52 (m, 2H), 1.32 – 1.19 (m, 22H), 0.90 (t, *J* = 6.5 Hz, 3H).

**<sup>13</sup>C-NMR** (101 MHz, CDCl<sub>3</sub>, δ): 142.2, 141.0, 136.0, 130.4, 129.5, 128.1, 127.9, 127.8, 127.5, 125.4, 33.4, 32.1, 29.84, 29.81, 29.7, 29.6, 29.5, 29.3, 29.1, 28.9, 22.9, 14.3.

**HR-MS** (APCI): *m/z* calc for [M+H]<sup>+</sup> 383.27670, found 383.27708.

**IR** (ATR,  $\tilde{\nu}$  [cm<sup>-1</sup>]): 3054 (w), 2958 (w), 2913 (s), 2842 (s), 1895 (w), 1582 (w), 1493 (w), 1459 (s), 1373 (w), 1273 (w), 1238 (w), 1180 (w), 1124 (w), 1075 (w), 1038 (w), 1001 (w), 911 (w), 859 (w), 740 (s), 691 (s).

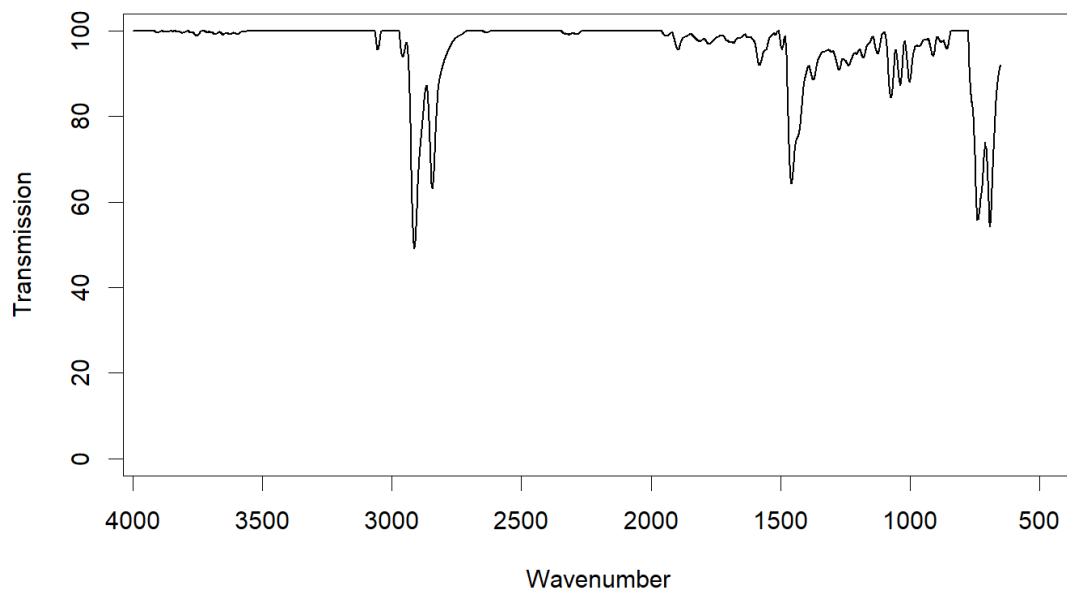

Figure S159. IR-spectrum (ATR, neat) of **3ac**.

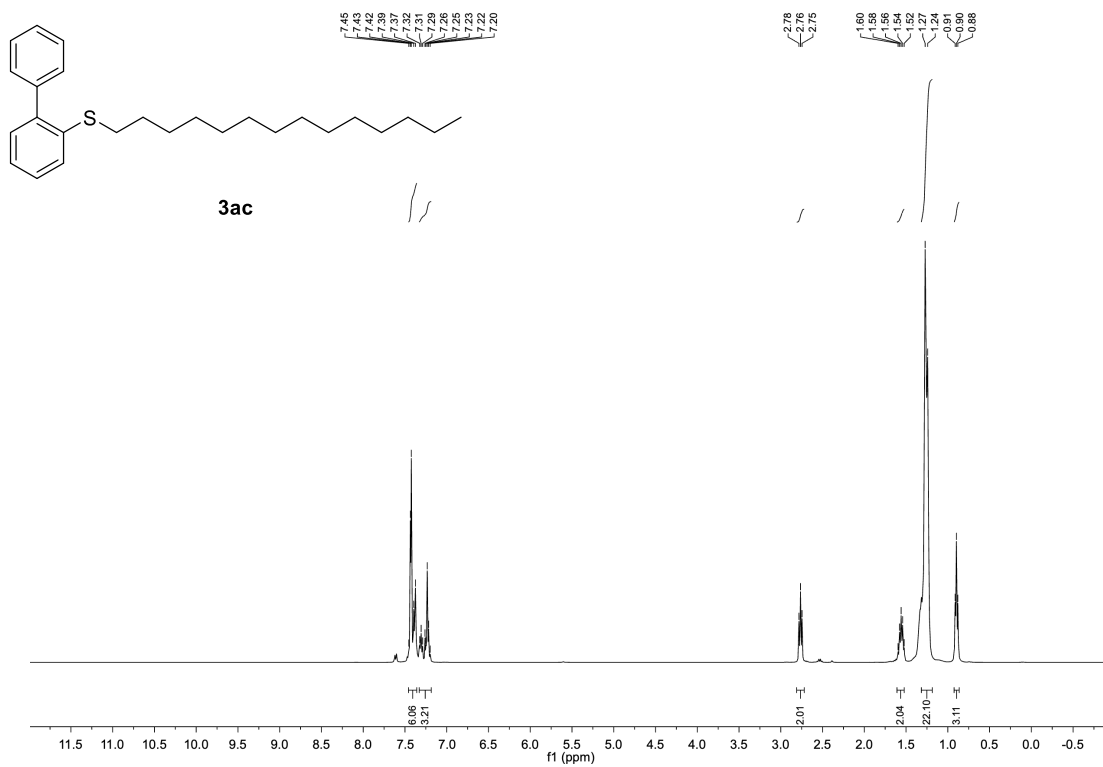

Figure S160.  $^1\text{H}$ -NMR-spectrum (400 MHz,  $\text{CDCl}_3$ ) of **3ac**.

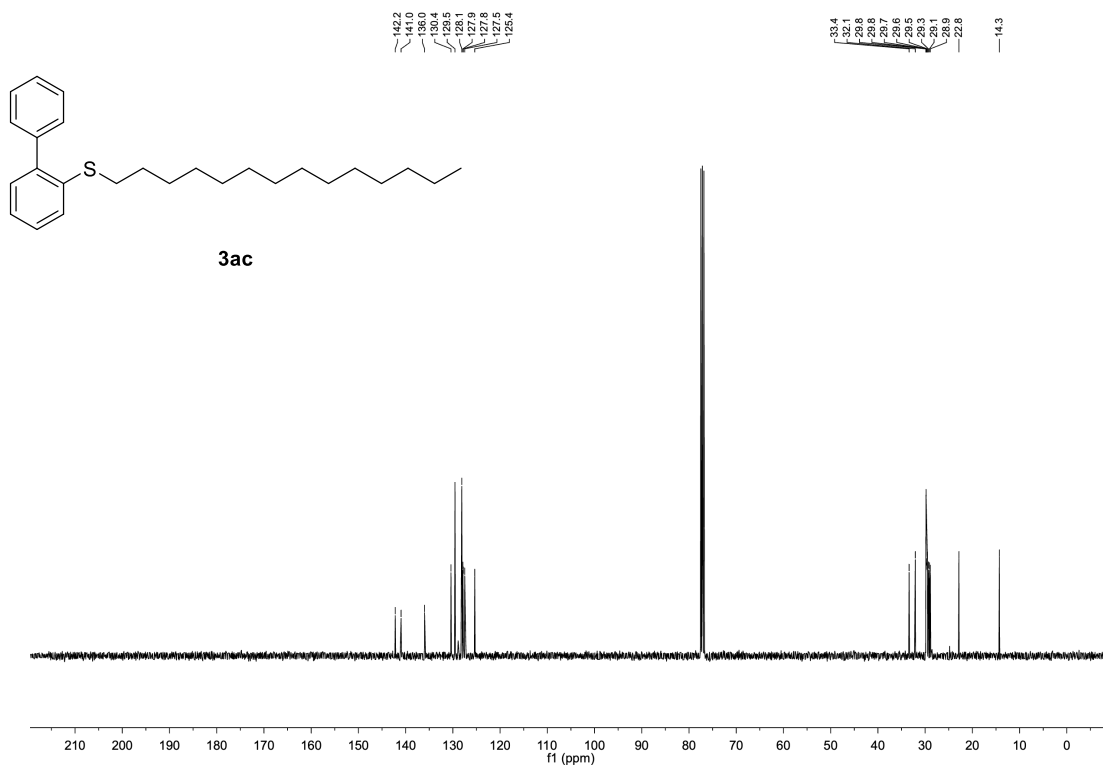

Figure S161. <sup>13</sup>C-NMR-spectrum (101 MHz, CDCl<sub>3</sub>) of 3ac.



**[1,1'-Biphenyl]-2-yl(cyclohexyl)sulfane (3ad):**

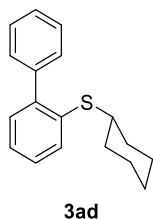

$C_{18}H_{20}S$  (268.42 g/mol)

Following **GP-B**, **3ad** was synthesized using [1,1'-biphenyl]-2-yl trifluoromethanesulfonate (**1a**) (302 mg, 1.00 mmol, 1.0 equiv.) and cyclohexane thiol (**2d**) (122 mg, 1.05 mmol, 1.05 equiv.). Purification by flash chromatography ( $SiO_2$ , gradient *n*-hexane/EtOAc 100:0 to 95:5 over 10 CV) afforded **3ad** (223 mg, 831  $\mu$ mol, 83%) as colorless oil.

**R<sub>f</sub>**: 0.19 (*n*-hexane).

**<sup>1</sup>H-NMR** (400 MHz,  $CDCl_3$ ,  $\delta$ ): 7.47 – 7.43 (m, 1H), 7.41 – 7.30 (m, 5H), 7.29 – 7.19 (m, 3H), 2.95 – 2.81 (m, 1H), 1.87 – 1.77 (m, 2H), 1.71 – 1.60 (m, 2H), 1.57 – 1.47 (m, 1H), 1.27 – 1.10 (m, 5H).

**<sup>13</sup>C-NMR** (101 MHz,  $CDCl_3$ ,  $\delta$ ): 143.7, 141.3, 134.4, 130.9, 130.6, 129.7, 128.0, 127.7, 127.3, 126.2, 46.0, 33.2, 26.2, 25.9.

**HR-MS** (APCI):  $m/z$  calc for  $[M+H]^+$  269.13585, found 269.13616.

**IR** (ATR,  $\bar{\nu}$  [ $cm^{-1}$ ]): 3051 (w), 3024 (w), 2924 (s), 2849 (m), 1582 (w), 1450 (s), 1336 (w), 1261 (w), 1202 (w), 1072 (w), 1038 (w), 998 (m), 885 (w), 743 (s), 695 (s).

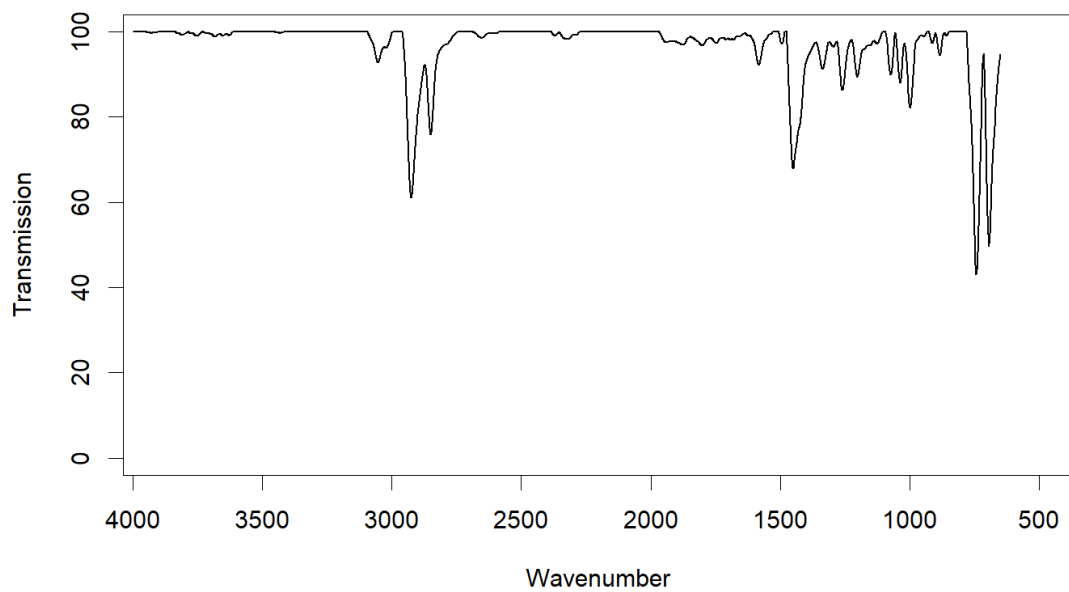

**Figure S162.** IR-spectrum (ATR, neat) of **3ad**.

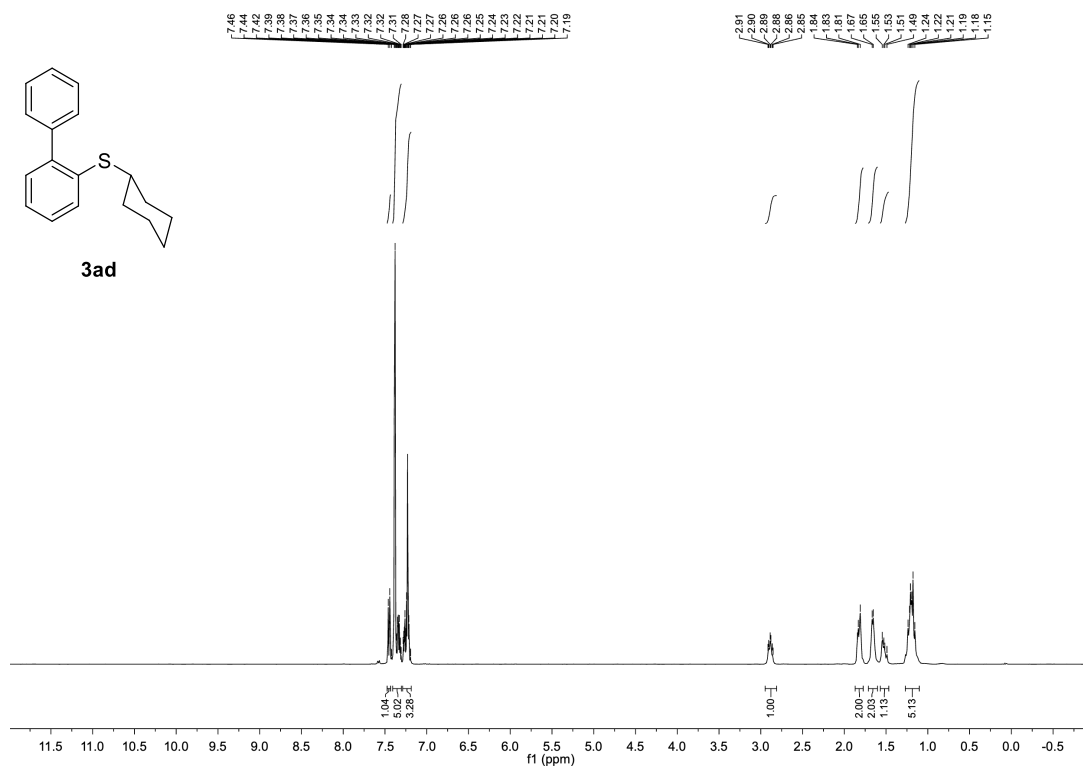

**Figure S163.**  $^1\text{H-NMR}$ -spectrum (400 MHz,  $\text{CDCl}_3$ ) of **3ad**.

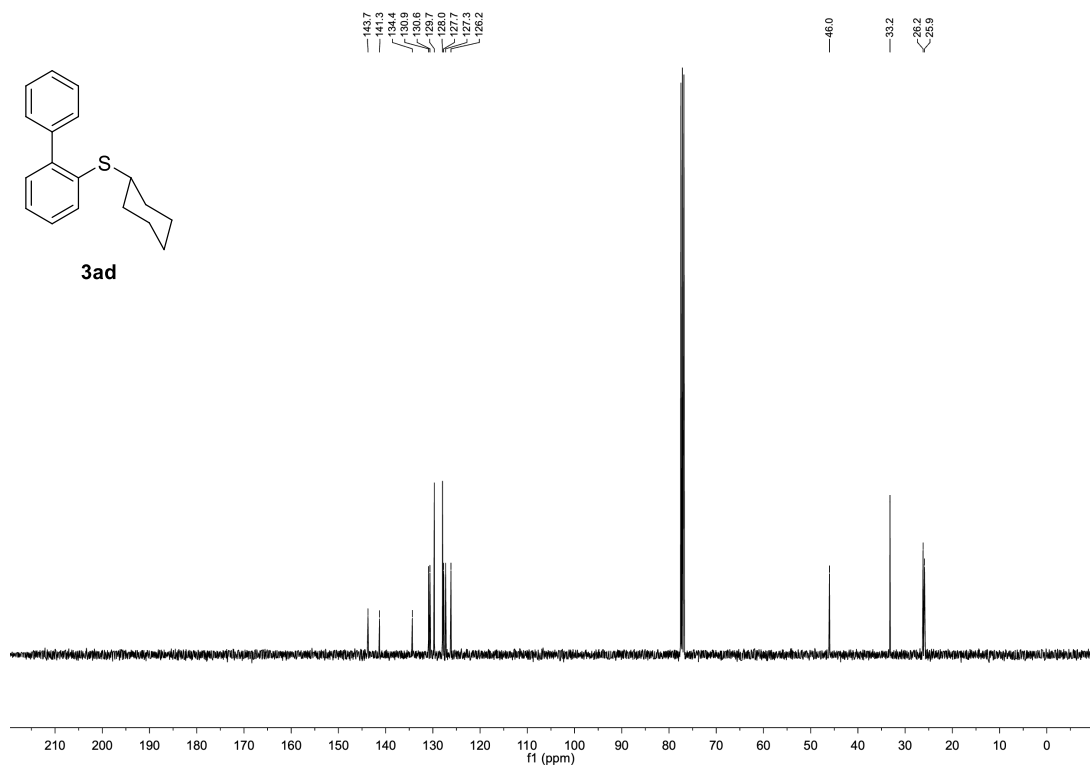

Figure S164. <sup>13</sup>C-NMR-spectrum (101 MHz, CDCl<sub>3</sub>) of **3ad**.

**[1,1'-Biphenyl]-2-yl(*tert*-butyl)sulfane (**3ae**):**

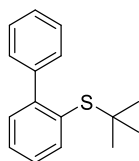

**3ae**

C<sub>16</sub>H<sub>18</sub>S (242.38 g/mol)

Following **GP-B**, **3ae** was synthesized using [1,1'-biphenyl]-2-yl trifluoromethanesulfonate (**1a**) (302 mg, 1.00 mmol, 1.0 equiv.) and *tert*-butane thiol (**2e**) (94.7 mg, 1.05 mmol, 1.05 equiv.). Purification by flash chromatography (SiO<sub>2</sub>, gradient *n*-hexane/EtOAc 100:0 to 95:5 over 10 CV) afforded **3ae** (224 mg, 924 μmol, 92%) as colorless solid.

**R<sub>f</sub>**: 0.21 (*n*-hexane).

**m. p.**: 46.2 – 49.2 °C.

**<sup>1</sup>H-NMR** (400 MHz, CDCl<sub>3</sub>, δ): 7.74 – 7.67 (m, 1H), 7.42 – 7.29 (m, 8H), 1.04 (s, 9H).

**<sup>13</sup>C-NMR** (101 MHz, CDCl<sub>3</sub>, δ): 148.5, 142.0, 139.6, 131.2, 130.9, 130.8, 129.0, 127.4, 127.2, 126.9, 47.6, 31.1.

**HR-MS** (APCI): *m/z* calc for [M+H]<sup>+</sup> 243.12020, found 243.12059.

**IR** (ATR,  $\tilde{\nu}$  [cm<sup>-1</sup>]): 3051 (w), 2966 (m), 2924 (w), 2894 (w), 2860 (w), 1873 (w), 1839 (w), 1802 (w), 1751 (w), 1711 (w), 1661 (w), 1582 (w), 1453 (m), 1418 (m), 1396 (w), 1358 (m), 1247 (w), 1213 (w), 1161 (m), 1072 (w), 1034 (w), 1008 (w), 960 (w), 911 (w), 777 (w), 742 (s), 695 (s).

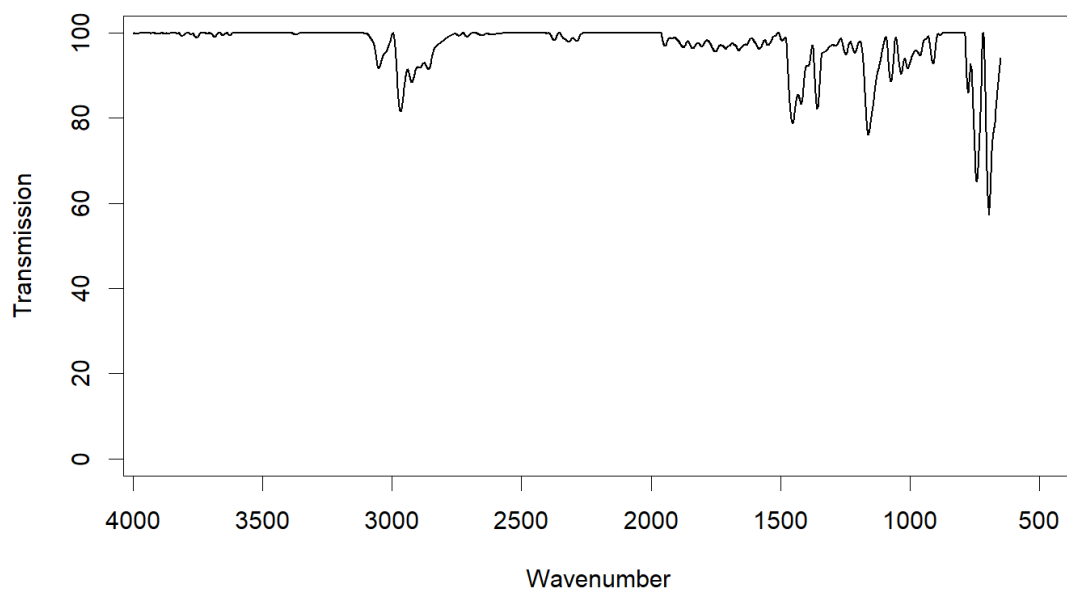

**Figure S165.** IR-spectrum (ATR, neat) of **3ae**.

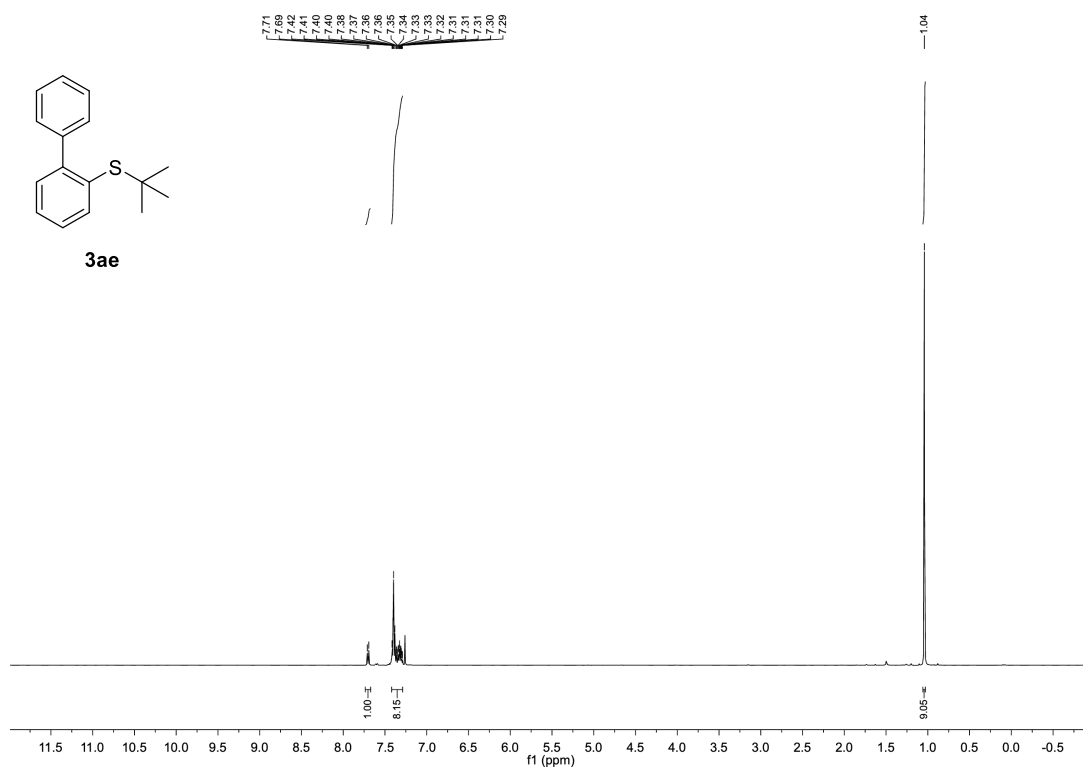

**Figure S166.**  $^1\text{H-NMR}$ -spectrum (400 MHz,  $\text{CDCl}_3$ ) of **3ae**.

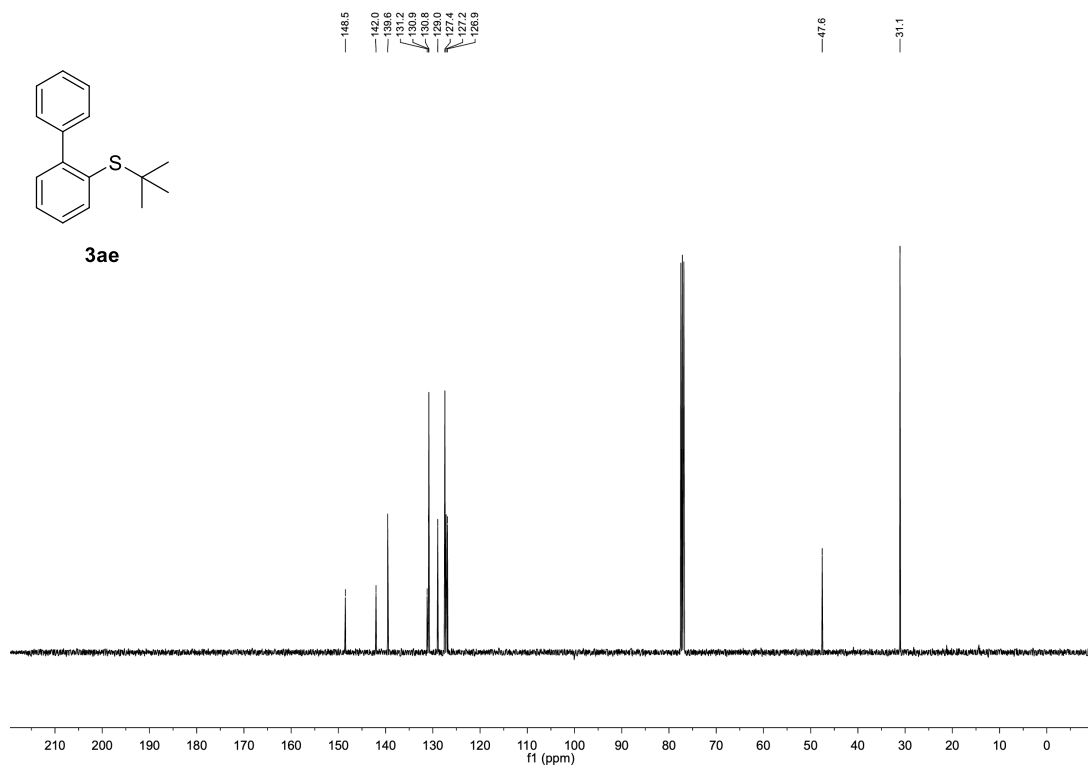

Figure S167. <sup>13</sup>C-NMR-spectrum (101 MHz, CDCl<sub>3</sub>) of 3ae.

**Methyl 3-([1,1'-biphenyl]-2-ylthio)propanoate (3af):**

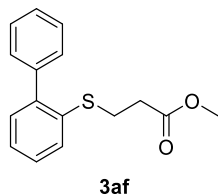

C<sub>16</sub>H<sub>16</sub>O<sub>2</sub>S (272.36 g/mol)

Following **GP-B**, **3af** was synthesized using [1,1'-biphenyl]-2-yl trifluoromethanesulfonate (**1a**) (302 mg, 1.00 mmol, 1.0 equiv.) and methyl 3-mercaptopropanoate (**2f**) (126 mg, 1.05 mmol, 1.05 equiv.). Purification by flash chromatography (SiO<sub>2</sub>, gradient *n*-hexane/EtOAc 100:0 to 80:20 over 10 CV) afforded **3af** (111 mg, 408 μmol, 41%) as colorless oil.

**R<sub>f</sub>**: 0.40 (*n*-hexane/EtOAc 90:10).

**<sup>1</sup>H-NMR** (400 MHz, CDCl<sub>3</sub>, δ): 7.42 – 7.22 (m, 9H), 3.61 (s, 3H), 2.96 (t, *J* = 7.6 Hz, 2H), 2.49 (t, *J* = 7.6 Hz, 2H).

**<sup>13</sup>C-NMR** (101 MHz, CDCl<sub>3</sub>, δ): 172.3, 143.1, 140.7, 134.1, 130.7, 129.6, 129.1, 128.1, 128.1, 127.6, 126.3, 51.9, 34.0, 28.6.

**HR-MS** (ESI): *m/z* calc for [M+Na]<sup>+</sup> 295.07632, found 295.07631.

**IR** (ATR,  $\tilde{\nu}$  [cm<sup>-1</sup>]): 3051 (w), 3021 (w), 2946 (w), 1732 (vs), 1582 (w), 1456 (m), 1429 (s), 1352 (m), 1288 (w), 1239 (s), 1198 (s), 1168 (s), 1143 (s), 1075 (w), 1038 (m), 1012 (m), 978 (m), 945 (w), 915 (w), 889 (w), 852 (w), 848 (w), 826 (w), 744 (vs), 695 (s).

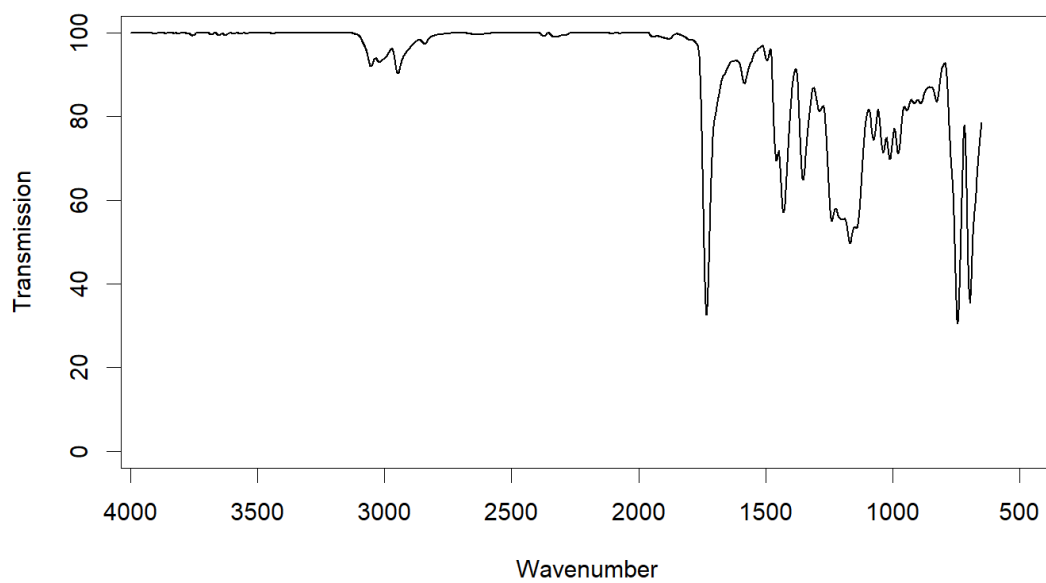

**Figure S168.** IR-spectrum (ATR, neat) of **3af**.

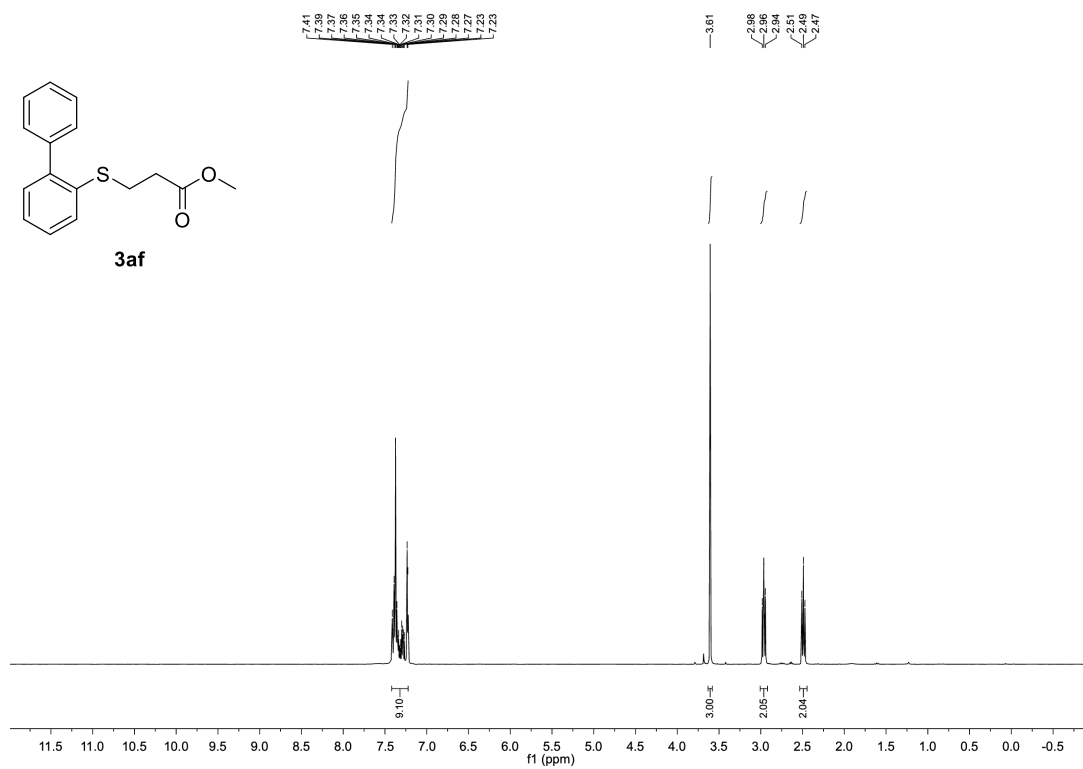

**Figure S169.**  $^1\text{H-NMR}$ -spectrum (400 MHz,  $\text{CDCl}_3$ ) of **3af**.



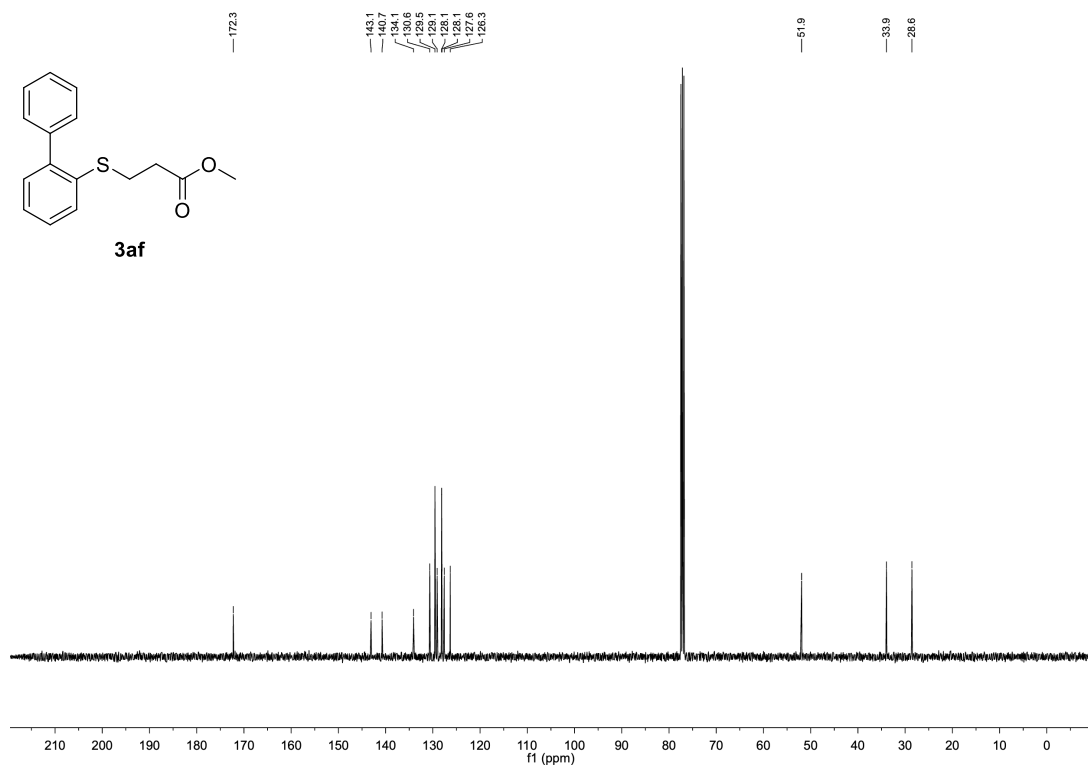

Figure S170. <sup>13</sup>C-NMR-spectrum (101 MHz, CDCl<sub>3</sub>) of **3af**.

**2-([1,1'-Biphenyl]-2-ylthio)-3-methyltetrahydrofuran (3ag):**

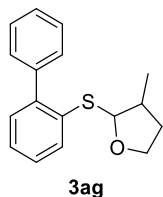

C<sub>17</sub>H<sub>18</sub>OS (270.39 g/mol)

Following **GP-B**, **3ag** was synthesized using [1,1'-biphenyl]-2-yl trifluoromethanesulfonate (**1a**) (302 mg, 1.00 mmol, 1.0 equiv.) and 3-methyltetrahydrofuran-2-thiol (**2g**) (mixture of diastereomers ca. 6:4) (124 mg, 1.05 mmol, 1.05 equiv.). Purification by flash chromatography (SiO<sub>2</sub>, gradient *n*-hexane/EtOAc 100:0 to 80:20 over 10 CV) afforded **3ag** (177 mg, 655 μmol, 66%, diastereomeric mixture according to starting material) as colorless oil.

R<sub>f</sub>: 0.40, 0.49 (*n*-hexane/EtOAc 90:10).

<sup>1</sup>H-NMR (400 MHz, CDCl<sub>3</sub>, δ): Mixture of diastereomers: 7.46 – 7.20 (m, 9H), 4.12 – 2.89 (m, 4H), 2.28 – 2.10 (m, 1H), 1.88 – 1.70 (m, 1H), 1.13 – 0.99 (m, 3H).

<sup>13</sup>C-NMR (101 MHz, CDCl<sub>3</sub>, δ): Mixture of diastereomers: 143.7, 143.2, 140.9, 134.9, 134.1, 131.2, 130.7, 130.1, 129.7, 129.6, 128.1, 127.9, 127.6, 127.5, 126.8, 126.3, 80.3, 66.7, 65.9, 51.0, 49.3, 34.3, 33.2, 19.7, 17.0.

HR-MS (APCI): *m/z* calc for [M+H]<sup>+</sup> 271.11511, found 271.11563.

IR (ATR,  $\tilde{\nu}$  [cm<sup>-1</sup>]): 3051 (w), 3021 (w), 2969 (w), 2928 (w), 2861 (w), 1582 (w), 1455 (m), 1435 (m), 1377 (w), 1351 (w), 1317 (w), 1287 (w), 1221 (w), 1187 (w), 1105 (m), 1068 (m), 1038 (m), 1012 (m), 945 (w), 915 (w), 854 (m), 744 (vs), 695 (s).

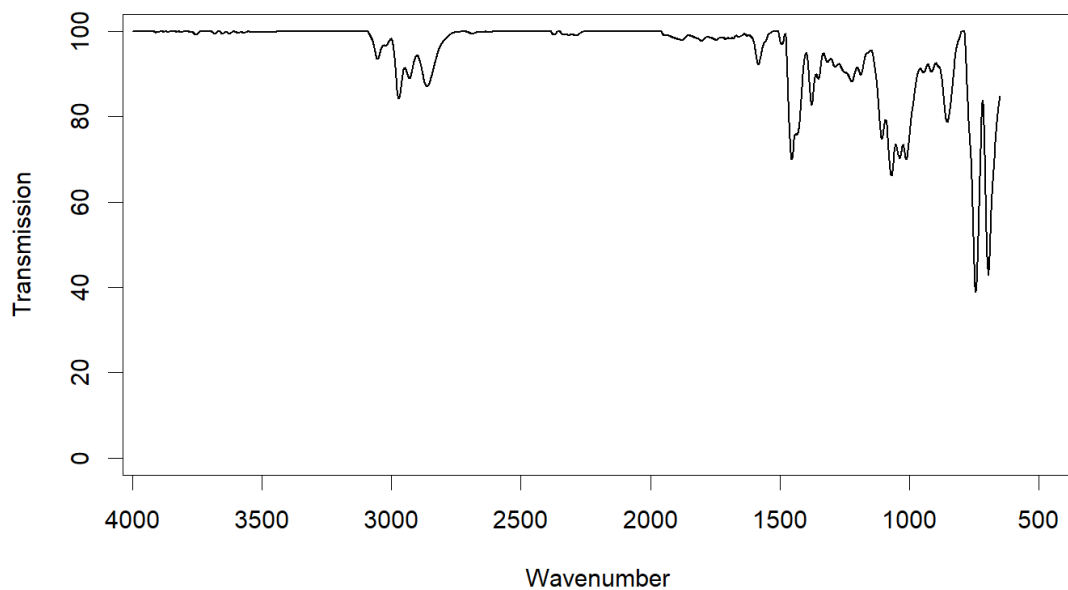

Figure S171. IR-spectrum (ATR, neat) of **3ag**.

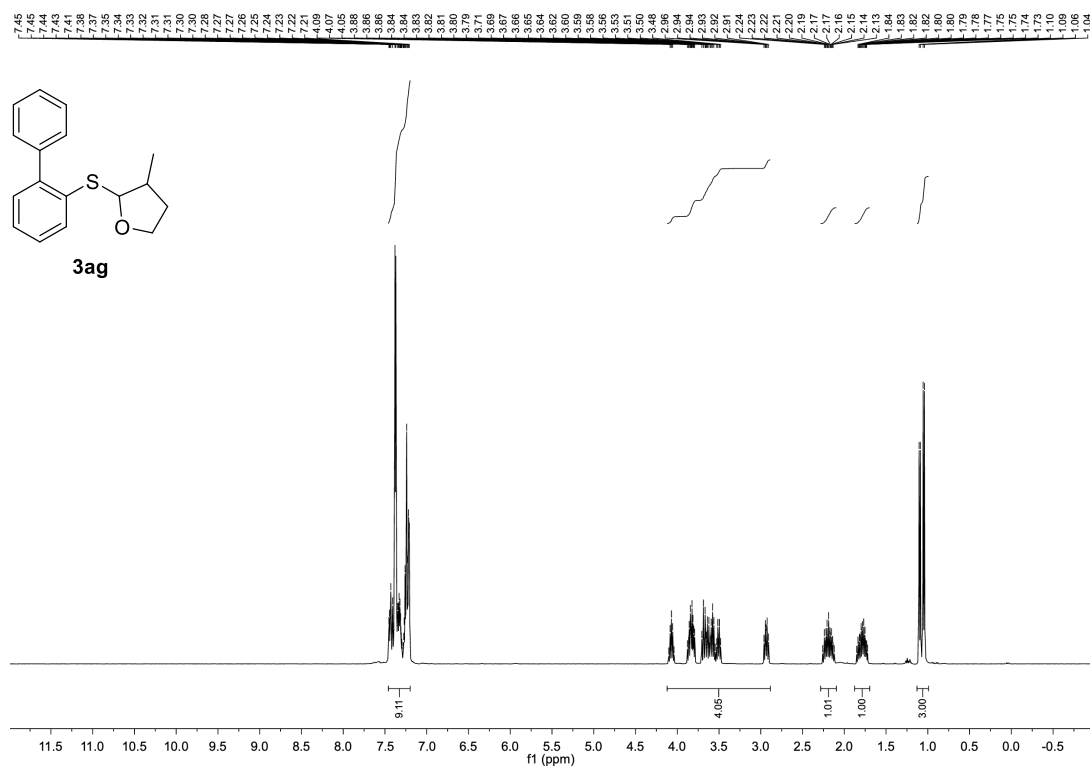

Figure S172.  $^1\text{H-NMR}$ -spectrum (400 MHz,  $\text{CDCl}_3$ ) of **3ag**.

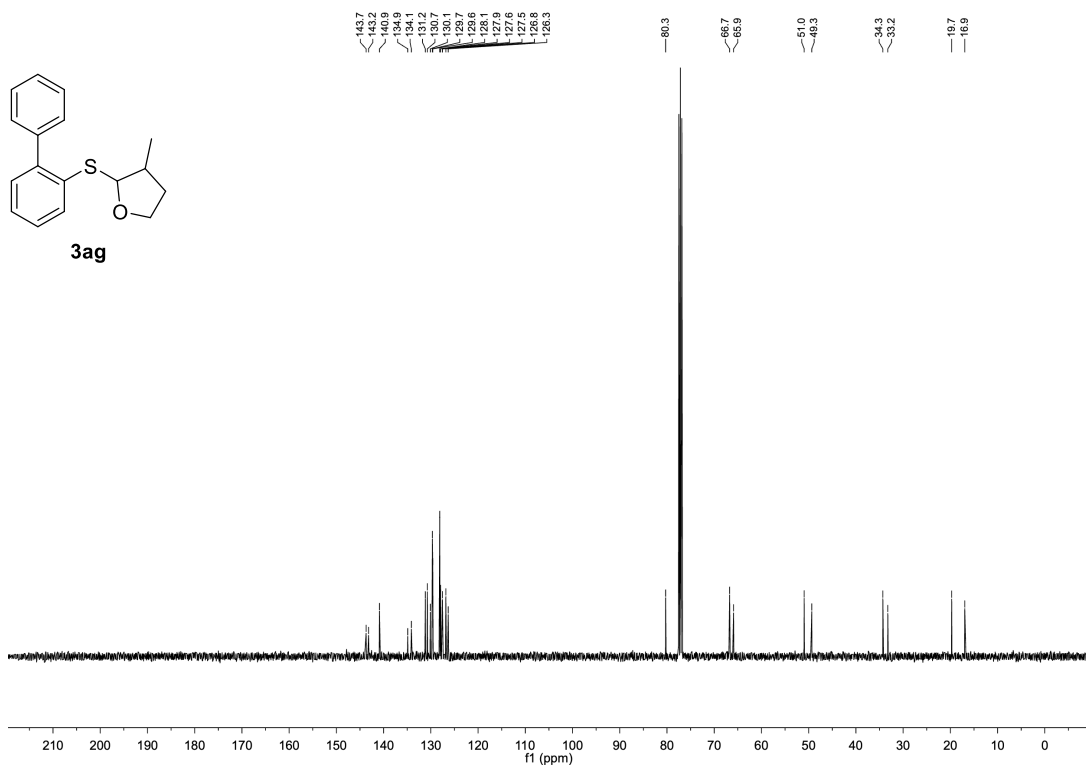

Figure S173. <sup>13</sup>C-NMR-spectrum (101 MHz, CDCl<sub>3</sub>) of **3ag**.

**Methyl 2-(1-((1,1'-biphenyl)-2-ylthio)methyl)cyclopropyl)acetate (3ah):**

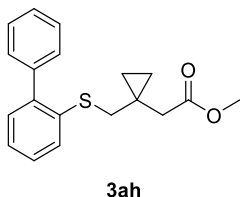

C<sub>19</sub>H<sub>20</sub>O<sub>2</sub>S (312.43 g/mol)

Following **GP-B**, **3ah** was synthesized using [1,1'-biphenyl]-2-yl trifluoromethanesulfonate (**1a**) (302 mg, 1.00 mmol, 1.0 equiv.) and methyl 2-(1-(mercaptomethyl)cyclopropyl)acetate (**2h**) (168 mg, 1.05 mmol, 1.05 equiv.). Purification by flash chromatography (SiO<sub>2</sub>, gradient *n*-hexane/EtOAc 100:0 to 90:10 over 15 CV) afforded **3ah** (162 mg, 519 μmol, 52%) as colorless oil.

**R<sub>f</sub>**: 0.59 (*n*-hexane/EtOAc 90:10).

**<sup>1</sup>H-NMR** (400 MHz, CDCl<sub>3</sub>, δ): 7.48 – 7.36 (m, 6H), 7.31 – 7.23 (m, 3H), 3.62 (s, 3H), 2.89 (s, 2H), 2.31 (s, 2H), 0.43 (s, 4H).

**<sup>13</sup>C-NMR** (101 MHz, CDCl<sub>3</sub>, δ): 172.7, 143.1, 141.0, 135.6, 130.4, 130.0, 129.7, 128.0, 127.9, 127.4, 126.2, 51.5, 42.6, 40.0, 16.8, 12.6.

**HR-MS** (ESI): *m/z* calc for [M+Na]<sup>+</sup> 335.10762, found 335.10822.

**IR** (ATR,  $\tilde{\nu}$  [cm<sup>-1</sup>]): 3055 (w), 3002 (w), 2947 (w), 2917 (w), 2842 (w), 1732 (s), 1582 (w), 1459 (m), 1429 (m), 1363 (w), 1306 (w), 1232 (m), 1198 (m), 1159 (s), 1079 (w), 1015 (s), 964 (w), 900 (m), 874 (w), 837 (w), 744 (s), 699 (s).

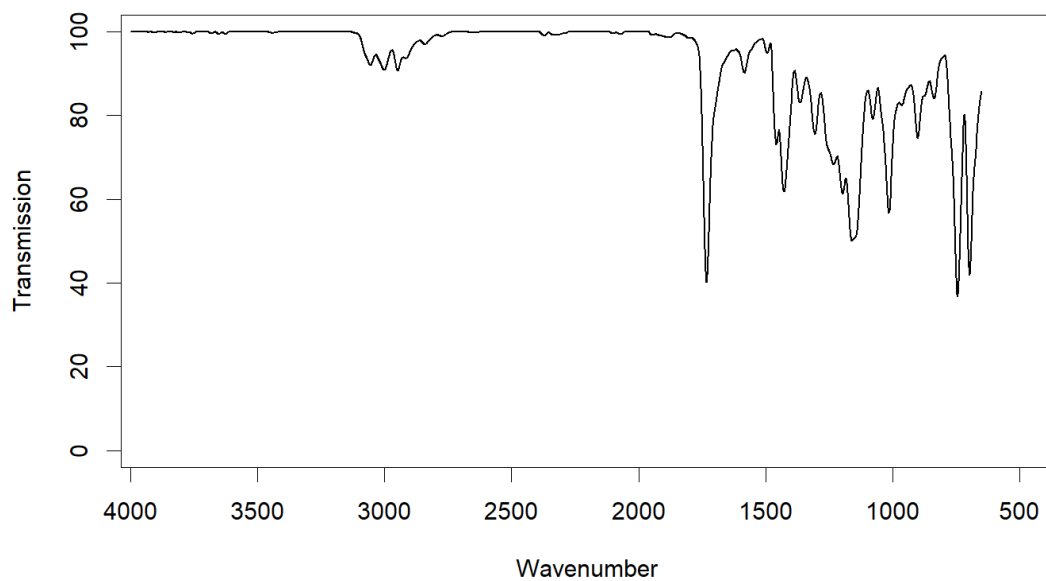

**Figure S174.** IR-spectrum (ATR, neat) of **3ah**.

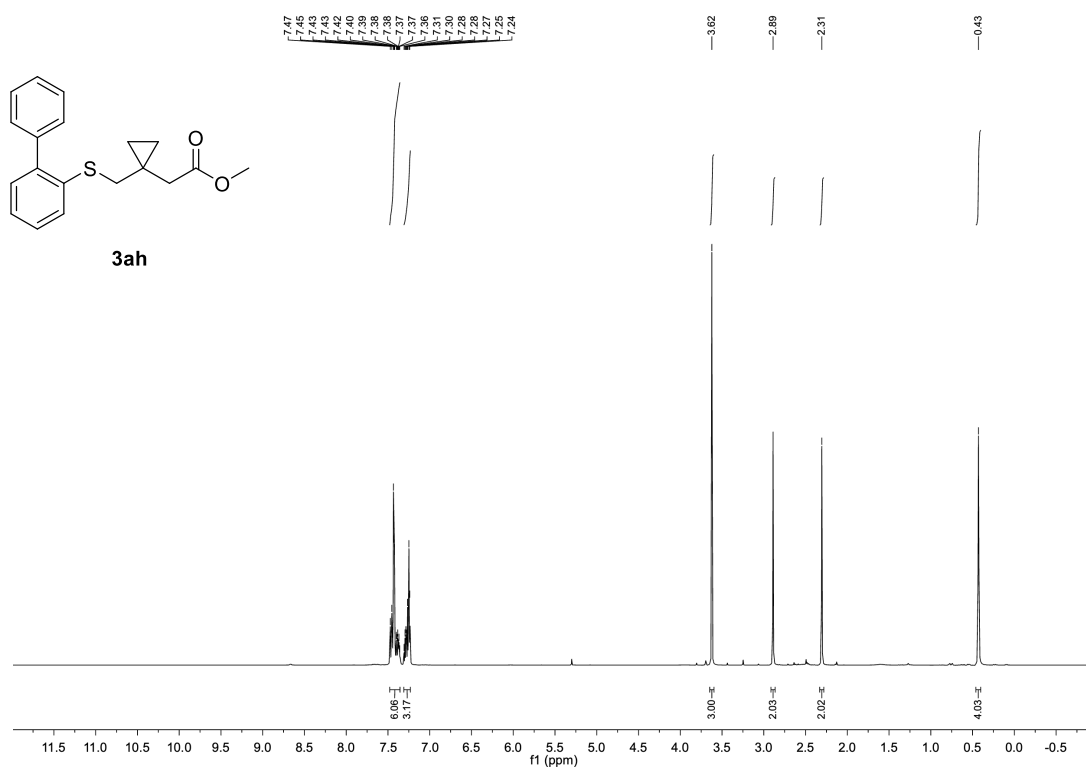

**Figure S175.** <sup>1</sup>H-NMR-spectrum (400 MHz, CDCl<sub>3</sub>) of **3ah**.

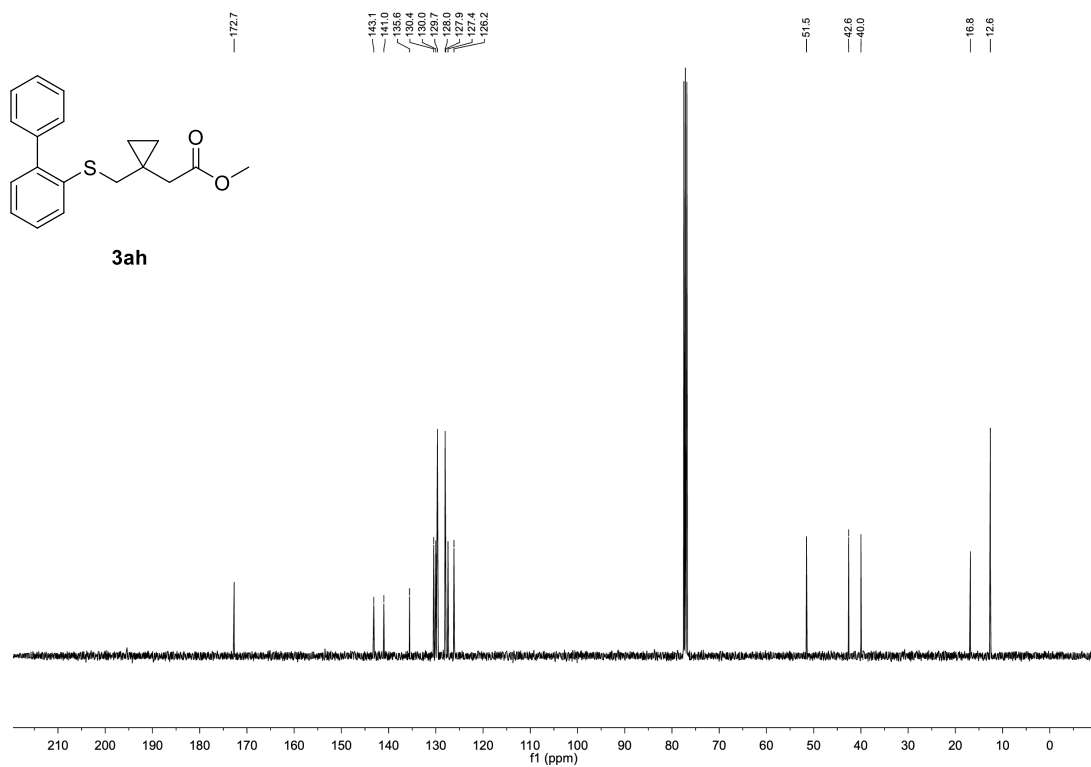

Figure S176. <sup>13</sup>C-NMR-spectrum (101 MHz, CDCl<sub>3</sub>) of **3ah**.

***tert*-Butyl 3-([1,1'-biphenyl]-2-ylthio)azetidine-1-carboxylate (**3ai**):**

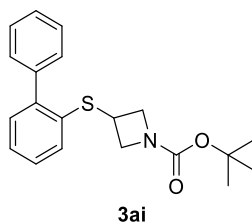

$C_{20}H_{23}NO_2S$  (341.47 g/mol)

Following **GP-B**, **3ai** was synthesized using [1,1'-biphenyl]-2-yl trifluoromethanesulfonate (**1a**) (302 mg, 1.00 mmol, 1.0 equiv.) and *tert*-butyl 3-mercaptoazetidine-1-carboxylate (**2i**) (199 mg, 1.05 mmol, 1.05 equiv.). Purification by flash chromatography ( $SiO_2$ , gradient *n*-hexane/EtOAc 100:0 to 90:10 over 10 CV) afforded **3ai** (52 mg, 152  $\mu$ mol, 15%) as colorless oil.

**R<sub>f</sub>**: 0.37 (*n*-hexane/EtOAc 90:10).

**<sup>1</sup>H-NMR** (400 MHz,  $CDCl_3$ ,  $\delta$ ): 7.50 – 7.38 (m, 5H), 7.34 – 7.24 (m, 3H), 7.11 (d,  $J = 7.5$  Hz, 1H), 4.31 – 4.22 (m, 2H), 3.90 – 3.81 (m, 1H), 3.81 – 3.73 (m, 2H), 1.43 (s, 9H).

**<sup>13</sup>C-NMR** (101 MHz,  $CDCl_3$ ,  $\delta$ ): 155.9, 142.0, 140.4, 134.4, 130.7, 129.4, 128.3, 128.2, 127.8, 127.4, 126.2, 79.8, 56.3, 33.2, 28.5.

**HR-MS** (ESI):  $m/z$  calc for  $[M+Na]^+$  364.13417, found 364.13461.

**IR** (ATR,  $\bar{\nu}$  [ $cm^{-1}$ ]): 3058 (w), 2973 (w), 2880 (w), 1690 (s), 1459 (w), 1393 (s), 1303 (w), 1247 (w), 1133 (s), 1038 (w), 975 (w), 907 (s), 856 (w), 725 (s).



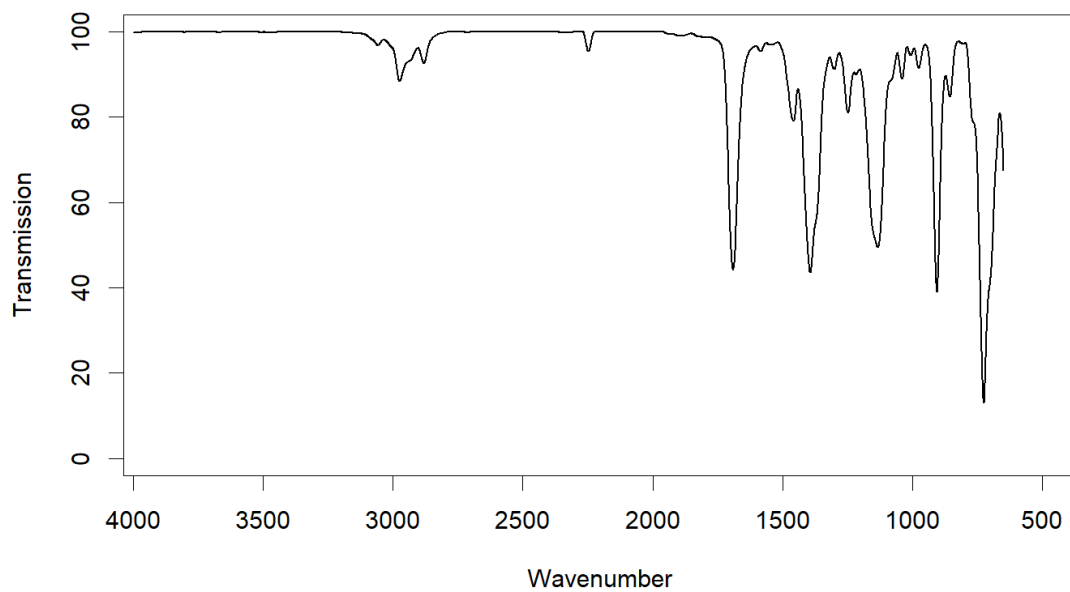

Figure S177. IR-spectrum (ATR, neat) of **3ai**.

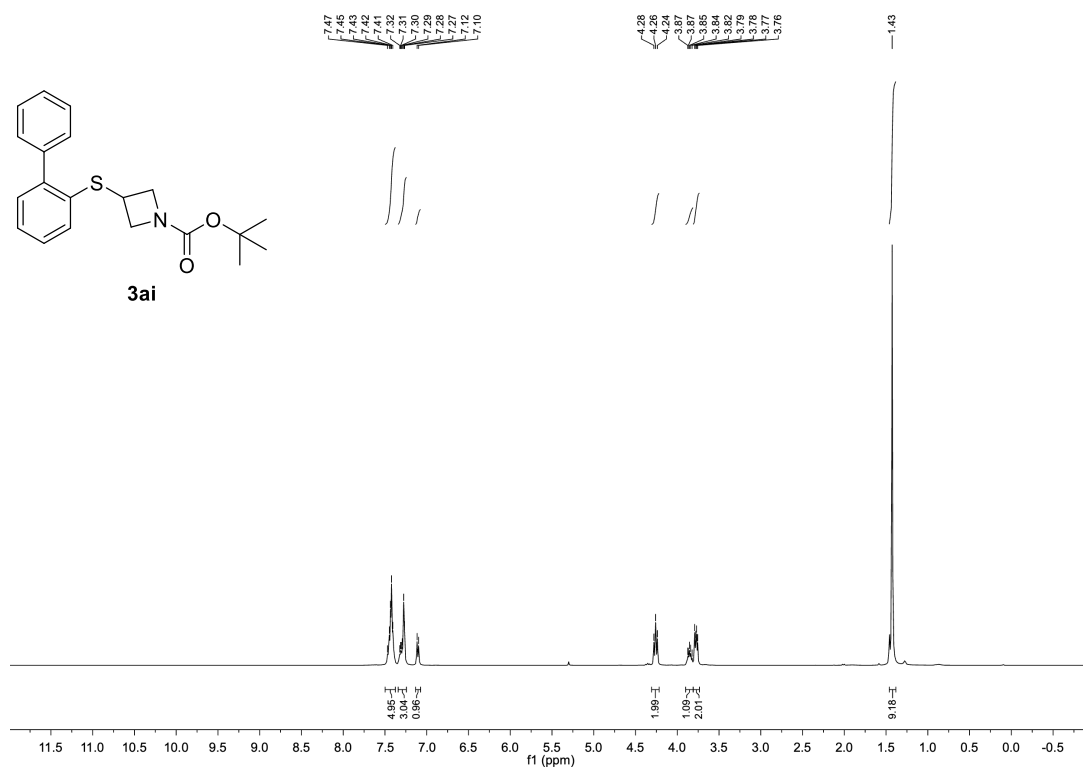

Figure S178.  $^1\text{H}$ -NMR-spectrum (400 MHz,  $\text{CDCl}_3$ ) of **3ai**.

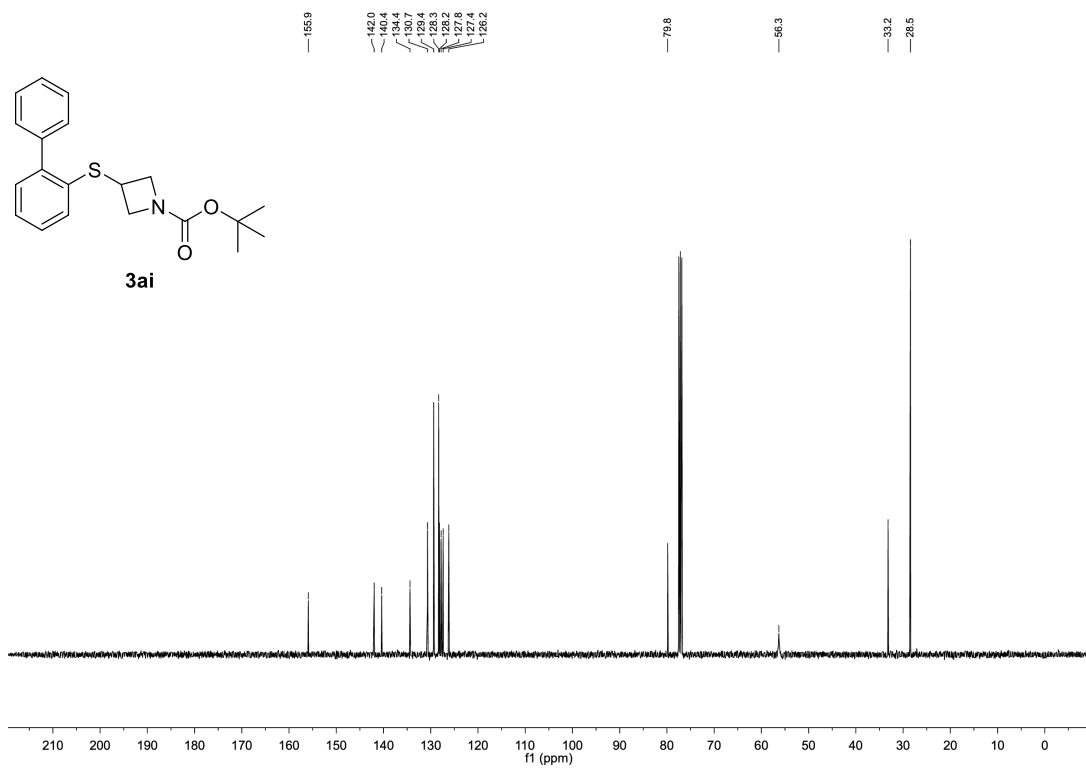

Figure S179. <sup>13</sup>C-NMR-spectrum (101 MHz, CDCl<sub>3</sub>) of **3ai**.

**2-(2-([1,1'-Biphenyl]-2-ylthio)propan-2-yl)-5-methylcyclohexan-1-one (3aj):**

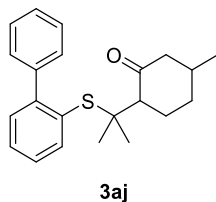

C<sub>22</sub>H<sub>26</sub>OS (338.51 g/mol)

Following **GP-B**, **3aj** was synthesized using [1,1'-biphenyl]-2-yl trifluoromethanesulfonate (**1a**) (302 mg, 1.00 mmol, 1.0 equiv.) and 8-mercaptomenthone (**2j**) (mixture of diastereomers ca. 8:2) (196 mg, 1.05 mmol, 1.05 equiv.). Purification by flash chromatography (SiO<sub>2</sub>, gradient *n*-hexane/EtOAc 100:0 to 85:15 over 15 CV) afforded **3aj** (240 mg, 709 μmol, 71%, diastereomeric mixture according to starting material) as colorless oil.

**R<sub>f</sub>**: 0.63, 0.70 (*n*-hexane/EtOAc 90:10).

**<sup>1</sup>H-NMR** (400 MHz, CDCl<sub>3</sub>, δ): 7.72 – 7.64 (m, 1H), 7.46 – 7.27 (m, 8H), 2.23 – 2.03 (m, 3H), 1.85 – 1.62 (m, 3H), 1.48 – 1.41 (m, 1H), 1.33 – 1.21 (m, 1H), 1.17 – 1.09 (m, 6H), 0.95 – 0.84 (m, 3H).

**<sup>13</sup>C-NMR** (101 MHz, CDCl<sub>3</sub>, δ): Major isomer: 211.1, 148.6, 142.0, 140.0, 131.1, 130.9, 130.7, 129.2, 127.7, 127.2, 127.1, 58.4, 52.6, 52.4, 36.9, 34.6, 29.8, 28.0, 24.7, 22.4.

**HR-MS** (ESI): *m/z* calc for [M+Na]<sup>+</sup> 361.15966, found 361.16021.

**IR** (ATR,  $\tilde{\nu}$  [cm<sup>-1</sup>]): 3054 (w), 2954 (m), 2924 (w), 2868 (w), 1705 (s), 1585 (w), 1453 (m), 1359 (w), 1314 (w), 1276 (w), 1202 (w), 1161 (w), 1120 (m), 1087 (w), 1042 (m), 989 (w), 953 (w), 915 (w), 874 (w), 841 (w), 748 (s), 699 (s).

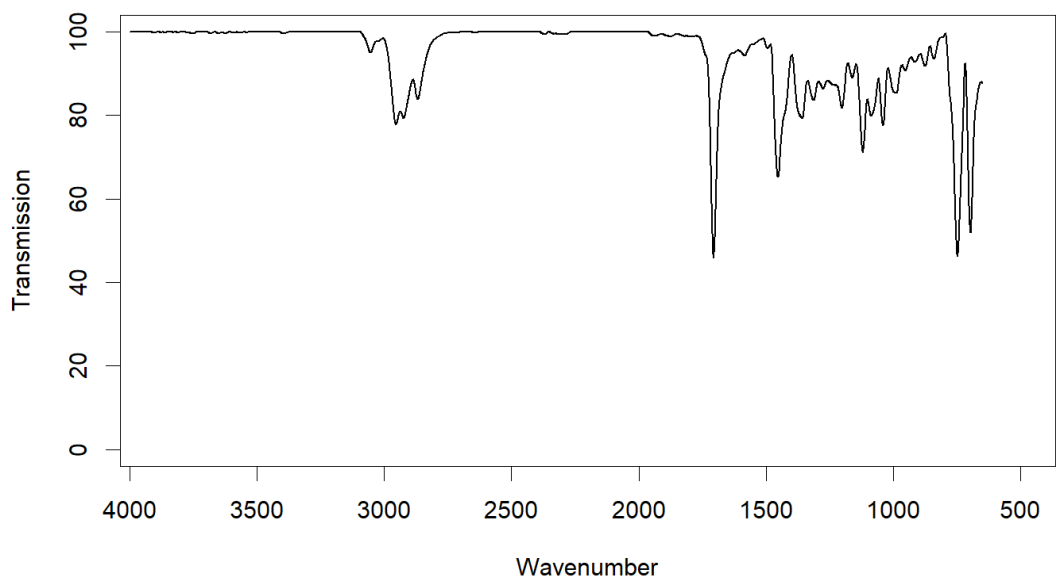

Figure S180. IR-spectrum (ATR, neat) of **3aj**.

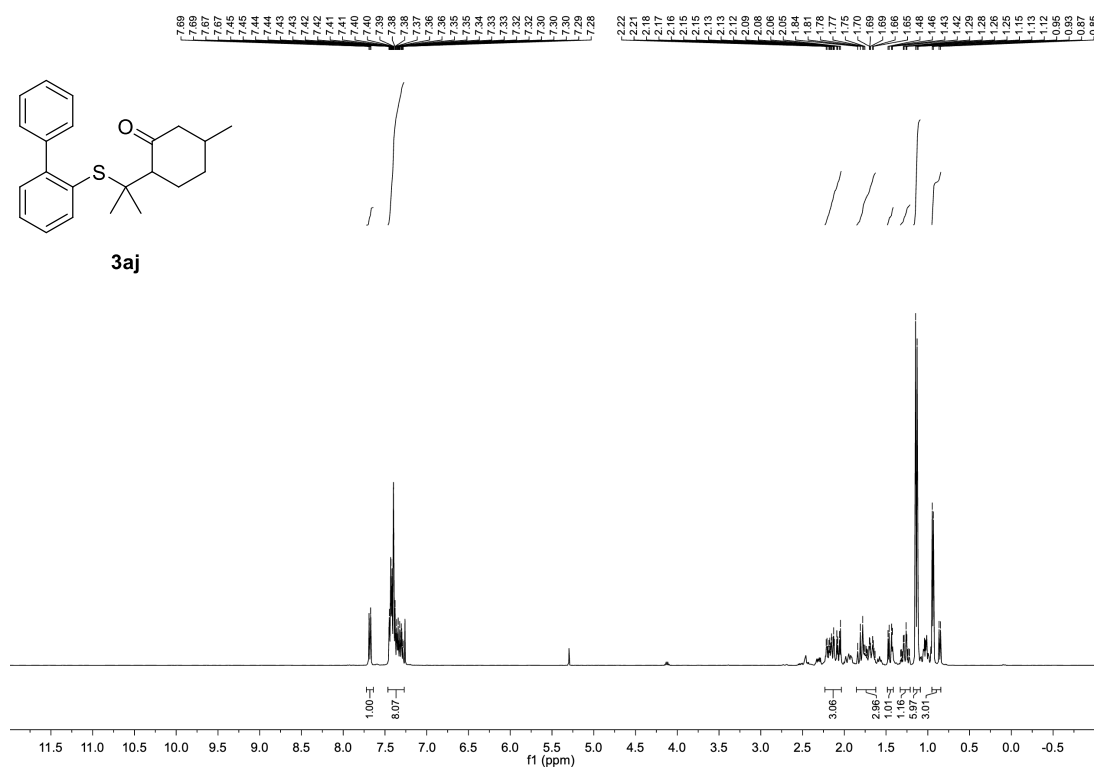

Figure S181.  $^1\text{H-NMR}$ -spectrum (400 MHz,  $\text{CDCl}_3$ ) of **3aj**.

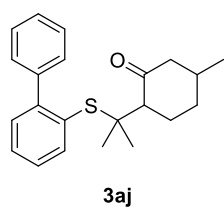

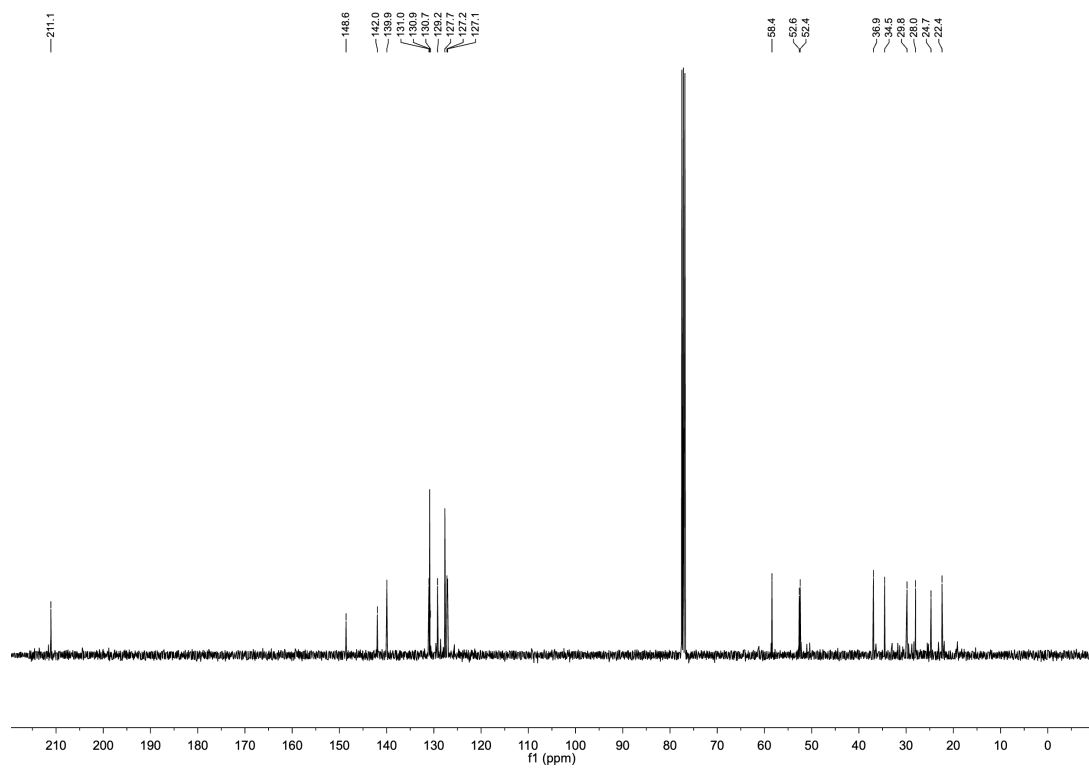

Figure S182.  $^{13}\text{C}$ -NMR-spectrum (101 MHz,  $\text{CDCl}_3$ ) of **3aj**.

## 6. Unsuccessful Substrates

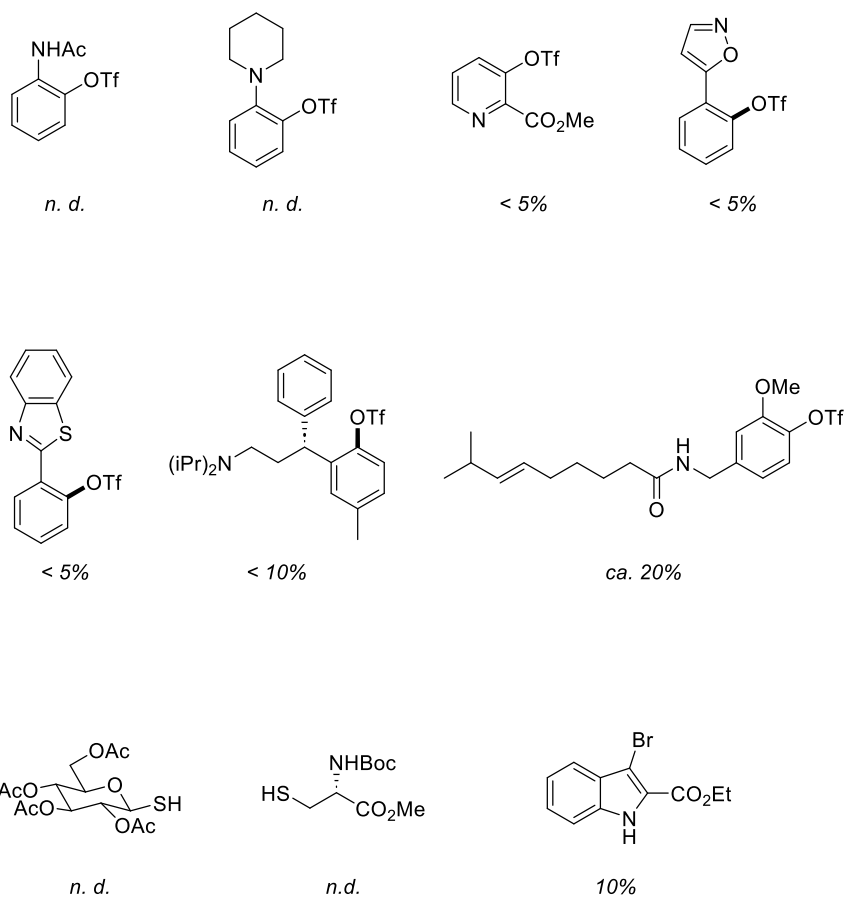

**Figure S183.** Unsuccessful substrates in the nickel-catalyzed C-S cross-coupling with adamantane thiol (**2b**).

## 7. Computational Methods and Data

All reported computations were performed with the gaussian16 program.<sup>19</sup> Geometries were fully optimized at the B3LYP-D3BJ/def2-SVP level of theory.<sup>20-22</sup> Analytical frequency computations were undertaken in order to assure the nature of the stationary point with minima exhibiting zero and transition states exactly one imaginary mode. Intrinsic reaction coordinates were computed starting from the transition states by using the local quadratic approximation.<sup>23, 24</sup> Free energies were computed using standard thermochemistry equations implemented in gaussian.<sup>25</sup> Free energies were corrected for the one-molar standard state by adding 1.89 kcal mol<sup>-1</sup> to each structure's energy.<sup>26</sup> In addition, M06-L/def2-QZVPP single point energies were computed on top of each structure utilizing the SMD solvation model with THF as a solvent.<sup>27</sup>

In the following energy landscapes of the oxidative addition, as well as the base-assisted thiol coordination, the phenyl groups of DPEphos and all hydrogens (except HS-Ad) are omitted for clarity. In the single-point structures, phenyl groups or hydrogens were omitted if necessary.

### Oxidative Addition of 2-Ph-PhOTf (1a) to (DPEphos)Ni(COD)

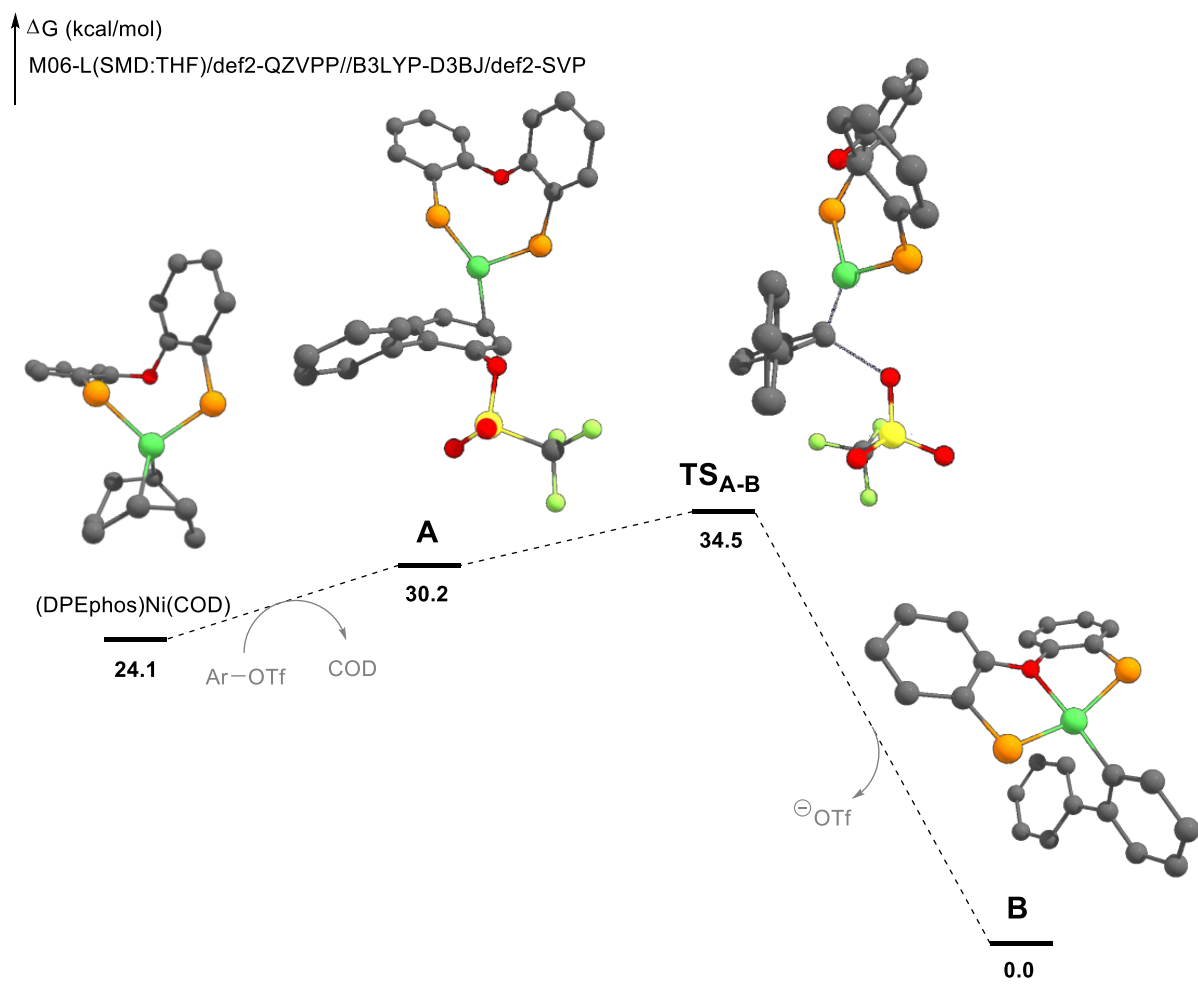



**(DPEphos)Ni(COD):**

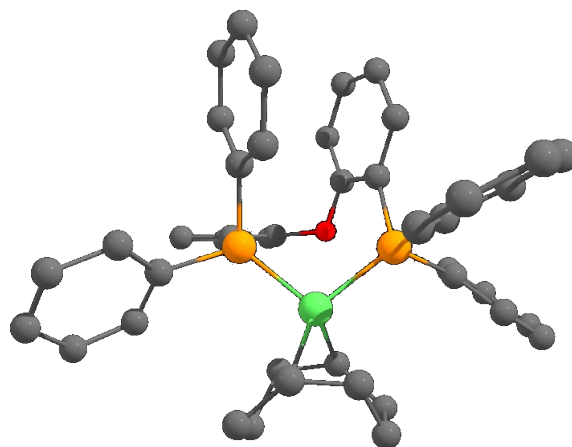

|    |             |             |             |
|----|-------------|-------------|-------------|
| Ni | -0.01336200 | -1.20338000 | -0.42670900 |
| P  | 1.67854300  | 0.13217600  | -0.11456400 |
| P  | -1.71988200 | 0.08238000  | -0.03574500 |
| O  | -0.07103500 | 0.28603500  | 2.42358800  |
| C  | 0.93771700  | -2.85219000 | 0.59245000  |
| H  | 1.67089900  | -2.42431000 | 1.28112800  |
| C  | 0.38281000  | -2.29110100 | -2.17784700 |
| H  | 0.60581000  | -1.58872200 | -2.98959600 |
| C  | -0.51806000 | 1.54030000  | 2.04277800  |
| C  | -1.36737900 | 1.62772200  | 0.92817200  |
| C  | 1.48034900  | -3.29064100 | -1.88602900 |
| H  | 2.44368900  | -2.79921400 | -2.07703300 |
| H  | 1.43183500  | -4.13886600 | -2.59849400 |
| C  | -5.09603000 | -2.09556600 | 0.89391900  |
| H  | -5.85555500 | -2.64625200 | 0.33328300  |
| C  | -3.14074600 | -0.68840700 | 2.30577400  |
| H  | -2.37477600 | -0.15747000 | 2.87004600  |
| C  | 3.25753500  | -0.32875900 | -0.96279700 |
| C  | 1.46984700  | -3.83669000 | -0.43752200 |
| H  | 0.87595700  | -4.76255300 | -0.38959200 |
| H  | 2.49527000  | -4.13193800 | -0.16306500 |
| C  | 3.69808200  | 0.35181700  | -2.10854300 |
| H  | 3.17011400  | 1.24292900  | -2.44956500 |
| C  | 2.23144700  | 0.21983400  | 1.66643700  |

|   |             |             |             |
|---|-------------|-------------|-------------|
| C | -0.95375900 | -2.46354200 | -1.81775200 |
| H | -1.69358800 | -1.87950900 | -2.37008400 |
| C | 3.58327300  | 0.19556700  | 2.04914800  |
| H | 4.35382400  | 0.26804600  | 1.28175400  |
| C | -3.11805000 | -0.67312000 | 0.90254200  |
| C | -1.77468400 | 2.91198100  | 0.53234100  |
| H | -2.39191600 | 3.02771800  | -0.35693800 |
| C | -1.50069700 | -3.71302200 | -1.13891800 |
| H | -0.93709100 | -4.59220100 | -1.48981100 |
| H | -2.53765500 | -3.87498400 | -1.47400700 |
| C | -4.10520600 | -1.39334300 | 0.20637100  |
| H | -4.09688200 | -1.41010200 | -0.88490600 |
| C | -1.48548600 | -3.65259800 | 0.40739600  |
| H | -2.44767100 | -3.26399800 | 0.76302200  |
| H | -1.40946800 | -4.67936000 | 0.81726700  |
| C | -3.90214500 | 1.37266800  | -1.37637600 |
| H | -4.38411100 | 1.43443700  | -0.39861600 |
| C | -1.37735900 | 4.05200600  | 1.23162100  |
| H | -1.69949600 | 5.03668100  | 0.88671600  |
| C | -0.12698500 | 2.67090400  | 2.76356600  |
| H | 0.53152200  | 2.55495300  | 3.62511800  |
| C | -0.38985900 | -2.78305300 | 0.98047900  |
| H | -0.61893300 | -2.29200000 | 1.93068300  |
| C | 4.81320400  | -0.09643600 | -2.82299300 |
| H | 5.13622700  | 0.44947900  | -3.71299800 |
| C | -4.54837100 | 1.89208900  | -2.49909700 |
| H | -5.52898300 | 2.36252600  | -2.39188500 |
| C | -5.11293400 | -2.10122500 | 2.29173800  |
| H | -5.88627200 | -2.65294100 | 2.83141100  |
| C | -3.94453100 | 1.80905400  | -3.75886600 |
| H | -4.45216300 | 2.21396300  | -4.63780900 |
| C | 3.97101200  | -1.47023900 | -0.55190900 |
| H | 3.65035500  | -2.02352700 | 0.33059600  |
| C | 1.54671200  | 1.91907400  | -0.56824300 |
| C | 5.51708800  | -1.22568300 | -2.40019900 |

|   |             |             |             |
|---|-------------|-------------|-------------|
| H | 6.39142800  | -1.57195600 | -2.95629200 |
| C | -4.13040700 | -1.39669300 | 2.99231100  |
| H | -4.13242400 | -1.39570900 | 4.08527300  |
| C | -0.56108200 | 3.93118000  | 2.35739600  |
| H | -0.24711100 | 4.81810800  | 2.91246700  |
| C | 1.27555800  | 0.16815700  | 2.70229400  |
| C | 2.09393800  | 2.95814200  | 0.19561000  |
| H | 2.62586400  | 2.73098200  | 1.12059700  |
| C | 1.64689800  | 0.00168900  | 4.03697900  |
| H | 0.85932400  | -0.05844100 | 4.79026400  |
| C | -2.05281100 | 0.67733400  | -2.76125700 |
| H | -1.08662900 | 0.18168200  | -2.85991100 |
| C | 5.09220300  | -1.90826100 | -1.25602300 |
| H | 5.63148700  | -2.79462700 | -0.91275200 |
| C | 3.96788100  | 0.06135700  | 3.38558600  |
| H | 5.02909200  | 0.04274200  | 3.64374200  |
| C | -2.69625300 | 1.19694000  | -3.88847800 |
| H | -2.22300100 | 1.11456500  | -4.86999200 |
| C | 0.85606200  | 2.23797900  | -1.74630800 |
| H | 0.41588100  | 1.43447500  | -2.33435700 |
| C | 0.71965400  | 3.56268600  | -2.16184100 |
| H | 0.17257200  | 3.78841100  | -3.08038800 |
| C | 1.26484200  | 4.59323800  | -1.39110700 |
| H | 1.15013200  | 5.63391100  | -1.70402800 |
| C | -2.63854100 | 0.76774100  | -1.49209400 |
| C | 2.99774200  | -0.06297900 | 4.38207600  |
| H | 3.28845700  | -0.19138400 | 5.42720100  |
| C | 1.94885500  | 4.28651400  | -0.21206400 |
| H | 2.36850800  | 5.08793100  | 0.40102100  |

**B3LYP (E<sub>h</sub>):** -3965.710229

**M06-L (E<sub>h</sub>):** -3967.652466

**G-E (E<sub>h</sub>):** 0.643406

**(DPEphos)Ni(2-Ph-PhOTf) (A):**

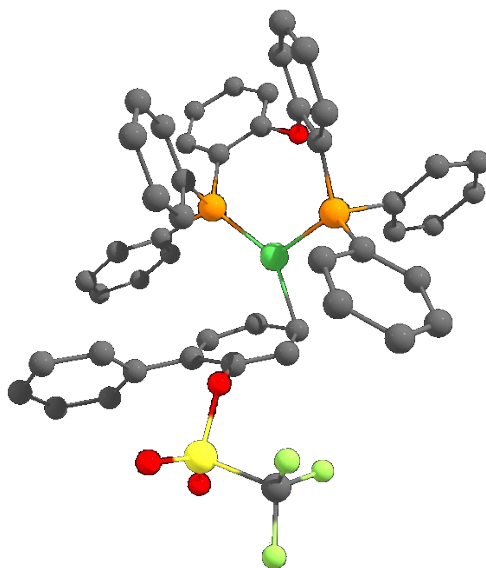

|    |             |             |            |
|----|-------------|-------------|------------|
| Ni | 1.55844154  | 3.61471856  | 0.00000000 |
| C  | -1.41147846 | 0.00204056  | 0.86269800 |
| C  | -0.98979846 | 1.33764256  | 0.97424800 |
| C  | -1.98557446 | 2.33337556  | 0.99501600 |
| C  | -3.33753346 | 2.01933856  | 0.85208300 |
| C  | -3.72929646 | 0.68534456  | 0.72376700 |
| C  | -2.76435846 | -0.32473244 | 0.74471000 |
| H  | -0.66436146 | -0.79240944 | 0.85714500 |
| H  | -4.06443346 | 2.83347956  | 0.84777500 |
| H  | -4.78745146 | 0.43713956  | 0.61423000 |
| H  | -3.06248646 | -1.37208844 | 0.66001900 |
| O  | -1.62498146 | 3.65654156  | 1.12843100 |
| C  | -1.37794046 | 4.15794556  | 2.38936100 |
| C  | -0.32476146 | 5.08264656  | 2.49566400 |
| C  | -2.14285446 | 3.78967856  | 3.49605700 |
| C  | -0.07727246 | 5.65486756  | 3.75070400 |
| C  | -1.86184446 | 4.35766956  | 4.74045200 |
| H  | -2.94441846 | 3.05916756  | 3.38280000 |
| C  | -0.83415446 | 5.29373156  | 4.86847400 |
| H  | 0.72657354  | 6.38342156  | 3.85817400 |
| H  | -2.45422146 | 4.06697756  | 5.61111500 |
| H  | -0.61611946 | 5.74347256  | 5.83938100 |

|   |             |             |             |
|---|-------------|-------------|-------------|
| P | 0.69879254  | 5.34112056  | 0.98745500  |
| P | 0.79331254  | 1.82802456  | 0.96088400  |
| C | 1.97653154  | 6.54020756  | 1.53090200  |
| C | 2.20797554  | 7.73798556  | 0.83787800  |
| C | 2.90480054  | 6.13502456  | 2.50786000  |
| C | 3.34206854  | 8.50825156  | 1.11412800  |
| H | 1.50888454  | 8.06460156  | 0.06628100  |
| C | 4.02907954  | 6.90937556  | 2.78929400  |
| H | 2.75928254  | 5.19175256  | 3.03425200  |
| C | 4.25720254  | 8.09662256  | 2.08645600  |
| H | 3.51282554  | 9.43432956  | 0.55954200  |
| H | 4.74996254  | 6.56562756  | 3.53346900  |
| H | 5.15220554  | 8.68886056  | 2.28756700  |
| C | -0.42129446 | 6.34296056  | -0.06825000 |
| C | -0.44603346 | 6.07405056  | -1.44307500 |
| C | -1.24485746 | 7.35219156  | 0.45161100  |
| C | -1.27315146 | 6.81251656  | -2.29332800 |
| H | 0.18771254  | 5.27493856  | -1.83487800 |
| C | -2.07253346 | 8.08913856  | -0.39722300 |
| H | -1.23726846 | 7.55869156  | 1.52436100  |
| C | -2.08667946 | 7.82128656  | -1.77080500 |
| H | -1.28632146 | 6.59596256  | -3.36425700 |
| H | -2.71157946 | 8.87493056  | 0.01324300  |
| H | -2.73678446 | 8.39823956  | -2.43312900 |
| C | 1.62611854  | 0.26444156  | 0.46815200  |
| C | 2.63198154  | -0.32499344 | 1.24444900  |
| C | 1.38779954  | -0.22960244 | -0.82740500 |
| C | 3.39780054  | -1.37720344 | 0.73230700  |
| H | 2.84748654  | 0.05288456  | 2.24372100  |
| C | 2.13461354  | -1.29438144 | -1.32785000 |
| H | 0.62477554  | 0.24036656  | -1.45388800 |
| C | 3.15182254  | -1.86518144 | -0.55108500 |
| H | 4.20405054  | -1.79687244 | 1.33692900  |
| H | 1.93794254  | -1.66988544 | -2.33517900 |
| H | 3.75636354  | -2.68154144 | -0.95297900 |

|   |             |             |             |
|---|-------------|-------------|-------------|
| C | 1.22648754  | 1.98290456  | 2.74158300  |
| C | 0.40418654  | 1.55509356  | 3.79012200  |
| C | 2.45314754  | 2.59964856  | 3.03934600  |
| C | 0.79683554  | 1.75292556  | 5.11702200  |
| H | -0.55223346 | 1.07730556  | 3.57171200  |
| C | 2.85533054  | 2.77422156  | 4.36333700  |
| H | 3.09045254  | 2.94155856  | 2.22188500  |
| C | 2.02150454  | 2.35931056  | 5.40694000  |
| H | 0.13939654  | 1.43227256  | 5.92860300  |
| H | 3.81608054  | 3.24814756  | 4.57973300  |
| H | 2.32585954  | 2.51103856  | 6.44521400  |
| C | 4.12680154  | 4.79333556  | -0.13853300 |
| C | 3.08670054  | 4.42916156  | -1.05619700 |
| C | 2.95246554  | 3.02837956  | -1.38699500 |
| C | 3.87966154  | 2.09168456  | -0.83677000 |
| C | 4.81161954  | 2.43761056  | 0.12436500  |
| C | 4.88365054  | 3.82848256  | 0.47150200  |
| H | 4.30970954  | 5.83939156  | 0.09828500  |
| H | 2.70898554  | 5.20670856  | -1.72659200 |
| H | 2.39467454  | 2.72603956  | -2.27926600 |
| H | 3.81570554  | 1.04935456  | -1.14774900 |
| O | 5.75795354  | 4.23462156  | 1.50221800  |
| S | 7.37680254  | 4.29281956  | 1.26099900  |
| O | 7.73476754  | 3.77794156  | -0.04703900 |
| C | 5.65922254  | 1.40098256  | 0.75765300  |
| C | 6.26557654  | 0.40798956  | -0.03216500 |
| C | 5.83310854  | 1.33739356  | 2.15182600  |
| C | 7.00038054  | -0.62415544 | 0.54957000  |
| H | 6.16429254  | 0.45985956  | -1.11761600 |
| C | 6.56888954  | 0.30461656  | 2.73459400  |
| H | 5.38054254  | 2.09655856  | 2.78773500  |
| C | 7.15293154  | -0.68397344 | 1.93834900  |
| H | 7.46577454  | -1.38178544 | -0.08594200 |
| H | 6.68619754  | 0.27478856  | 3.82050000  |
| H | 7.73348454  | -1.48869844 | 2.39578700  |

|   |            |            |            |
|---|------------|------------|------------|
| O | 8.00655254 | 3.88592956 | 2.50033100 |
| C | 7.56149954 | 6.15752856 | 1.17638400 |
| F | 8.82769254 | 6.44119856 | 0.89767000 |
| F | 7.23716854 | 6.70100456 | 2.34518700 |
| F | 6.77950954 | 6.65707056 | 0.22632500 |

**B3LYP (E<sub>h</sub>):** -5077.154888

**M06-L (E<sub>h</sub>):** -5080.044143

**G-E (E<sub>h</sub>):** 0.648249

**(DPEphos)Ni(2-Ph-PhOTf) (TS<sub>A-B</sub>):**

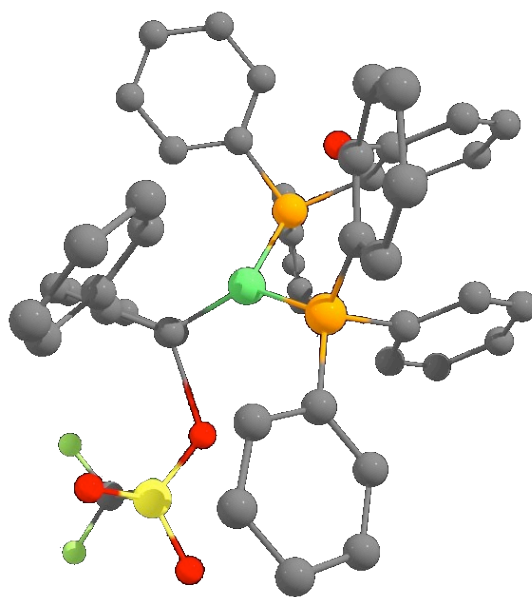

|    |             |            |             |
|----|-------------|------------|-------------|
| Ni | 1.53696499  | 1.69260698 | 0.00000000  |
| C  | -2.86000201 | 2.20959298 | -1.47861300 |
| C  | -1.87013401 | 2.46977898 | -0.52457200 |
| C  | -1.71826501 | 3.78245998 | -0.05005600 |
| C  | -2.54298801 | 4.81533498 | -0.49294400 |
| C  | -3.52956801 | 4.53388098 | -1.44210100 |
| C  | -3.68666401 | 3.23821198 | -1.93925800 |
| H  | -2.97475001 | 1.19759798 | -1.87003300 |
| H  | -2.40413801 | 5.82725698 | -0.11151500 |

|   |             |            |             |
|---|-------------|------------|-------------|
| H | -4.17605701 | 5.33951598 | -1.79767400 |
| H | -4.45140801 | 3.02607198 | -2.68900200 |
| O | -0.72244201 | 3.96046398 | 0.88478500  |
| C | 0.03455199  | 5.11397798 | 0.85721400  |
| C | 1.17542899  | 5.17744198 | 0.03645100  |
| C | -0.33534201 | 6.17319998 | 1.68557900  |
| C | 1.90061299  | 6.38054498 | 0.03324000  |
| C | 0.41270699  | 7.35233198 | 1.67633600  |
| H | -1.20961101 | 6.05359798 | 2.32770100  |
| C | 1.52167699  | 7.45902798 | 0.83475600  |
| H | 2.78940899  | 6.46266898 | -0.59146900 |
| H | 0.12588399  | 8.18401198 | 2.32370500  |
| H | 2.10948299  | 8.37892198 | 0.81206000  |
| P | 1.78507399  | 3.69249698 | -0.88610500 |
| P | -0.64831501 | 1.25341098 | 0.07950100  |
| C | 3.42055099  | 4.24683898 | -1.48718900 |
| C | 3.68646299  | 4.41754198 | -2.85180900 |
| C | 4.45135299  | 4.43740798 | -0.55437200 |
| C | 4.97451699  | 4.75422898 | -3.27498200 |
| H | 2.89970099  | 4.27118598 | -3.59194800 |
| C | 5.73077499  | 4.77966598 | -0.98065500 |
| H | 4.26486499  | 4.28638098 | 0.50494700  |
| C | 5.99840099  | 4.92786298 | -2.34403900 |
| H | 5.18016399  | 4.86006698 | -4.34250300 |
| H | 6.52902599  | 4.87848398 | -0.24383700 |
| H | 7.01167599  | 5.15509098 | -2.68115400 |
| C | 0.76500299  | 3.61244498 | -2.40714700 |
| C | 0.89499599  | 2.45296598 | -3.19120100 |
| C | -0.14607601 | 4.60176498 | -2.78968800 |
| C | 0.10882999  | 2.28038498 | -4.32936900 |
| H | 1.63584599  | 1.69842098 | -2.91233200 |
| C | -0.94528401 | 4.41957698 | -3.92198200 |
| H | -0.24213601 | 5.51185998 | -2.19667400 |
| C | -0.82367901 | 3.25970398 | -4.68951000 |
| H | 0.21908299  | 1.37752598 | -4.93446600 |



|   |             |             |             |
|---|-------------|-------------|-------------|
| H | -1.66921501 | 5.18831898  | -4.20083200 |
| H | -1.45208101 | 3.11842298  | -5.57192800 |
| C | -1.16703201 | -0.30682702 | -0.72971200 |
| C | -2.22338901 | -1.09207002 | -0.24426600 |
| C | -0.47298101 | -0.72176902 | -1.87632400 |
| C | -2.58497701 | -2.26831102 | -0.90504700 |
| H | -2.75903001 | -0.78747402 | 0.65683200  |
| C | -0.83842101 | -1.89522602 | -2.53865000 |
| H | 0.35785199  | -0.12099102 | -2.24699500 |
| C | -1.89550301 | -2.67042802 | -2.05323400 |
| H | -3.40616501 | -2.87653402 | -0.51841600 |
| H | -0.29019901 | -2.20905202 | -3.42995900 |
| H | -2.17787701 | -3.59299002 | -2.56591000 |
| C | -1.09425701 | 1.02840698  | 1.84422700  |
| C | -2.35416401 | 1.36402198  | 2.35994000  |
| C | -0.10945001 | 0.51452698  | 2.70252800  |
| C | -2.62763701 | 1.17875498  | 3.71737500  |
| H | -3.12003001 | 1.77975198  | 1.70170900  |
| C | -0.38799301 | 0.32766898  | 4.05733300  |
| H | 0.87673199  | 0.26099698  | 2.31281500  |
| C | -1.64627801 | 0.65991398  | 4.56755900  |
| H | -3.61067801 | 1.44466898  | 4.11363400  |
| H | 0.38766799  | -0.07116202 | 4.71497500  |
| H | -1.86141301 | 0.51990198  | 5.62960600  |
| C | 2.63467199  | -0.17917702 | 0.11108100  |
| C | 2.68296999  | -1.27589302 | 1.00244600  |
| C | 3.22563099  | -1.10598002 | 2.26656300  |
| C | 3.70324299  | 0.15816998  | 2.66980200  |
| C | 3.67168999  | 1.26959998  | 1.82553300  |
| C | 3.13229299  | 1.07444298  | 0.53509400  |
| H | 2.45774299  | -0.37022702 | -0.95045000 |
| H | 2.35072799  | -2.26055702 | 0.66514100  |
| H | 3.28406299  | -1.94831302 | 2.95911800  |
| H | 4.04880199  | 0.30154098  | 3.69723200  |
| O | 6.48235099  | 1.84198098  | 0.18520200  |

|   |            |             |             |
|---|------------|-------------|-------------|
| S | 5.87940299 | 1.36486698  | -1.06894400 |
| O | 4.37077099 | 1.50297098  | -1.11565700 |
| O | 6.52054199 | 1.73331198  | -2.33362900 |
| C | 3.95527399 | 2.63299898  | 2.34809100  |
| C | 2.87648199 | 3.51167798  | 2.54695000  |
| C | 5.25458999 | 3.06583098  | 2.64389400  |
| C | 3.09170999 | 4.81030098  | 3.01034300  |
| H | 1.86238199 | 3.16811098  | 2.33153100  |
| C | 5.46786699 | 4.36693798  | 3.10767400  |
| H | 6.09184599 | 2.39994398  | 2.43920000  |
| C | 4.39218699 | 5.24293398  | 3.28540600  |
| H | 2.24386899 | 5.48488698  | 3.14543900  |
| H | 6.48653799 | 4.70415298  | 3.31436900  |
| H | 4.56739699 | 6.26281598  | 3.63661100  |
| C | 6.08484599 | -0.49341002 | -0.97046600 |
| F | 7.35572199 | -0.83892002 | -1.17732200 |
| F | 5.32603999 | -1.10643502 | -1.88914600 |
| F | 5.71844999 | -0.94814902 | 0.23489600  |

**B3LYP (E<sub>h</sub>):** -5077.134578

**M06-L (E<sub>h</sub>):** -5080.034164

**G-E (E<sub>h</sub>):** 0.645091

**[(DPEphos)Ni(2-Ph-Ph)]<sup>+</sup> (B):**

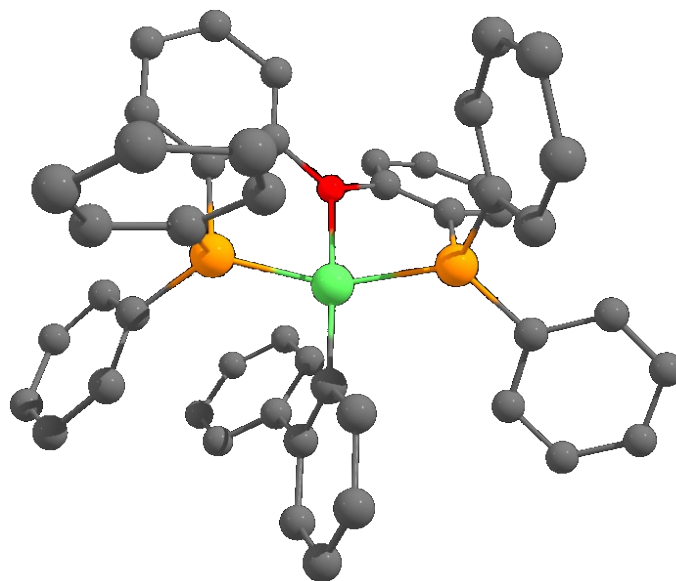

|   |             |             |             |
|---|-------------|-------------|-------------|
| C | -1.76017970 | 1.88429750  | -0.02304201 |
| C | -2.04013170 | 1.98400450  | -1.39714601 |
| H | -2.18242770 | 1.08042850  | -1.99355501 |
| C | -2.13940070 | 3.23925550  | -1.99983201 |
| H | -2.36488570 | 3.31044450  | -3.06616401 |
| C | -1.95087070 | 4.40029250  | -1.24277401 |
| H | -2.02805170 | 5.38116050  | -1.71680001 |
| C | -1.67209170 | 4.30375450  | 0.12384599  |
| H | -1.53181070 | 5.20836250  | 0.71940999  |
| C | -1.57483370 | 3.05173250  | 0.73403099  |
| H | -1.35792070 | 2.98664250  | 1.80177499  |
| C | -2.61216670 | -0.91448950 | 0.04947799  |
| C | -2.19744170 | -2.20934250 | -0.30149101 |
| H | -1.14482870 | -2.48612750 | -0.22942001 |
| C | -3.13405370 | -3.13452850 | -0.76748501 |
| H | -2.80913470 | -4.13956750 | -1.04418201 |
| C | -4.47762970 | -2.77083250 | -0.89036701 |
| H | -5.20696270 | -3.49557850 | -1.25907301 |
| C | -4.89138670 | -1.47703150 | -0.55252201 |
| H | -5.94049170 | -1.19218150 | -0.65755501 |
| C | -3.96262370 | -0.54666850 | -0.08596401 |
| H | -4.28303870 | 0.46781250  | 0.16239399  |
| C | -1.59459970 | 0.36733150  | 2.50035999  |
| C | -2.73402970 | -0.05101750 | 3.19608399  |

|   |             |             |             |
|---|-------------|-------------|-------------|
| H | -3.62069870 | -0.35708450 | 2.63820899  |
| C | -2.72982070 | -0.10998350 | 4.59275999  |
| H | -3.62408270 | -0.43708150 | 5.12614399  |
| C | -1.57159570 | 0.21790950  | 5.29997699  |
| H | -1.55305870 | 0.13876450  | 6.38884099  |
| C | -0.41587370 | 0.63225950  | 4.62701299  |
| H | 0.49674730  | 0.85354550  | 5.17873099  |
| C | -0.45187170 | 0.72775450  | 3.23952099  |
| C | 1.66602630  | 1.98367150  | 2.81538499  |
| C | 2.82647630  | 1.94292850  | 2.02286499  |
| C | 3.86864530  | 2.83355950  | 2.31518399  |
| H | 4.76803130  | 2.82130150  | 1.69576699  |
| C | 3.75540130  | 3.74523650  | 3.36447399  |
| H | 4.57466830  | 4.43169950  | 3.58494699  |
| C | 2.57263930  | 3.79732150  | 4.10716599  |
| H | 2.45942230  | 4.53262850  | 4.90648299  |
| C | 1.51695030  | 2.92265350  | 3.83580399  |
| H | 0.59239930  | 2.98798050  | 4.40659699  |
| C | 2.95979030  | 2.13152950  | -0.83521801 |
| C | 4.19357530  | 2.51076750  | -1.38336001 |
| H | 5.11561230  | 2.03123450  | -1.04960601 |
| C | 4.24114030  | 3.50068050  | -2.36831101 |
| H | 5.20273330  | 3.79108150  | -2.79719301 |
| C | 3.06464030  | 4.11732950  | -2.80397701 |
| H | 3.10750530  | 4.88997050  | -3.57485601 |
| C | 1.83360530  | 3.74265050  | -2.25596401 |
| H | 0.90968130  | 4.21758550  | -2.59191701 |
| C | 1.77874130  | 2.74902650  | -1.27903901 |
| H | 0.81601830  | 2.45474050  | -0.85718401 |
| C | 4.30804330  | -0.10634650 | 0.48962899  |
| C | 5.02824530  | -0.37578150 | 1.66170899  |
| H | 4.72685030  | 0.07543250  | 2.60840599  |
| C | 6.13115730  | -1.23088350 | 1.61867999  |
| H | 6.69122230  | -1.43698350 | 2.53318899  |
| C | 6.51558930  | -1.82123550 | 0.41235699  |

|    |             |             |             |
|----|-------------|-------------|-------------|
| H  | 7.38185730  | -2.48576850 | 0.38126199  |
| C  | 5.78807230  | -1.56623850 | -0.75501801 |
| H  | 6.08002830  | -2.03483950 | -1.69734501 |
| C  | 4.68195530  | -0.71807050 | -0.72023101 |
| H  | 4.10627530  | -0.53517750 | -1.62978501 |
| C  | 1.04098830  | -0.96167650 | -0.90334101 |
| C  | 0.69291330  | -0.53922550 | -2.19082001 |
| H  | 0.29706830  | 0.46651350  | -2.34874001 |
| C  | 0.86298230  | -1.38602450 | -3.29128701 |
| H  | 0.58558430  | -1.04152150 | -4.29057201 |
| C  | 1.38742630  | -2.66888950 | -3.10881201 |
| H  | 1.51411830  | -3.33857450 | -3.96218801 |
| C  | 1.75056130  | -3.09321550 | -1.83063701 |
| H  | 2.15505730  | -4.09801850 | -1.68689501 |
| C  | 1.58987630  | -2.25400350 | -0.71252401 |
| C  | 2.04146230  | -2.68591750 | 0.63555999  |
| C  | 3.24307030  | -3.39453150 | 0.80479999  |
| H  | 3.83255330  | -3.66511550 | -0.07162501 |
| C  | 3.72312130  | -3.70053650 | 2.07792699  |
| H  | 4.67054230  | -4.23367050 | 2.18143699  |
| C  | 3.01414030  | -3.30719250 | 3.21777999  |
| H  | 3.39826530  | -3.54054950 | 4.21320499  |
| C  | 1.80238530  | -2.62915650 | 3.06991399  |
| H  | 1.21692930  | -2.34458250 | 3.94773899  |
| C  | 1.31841730  | -2.33681650 | 1.79287599  |
| H  | 0.32745630  | -1.88516650 | 1.69370499  |
| Ni | 0.81852230  | 0.06939150  | 0.63984399  |
| O  | 0.66136130  | 1.07712350  | 2.46686799  |
| P  | -1.37821770 | 0.24736650  | 0.67741699  |
| P  | 2.80788930  | 0.90442950  | 0.50482699  |

**B3LYP (E<sub>h</sub>):** -4116.090958

**M06-L (E<sub>h</sub>):** -4118.201038

**G-E (E<sub>h</sub>):** 0.629707

## Thiol Coordination of HS-Ad (2b) to (DPEphos)Ni(2-Ph-Ph)(OAc)

Energies are given relative to the oxidative addition.

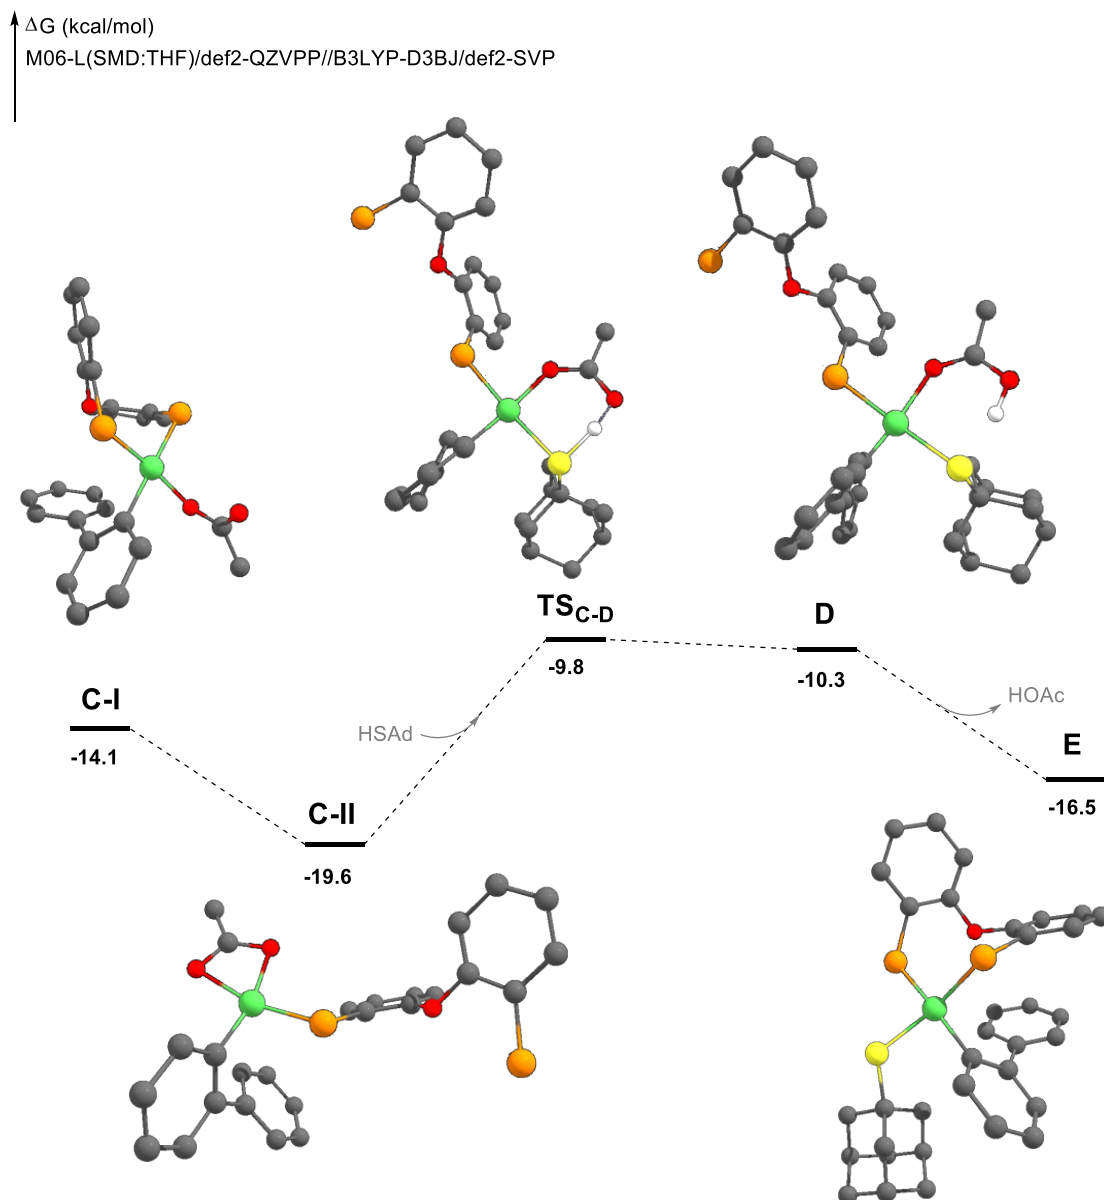

**(DPEphos)Ni(2-Ph-Ph)( $\eta^1$ -OAc) (C-I):**

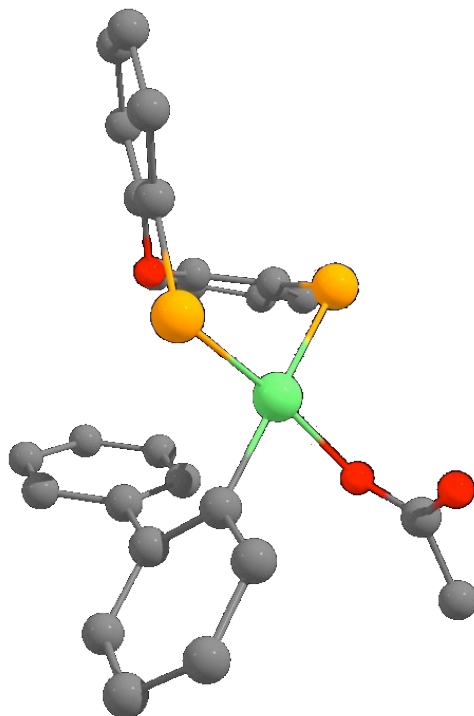

|    |            |             |             |
|----|------------|-------------|-------------|
| C  | 4.37190076 | 2.04958688  | 0.00000000  |
| C  | 3.08249976 | 1.96843188  | 0.53822500  |
| C  | 2.25806776 | 0.88882288  | 0.21397800  |
| C  | 2.74470276 | -0.11239012 | -0.62619500 |
| C  | 4.04210976 | -0.04418412 | -1.16393800 |
| C  | 4.86790676 | 1.06434088  | -0.86780500 |
| H  | 5.00280576 | 2.89299088  | 0.27702800  |
| H  | 2.72645676 | 2.75336888  | 1.21132600  |
| H  | 1.24824376 | 0.81672088  | 0.62604100  |
| H  | 2.12001776 | -0.97792712 | -0.86142600 |
| Ni | 6.66219776 | 1.14552088  | -1.59983200 |
| C  | 4.51227776 | -1.15000012 | -2.03814500 |
| C  | 3.70965676 | -1.62603112 | -3.08765700 |
| C  | 5.75391376 | -1.77090612 | -1.80434600 |
| C  | 4.13337176 | -2.69030912 | -3.88616900 |
| H  | 2.75419276 | -1.13940312 | -3.28894400 |
| C  | 6.16852576 | -2.84277612 | -2.59514600 |
| H  | 6.37016476 | -1.42780012 | -0.97206500 |
| C  | 5.36328276 | -3.30618012 | -3.63919000 |

|   |             |             |             |
|---|-------------|-------------|-------------|
| H | 3.49897976  | -3.03885012 | -4.70561400 |
| H | 7.13272976  | -3.31619912 | -2.39651100 |
| H | 5.69539376  | -4.14225812 | -4.25992300 |
| O | 7.23907076  | 0.26287488  | 0.07095000  |
| C | 7.22137676  | 1.02306188  | 1.11409000  |
| O | 7.25573176  | 2.25959688  | 1.08193600  |
| C | 7.16210676  | 0.27473088  | 2.43257200  |
| H | 6.15780376  | -0.16711112 | 2.53534600  |
| H | 7.88672876  | -0.55304112 | 2.43494800  |
| H | 7.34924476  | 0.95513588  | 3.27309200  |
| C | 6.83198876  | 3.58356488  | -5.55707100 |
| C | 6.63093076  | 2.39725188  | -4.84085000 |
| C | 7.13824376  | 1.20901588  | -5.38427400 |
| C | 7.77458476  | 1.17717288  | -6.62433200 |
| C | 7.94580476  | 2.36828188  | -7.32905200 |
| C | 7.48836376  | 3.57264488  | -6.78933800 |
| H | 6.49264276  | 4.53048788  | -5.13851500 |
| H | 8.14819676  | 0.22927488  | -7.01389800 |
| H | 8.45398676  | 2.35660588  | -8.29590000 |
| H | 7.64764176  | 4.51051988  | -7.32487000 |
| O | 6.94583276  | 0.06442388  | -4.64293200 |
| C | 7.98576476  | -0.81269612 | -4.42056200 |
| C | 8.92385976  | -0.55750512 | -3.39840900 |
| C | 8.00585076  | -1.99785412 | -5.15264700 |
| C | 9.81907576  | -1.59197512 | -3.07883800 |
| C | 8.94368076  | -2.98583412 | -4.85364400 |
| H | 7.24387976  | -2.14489012 | -5.91854400 |
| C | 9.83509176  | -2.78981812 | -3.79776900 |
| H | 10.50910376 | -1.46630312 | -2.24617400 |
| H | 8.95288976  | -3.91877912 | -5.42145100 |
| H | 10.54641376 | -3.57182812 | -3.52383300 |
| P | 8.82271676  | 1.01942188  | -2.44060800 |
| P | 5.73801076  | 2.27913588  | -3.22563800 |
| C | 10.28584876 | 1.02269388  | -1.31889100 |
| C | 11.56821276 | 0.69339188  | -1.79649300 |



|   |             |            |             |
|---|-------------|------------|-------------|
| C | 10.15500876 | 1.54147588 | -0.02493400 |
| C | 12.68446276 | 0.81412988 | -0.97028300 |
| H | 11.70528576 | 0.36346688 | -2.82717100 |
| C | 11.27980376 | 1.67090588 | 0.79726900  |
| H | 9.18855476  | 1.88906388 | 0.33536600  |
| C | 12.54117776 | 1.29379388 | 0.33661600  |
| H | 13.67250976 | 0.54728488 | -1.35324000 |
| H | 11.15880376 | 2.07791288 | 1.80394700  |
| H | 13.41666776 | 1.39149288 | 0.98329500  |
| C | 9.47207276  | 2.32945288 | -3.56654600 |
| C | 9.31411476  | 3.65417788 | -3.13151700 |
| C | 10.21698276 | 2.07195388 | -4.72193800 |
| C | 9.88681576  | 4.70561188 | -3.84553000 |
| H | 8.74093376  | 3.86444588 | -2.22760300 |
| C | 10.78818876 | 3.12706088 | -5.43818400 |
| H | 10.34702776 | 1.04571788 | -5.07027300 |
| C | 10.62675476 | 4.44410388 | -5.00274000 |
| H | 9.75081876  | 5.73203288 | -3.49691800 |
| H | 11.35972476 | 2.91624488 | -6.34532100 |
| H | 11.07466376 | 5.26626388 | -5.56586100 |
| C | 5.59111676  | 4.01336688 | -2.65453700 |
| C | 6.27622676  | 4.38434888 | -1.48639300 |
| C | 4.81146676  | 4.96611088 | -3.33022300 |
| C | 6.20869976  | 5.70060588 | -1.02283900 |
| H | 6.83204276  | 3.63979788 | -0.90764600 |
| C | 4.74746376  | 6.28018688 | -2.86345200 |
| H | 4.24151176  | 4.67558588 | -4.21489600 |
| C | 5.45173176  | 6.65073188 | -1.71275900 |
| H | 6.73882176  | 5.97326288 | -0.10755200 |
| H | 4.13910776  | 7.01587388 | -3.39504700 |
| H | 5.39589676  | 7.67862588 | -1.34600800 |
| C | 4.04188376  | 1.87045988 | -3.82059500 |
| C | 2.92669776  | 2.28957088 | -3.07740500 |
| C | 3.83829176  | 1.12396888 | -4.98982200 |
| C | 1.63671776  | 1.97030088 | -3.49921600 |

|   |            |            |             |
|---|------------|------------|-------------|
| H | 3.06435176 | 2.85163788 | -2.15460700 |
| C | 2.54450776 | 0.81004788 | -5.41226700 |
| H | 4.68464776 | 0.77049588 | -5.57551400 |
| C | 1.43988276 | 1.23055188 | -4.66906400 |
| H | 0.78294076 | 2.29453688 | -2.90030000 |
| H | 2.40432876 | 0.22480988 | -6.32409100 |
| H | 0.42825776 | 0.98053788 | -4.99794900 |

**B3LYP (E<sub>h</sub>):** -4344.621208

**M06-L (E<sub>h</sub>):** -4346.924598

**G-E (E<sub>h</sub>):** 0.677635

**(DPEphos)Ni(2-Ph-Ph)( $\eta^2$ -OAc) (C-II):**

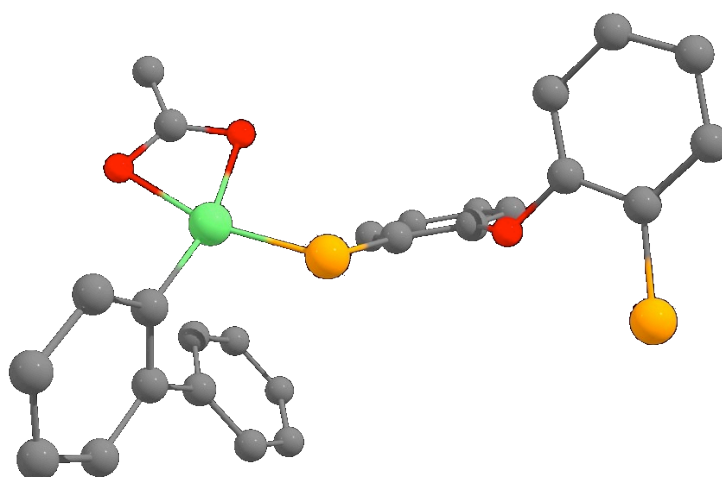

|    |             |             |             |
|----|-------------|-------------|-------------|
| C  | -3.75075700 | 1.55583000  | -2.36091100 |
| C  | -3.98235600 | 2.89899300  | -2.67926600 |
| C  | -4.28661500 | 3.81360100  | -1.66536400 |
| C  | -4.37033400 | 3.37767200  | -0.34168200 |
| C  | -4.14635500 | 2.03025500  | -0.01627100 |
| C  | -3.82036700 | 1.10848500  | -1.03410300 |
| H  | -3.48940300 | 0.85436500  | -3.15907300 |
| H  | -3.92059400 | 3.23255400  | -3.71891300 |
| H  | -4.46760300 | 4.86391600  | -1.90735900 |
| H  | -4.62185600 | 4.08555000  | 0.45270200  |
| Ni | -3.51030300 | -0.68746700 | -0.62430800 |
| C  | -4.18482000 | 1.55986800  | 1.39069100  |

|   |             |             |             |
|---|-------------|-------------|-------------|
| C | -3.48782300 | 2.23797700  | 2.40275800  |
| C | -4.87231400 | 0.37668000  | 1.72571600  |
| C | -3.45142000 | 1.73605300  | 3.70575400  |
| H | -2.93108200 | 3.14211800  | 2.15068600  |
| C | -4.84086900 | -0.12054200 | 3.03008800  |
| H | -5.45527500 | -0.13547000 | 0.95746800  |
| C | -4.12204600 | 0.55173400  | 4.02366600  |
| H | -2.88168400 | 2.26584400  | 4.47332900  |
| H | -5.38461000 | -1.03725100 | 3.27298800  |
| H | -4.08853000 | 0.15677200  | 5.04195200  |
| O | -3.61449200 | -2.73874200 | -0.42835400 |
| C | -4.81561300 | -2.67315800 | -0.84619500 |
| O | -5.29364000 | -1.53964300 | -1.14892000 |
| C | -5.66077600 | -3.91450700 | -0.93870800 |
| H | -5.03033200 | -4.79244100 | -1.13316600 |
| H | -6.17038000 | -4.06652800 | 0.02702600  |
| H | -6.42797900 | -3.79990800 | -1.71580900 |
| C | 4.75241100  | -2.04080300 | -0.59109600 |
| C | 3.70685600  | -1.34176600 | 0.03335100  |
| C | 2.42103100  | -1.90255600 | -0.02133200 |
| C | 2.17022300  | -3.11010200 | -0.67640100 |
| C | 3.22552000  | -3.78397700 | -1.29030400 |
| C | 4.51811200  | -3.25172100 | -1.24636500 |
| H | 5.76313200  | -1.63061300 | -0.55522000 |
| H | 1.15212000  | -3.49887500 | -0.71305500 |
| H | 3.03384300  | -4.72472900 | -1.81141400 |
| H | 5.34580000  | -3.77891700 | -1.72617200 |
| O | 1.39208500  | -1.17964200 | 0.54047600  |
| C | 0.46372400  | -1.80526100 | 1.32892500  |
| C | -0.88541400 | -1.45224700 | 1.15922800  |
| C | 0.85114400  | -2.70770900 | 2.32394300  |
| C | -1.83979000 | -2.00379300 | 2.02718900  |
| C | -0.11540600 | -3.25023000 | 3.17157500  |
| H | 1.90645000  | -2.96306000 | 2.43155200  |
| C | -1.46014400 | -2.89353700 | 3.03153400  |

|   |             |             |             |
|---|-------------|-------------|-------------|
| H | -2.88686100 | -1.73192500 | 1.90312500  |
| H | 0.18863200  | -3.94969500 | 3.95404800  |
| H | -2.21535300 | -3.31289100 | 3.69905300  |
| P | -1.43512700 | -0.30717500 | -0.15669900 |
| P | 3.88238100  | 0.27384100  | 0.92453000  |
| C | -0.83120100 | 1.33212200  | 0.38191800  |
| C | -1.00882500 | 2.45068000  | -0.44839800 |
| C | -0.29235100 | 1.51125700  | 1.66464000  |
| C | -0.67656500 | 3.72535600  | 0.00933100  |
| H | -1.43577000 | 2.33455700  | -1.44383700 |
| C | 0.04568500  | 2.78825700  | 2.11631600  |
| H | -0.15313000 | 0.65610900  | 2.32528900  |
| C | -0.15600400 | 3.90007600  | 1.29477500  |
| H | -0.84284000 | 4.58618200  | -0.64161600 |
| H | 0.45911400  | 2.91195100  | 3.11979800  |
| H | 0.09534700  | 4.90096500  | 1.65426500  |
| C | -0.49232900 | -0.78845200 | -1.65170000 |
| C | -0.89108400 | -1.98366300 | -2.27629700 |
| C | 0.57464100  | -0.04926700 | -2.17682500 |
| C | -0.21491600 | -2.43731400 | -3.40993300 |
| H | -1.72269000 | -2.56040100 | -1.86302000 |
| C | 1.23664800  | -0.50482000 | -3.31934700 |
| H | 0.90834400  | 0.86484000  | -1.68521400 |
| C | 0.84762200  | -1.69662700 | -3.93544400 |
| H | -0.52319400 | -3.37125500 | -3.88608800 |
| H | 2.06980300  | 0.07464700  | -3.71784400 |
| H | 1.37546700  | -2.04984600 | -4.82450800 |
| C | 5.72253500  | 0.37809400  | 1.06541600  |
| C | 6.34757900  | -0.49873800 | 1.97184700  |
| C | 6.51207000  | 1.32461500  | 0.39592100  |
| C | 7.72580400  | -0.45125300 | 2.17901900  |
| H | 5.74505400  | -1.23248000 | 2.51522800  |
| C | 7.89274100  | 1.38206600  | 0.61546800  |
| H | 6.05015300  | 2.02174000  | -0.30452600 |
| C | 8.50486400  | 0.49296200  | 1.50067600  |

|   |            |             |             |
|---|------------|-------------|-------------|
| H | 8.19425100 | -1.14812700 | 2.87857900  |
| H | 8.49229300 | 2.12642100  | 0.08526200  |
| H | 9.58388900 | 0.53662300  | 1.66691100  |
| C | 3.53890100 | 1.43469300  | -0.47471800 |
| C | 3.96092000 | 1.19359600  | -1.79286600 |
| C | 2.82368600 | 2.60710700  | -0.19558900 |
| C | 3.68427200 | 2.11385500  | -2.80456000 |
| H | 4.50368700 | 0.27663200  | -2.02916600 |
| C | 2.54005400 | 3.52634500  | -1.21031300 |
| H | 2.46939200 | 2.79244400  | 0.81952700  |
| C | 2.96945000 | 3.28201700  | -2.51600100 |
| H | 4.02228400 | 1.91776800  | -3.82542700 |
| H | 1.97309200 | 4.42908500  | -0.97750900 |
| H | 2.74507400 | 3.99742900  | -3.31083900 |

**B3LYP (E<sub>h</sub>):** -4344.609927

**M06-L (E<sub>h</sub>):** -4346.925655

**G-E (E<sub>h</sub>):** 0.669851

**(DPEphos)Ni(2-Ph-Ph)(HSAd)(OAc) (TS<sub>C-D</sub>):**

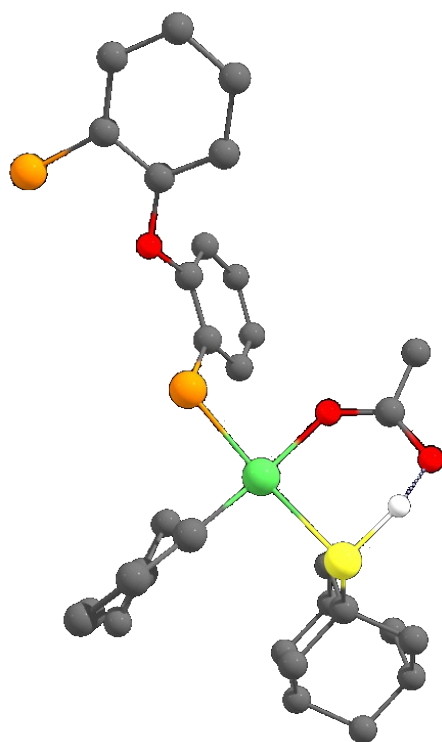

|   |             |             |             |
|---|-------------|-------------|-------------|
| C | -1.10139864 | 1.74825172  | 0.00000000  |
| C | -2.15686564 | 2.51811372  | -0.51377300 |
| C | -3.46274464 | 2.03664872  | -0.33799700 |
| C | -3.72767664 | 0.83935872  | 0.32792200  |
| C | -2.66232164 | 0.09095372  | 0.82913300  |
| C | -1.34936864 | 0.54373072  | 0.66327300  |
| H | -0.07512864 | 2.09719672  | -0.12650400 |
| H | -4.76200664 | 0.51995572  | 0.46241300  |
| H | -2.86036064 | -0.84361928 | 1.35886300  |
| H | -0.51436764 | -0.04052728 | 1.05663300  |
| O | -4.49754864 | 2.82917372  | -0.78818300 |
| C | -5.44346764 | 2.30036372  | -1.62242100 |
| C | -6.78321064 | 2.66180972  | -1.41222000 |
| C | -5.07268164 | 1.48202272  | -2.69637400 |
| C | -7.74193564 | 2.21632772  | -2.33797400 |
| C | -6.04448864 | 1.04104472  | -3.59220800 |
| H | -4.02204164 | 1.21812072  | -2.82545000 |
| C | -7.38172764 | 1.41794672  | -3.42240800 |
| H | -8.78710364 | 2.48123672  | -2.18628900 |
| H | -5.75359764 | 0.41047972  | -4.43572800 |
| H | -8.14416164 | 1.08241472  | -4.12840900 |

|   |             |            |             |
|---|-------------|------------|-------------|
| P | -7.31822864 | 3.69771172 | 0.00781800  |
| P | -1.98542164 | 4.12815472 | -1.41501900 |
| C | -6.72082064 | 5.36744872 | -0.44144100 |
| C | -6.76312064 | 6.40417872 | 0.50444500  |
| C | -6.36380164 | 5.66663972 | -1.76556800 |
| C | -6.47994964 | 7.71518472 | 0.12405600  |
| H | -7.04587964 | 6.19682072 | 1.53560000  |
| C | -6.07884964 | 6.98037872 | -2.14142400 |
| H | -6.32409464 | 4.87526472 | -2.51421900 |
| C | -6.14726164 | 8.01024172 | -1.20003000 |
| H | -6.54004664 | 8.51037472 | 0.86994600  |
| H | -5.81340064 | 7.19856572 | -3.17834500 |
| H | -5.93978664 | 9.04076172 | -1.49862800 |
| C | -6.33315664 | 3.15593572 | 1.45741500  |
| C | -6.77861564 | 2.01392372 | 2.14366000  |
| C | -5.18426164 | 3.82433872 | 1.90294500  |
| C | -6.07225164 | 1.53619172 | 3.24953800  |
| H | -7.67613464 | 1.49903572 | 1.80012800  |
| C | -4.48952164 | 3.34841372 | 3.01590900  |
| H | -4.81433164 | 4.69960772 | 1.36964600  |
| H | -6.42420664 | 0.64366472 | 3.77247200  |
| H | -3.59314864 | 3.87373272 | 3.34733800  |
| C | -0.15084264 | 4.20095972 | -1.62626900 |
| C | 0.41437036  | 3.34938072 | -2.59385900 |
| C | 0.68979736  | 5.09422872 | -0.94588900 |
| C | 1.78514036  | 3.36745672 | -2.85048400 |
| H | -0.22955464 | 2.65976272 | -3.14757800 |
| C | 2.06243736  | 5.12329772 | -1.21496200 |
| H | 0.27412736  | 5.77207872 | -0.19915300 |
| C | 2.61545536  | 4.25812972 | -2.16092200 |
| H | 2.20706136  | 2.69083972 | -3.59787500 |
| H | 2.70255036  | 5.82662072 | -0.67627200 |
| H | 3.68843736  | 4.27983572 | -2.36604100 |
| C | -2.26303564 | 5.29099772 | -0.00466400 |
| C | -1.81100364 | 5.02868072 | 1.29970000  |

|    |              |             |             |
|----|--------------|-------------|-------------|
| C  | -2.95354964  | 6.48434472  | -0.25718800 |
| C  | -2.03135264  | 5.94997472  | 2.32421300  |
| H  | -1.28739864  | 4.09507472  | 1.51382500  |
| C  | -3.17438864  | 7.40722672  | 0.76967500  |
| H  | -3.33702264  | 6.68559672  | -1.25939600 |
| C  | -2.71498664  | 7.14228972  | 2.06096200  |
| H  | -1.67101164  | 5.73747872  | 3.33409000  |
| H  | -3.71808564  | 8.32857472  | 0.55821500  |
| H  | -2.89290964  | 7.86073172  | 2.86474100  |
| Ni | -9.48342864  | 3.37045272  | 0.51883900  |
| C  | -9.58871164  | 5.14512772  | 1.14437100  |
| C  | -9.28314764  | 5.24784672  | 2.51536100  |
| C  | -9.90977164  | 6.33132172  | 0.43830600  |
| C  | -9.26076964  | 6.47048572  | 3.18595300  |
| C  | -9.87857464  | 7.56138372  | 1.13141900  |
| C  | -9.55709964  | 7.64201972  | 2.48260900  |
| H  | -9.04869964  | 4.34106272  | 3.08063300  |
| H  | -9.01125964  | 6.50846872  | 4.24980400  |
| H  | -10.07495764 | 8.48527072  | 0.58489300  |
| H  | -9.53273064  | 8.61370272  | 2.98204400  |
| O  | -10.94906664 | 0.25864172  | 0.68417900  |
| C  | -9.81393464  | 0.38436772  | 0.12984300  |
| O  | -9.18064564  | 1.46653972  | 0.02205400  |
| C  | -9.15380564  | -0.85753728 | -0.42245400 |
| H  | -8.33349764  | -1.14837728 | 0.25388400  |
| H  | -8.70443564  | -0.63368728 | -1.40061400 |
| H  | -9.86938464  | -1.68576028 | -0.49509900 |
| C  | -10.25020464 | 6.35392172  | -1.01234500 |
| C  | -11.04089064 | 7.38274172  | -1.56426400 |
| C  | -9.79387564  | 5.36379672  | -1.89788300 |
| C  | -11.32921664 | 7.42895072  | -2.92851300 |
| H  | -11.46049464 | 8.14968772  | -0.91200700 |
| C  | -10.07327864 | 5.40366672  | -3.26271200 |
| H  | -9.21230764  | 4.53873872  | -1.49650000 |
| C  | -10.84039164 | 6.44357272  | -3.79177800 |



|   |              |            |             |
|---|--------------|------------|-------------|
| H | -11.95309464 | 8.23683672 | -3.31889300 |
| H | -9.68655664  | 4.61441372 | -3.91261300 |
| H | -11.06794464 | 6.47952072 | -4.85960600 |
| C | -13.23328064 | 4.70166672 | 0.20536700  |
| H | -13.57449164 | 4.96798372 | 1.21873900  |
| H | -12.36442164 | 5.33220572 | -0.01881100 |
| C | -14.35065564 | 4.94537272 | -0.82457300 |
| H | -14.63320164 | 6.01121172 | -0.80222200 |
| C | -12.81776664 | 3.22203172 | 0.18107400  |
| C | -14.03710364 | 2.34774372 | 0.53052900  |
| H | -14.38691564 | 2.59092272 | 1.54699200  |
| H | -13.74445464 | 1.28516972 | 0.53036300  |
| C | -15.56819664 | 4.07390972 | -0.47282500 |
| H | -16.38550364 | 4.25234272 | -1.19257700 |
| H | -15.95197964 | 4.34379272 | 0.52578500  |
| C | -15.16003164 | 2.59041172 | -0.49695000 |
| H | -16.02722664 | 1.96072872 | -0.23595800 |
| C | -14.65455664 | 2.21990972 | -1.90250800 |
| H | -14.37846664 | 1.15203672 | -1.93514900 |
| H | -15.45734364 | 2.36987072 | -2.64457600 |
| C | -13.83954564 | 4.57686672 | -2.22789300 |
| H | -12.97701764 | 5.20611472 | -2.49242300 |
| H | -14.62512464 | 4.76865872 | -2.97917400 |
| C | -12.32088264 | 2.84729772 | -1.22493000 |
| H | -11.44017364 | 3.45545872 | -1.47276600 |
| H | -12.01512964 | 1.78973772 | -1.23897500 |
| C | -13.43790364 | 3.09243172 | -2.25523600 |
| H | -13.06472764 | 2.82746572 | -3.25910800 |
| S | -11.51048364 | 2.93368872 | 1.46677100  |
| H | -11.28771664 | 1.38337572 | 1.10819000  |
| C | -4.92692464  | 2.20451972 | 3.68908800  |
| H | -4.37439964  | 1.83481672 | 4.55618100  |

**B3LYP (E<sub>h</sub>):** -5133.229817

**M06-L (E<sub>h</sub>):** -5135.987510

G-E ( $E_h$ ): 0.902105

**(DPEphos)Ni(2-Ph-Ph)(SAd)(HOAc) (D):**

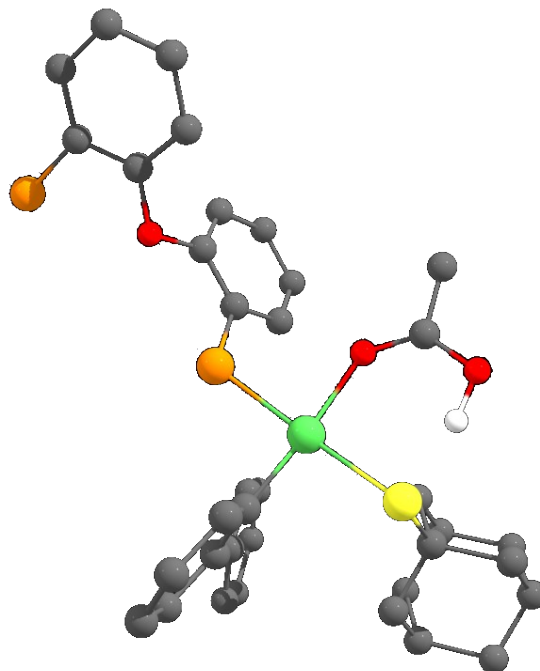

|   |             |             |             |
|---|-------------|-------------|-------------|
| C | -2.11538470 | 0.69930069  | 0.00000000  |
| C | -3.16821270 | 1.46564869  | -0.52383100 |
| C | -4.47681670 | 1.00239069  | -0.32264100 |
| C | -4.74816470 | -0.17207331 | 0.37955600  |
| C | -3.68539070 | -0.91842631 | 0.89002300  |
| C | -2.36968270 | -0.48446531 | 0.69779300  |
| H | -1.08694070 | 1.03459469  | -0.14445600 |
| H | -5.78498270 | -0.47429931 | 0.53422300  |
| H | -3.88719070 | -1.83574331 | 1.44775900  |
| H | -1.53686070 | -1.06668331 | 1.09876300  |
| O | -5.50911270 | 1.79214869  | -0.78433300 |
| C | -6.43205470 | 1.26901969  | -1.64634400 |
| C | -7.77320370 | 1.65110969  | -1.48501900 |
| C | -6.03630570 | 0.43706569  | -2.70100500 |
| C | -8.70316670 | 1.21884269  | -2.44594600 |
| C | -6.98156670 | 0.00744169  | -3.63012600 |
| H | -4.98618270 | 0.15579669  | -2.79115400 |
| C | -8.31712870 | 0.40960169  | -3.51345500 |

|   |             |             |             |
|---|-------------|-------------|-------------|
| H | -9.74833370 | 1.50516769  | -2.33714900 |
| H | -6.67012170 | -0.63248631 | -4.45915500 |
| H | -9.05779770 | 0.08633169  | -4.24780900 |
| P | -8.35574170 | 2.69693369  | -0.08956800 |
| P | -2.99443370 | 3.04944569  | -1.47003600 |
| C | -7.76470470 | 4.36630169  | -0.54892600 |
| C | -7.82152070 | 5.41177969  | 0.38651000  |
| C | -7.39724370 | 4.65452369  | -1.87278600 |
| C | -7.54169370 | 6.72052369  | -0.00438700 |
| H | -8.11071670 | 5.21249369  | 1.41742600  |
| C | -7.11540070 | 5.96603669  | -2.25875000 |
| H | -7.34535070 | 3.85589269  | -2.61305100 |
| C | -7.19799370 | 7.00461869  | -1.32803900 |
| H | -7.61252070 | 7.52245369  | 0.73335800  |
| H | -6.84117970 | 6.17568369  | -3.29520200 |
| H | -6.99301070 | 8.03329569  | -1.63465600 |
| C | -7.40118770 | 2.18886269  | 1.39226200  |
| C | -7.88157070 | 1.08265669  | 2.11213900  |
| C | -6.24829270 | 2.85139969  | 1.83585700  |
| C | -7.20400370 | 0.62939869  | 3.24609200  |
| H | -8.78973870 | 0.57867169  | 1.77996300  |
| C | -5.58199370 | 2.40188569  | 2.97660900  |
| H | -5.85486070 | 3.70205769  | 1.28008300  |
| H | -7.58444970 | -0.23495231 | 3.79565400  |
| H | -4.68194970 | 2.92217669  | 3.30629400  |
| C | -1.15828970 | 3.12575369  | -1.66377300 |
| C | -0.58168770 | 2.26425469  | -2.61564400 |
| C | -0.32615270 | 4.02677569  | -0.98315300 |
| C | 0.79204530  | 2.28033269  | -2.85654000 |
| H | -1.21910970 | 1.56899369  | -3.16986700 |
| C | 1.04940930  | 4.05386969  | -1.23673500 |
| H | -0.75097470 | 4.71229969  | -0.24868300 |
| C | 1.61371230  | 3.17890669  | -2.16698600 |
| H | 1.22295130  | 1.59627069  | -3.59191900 |
| H | 1.68293030  | 4.76345669  | -0.69848700 |

|    |              |             |             |
|----|--------------|-------------|-------------|
| H  | 2.68894630   | 3.19931869  | -2.36008900 |
| C  | -3.29623970  | 4.24920869  | -0.09649500 |
| C  | -2.86758270  | 4.02092469  | 1.22210200  |
| C  | -3.98388770  | 5.43449469  | -0.39187600 |
| C  | -3.10793370  | 4.96761369  | 2.21869400  |
| H  | -2.34656170  | 3.09405869  | 1.46942100  |
| C  | -4.22445970  | 6.38275369  | 0.60693800  |
| H  | -4.34952370  | 5.60994669  | -1.40559300 |
| C  | -3.78841770  | 6.15139269  | 1.91276100  |
| H  | -2.76565370  | 4.78164469  | 3.24001000  |
| H  | -4.76582270  | 7.29711769  | 0.36240100  |
| H  | -3.98251970  | 6.88951369  | 2.69464000  |
| Ni | -10.52825370 | 2.35019969  | 0.41132000  |
| C  | -10.62872170 | 4.10639769  | 1.07317100  |
| C  | -10.29717670 | 4.20398669  | 2.43834900  |
| C  | -10.96441970 | 5.29464169  | 0.37758900  |
| C  | -10.26431970 | 5.42441369  | 3.11206700  |
| C  | -10.92392970 | 6.52232869  | 1.07445300  |
| C  | -10.57719170 | 6.59851169  | 2.41958400  |
| H  | -10.05290070 | 3.29551469  | 2.99582800  |
| H  | -9.99503370  | 5.45877669  | 4.17123700  |
| H  | -11.13331970 | 7.44725269  | 0.53430300  |
| H  | -10.54611870 | 7.56808769  | 2.92274500  |
| O  | -11.89927370 | -0.82559531 | 0.63154400  |
| C  | -10.79894370 | -0.65303831 | -0.01879000 |
| O  | -10.23442070 | 0.44462769  | -0.16479000 |
| C  | -10.16445670 | -1.88937231 | -0.59791700 |
| H  | -9.44518970  | -2.28571631 | 0.13789700  |
| H  | -9.60811270  | -1.63028431 | -1.50843800 |
| H  | -10.91829270 | -2.66263531 | -0.79351000 |
| C  | -11.33120370 | 5.32095869  | -1.06602500 |
| C  | -12.14989870 | 6.33958469  | -1.59534500 |
| C  | -10.87463570 | 4.34453569  | -1.96672500 |
| C  | -12.46712070 | 6.38862469  | -2.95299600 |
| H  | -12.56941970 | 7.09436769  | -0.92890400 |

|   |              |            |             |
|---|--------------|------------|-------------|
| C | -11.18275070 | 4.38791069 | -3.32534700 |
| H | -10.26895470 | 3.52802569 | -1.58254800 |
| C | -11.97918070 | 5.41683569 | -3.83205300 |
| H | -13.11318070 | 7.18743969 | -3.32559100 |
| H | -10.79571270 | 3.61007469 | -3.98879200 |
| H | -12.22974170 | 5.45457169 | -4.89466700 |
| C | -14.28138170 | 3.63261869 | 0.15756900  |
| H | -14.60377370 | 3.90424469 | 1.17545200  |
| H | -13.42377570 | 4.27008869 | -0.08839900 |
| C | -15.42120070 | 3.85648869 | -0.85180700 |
| H | -15.71531570 | 4.91944869 | -0.83380800 |
| C | -13.84506070 | 2.15758069 | 0.14324500  |
| C | -15.05139970 | 1.27563369 | 0.52011400  |
| H | -15.38313070 | 1.52280569 | 1.54167900  |
| H | -14.74942170 | 0.21524069 | 0.52380700  |
| C | -16.62198570 | 2.97543069 | -0.46836400 |
| H | -17.45573870 | 3.13759169 | -1.17320500 |
| H | -16.98856270 | 3.25056569 | 0.53526500  |
| C | -16.19759270 | 1.49646269 | -0.48633500 |
| H | -17.05294970 | 0.85992369 | -0.20305900 |
| C | -15.71636570 | 1.11881869 | -1.89851600 |
| H | -15.42956970 | 0.05341469 | -1.92734000 |
| H | -16.53519070 | 1.25326969 | -2.62604500 |
| C | -14.93390970 | 3.48081569 | -2.26153200 |
| H | -14.08341870 | 4.11698369 | -2.54818200 |
| H | -15.73575070 | 3.65660969 | -2.99964000 |
| C | -13.37715270 | 1.77707769 | -1.27187500 |
| H | -12.50645870 | 2.39000069 | -1.54356900 |
| H | -13.06181670 | 0.72173269 | -1.28633100 |
| C | -14.51617770 | 2.00073469 | -2.28292300 |
| H | -14.16051470 | 1.73031569 | -3.29194800 |
| S | -12.51448270 | 1.89431069 | 1.40780200  |
| H | -12.22198070 | 0.13833669 | 1.00907400  |
| C | -6.05256370  | 1.29013769 | 3.68101700  |
| H | -5.52245670  | 0.94098169 | 4.57033100  |

B3LYP (E<sub>h</sub>): -5133.229474

M06-L (E<sub>h</sub>): -5135.988262

G-E (E<sub>h</sub>): 0.901738

(DPEphos)Ni(2-Ph-Ph)(SAd) (E):

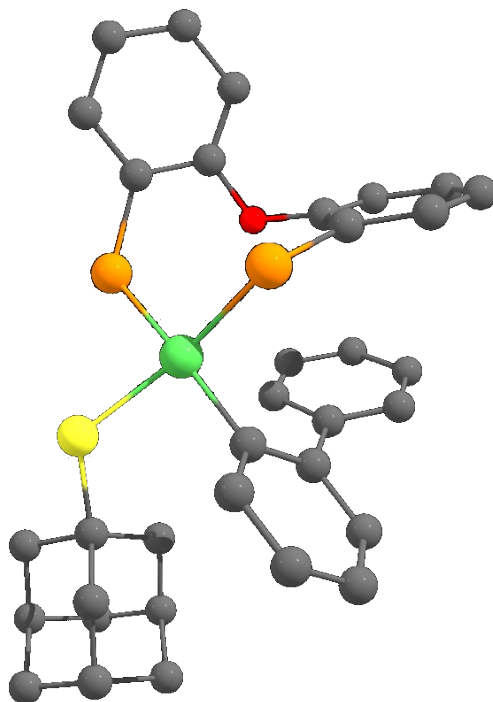

|    |             |            |             |
|----|-------------|------------|-------------|
| C  | 0.02479339  | 3.58677704 | 0.00000000  |
| C  | 0.65087939  | 2.34164504 | -0.06725000 |
| C  | 0.88245539  | 1.61626804 | 1.10563100  |
| C  | 0.44461439  | 2.13181804 | 2.32381900  |
| C  | -0.22273261 | 3.37182704 | 2.39643400  |
| C  | -0.40966461 | 4.13682504 | 1.21736200  |
| H  | -0.12488161 | 4.15592404 | -0.92029100 |
| H  | 0.97326139  | 1.94476404 | -1.03349100 |
| H  | 1.39883139  | 0.65373604 | 1.07108200  |
| H  | 0.62746439  | 1.57204004 | 3.24466100  |
| Ni | -1.32832061 | 5.83656904 | 1.27147100  |
| C  | -4.75899761 | 9.15205604 | 1.25246900  |
| C  | -3.98376961 | 8.22762004 | 1.96445800  |
| C  | -4.63904961 | 7.36055204 | 2.85078300  |
| C  | -6.01787161 | 7.42216504 | 3.05364300  |
| C  | -6.76848361 | 8.35814304 | 2.33965600  |

|   |             |             |             |
|---|-------------|-------------|-------------|
| C | -6.14265361 | 9.21595204  | 1.43339700  |
| H | -4.27495661 | 9.82006304  | 0.54017600  |
| H | -6.49596961 | 6.73412104  | 3.75105400  |
| H | -7.84962461 | 8.40745904  | 2.48848500  |
| H | -6.73060061 | 9.93616004  | 0.86091600  |
| O | -3.83514661 | 6.46096004  | 3.52199100  |
| C | -4.32406061 | 5.18505604  | 3.69725200  |
| C | -4.24710161 | 4.26815404  | 2.63388000  |
| C | -4.89212561 | 4.84423904  | 4.92259600  |
| C | -4.85087661 | 3.01324904  | 2.81947300  |
| C | -5.45084961 | 3.57801304  | 5.09571000  |
| H | -4.88847961 | 5.58598204  | 5.72183500  |
| C | -5.44944761 | 2.67135504  | 4.03362900  |
| H | -4.84397161 | 2.28824104  | 2.00688100  |
| H | -5.89602261 | 3.30565004  | 6.05519900  |
| H | -5.90738161 | 1.68671104  | 4.14987300  |
| P | -3.27364361 | 4.71417404  | 1.12621500  |
| P | -2.16883861 | 8.00508304  | 1.74703500  |
| C | -3.16465461 | 3.11157204  | 0.22407800  |
| C | -3.46162961 | 3.03204004  | -1.14356700 |
| C | -2.65934261 | 1.97319104  | 0.87439300  |
| C | -3.24825561 | 1.84234104  | -1.84666200 |
| H | -3.85488661 | 3.90005204  | -1.67250500 |
| C | -2.45301361 | 0.78784304  | 0.17324100  |
| H | -2.40195861 | 2.01703604  | 1.93036800  |
| C | -2.74300461 | 0.71815104  | -1.19264000 |
| H | -3.48036061 | 1.79968104  | -2.91355100 |
| H | -2.04300161 | -0.07880696 | 0.69572700  |
| H | -2.57112261 | -0.20880996 | -1.74488600 |
| C | -4.43655961 | 5.65830904  | 0.06141900  |
| C | -3.87631661 | 6.42778804  | -0.96942500 |
| C | -5.82668261 | 5.62709504  | 0.21752000  |
| C | -4.69240661 | 7.15781804  | -1.83307600 |
| H | -2.79122861 | 6.45075504  | -1.08484200 |
| C | -6.64327461 | 6.36628904  | -0.64144100 |

|   |             |             |             |
|---|-------------|-------------|-------------|
| H | -6.27111161 | 5.03598604  | 1.02006600  |
| C | -6.07996761 | 7.13079404  | -1.66672000 |
| H | -4.24202861 | 7.75977804  | -2.62552000 |
| H | -7.72678661 | 6.35088804  | -0.50281500 |
| H | -6.72293761 | 7.71198504  | -2.33192700 |
| C | -1.77044961 | 9.38277504  | 0.59881200  |
| C | -1.76388861 | 10.71106904 | 1.05145400  |
| C | -1.51123861 | 9.12082904  | -0.75401600 |
| C | -1.52203561 | 11.76011704 | 0.16200300  |
| H | -1.94888661 | 10.92580004 | 2.10574300  |
| C | -1.27112461 | 10.17045004 | -1.64274200 |
| H | -1.45944861 | 8.09195104  | -1.10753200 |
| C | -1.27921261 | 11.49198804 | -1.18827300 |
| H | -1.51915061 | 12.79020004 | 0.52662100  |
| H | -1.06039961 | 9.95192904  | -2.69227800 |
| H | -1.08590361 | 12.31233204 | -1.88383800 |
| C | -1.51170461 | 8.62921604  | 3.36035700  |
| C | -2.34235361 | 9.05653304  | 4.40636500  |
| C | -0.11943361 | 8.67064504  | 3.53826000  |
| C | -1.79058661 | 9.49527404  | 5.61365900  |
| H | -3.42539861 | 9.05338504  | 4.28896000  |
| C | 0.42806639  | 9.10635804  | 4.74494100  |
| H | 0.51964539  | 8.34882304  | 2.71395100  |
| C | -0.40517161 | 9.51538104  | 5.79070500  |
| H | -2.45191861 | 9.82126504  | 6.42026500  |
| H | 1.51393239  | 9.12212704  | 4.86684800  |
| H | 0.02329139  | 9.85215604  | 6.73780800  |
| C | -0.76671161 | 3.82350404  | 3.70537200  |
| C | -1.36077961 | 2.90665804  | 4.59410100  |
| C | -0.72922561 | 5.17558004  | 4.08982900  |
| C | -1.88385961 | 3.32467904  | 5.81826800  |
| H | -1.43033261 | 1.85387904  | 4.31131100  |
| C | -1.25086361 | 5.59815704  | 5.31222900  |
| H | -0.26127661 | 5.90148604  | 3.42646600  |
| C | -1.82645961 | 4.67254004  | 6.18523600  |



|   |             |            |             |
|---|-------------|------------|-------------|
| H | -2.35244561 | 2.59477704 | 6.48306500  |
| H | -1.20342561 | 6.65517604 | 5.57713500  |
| H | -2.23752261 | 5.00031604 | 7.14333400  |
| S | 0.52815139  | 6.96380504 | 0.59450300  |
| C | 2.24669639  | 6.43224204 | 1.07754400  |
| C | 4.30802739  | 5.12773804 | 0.41362900  |
| C | 3.09216439  | 7.72590904 | 1.05424100  |
| C | 2.32944039  | 5.82247504 | 2.48499300  |
| H | 4.71121039  | 4.41237904 | -0.32347800 |
| C | 5.13743939  | 6.42170904 | 0.38863600  |
| C | 4.36166439  | 4.50559104 | 1.81972600  |
| H | 2.67494739  | 8.45271704 | 1.77025000  |
| H | 3.02624839  | 8.18948804 | 0.05638100  |
| C | 4.55890739  | 7.41638704 | 1.40899100  |
| H | 1.73096839  | 4.90551104 | 2.52534100  |
| H | 1.90908039  | 6.52327604 | 3.22266700  |
| C | 3.79326639  | 5.50416004 | 2.84248300  |
| H | 5.11751139  | 6.86344204 | -0.62234300 |
| H | 6.19351939  | 6.20552204 | 0.62678200  |
| H | 3.77345139  | 3.57273504 | 1.84000900  |
| H | 5.40159039  | 4.24343304 | 2.08165800  |
| H | 5.14042839  | 8.35401004 | 1.38678200  |
| C | 4.62224239  | 6.79886904 | 2.81632500  |
| H | 3.82580239  | 5.06053204 | 3.85208700  |
| H | 5.67008439  | 6.58867604 | 3.09253100  |
| H | 4.22935539  | 7.51340104 | 3.56058200  |
| C | 2.84363139  | 5.44541504 | 0.05822700  |
| H | 2.25325439  | 4.52237404 | 0.05349300  |
| H | 2.77563939  | 5.88356804 | -0.95104600 |

**B3LYP (E<sub>h</sub>):** -4904.295099

**M06-L (E<sub>h</sub>):** -4906.814977

**G-E (E<sub>h</sub>):** 0.856292

**Miscellaneous molecules:**

**COD:**

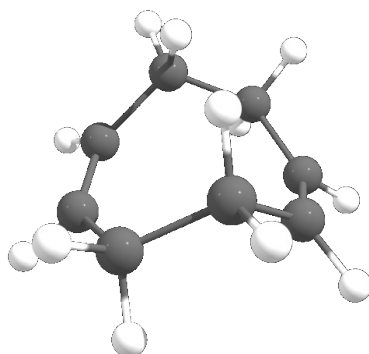

|   |             |            |             |
|---|-------------|------------|-------------|
| C | -0.47202799 | 1.80069927 | 0.00000000  |
| H | -0.76313599 | 0.87191027 | -0.50525600 |
| C | -1.66474499 | 4.73010627 | -0.28042300 |
| H | -2.26674599 | 5.33654627 | -0.96869600 |
| C | -2.37484399 | 3.49283127 | 0.20190900  |
| H | -2.89015299 | 3.04505827 | -0.66746800 |
| H | -3.19095299 | 3.79982927 | 0.88470700  |
| C | -1.53600299 | 2.40013027 | 0.88941800  |
| H | -1.10658599 | 2.78851327 | 1.82226500  |
| H | -2.22542499 | 1.59712727 | 1.19586600  |
| C | -0.43945799 | 5.19620927 | 0.00001100  |
| H | -0.14827699 | 6.12495427 | -0.50528400 |
| C | 0.62446301  | 4.59675727 | 0.88947700  |
| H | 0.19500201  | 4.20828327 | 1.82226000  |
| H | 1.31384801  | 5.39975527 | 1.19602100  |
| C | 1.46333101  | 3.50412727 | 0.20189200  |
| H | 1.97853901  | 3.95194827 | -0.66752300 |
| H | 2.27952101  | 3.19715027 | 0.88460500  |
| C | 0.75326201  | 2.26681927 | -0.28039500 |
| H | 1.35531401  | 1.66034227 | -0.96859300 |

**B3LYP (E<sub>h</sub>):** -311.843127

**M06-L (E<sub>h</sub>):** -312.127470

**G-E (E<sub>h</sub>):** 0.148365

**HOAc:**

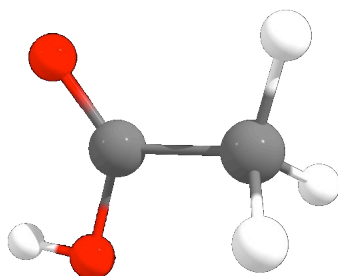

|   |             |            |             |
|---|-------------|------------|-------------|
| C | -0.47341116 | 1.84809062 | -0.02419283 |
| C | 1.01406884  | 1.60967962 | -0.02424783 |
| H | 1.29722684  | 1.01930562 | -0.90923683 |
| H | 1.54138684  | 2.57038562 | -0.02559583 |
| H | 1.29777984  | 1.02160162 | 0.86201117  |
| O | -1.01803516 | 2.92275462 | -0.02424383 |
| O | -1.16237716 | 0.68556262 | -0.02423083 |
| H | -2.10524616 | 0.92462262 | -0.02432183 |

**B3LYP (E<sub>h</sub>):** -228.924282

**M06-L (E<sub>h</sub>):** -229.17542

**G-E (E<sub>h</sub>):** 0.034649

**AcO<sup>-</sup>:**

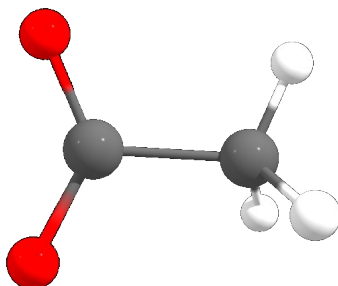

|   |             |            |             |
|---|-------------|------------|-------------|
| C | -0.25291829 | 1.18677041 | 0.00000000  |
| C | -1.83072129 | 1.13144141 | -0.00001100 |
| H | -2.21138929 | 0.09590341 | -0.00004600 |
| H | -2.22333729 | 1.66699141 | 0.88418200  |

|   |             |            |             |
|---|-------------|------------|-------------|
| H | -2.22332729 | 1.66704641 | -0.88417500 |
| O | 0.22194671  | 2.34415441 | -0.00001300 |
| O | 0.32965071  | 0.08100941 | -0.00001300 |

**B3LYP (E<sub>h</sub>):**               **-228.338549**

**M06-L (E<sub>h</sub>):**               **-228.676546**

**G-E (E<sub>h</sub>):**               **0.020310**

**HSAd:**

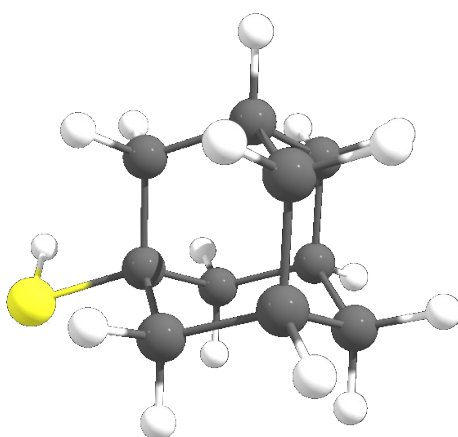

|   |             |            |             |
|---|-------------|------------|-------------|
| C | -0.77172504 | 1.88715950 | 0.00000000  |
| H | -0.38052604 | 2.38837650 | 0.89946700  |
| H | -0.39377904 | 0.85087950 | 0.01724500  |
| C | -0.24782504 | 2.60624850 | -1.25590800 |
| C | -2.31228604 | 1.89054350 | 0.00099800  |
| H | -2.67426304 | 1.37154450 | 0.90407000  |
| C | -2.81610604 | 3.34437250 | 0.00057300  |
| H | -2.46749804 | 3.86612650 | 0.90786600  |
| H | -3.91886404 | 3.36320450 | 0.02135200  |
| C | -0.76043604 | 4.06018850 | -1.25590000 |
| H | -0.37544504 | 4.58859750 | -2.14373300 |
| H | -0.37544304 | 4.58858850 | -0.36806200 |
| C | -2.30012504 | 4.06720550 | -1.25589900 |
| H | -2.65348504 | 5.11159450 | -1.25589200 |
| C | -2.81610704 | 3.34438750 | -2.51237900 |
| H | -3.91886504 | 3.36321850 | -2.53315600 |
| H | -2.46750004 | 3.86615250 | -3.41966600 |

|   |             |            |             |
|---|-------------|------------|-------------|
| C | -0.77172504 | 1.88717550 | -2.51182600 |
| H | -0.39377804 | 0.85089650 | -2.52908600 |
| H | -0.38052804 | 2.38840750 | -3.41128600 |
| C | -2.82719304 | 1.16772850 | -1.25591700 |
| H | -2.48624904 | 0.11835650 | -1.25592300 |
| H | -3.93014104 | 1.14764250 | -1.25591700 |
| C | -2.31228604 | 1.89055850 | -2.51282200 |
| H | -2.67426304 | 1.37157050 | -3.41590000 |
| S | 1.59821496  | 2.69625150 | -1.25590700 |
| H | 1.80990796  | 1.35888550 | -1.25591600 |

**B3LYP (E<sub>h</sub>):** -788.589746

**M06-L (E<sub>h</sub>):** -789.057744

**G-E (E<sub>h</sub>):** 0.209116

**TfO<sup>-</sup>:**

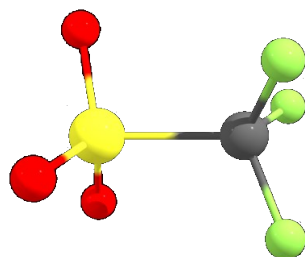

|   |            |             |             |
|---|------------|-------------|-------------|
| C | 3.01652888 | -0.67768598 | 0.00000000  |
| F | 2.51224188 | 0.48585602  | -0.45572800 |
| F | 2.51225588 | -0.86479298 | 1.23551900  |
| F | 2.51228288 | -1.65414398 | -0.77979300 |
| O | 5.20751688 | 0.45218102  | 0.90175500  |
| O | 5.20752188 | -0.46166598 | -1.42936100 |
| O | 5.20752988 | -2.02355498 | 0.52761100  |
| S | 4.89789088 | -0.67768298 | 0.00000300  |

**B3LYP (E<sub>h</sub>):** -960.961523

**M06-L (E<sub>h</sub>):** -961.870401

**G-E (E<sub>h</sub>):** -0.005264

## 2-Ph-PhOTf:

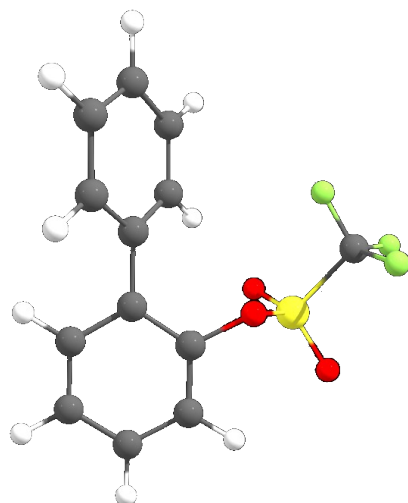

|   |             |             |             |
|---|-------------|-------------|-------------|
| C | 1.80548200  | 0.81851200  | 0.00955100  |
| C | 2.89747900  | 1.67936400  | -0.20168800 |
| C | 2.75540100  | 3.06648100  | -0.16040200 |
| C | 1.50787700  | 3.63515100  | 0.10958300  |
| C | 0.40875300  | 2.80976900  | 0.34834100  |
| C | 0.57178600  | 1.42561000  | 0.29257700  |
| H | 3.86969300  | 1.23626200  | -0.42678900 |
| H | 3.62159700  | 3.70581500  | -0.34395300 |
| H | 1.38791100  | 4.71987700  | 0.14517100  |
| H | -0.57128000 | 3.22241000  | 0.59048000  |
| C | 1.98639300  | -0.65520800 | -0.03674700 |
| C | 1.17021300  | -1.46902000 | -0.83965500 |
| C | 3.01396700  | -1.25486200 | 0.71074600  |
| C | 1.37238500  | -2.84900900 | -0.88204800 |
| H | 0.38333200  | -1.01704500 | -1.44298800 |
| C | 3.21452500  | -2.63572600 | 0.66660400  |
| H | 3.64749500  | -0.63191700 | 1.34642200  |
| C | 2.39215400  | -3.43777300 | -0.12900200 |
| H | 0.72923400  | -3.46763200 | -1.51246100 |
| H | 4.01257900  | -3.08702800 | 1.26101900  |
| H | 2.54651100  | -4.51888400 | -0.16304800 |
| O | -0.51910400 | 0.59801800  | 0.61037700  |
| S | -1.85152400 | 0.66152700  | -0.34536200 |

|   |             |             |             |
|---|-------------|-------------|-------------|
| C | -2.59938800 | -0.91579900 | 0.34340200  |
| F | -3.78964400 | -1.05750000 | -0.22457100 |
| F | -1.83615500 | -1.95362600 | 0.04384700  |
| F | -2.73617400 | -0.81586800 | 1.65405700  |
| O | -2.70718900 | 1.76475100  | 0.05282100  |
| O | -1.48959400 | 0.43619600  | -1.73515400 |

**B3LYP (E<sub>h</sub>):** -1423,298022

**M06-L (E<sub>h</sub>):** -1424,529961

**G-E (E<sub>h</sub>):** 0.154415

### 2-Ph-PhSAd:

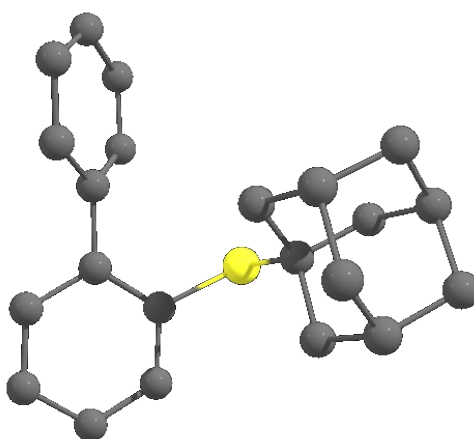

|   |             |             |             |
|---|-------------|-------------|-------------|
| C | -2.81468542 | 1.62587410  | 0.00000000  |
| C | -2.66502942 | 0.24366210  | -0.10465700 |
| C | -3.48616942 | -0.53041890 | -0.94577900 |
| C | -4.49699142 | 0.13306610  | -1.68589200 |
| C | -4.63008442 | 1.52724810  | -1.58128800 |
| C | -3.80069042 | 2.27498310  | -0.74560900 |
| H | -2.15261342 | 2.19629610  | 0.65586900  |
| H | -1.87774342 | -0.25918390 | 0.46108300  |
| H | -5.40655342 | 2.01747810  | -2.17073000 |
| H | -3.92332842 | 3.35863810  | -0.68057500 |
| C | -3.26044942 | -2.00040490 | -0.98990800 |
| C | -3.09819442 | -2.69076990 | -2.20225700 |
| C | -3.18571542 | -2.72844890 | 0.20945600  |

|   |              |             |             |
|---|--------------|-------------|-------------|
| C | -2.88332942  | -4.06954690 | -2.21264100 |
| H | -3.13934942  | -2.14087790 | -3.14218500 |
| C | -2.97869842  | -4.10916390 | 0.20025700  |
| H | -3.32087342  | -2.20641390 | 1.15956600  |
| C | -2.83016742  | -4.78581290 | -1.01299500 |
| H | -2.75607442  | -4.58854090 | -3.16578500 |
| H | -2.93878342  | -4.65827290 | 1.14417500  |
| H | -2.66954342  | -5.86657190 | -1.02426600 |
| S | -5.62841942  | -0.72448990 | -2.78163000 |
| C | -8.80026942  | -3.27597990 | -0.56544400 |
| H | -8.32296142  | -4.18404190 | -0.97088200 |
| H | -9.67223142  | -3.60511890 | 0.02489600  |
| C | -9.25706142  | -2.36130690 | -1.71507700 |
| H | -9.96197142  | -2.90440990 | -2.36622700 |
| C | -7.80841842  | -2.51536990 | 0.33117300  |
| H | -7.47003942  | -3.17033790 | 1.15121500  |
| C | -6.58682442  | -2.09009090 | -0.50508500 |
| H | -6.06874342  | -2.97123690 | -0.91211600 |
| H | -5.86515442  | -1.55799490 | 0.13221200  |
| C | -8.03346442  | -1.93652090 | -2.54832900 |
| H | -8.34628742  | -1.29333490 | -3.38757200 |
| H | -7.53776842  | -2.82147790 | -2.97991300 |
| C | -7.03835842  | -1.17445490 | -1.65262700 |
| C | -7.72677442  | 0.07185810  | -1.07542600 |
| H | -7.01692142  | 0.63434010  | -0.44894100 |
| H | -8.03500142  | 0.73617710  | -1.89891100 |
| C | -9.94194342  | -1.11136190 | -1.13586000 |
| H | -10.83277042 | -1.40377690 | -0.55453900 |
| H | -10.29039442 | -0.45728390 | -1.95309600 |
| C | -8.49190342  | -1.26554790 | 0.91115300  |
| H | -9.35700742  | -1.55766590 | 1.53043200  |
| H | -7.79204842  | -0.72320590 | 1.56941900  |
| C | -8.94985042  | -0.35149690 | -0.23834100 |
| H | -9.43455042  | 0.54985310  | 0.17250100  |



**B3LYP (E<sub>h</sub>):** -1250.418897

**M06-L (E<sub>h</sub>):** -1251.295872

**G-E (E<sub>h</sub>):** 0.359871

## 8. Crystallographic Data

Suitable crystals of **Ni1** for X-ray structure analysis were selected in a glovebox and coated with Parabar 10312. X-ray data were collected on a Bruker APEX III DUO (MoK $\alpha$  ( $\lambda = 0.71073$  Å)). The structure was solved by direct methods and refined against all data by full-matrix least-squares methods on F<sup>2</sup> using ShelXtl and ShelXle. However, due to bad crystal quality, only a connectivity could be obtained, and structural parameters should not be discussed. The structure of **Ni1** showed disorder in the solvent molecules and part of the ligand.

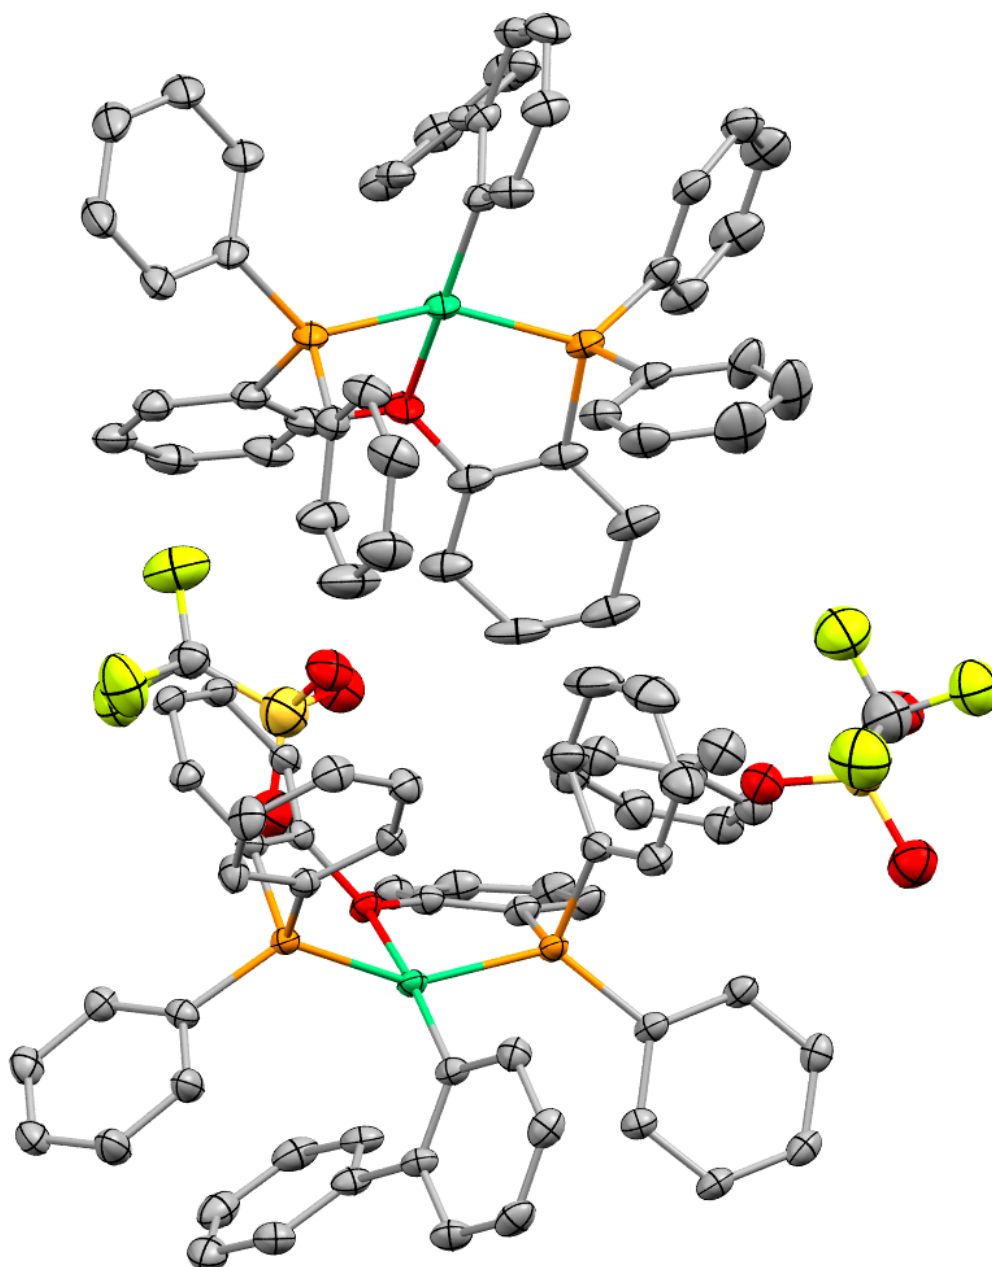

**Figure S184.** ORTEP of **Ni1**. Hydrogen atoms and the disorder of the whole molecule are omitted for clarity. The unit cell contains two independent molecules and one molecule of co-crystallized toluene. Atomic

displacement ellipsoids were set at 50% probability. The crystal quality does not allow for discussion of bond distances and angles.

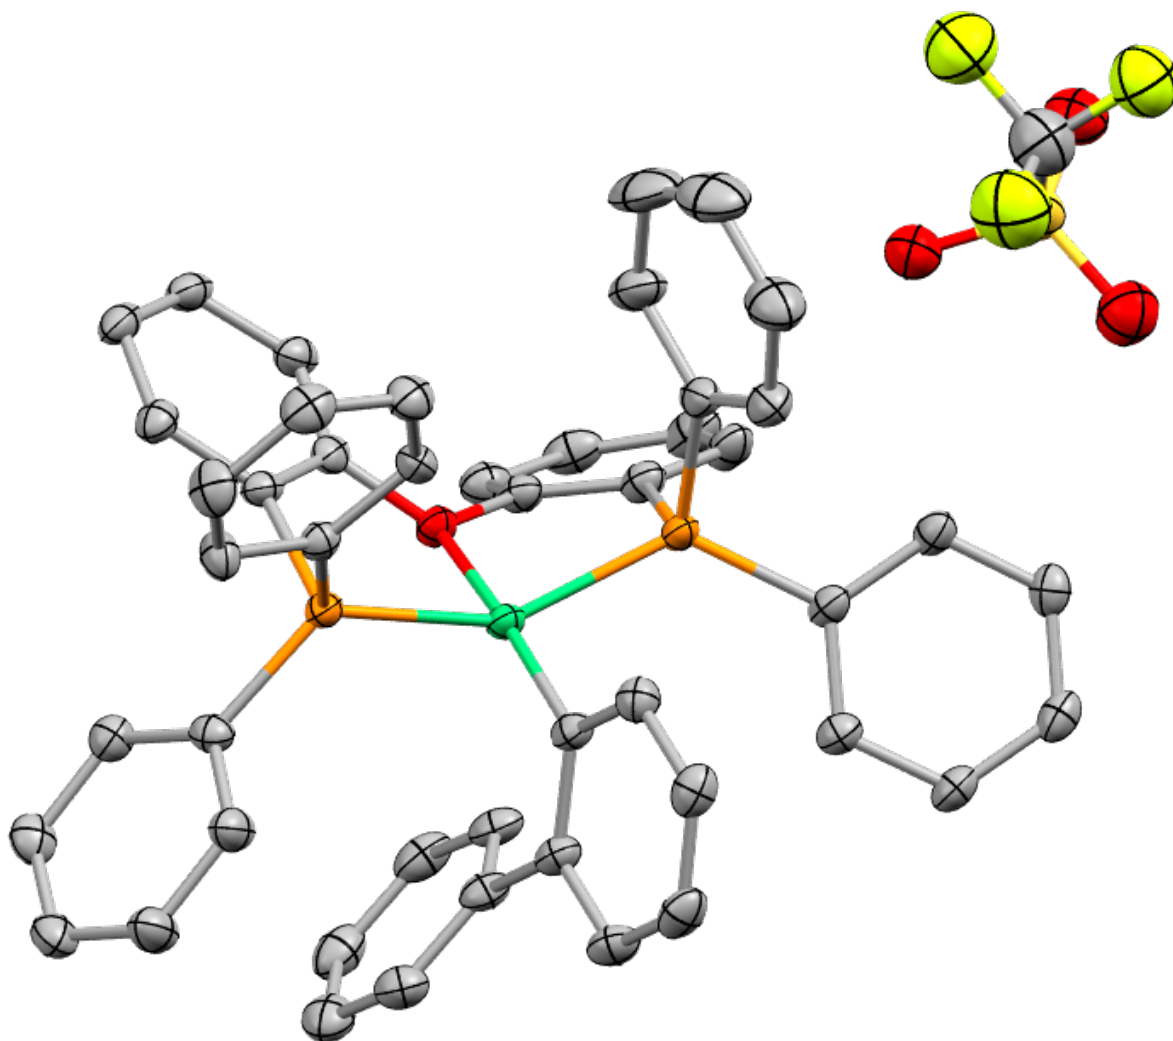

**Figure S185.** Molecular structure of **Ni1**. Only one molecules of the unit cell is displayed, and hydrogen atoms as well as co-crystallized toluene are omitted for clarity.

**Table S6.** Crystallographic data of Ni1.

| Empirical formula                                      | C <sub>52.5</sub> H <sub>41</sub> F <sub>3</sub> NiO <sub>4</sub> P <sub>2</sub> S |
|--------------------------------------------------------|------------------------------------------------------------------------------------|
| M <sub>r</sub> / g mol <sup>-1</sup>                   | 945.56                                                                             |
| T / [K]                                                | 100(2)                                                                             |
| λ / [Å]                                                | 0.71073                                                                            |
| Crystal system                                         | triclinic                                                                          |
| Space group                                            | P $\bar{1}$                                                                        |
| Z                                                      | 4                                                                                  |
| a [Å]                                                  | 13.2226(6)                                                                         |
| b [Å]                                                  | 13.9605(7)                                                                         |
| c [Å]                                                  | 24.1892(12)                                                                        |
| α [°]                                                  | 90.909(2)                                                                          |
| β [°]                                                  | 91.683(2)                                                                          |
| γ [°]                                                  | 94.416(2)                                                                          |
| V / [Å <sup>3</sup> ]                                  | 4449.3(4)                                                                          |
| D <sub>c</sub> / [mg m <sup>-3</sup> ]                 | 1.412                                                                              |
| μ / [mm <sup>-1</sup> ]                                | 0.615                                                                              |
| F(000)                                                 | 1956                                                                               |
| Crystal size / mm                                      | 0.303x0.247x0.190                                                                  |
| θ range / °                                            | 1.545– 27.359                                                                      |
| Limiting indices                                       | -17 ≤ h ≤ 17<br>-18 ≤ k ≤ 18<br>0 ≤ l ≤ 31                                         |
| Reflects. Collect.                                     | 20063                                                                              |
| Independent Reflects                                   | 20063                                                                              |
| Completeness                                           | 99.7%                                                                              |
| Absorp. Corr.                                          | empirical                                                                          |
| Parameters/ restraints                                 | 1405/1775                                                                          |
| R <sub>1</sub> , ωR <sub>2</sub> [I > 2σ(I)]           | 0.0667, 0.1868                                                                     |
| R <sub>1</sub> , ωR <sub>2</sub> (all data)            | 0.0870, 0.2031                                                                     |
| Goof on F <sup>2</sup>                                 | 1.141                                                                              |
| Δρ <sub>max,min</sub> / e <sup>-</sup> Å <sup>-3</sup> | 3.174, -1.433                                                                      |

## 9. GC-FID Calibration Data

The quantification of GC-yields was achieved by adding a standard compound (n-pentadecane) to reaction mixtures before quenching (usually 100  $\mu$ L) and applying the general formula:

$$\frac{A(\text{compound})}{A(\text{standard})} = R \times \frac{m(\text{compound})}{m(\text{standard})}$$

R: Response factor of compound

A: Peak area determined by GC-FID

m: mass of compound

The R values were determined by GC calibrations of respective compounds with pentadecane in ethyl acetate and measuring different mass ratios.

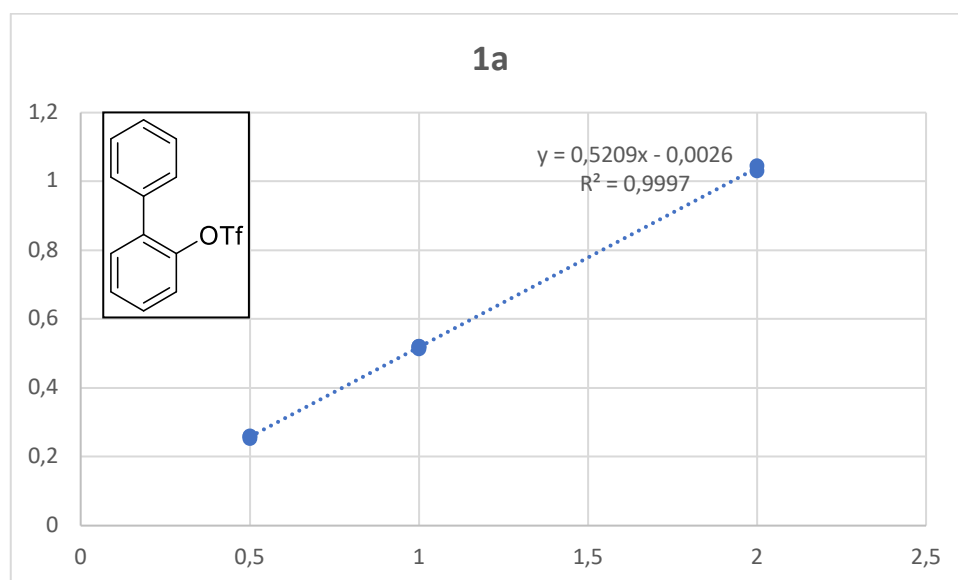

|    | m(Sub) | m(St)      | m(Sub)/m(St) | A(Sub) | A(St) | A(Sub)/A(St) |
|----|--------|------------|--------------|--------|-------|--------------|
| f1 | 2,47   | 4,93333333 | 0,5          | 3557   | 14054 | 0,2530952    |
| f2 | 2,47   | 4,93333333 | 0,5          | 3853   | 14900 | 0,2585906    |
| f3 | 2,47   | 4,93333333 | 0,5          | 3806   | 14588 | 0,26089937   |
| f4 | 2,47   | 2,46666667 | 1            | 3855   | 7397  | 0,52115723   |
| f5 | 2,47   | 2,46666667 | 1            | 3881   | 7480  | 0,51885027   |
| f6 | 2,47   | 2,46666667 | 1            | 3512   | 6740  | 0,52106825   |
| f7 | 4,93   | 2,46666667 | 2            | 7214   | 6890  | 1,04702467   |
| f8 | 4,93   | 2,46666667 | 2            | 7661   | 7431  | 1,03095142   |
| f9 | 2,47   | 2,46666667 | 1            | 3883   | 7558  | 0,51376025   |

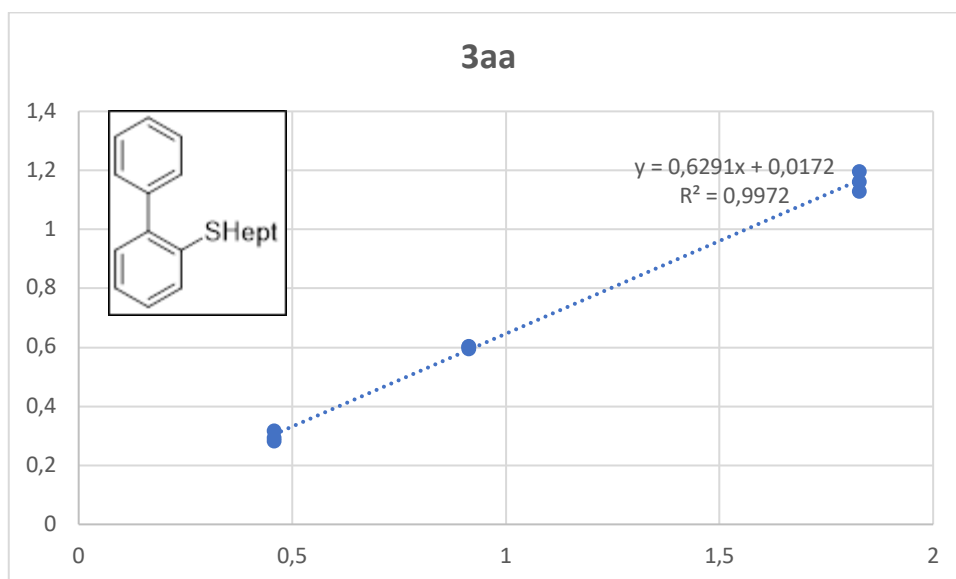

|    | <b>m(Sub)</b> | <b>m(St)</b> | <b>m(Sub)/m(St)</b> | <b>A(Sub)</b> | <b>A(St)</b> | <b>A(Sub)/A(St)</b> |
|----|---------------|--------------|---------------------|---------------|--------------|---------------------|
| f1 | 2,54          | 5,56666667   | 0,45658683          | 4468          | 14040        | 0,31823362          |
| f2 | 2,54          | 5,56666667   | 0,45658683          | 4457          | 15181        | 0,29359067          |
| f3 | 2,54          | 5,56666667   | 0,45658683          | 4217          | 14880        | 0,28340054          |
| f4 | 2,54          | 2,78333333   | 0,91317365          | 4772          | 8007         | 0,59597852          |
| f5 | 2,54          | 2,78333333   | 0,91317365          | 4648          | 7711         | 0,60277526          |
| f6 | 2,54          | 2,78333333   | 0,91317365          | 4228          | 7005         | 0,60356888          |
| f7 | 5,08          | 2,78333333   | 1,82634731          | 8449          | 7063         | 1,19623389          |
| f8 | 5,08          | 2,78333333   | 1,82634731          | 9077          | 8033         | 1,1299639           |
| f9 | 5,08          | 2,78333333   | 1,82634731          | 8386          | 7209         | 1,16326814          |

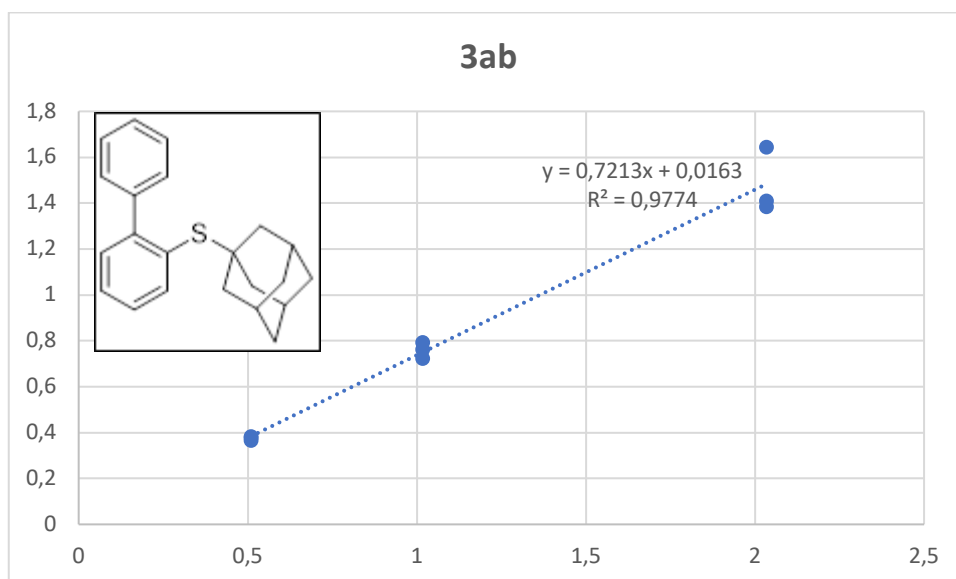

|    | <b>m(Sub)</b> | <b>m(St)</b> | <b>m(Sub)/m(St)</b> | <b>A(Sub)</b> | <b>A(St)</b> | <b>A(Sub)/A(St)</b> |
|----|---------------|--------------|---------------------|---------------|--------------|---------------------|
| f1 | 2,95          | 5,8          | 0,50862069          | 6289          | 16593        | 0,37901525          |
| f2 | 2,95          | 5,8          | 0,50862069          | 5675          | 14764        | 0,38438093          |
| f3 | 2,95          | 5,8          | 0,50862069          | 5574          | 15221        | 0,36620459          |
| f4 | 2,95          | 2,9          | 1,01724138          | 5572          | 7025         | 0,79316726          |
| f5 | 2,95          | 2,9          | 1,01724138          | 5723          | 7918         | 0,72278353          |
| f6 | 2,95          | 2,9          | 1,01724138          | 5934          | 7771         | 0,76360829          |
| f7 | 5,90          | 2,9          | 2,03448276          | 9784          | 7055         | 1,38681786          |
| f8 | 5,90          | 2,9          | 2,03448276          | 11193         | 6809         | 1,64385372          |
| f9 | 5,90          | 2,9          | 2,03448276          | 11087         | 7860         | 1,4105598           |

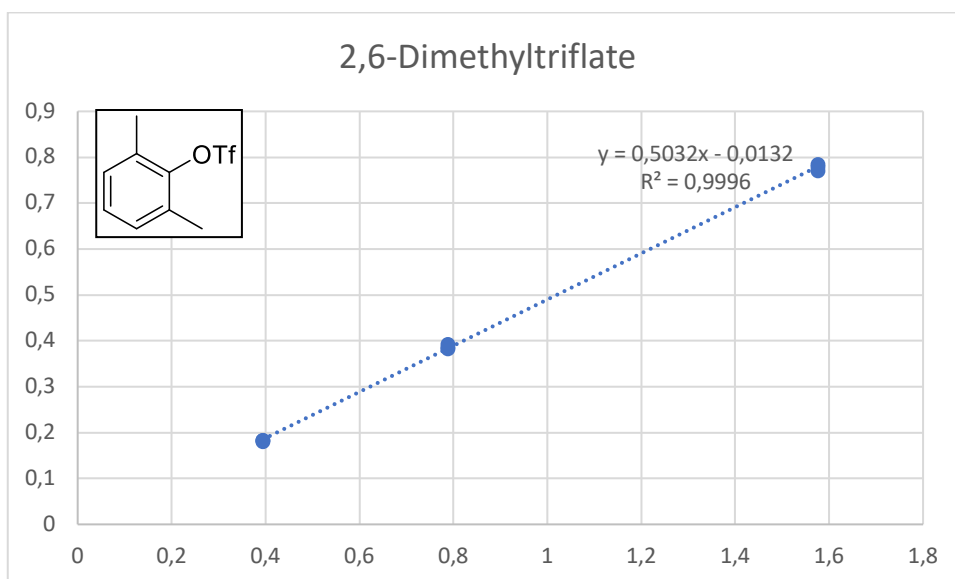

|    | <b>m(Sub)</b> | <b>m(St)</b> | <b>m(Sub)/m(St)</b> | <b>A(Sub)</b> | <b>A(St)</b> | <b>A(Sub)/A(St)</b> |
|----|---------------|--------------|---------------------|---------------|--------------|---------------------|
| f1 | 2,69          | 6,83333333   | 0,39390244          | 3292          | 18195        | 0,18092883          |
| f2 | 2,69          | 6,83333333   | 0,39390244          | 3392          | 18442        | 0,18392799          |
| f3 | 2,69          | 6,83333333   | 0,39390244          | 3316          | 18136        | 0,18284076          |
| f4 | 2,69          | 3,41666667   | 0,78780488          | 3191          | 8283         | 0,38524689          |
| f5 | 2,69          | 3,41666667   | 0,78780488          | 3389          | 8624         | 0,3929731           |
| f6 | 2,69          | 3,41666667   | 0,78780488          | 3200          | 8367         | 0,38245488          |
| f7 | 5,38          | 3,41666667   | 1,57560976          | 6970          | 8884         | 0,78455651          |
| f8 | 5,38          | 3,41666667   | 1,57560976          | 6591          | 8455         | 0,77953873          |
| f9 | 5,38          | 3,41666667   | 1,57560976          | 6685          | 8670         | 0,7710496           |



## 10. References

1. H. E. Gottlieb, V. Kotlyar and A. Nudelman, NMR chemical shifts of common laboratory solvents as trace impurities, *Journal of Organic Chemistry*, 1997, **62**, 7512-7515.
2. R. M. Oechsner, I. H. Lindenmaier and I. Fleischer, Nickel Catalyzed Cross-Coupling of Aryl and Alkenyl Triflates with Alkyl Thiols, *Org. Lett.*, 2023, **25**, 1655-1660.
3. R. Tang, J. Petit, Y. Yang, A. Link, F. Bächle, M.-E. L. Perrin, A. Amgoune and A. Tlili, Nickel-Catalyzed Trifluoromethylselenolation of Aryl and Alkenyl-Triflates: Scope and Mechanism, *ACS Catalysis*, 2023, **13**, 12553-12562.
4. T. Taeufer and J. Pospech, Palladium-Catalyzed Synthesis of N,N-Dimethylanilines via Buchwald–Hartwig Amination of (Hetero)aryl Triflates, *J. Org. Chem.*, 2020, **85**, 7097-7111.
5. J. W. W. Chang, E. Y. Chia, C. L. L. Chai and J. Seayad, Scope of direct arylation of fluorinated aromatics with aryl sulfonates, *Org. Biomol. Chem*, 2012, **10**, 2289-2299.
6. S.-L. Cai, Y. Li, C. Yang, J. Sheng and X.-S. Wang, NHC Ligand-Enabled, Palladium-Catalyzed Non-Directed C(sp<sup>3</sup>)–H Carbonylation To Access Indanone Cores, *ACS Catal.*, 2019, **9**, 10299-10304.
7. J. Hu, H. Hirao, Y. Li and J. Zhou, Palladium-Catalyzed Asymmetric Intermolecular Cyclization, *Angew. Chem. Int. Ed.*, 2013, **52**, 8676-8680.
8. D. A. Watson, M. Su, G. Teverovskiy, Y. Zhang, J. García-Fortanet, T. Kinzel and S. L. Buchwald, Formation of ArF from LPdAr(F): Catalytic Conversion of Aryl Triflates to Aryl Fluorides, *Science*, 2009, **325**, 1661-1664.
9. B.-Y. Li, L. Voets, R. Van Lommel, F. Hoppenbrouwers, M. Alonso, S. H. L. Verhelst, W. M. De Borggraeve and J. Demaerel, SuFEx-enabled, chemoselective synthesis of triflates, triflamides and triflimidates, *Chem. Sci.*, 2022, **13**, 2270-2279.
10. D. Gill, A. J. Hester and G. C. Lloyd-Jones, On the preparation of ortho-trifluoromethyl phenyl triflate, *Org. Biomol. Chem*, 2004, **2**, 2547-2548.
11. Z. Huang, Z. Liu and J. Zhou, An Enantioselective, Intermolecular  $\alpha$ -Arylation of Ester Enolates To Form Tertiary Stereocenters, *J. Am. Chem. Soc.*, 2011, **133**, 15882-15885.
12. S. T. Keaveney, G. Kundu and F. Schoenebeck, Modular Functionalization of Arenes in a Triply Selective Sequence: Rapid C(sp<sup>2</sup>) and C(sp<sup>3</sup>) Coupling of C–Br, C–OTf, and C–Cl Bonds Enabled by a Single Palladium(I) Dimer, *Angew. Chem. Int. Ed.*, 2018, **57**, 12573-12577.
13. S. Zhang, L. Yang, J. Fu, Q. Tan, K. Liu, T. Huang, C. Li, L. Liu and T. Chen, Palladium-catalyzed and norbornene-mediated C–H amination and C–O alkenylation of aryl triflates, *Org. Biomol. Chem*, 2023, **21**, 4398-4403.
14. C. W. Y. Chung and P. H. Toy, A polystyrene-supported triflating reagent for the synthesis of aryl triflates, *Tetrahedron*, 2005, **61**, 709-715.
15. F. Pisaneschi, J. J. P. Sejberg, C. Blain, W. H. Ng, E. O. Aboagye and A. C. Spivey, 2-Substituted-2,3-dihydro-1H-quinolin-4-ones via Acid-Catalyzed Tandem Rupe Rearrangement-Donnelly-Farrell Ring Closure of 2-(3'-Hydroxy-propynyl)anilines, *Synlett*, 2011, **2011**, 241-244.
16. Z. Xu and J. S. Godber, Purification and Identification of Components of  $\gamma$ -Oryzanol in Rice Bran Oil, *J. Agric. Food. Chem.*, 1999, **47**, 2724-2728.
17. H. Lee, Y. Lee and S. H. Cho, Palladium-Catalyzed Chemoselective Negishi Cross-Coupling of Bis[(pinacolato)boryl]methylzinc Halides with Aryl (Pseudo)Halides, *Org. Lett.*, 2019, **21**, 5912-5916.
18. H.-M. Huang, P. Bellotti, P. M. Pflüger, J. L. Schwarz, B. Heidrich and F. Glorius, Three-Component, Interrupted Radical Heck/Allylic Substitution Cascade Involving Unactivated Alkyl Bromides, *J. Am. Chem. Soc.*, 2020, **142**, 10173-10183.
19. M. J. Frisch, G. W. Trucks, H. B. Schlegel, G. E. Scuseria, M. A. Robb, J. R. Cheeseman, G. Scalmani, V. Barone, G. A. Petersson, H. Nakatsuji, X. Li, M. Caricato, A. V. Marenich, J. Bloino, B. G. Janesko, R. Gomperts, B. Mennucci, H. P. Hratchian, J. V. Ortiz, A. F. Izmaylov, J. L. Sonnenberg, Williams, F. Ding, F. Lipparini, F. Egidi, J. Goings, B. Peng, A. Petrone, T.

- Henderson, D. Ranasinghe, V. G. Zakrzewski, J. Gao, N. Rega, G. Zheng, W. Liang, M. Hada, M. Ehara, K. Toyota, R. Fukuda, J. Hasegawa, M. Ishida, T. Nakajima, Y. Honda, O. Kitao, H. Nakai, T. Vreven, K. Throssell, J. A. Montgomery Jr., J. E. Peralta, F. Ogliaro, M. J. Bearpark, J. J. Heyd, E. N. Brothers, K. N. Kudin, V. N. Staroverov, T. A. Keith, R. Kobayashi, J. Normand, K. Raghavachari, A. P. Rendell, J. C. Burant, S. S. Iyengar, J. Tomasi, M. Cossi, J. M. Millam, M. Klene, C. Adamo, R. Cammi, J. W. Ochterski, R. L. Martin, K. Morokuma, O. Farkas, J. B. Foresman and D. J. Fox, *Gaussian 16 Rev. C.01*, 2016.
20. S. Grimme, S. Ehrlich and L. Goerigk, Effect of the damping function in dispersion corrected density functional theory, *J. Comput. Chem.*, 2011, **32**, 1456-1465.
  21. F. Weigend and R. Ahlrichs, Balanced basis sets of split valence, triple zeta valence and quadruple zeta valence quality for H to Rn: Design and assessment of accuracy, *Phys. Chem. Chem. Phys.*, 2005, **7**, 3297-3305.
  22. F. Weigend, Accurate Coulomb-fitting basis sets for H to Rn, *Phys. Chem. Chem. Phys.*, 2006, **8**, 1057-1065.
  23. M. Page and J. W. Mclver, Jr., On evaluating the reaction path Hamiltonian, *J. Chem. Phys.*, 1988, **88**, 922-935.
  24. M. Page, C. Doubleday and J. W. Mclver, Jr., Following steepest descent reaction paths. The use of higher energy derivatives with ab initio electronic structure methods, *J. Chem. Phys.*, 1990, **93**, 5634-5642.
  25. D. A. McQuarrie and J. D. Simon, *Molecular Thermodynamics*, University Science Books, 1999.
  26. A. V. Marenich, C. J. Cramer and D. G. Truhlar, Universal Solvation Model Based on Solute Electron Density and on a Continuum Model of the Solvent Defined by the Bulk Dielectric Constant and Atomic Surface Tensions, *J. Phys. Chem. B*, 2009, **113**, 6378-6396.
  27. Y. Zhao and D. G. Truhlar, A new local density functional for main-group thermochemistry, transition metal bonding, thermochemical kinetics, and noncovalent interactions, *J. Chem. Phys.*, 2006, **125**.
